# Supplementary material for: Mendelian randomization analysis integrating GWAS and eQTL data identified potential regulatory genes associated with prostate cancer in neural cells
Source: Research Square preprint supplement (doi:10.21203/rs.3.rs-6747184/v1), 2025-07-21
Supplement: Supplementary file 1 [file c7672c231f9ab448a2b523f4.xlsx]

## Sheet: Supplementary table 13
id.exposure	id.outcome	outcome	exposure	method	nsnp	b	se	pval	lo_ci	up_ci	or	or_lci95	or_uci95
0lz4ar	Plcfx9	Bladder cancer	CERS5_ENSG00000139624	Inverse variance weighted	2	-0.000265221	0.000242986	0.27505	-0.000741474	0.000211032	0.999735	0.999259	1.00021
0PxlEt	Plcfx9	Bladder cancer	AL357153.2_ENSG00000257759	Wald ratio	1	-0.000224898	0.000359646	0.531754	-0.000929805	0.000480009	0.999775	0.999071	1.00048
0t0ay8	Plcfx9	Bladder cancer	SPATA20_ENSG00000006282	Wald ratio	1	-1.42824e-05	0.000296158	0.961537	-0.000594752	0.000566188	0.999986	0.999405	1.00057
0TgLkl	Plcfx9	Bladder cancer	BHMT_ENSG00000145692	Wald ratio	1	-0.000555633	0.000391361	0.155682	-0.0013227	0.000211434	0.999445	0.998678	1.00021
12UjmN	Plcfx9	Bladder cancer	HDHD3_ENSG00000119431	Wald ratio	1	0.000344628	0.000380975	0.36568	-0.000402083	0.00109134	1.00034	0.999598	1.00109
1EBoo2	Plcfx9	Bladder cancer	VARS2_ENSG00000137411	Inverse variance weighted	2	7.14386e-05	0.000271085	0.792144	-0.000459889	0.000602766	1.00007	0.99954	1.0006
1jhSDl	Plcfx9	Bladder cancer	PPM1K-DT_ENSG00000246375	Wald ratio	1	-4.62739e-05	0.000141104	0.742956	-0.000322838	0.00023029	0.999954	0.999677	1.00023
1JNUSP	Plcfx9	Bladder cancer	SUMF1_ENSG00000144455	Wald ratio	1	-5.25905e-05	0.000311355	0.865869	-0.000662847	0.000557666	0.999947	0.999337	1.00056
1mjj7H	Plcfx9	Bladder cancer	TMPRSS11D_ENSG00000153802	Inverse variance weighted	2	-0.000336523	0.000246893	0.172873	-0.000820433	0.000147387	0.999664	0.99918	1.00015
1NDUZT	Plcfx9	Bladder cancer	MARK3_ENSG00000075413	Inverse variance weighted	2	-0.000757581	0.000294878	0.0101954	-0.00133554	-0.00017962	0.999243	0.998665	0.99982
1qITwQ	Plcfx9	Bladder cancer	HFM1_ENSG00000162669	Wald ratio	1	0.000478263	0.000294931	0.104887	-9.98019e-05	0.00105633	1.00048	0.9999	1.00106
1QW7NY	Plcfx9	Bladder cancer	LDHC_ENSG00000166796	Inverse variance weighted	2	-0.0001022	0.000116045	0.378487	-0.000329649	0.000125249	0.999898	0.99967	1.00013
1twQVu	Plcfx9	Bladder cancer	MFAP3_ENSG00000037749	Wald ratio	1	-0.000309988	0.000302617	0.305666	-0.000903116	0.000283141	0.99969	0.999097	1.00028
1UqwqR	Plcfx9	Bladder cancer	HP_ENSG00000257017	MR Egger	3	-0.000593661	0.0011285	0.691698	-0.00280552	0.0016182	0.999407	0.997198	1.00162
1UqwqR	Plcfx9	Bladder cancer	HP_ENSG00000257017	Weighted median	3	-0.00011477	0.000138075	0.405853	-0.000385397	0.000155857	0.999885	0.999615	1.00016
1UqwqR	Plcfx9	Bladder cancer	HP_ENSG00000257017	Inverse variance weighted	3	-6.79061e-05	0.000116931	0.561417	-0.000297091	0.000161278	0.999932	0.999703	1.00016
1UqwqR	Plcfx9	Bladder cancer	HP_ENSG00000257017	Simple mode	3	-0.000122153	0.000168663	0.54418	-0.000452733	0.000208427	0.999878	0.999547	1.00021
1UqwqR	Plcfx9	Bladder cancer	HP_ENSG00000257017	Weighted mode	3	-0.000120797	0.00014759	0.499096	-0.000410074	0.000168479	0.999879	0.99959	1.00017
1XzCva	Plcfx9	Bladder cancer	CHRNA5_ENSG00000169684	Wald ratio	1	-0.000322273	0.000312058	0.301728	-0.000933906	0.00028936	0.999678	0.999067	1.00029
2b7fWm	Plcfx9	Bladder cancer	MTSS1L_ENSG00000132613	Wald ratio	1	-0.000202685	0.000408408	0.619697	-0.00100317	0.000597796	0.999797	0.998997	1.0006
2bKaIE	Plcfx9	Bladder cancer	AC010615.4_ENSG00000269237	MR Egger	3	0.000496122	0.00100246	0.707432	-0.00146869	0.00246094	1.0005	0.998532	1.00246
2bKaIE	Plcfx9	Bladder cancer	AC010615.4_ENSG00000269237	Weighted median	3	0.000200349	0.000140429	0.153669	-7.48919e-05	0.00047559	1.0002	0.999925	1.00048
2bKaIE	Plcfx9	Bladder cancer	AC010615.4_ENSG00000269237	Inverse variance weighted	3	0.000190045	0.000126164	0.131982	-5.72367e-05	0.000437327	1.00019	0.999943	1.00044
2bKaIE	Plcfx9	Bladder cancer	AC010615.4_ENSG00000269237	Simple mode	3	0.00020621	0.000173568	0.356769	-0.000133984	0.000546404	1.00021	0.999866	1.00055
2bKaIE	Plcfx9	Bladder cancer	AC010615.4_ENSG00000269237	Weighted mode	3	0.000207593	0.000173122	0.353282	-0.000131726	0.000546912	1.00021	0.999868	1.00055
2G9ssG	Plcfx9	Bladder cancer	CASC1_ENSG00000118307	Wald ratio	1	-3.48736e-05	0.000426628	0.934852	-0.000871065	0.000801318	0.999965	0.999129	1.0008
2h5zCP	Plcfx9	Bladder cancer	TMPRSS11A_ENSG00000187054	Inverse variance weighted	2	-0.000325418	0.000238746	0.172873	-0.000793361	0.000142524	0.999675	0.999207	1.00014
2it5ro	Plcfx9	Bladder cancer	LINC02328_ENSG00000258733	Wald ratio	1	0.000154054	0.000318852	0.628987	-0.000470896	0.000779005	1.00015	0.999529	1.00078
2xWly8	Plcfx9	Bladder cancer	TAF1C_ENSG00000103168	Inverse variance weighted	2	-4.00967e-05	0.000232358	0.862994	-0.000495518	0.000415325	0.99996	0.999505	1.00042
30BS0R	Plcfx9	Bladder cancer	SAXO2_ENSG00000188659	Wald ratio	1	-0.00057202	0.000404216	0.157029	-0.00136428	0.000220243	0.999428	0.998637	1.00022
3DWmhW	Plcfx9	Bladder cancer	DPH1_ENSG00000108963	Wald ratio	1	-0.000295984	0.000227074	0.192415	-0.000741048	0.000149081	0.999704	0.999259	1.00015
3iDCKA	Plcfx9	Bladder cancer	GPR35_ENSG00000178623	Wald ratio	1	0.000210135	0.000308329	0.495536	-0.000394189	0.000814459	1.00021	0.999606	1.00081
3WAJH8	Plcfx9	Bladder cancer	AL162725.2_ENSG00000237153	Wald ratio	1	-0.00025351	0.000416984	0.543214	-0.0010708	0.000563779	0.999747	0.99893	1.00056
3yrS5N	Plcfx9	Bladder cancer	ZNF429_ENSG00000197013	Inverse variance weighted	2	0.000260043	0.000185549	0.16107	-0.000103632	0.000623719	1.00026	0.999896	1.00062
4gNQIQ	Plcfx9	Bladder cancer	NWD1_ENSG00000188039	Wald ratio	1	0.000159896	0.000457964	0.726981	-0.000737714	0.00105751	1.00016	0.999263	1.00106
4hhrCk	Plcfx9	Bladder cancer	LINC02210-CRHR1_ENSG00000263715	MR Egger	6	-0.000917528	0.00127819	0.512552	-0.00342279	0.00158773	0.999083	0.996583	1.00159
4hhrCk	Plcfx9	Bladder cancer	LINC02210-CRHR1_ENSG00000263715	Weighted median	6	7.36185e-05	7.33421e-05	0.315491	-7.01321e-05	0.000217369	1.00007	0.99993	1.00022
4hhrCk	Plcfx9	Bladder cancer	LINC02210-CRHR1_ENSG00000263715	Inverse variance weighted	6	8.54249e-05	6.33736e-05	0.177672	-3.87874e-05	0.000209637	1.00009	0.999961	1.00021
4hhrCk	Plcfx9	Bladder cancer	LINC02210-CRHR1_ENSG00000263715	Simple mode	6	7.34523e-05	9.93409e-05	0.492896	-0.000121256	0.00026816	1.00007	0.999879	1.00027
4hhrCk	Plcfx9	Bladder cancer	LINC02210-CRHR1_ENSG00000263715	Weighted mode	6	7.34523e-05	0.000101192	0.50046	-0.000124885	0.000271789	1.00007	0.999875	1.00027
4HyWcn	Plcfx9	Bladder cancer	IFITM3_ENSG00000142089	Wald ratio	1	-0.000258488	0.000461029	0.575017	-0.0011621	0.000645128	0.999742	0.998839	1.00065
4lQPed	Plcfx9	Bladder cancer	AC090630.1_ENSG00000257239	Wald ratio	1	-0.000234882	0.000300832	0.434935	-0.000824513	0.000354748	0.999765	0.999176	1.00035
4Wdcif	Plcfx9	Bladder cancer	AL356441.1_ENSG00000236206	Wald ratio	1	0.000102644	0.000281985	0.715855	-0.000450047	0.000655334	1.0001	0.99955	1.00066
51QjkR	Plcfx9	Bladder cancer	LHX2_ENSG00000106689	Wald ratio	1	-0.000247374	0.000539195	0.646389	-0.0013042	0.000809448	0.999753	0.998697	1.00081
56srks	Plcfx9	Bladder cancer	AC131097.2_ENSG00000216921	Wald ratio	1	0.00039395	0.000338593	0.24463	-0.000269692	0.00105759	1.00039	0.99973	1.00106
5NszKP	Plcfx9	Bladder cancer	TBC1D16_ENSG00000167291	Wald ratio	1	0.000123186	0.000357971	0.730754	-0.000578437	0.000824809	1.00012	0.999422	1.00083
5rNOVa	Plcfx9	Bladder cancer	PPP2R3C_ENSG00000092020	Wald ratio	1	0.000154129	0.000320249	0.630319	-0.000473559	0.000781816	1.00015	0.999527	1.00078
5S346F	Plcfx9	Bladder cancer	AL512625.3_ENSG00000234665	Wald ratio	1	-6.60265e-05	0.00036327	0.855774	-0.000778035	0.000645982	0.999934	0.999222	1.00065
5U9EXb	Plcfx9	Bladder cancer	GSTT2B_ENSG00000133433	Wald ratio	1	-0.000237526	0.000226912	0.295204	-0.000682274	0.000207222	0.999763	0.999318	1.00021
6fsaFo	Plcfx9	Bladder cancer	LINC02427_ENSG00000271538	Wald ratio	1	0.000446703	0.000472372	0.344323	-0.000479147	0.00137255	1.00045	0.999521	1.00137
6Gg9nA	Plcfx9	Bladder cancer	PPP2R1B_ENSG00000137713	MR Egger	3	0.000849232	0.0177503	0.969565	-0.0339414	0.0356399	1.00085	0.966628	1.03628
6Gg9nA	Plcfx9	Bladder cancer	PPP2R1B_ENSG00000137713	Weighted median	3	-0.000506165	0.000278575	0.069221	-0.00105217	3.98433e-05	0.999494	0.998948	1.00004
6Gg9nA	Plcfx9	Bladder cancer	PPP2R1B_ENSG00000137713	Inverse variance weighted	3	-0.000432649	0.000229165	0.0590338	-0.000881812	1.65132e-05	0.999567	0.999119	1.00002
6Gg9nA	Plcfx9	Bladder cancer	PPP2R1B_ENSG00000137713	Simple mode	3	-0.000519063	0.000331128	0.257509	-0.00116807	0.000129948	0.999481	0.998833	1.00013
6Gg9nA	Plcfx9	Bladder cancer	PPP2R1B_ENSG00000137713	Weighted mode	3	-0.000519063	0.000321292	0.247564	-0.0011488	0.00011067	0.999481	0.998852	1.00011
6irxZ1	Plcfx9	Bladder cancer	SEPT2_ENSG00000168385	Wald ratio	1	0.000152333	0.000335187	0.64949	-0.000504634	0.000809299	1.00015	0.999495	1.00081
6p1CJx	Plcfx9	Bladder cancer	COLEC12_ENSG00000158270	Wald ratio	1	-0.000831334	0.000465331	0.0740114	-0.00174338	8.07149e-05	0.999169	0.998258	1.00008
6Tsi0m	Plcfx9	Bladder cancer	NARF_ENSG00000141562	Wald ratio	1	-0.000214785	0.000455246	0.63707	-0.00110707	0.000677498	0.999785	0.998894	1.00068
75Csjo	Plcfx9	Bladder cancer	AC011416.3_ENSG00000283897	Inverse variance weighted	2	0.000158901	0.000184443	0.388953	-0.000202607	0.00052041	1.00016	0.999797	1.00052
76hNcO	Plcfx9	Bladder cancer	ITIH4_ENSG00000055955	Wald ratio	1	-6.43523e-05	0.000422901	0.879054	-0.000893238	0.000764533	0.999936	0.999107	1.00076
79h6kZ	Plcfx9	Bladder cancer	PSORS1C1_ENSG00000204540	Wald ratio	1	0.000183495	0.000224255	0.413219	-0.000256045	0.000623036	1.00018	0.999744	1.00062
7boo4m	Plcfx9	Bladder cancer	ZNF273_ENSG00000198039	Inverse variance weighted	2	0.000373352	0.000254462	0.142315	-0.000125393	0.000872097	1.00037	0.999875	1.00087
7EIUlP	Plcfx9	Bladder cancer	CCDC88B_ENSG00000168071	Wald ratio	1	0.000267865	0.000369707	0.468739	-0.000456761	0.00099249	1.00027	0.999543	1.00099
7F3XMK	Plcfx9	Bladder cancer	GOLGA6L10_ENSG00000278662	MR Egger	3	0.00921654	0.0173927	0.689784	-0.0248732	0.0433063	1.00926	0.975434	1.04426
7F3XMK	Plcfx9	Bladder cancer	GOLGA6L10_ENSG00000278662	Weighted median	3	-0.000437133	0.000214135	0.0412117	-0.000856837	-1.74293e-05	0.999563	0.999144	0.999983
7F3XMK	Plcfx9	Bladder cancer	GOLGA6L10_ENSG00000278662	Inverse variance weighted	3	-0.000401393	0.000173839	0.0209441	-0.000742117	-6.06682e-05	0.999599	0.999258	0.999939
7F3XMK	Plcfx9	Bladder cancer	GOLGA6L10_ENSG00000278662	Simple mode	3	-0.000487324	0.000250448	0.191082	-0.000978201	3.55357e-06	0.999513	0.999022	1
7F3XMK	Plcfx9	Bladder cancer	GOLGA6L10_ENSG00000278662	Weighted mode	3	-0.000485288	0.000236488	0.1766	-0.000948805	-2.17707e-05	0.999515	0.999052	0.999978
7H648n	Plcfx9	Bladder cancer	SAAL1_ENSG00000166788	Inverse variance weighted	2	-0.000104969	0.000195008	0.590384	-0.000487184	0.000277247	0.999895	0.999513	1.00028
7qP36N	Plcfx9	Bladder cancer	JUP_ENSG00000173801	Inverse variance weighted	2	-0.000164859	0.000234019	0.481142	-0.000623536	0.000293818	0.999835	0.999377	1.00029
7qSiTH	Plcfx9	Bladder cancer	SERGEF_ENSG00000129158	Wald ratio	1	-0.000231468	0.000485853	0.633778	-0.00118374	0.000720804	0.999769	0.998817	1.00072
7reWsx	Plcfx9	Bladder cancer	ZSCAN18_ENSG00000121413	Wald ratio	1	-8.6612e-06	0.000422179	0.983632	-0.000836132	0.00081881	0.999991	0.999164	1.00082
7wRMDr	Plcfx9	Bladder cancer	ANKRD36_ENSG00000135976	MR Egger	5	0.00270173	0.00265993	0.384556	-0.00251174	0.00791519	1.00271	0.997491	1.00795
7wRMDr	Plcfx9	Bladder cancer	ANKRD36_ENSG00000135976	Weighted median	5	0.000586002	0.000212391	0.00579661	0.000169716	0.00100229	1.00059	1.00017	1.001
7wRMDr	Plcfx9	Bladder cancer	ANKRD36_ENSG00000135976	Inverse variance weighted	5	0.000539486	0.000180875	0.00285763	0.000184972	0.000894001	1.00054	1.00018	1.00089
7wRMDr	Plcfx9	Bladder cancer	ANKRD36_ENSG00000135976	Simple mode	5	0.00061935	0.000293172	0.102193	4.47323e-05	0.00119397	1.00062	1.00004	1.00119
7wRMDr	Plcfx9	Bladder cancer	ANKRD36_ENSG00000135976	Weighted mode	5	0.000628208	0.00029285	0.0985162	5.42216e-05	0.00120219	1.00063	1.00005	1.0012
8Bpgb2	Plcfx9	Bladder cancer	CWF19L1_ENSG00000095485	Inverse variance weighted	2	0.000354802	0.000243334	0.144816	-0.000122132	0.000831736	1.00035	0.999878	1.00083
8ETlQE	Plcfx9	Bladder cancer	MSH4_ENSG00000057468	Wald ratio	1	-6.7642e-05	0.000317078	0.83107	-0.000689115	0.000553831	0.999932	0.999311	1.00055
8jBPIs	Plcfx9	Bladder cancer	SLC25A24_ENSG00000085491	Wald ratio	1	-0.000188142	0.000326951	0.564991	-0.000828967	0.000452682	0.999812	0.999171	1.00045
8JDOjK	Plcfx9	Bladder cancer	TAB2_ENSG00000055208	Wald ratio	1	0.000405981	0.000267649	0.129307	-0.000118612	0.000930574	1.00041	0.999881	1.00093
8lI4TV	Plcfx9	Bladder cancer	ZNF680_ENSG00000173041	Inverse variance weighted	2	-0.000156592	0.000334513	0.6397	-0.000812237	0.000499054	0.999843	0.999188	1.0005
8Tte21	Plcfx9	Bladder cancer	C9orf72_ENSG00000147894	Wald ratio	1	0.000240099	0.000478585	0.61589	-0.000697929	0.00117813	1.00024	0.999302	1.00118
8uH8iB	Plcfx9	Bladder cancer	BEST1_ENSG00000167995	Wald ratio	1	-0.000443428	0.000335582	0.186378	-0.00110117	0.000214313	0.999557	0.998899	1.00021
8vvD40	Plcfx9	Bladder cancer	ERAP2_ENSG00000164308	Wald ratio	1	-0.000165529	0.00027059	0.540714	-0.000695885	0.000364827	0.999834	0.999304	1.00036
98gHOM	Plcfx9	Bladder cancer	MMUT_ENSG00000146085	MR Egger	3	0.0023077	0.00314413	0.596916	-0.0038548	0.0084702	1.00231	0.996153	1.00851
98gHOM	Plcfx9	Bladder cancer	MMUT_ENSG00000146085	Weighted median	3	0.000446096	0.000237014	0.0598158	-1.84518e-05	0.000910644	1.00045	0.999982	1.00091
98gHOM	Plcfx9	Bladder cancer	MMUT_ENSG00000146085	Inverse variance weighted	3	0.000420127	0.000197634	0.0335216	3.27638e-05	0.00080749	1.00042	1.00003	1.00081
98gHOM	Plcfx9	Bladder cancer	MMUT_ENSG00000146085	Simple mode	3	0.000469995	0.000263401	0.216299	-4.62702e-05	0.000986261	1.00047	0.999954	1.00099
98gHOM	Plcfx9	Bladder cancer	MMUT_ENSG00000146085	Weighted mode	3	0.000475501	0.000293104	0.246205	-9.89821e-05	0.00104998	1.00048	0.999901	1.00105
9a8T4i	Plcfx9	Bladder cancer	GOLGA8A_ENSG00000175265	Wald ratio	1	-0.000145846	0.000288324	0.612969	-0.00071096	0.000419269	0.999854	0.999289	1.00042
9ohjtS	Plcfx9	Bladder cancer	NSUN2_ENSG00000037474	Wald ratio	1	7.35758e-05	0.00015199	0.628326	-0.000224324	0.000371476	1.00007	0.999776	1.00037
9P19W2	Plcfx9	Bladder cancer	ABCC9_ENSG00000069431	Wald ratio	1	-0.000521214	0.00056847	0.35921	-0.00163541	0.000592987	0.999479	0.998366	1.00059
9QROjN	Plcfx9	Bladder cancer	ZNF589_ENSG00000164048	Inverse variance weighted	2	0.000234118	0.000227329	0.303073	-0.000211446	0.000679683	1.00023	0.999789	1.00068
9qUqPY	Plcfx9	Bladder cancer	PWP2_ENSG00000241945	Wald ratio	1	-1.60268e-05	0.000163007	0.921679	-0.000335521	0.000303467	0.999984	0.999665	1.0003
9Uixvc	Plcfx9	Bladder cancer	PCM1_ENSG00000078674	MR Egger	3	-0.000235274	0.00237369	0.937105	-0.00488771	0.00441716	0.999765	0.995124	1.00443
9Uixvc	Plcfx9	Bladder cancer	PCM1_ENSG00000078674	Weighted median	3	0.000325938	0.000205421	0.112585	-7.66874e-05	0.000728563	1.00033	0.999923	1.00073
9Uixvc	Plcfx9	Bladder cancer	PCM1_ENSG00000078674	Inverse variance weighted	3	0.000325733	0.000176439	0.0648693	-2.00861e-05	0.000671553	1.00033	0.99998	1.00067
9Uixvc	Plcfx9	Bladder cancer	PCM1_ENSG00000078674	Simple mode	3	0.000342113	0.000233906	0.2811	-0.000116342	0.000800568	1.00034	0.999884	1.0008
9Uixvc	Plcfx9	Bladder cancer	PCM1_ENSG00000078674	Weighted mode	3	0.000325966	0.000236323	0.301778	-0.000137227	0.000789159	1.00033	0.999863	1.00079
9Z6h8q	Plcfx9	Bladder cancer	SPATA7_ENSG00000042317	MR Egger	3	-0.00187784	0.00284149	0.62823	-0.00744716	0.00369148	0.998124	0.992581	1.0037
9Z6h8q	Plcfx9	Bladder cancer	SPATA7_ENSG00000042317	Weighted median	3	-0.000157022	0.00015213	0.301999	-0.000455196	0.000141153	0.999843	0.999545	1.00014
9Z6h8q	Plcfx9	Bladder cancer	SPATA7_ENSG00000042317	Inverse variance weighted	3	-0.000116983	0.000135435	0.38772	-0.000382435	0.000148469	0.999883	0.999618	1.00015
9Z6h8q	Plcfx9	Bladder cancer	SPATA7_ENSG00000042317	Simple mode	3	-0.000165671	0.000191652	0.478465	-0.000541308	0.000209967	0.999834	0.999459	1.00021
9Z6h8q	Plcfx9	Bladder cancer	SPATA7_ENSG00000042317	Weighted mode	3	-0.000164953	0.000191353	0.479519	-0.000540005	0.000210098	0.999835	0.99946	1.00021
A1shgK	Plcfx9	Bladder cancer	RPIA_ENSG00000153574	MR Egger	3	0.000149802	0.00230484	0.958681	-0.00436769	0.00466729	1.00015	0.995642	1.00468
A1shgK	Plcfx9	Bladder cancer	RPIA_ENSG00000153574	Weighted median	3	0.00033048	0.000203301	0.104042	-6.79908e-05	0.00072895	1.00033	0.999932	1.00073
A1shgK	Plcfx9	Bladder cancer	RPIA_ENSG00000153574	Inverse variance weighted	3	0.000301566	0.000167464	0.0717376	-2.66637e-05	0.000629796	1.0003	0.999973	1.00063
A1shgK	Plcfx9	Bladder cancer	RPIA_ENSG00000153574	Simple mode	3	0.000336891	0.00023394	0.286516	-0.000121631	0.000795413	1.00034	0.999878	1.0008
A1shgK	Plcfx9	Bladder cancer	RPIA_ENSG00000153574	Weighted mode	3	0.000336591	0.000229559	0.280237	-0.000113345	0.000786527	1.00034	0.999887	1.00079
a2DYcQ	Plcfx9	Bladder cancer	PLEKHH3_ENSG00000068137	Wald ratio	1	0.00030711	0.00034425	0.372332	-0.00036762	0.000981841	1.00031	0.999632	1.00098
A3Sk2D	Plcfx9	Bladder cancer	CCZ1B_ENSG00000146574	Inverse variance weighted	2	-0.000246156	0.000273569	0.368228	-0.000782352	0.000290039	0.999754	0.999218	1.00029
AeWhN1	Plcfx9	Bladder cancer	PRKRA_ENSG00000180228	Wald ratio	1	1.66547e-05	0.000409225	0.967536	-0.000785427	0.000818736	1.00002	0.999215	1.00082
aGKvxI	Plcfx9	Bladder cancer	IGFBP7_ENSG00000163453	Wald ratio	1	0.000105929	0.000225806	0.638989	-0.000336651	0.000548508	1.00011	0.999663	1.00055
aHcwfO	Plcfx9	Bladder cancer	COL16A1_ENSG00000084636	Wald ratio	1	-0.000660352	0.000430375	0.12494	-0.00150389	0.000183183	0.99934	0.998497	1.00018
AMYT9O	Plcfx9	Bladder cancer	AL589843.1_ENSG00000224848	Inverse variance weighted	2	0.000478293	0.000230117	0.0376653	2.72639e-05	0.000929322	1.00048	1.00003	1.00093
anaPE4	Plcfx9	Bladder cancer	DHFR2_ENSG00000178700	Wald ratio	1	0.000110118	0.000360384	0.759941	-0.000596234	0.00081647	1.00011	0.999404	1.00082
APwDHk	Plcfx9	Bladder cancer	RYK_ENSG00000163785	Inverse variance weighted	2	1.84759e-05	0.000337745	0.956374	-0.000643504	0.000680456	1.00002	0.999357	1.00068
AR53Jz	Plcfx9	Bladder cancer	PSMD13_ENSG00000185627	Wald ratio	1	-0.000373763	0.000387797	0.335141	-0.00113384	0.000386319	0.999626	0.998867	1.00039
AuAa8h	Plcfx9	Bladder cancer	TEAD2_ENSG00000074219	Wald ratio	1	0.000129436	0.000304621	0.670903	-0.000467621	0.000726493	1.00013	0.999532	1.00073
azfGdq	Plcfx9	Bladder cancer	AC010636.2_ENSG00000269110	Wald ratio	1	-0.000140864	0.000300106	0.638797	-0.000729073	0.000447344	0.999859	0.999271	1.00045
b1mS2b	Plcfx9	Bladder cancer	LURAP1_ENSG00000171357	Inverse variance weighted	2	8.68988e-05	0.000145238	0.549626	-0.000197768	0.000371565	1.00009	0.999802	1.00037
B4AT8u	Plcfx9	Bladder cancer	LINC01535_ENSG00000226686	Inverse variance weighted	2	-1.28467e-05	0.000248322	0.958741	-0.000499558	0.000473865	0.999987	0.999501	1.00047
B4eFjO	Plcfx9	Bladder cancer	AC096887.1_ENSG00000272305	Inverse variance weighted	2	0.000122126	0.000173778	0.482199	-0.000218478	0.00046273	1.00012	0.999782	1.00046
B89sxo	Plcfx9	Bladder cancer	LRMDA_ENSG00000148655	Wald ratio	1	-7.51305e-05	0.000183069	0.681517	-0.000433947	0.000283686	0.999925	0.999566	1.00028
bCbIGy	Plcfx9	Bladder cancer	MCOLN2_ENSG00000153898	Wald ratio	1	-0.000204181	0.000209697	0.330209	-0.000615188	0.000206826	0.999796	0.999385	1.00021
BCtB4x	Plcfx9	Bladder cancer	ECI2_ENSG00000198721	Wald ratio	1	-0.000119828	0.000269655	0.65677	-0.000648351	0.000408695	0.99988	0.999352	1.00041
bdOYCw	Plcfx9	Bladder cancer	AK3_ENSG00000147853	Wald ratio	1	1.22826e-05	0.000395309	0.975213	-0.000762523	0.000787088	1.00001	0.999238	1.00079
bEDi6B	Plcfx9	Bladder cancer	E2F7_ENSG00000165891	Wald ratio	1	-0.000407408	0.00028241	0.14913	-0.000960931	0.000146115	0.999593	0.99904	1.00015
bHh41G	Plcfx9	Bladder cancer	FKRP_ENSG00000181027	Wald ratio	1	-0.000231006	0.000317199	0.46645	-0.000852717	0.000390705	0.999769	0.999148	1.00039
bi5Dtp	Plcfx9	Bladder cancer	SLC46A3_ENSG00000139508	Wald ratio	1	4.0225e-05	0.000355189	0.909833	-0.000655946	0.000736396	1.00004	0.999344	1.00074
bKxf83	Plcfx9	Bladder cancer	IQCB1_ENSG00000173226	MR Egger	3	-0.000936685	0.00172725	0.683656	-0.00432209	0.00244872	0.999064	0.995687	1.00245
bKxf83	Plcfx9	Bladder cancer	IQCB1_ENSG00000173226	Weighted median	3	0.000320131	0.000184348	0.082466	-4.11919e-05	0.000681453	1.00032	0.999959	1.00068
bKxf83	Plcfx9	Bladder cancer	IQCB1_ENSG00000173226	Inverse variance weighted	3	0.000309691	0.000167291	0.0641396	-1.81999e-05	0.000637582	1.00031	0.999982	1.00064
bKxf83	Plcfx9	Bladder cancer	IQCB1_ENSG00000173226	Simple mode	3	0.000427645	0.000232668	0.207452	-2.83847e-05	0.000883674	1.00043	0.999972	1.00088
bKxf83	Plcfx9	Bladder cancer	IQCB1_ENSG00000173226	Weighted mode	3	0.0001905	0.00021089	0.461701	-0.000222845	0.000603844	1.00019	0.999777	1.0006
BLaaba	Plcfx9	Bladder cancer	THEM4_ENSG00000159445	Wald ratio	1	-7.76462e-05	0.000408362	0.849199	-0.000878036	0.000722743	0.999922	0.999122	1.00072
Bm0Kly	Plcfx9	Bladder cancer	ANTXR1_ENSG00000169604	Wald ratio	1	0.000351173	0.000670172	0.600276	-0.000962364	0.00166471	1.00035	0.999038	1.00167
BTDeno	Plcfx9	Bladder cancer	C3orf20_ENSG00000131379	Wald ratio	1	-9.89164e-05	0.000171809	0.564795	-0.000435662	0.000237829	0.999901	0.999564	1.00024
Bujvmz	Plcfx9	Bladder cancer	LINC02634_ENSG00000233200	Inverse variance weighted	2	0.000131395	0.000147376	0.372628	-0.000157462	0.000420252	1.00013	0.999843	1.00042
bWZ4e6	Plcfx9	Bladder cancer	SLC25A27_ENSG00000153291	Wald ratio	1	0.000159054	0.000308026	0.605599	-0.000444677	0.000762786	1.00016	0.999555	1.00076
BZ5NfP	Plcfx9	Bladder cancer	PACRG_ENSG00000112530	Wald ratio	1	5.19626e-05	0.000388806	0.893682	-0.000710097	0.000814022	1.00005	0.99929	1.00081
C1uGDZ	Plcfx9	Bladder cancer	AC027020.2_ENSG00000270127	Wald ratio	1	0.00012095	0.000147994	0.413779	-0.000169118	0.000411018	1.00012	0.999831	1.00041
CAEHqB	Plcfx9	Bladder cancer	WWOX_ENSG00000186153	Wald ratio	1	-0.000133096	0.000384902	0.729499	-0.000887504	0.000621311	0.999867	0.999113	1.00062
ccxvZU	Plcfx9	Bladder cancer	WBP2NL_ENSG00000183066	Inverse variance weighted	2	-8.30517e-06	0.000202423	0.967273	-0.000405053	0.000388443	0.999992	0.999595	1.00039
cdLk9O	Plcfx9	Bladder cancer	SPATA6L_ENSG00000106686	Wald ratio	1	2.62538e-05	0.000281008	0.925564	-0.000524521	0.000577029	1.00003	0.999476	1.00058
CHK6Ww	Plcfx9	Bladder cancer	STXBP6_ENSG00000168952	Wald ratio	1	-0.000230593	0.000232952	0.322236	-0.000687178	0.000225992	0.999769	0.999313	1.00023
cHWteX	Plcfx9	Bladder cancer	ZNF266_ENSG00000174652	MR Egger	3	-0.000249664	0.00121799	0.871288	-0.00263692	0.00213759	0.99975	0.997367	1.00214
cHWteX	Plcfx9	Bladder cancer	ZNF266_ENSG00000174652	Weighted median	3	-0.000318108	0.000181169	0.079111	-0.000673199	3.69824e-05	0.999682	0.999327	1.00004
cHWteX	Plcfx9	Bladder cancer	ZNF266_ENSG00000174652	Inverse variance weighted	3	-0.000315898	0.00015869	0.0465183	-0.00062693	-4.86545e-06	0.999684	0.999373	0.999995
cHWteX	Plcfx9	Bladder cancer	ZNF266_ENSG00000174652	Simple mode	3	-0.000327912	0.000215986	0.268277	-0.000751245	9.54217e-05	0.999672	0.999249	1.0001
cHWteX	Plcfx9	Bladder cancer	ZNF266_ENSG00000174652	Weighted mode	3	-0.000325918	0.000200543	0.245628	-0.000718982	6.71468e-05	0.999674	0.999281	1.00007
Ck4qna	Plcfx9	Bladder cancer	CCDC125_ENSG00000183323	Wald ratio	1	-0.000148816	0.000382629	0.697328	-0.000898768	0.000601136	0.999851	0.999102	1.0006
CngjSa	Plcfx9	Bladder cancer	TMPRSS5_ENSG00000166682	Wald ratio	1	0.000626553	0.000369294	0.0897677	-9.7263e-05	0.00135037	1.00063	0.999903	1.00135
Cpw77t	Plcfx9	Bladder cancer	PHKB_ENSG00000102893	MR Egger	5	-0.00197702	0.00554925	0.745222	-0.0128535	0.00889951	0.998025	0.987229	1.00894
Cpw77t	Plcfx9	Bladder cancer	PHKB_ENSG00000102893	Weighted median	5	0.000581777	0.000218073	0.00763472	0.000154354	0.0010092	1.00058	1.00015	1.00101
Cpw77t	Plcfx9	Bladder cancer	PHKB_ENSG00000102893	Inverse variance weighted	5	0.000607062	0.000182964	0.000906858	0.000248453	0.000965671	1.00061	1.00025	1.00097
Cpw77t	Plcfx9	Bladder cancer	PHKB_ENSG00000102893	Simple mode	5	0.000544587	0.000274437	0.118208	6.6912e-06	0.00108248	1.00054	1.00001	1.00108
Cpw77t	Plcfx9	Bladder cancer	PHKB_ENSG00000102893	Weighted mode	5	0.000545812	0.000275493	0.118636	5.84588e-06	0.00108578	1.00055	1.00001	1.00109
cqhK7L	Plcfx9	Bladder cancer	ITGAV_ENSG00000138448	MR Egger	6	0.00100148	0.00369	0.799512	-0.00623092	0.00823388	1.001	0.993788	1.00827
cqhK7L	Plcfx9	Bladder cancer	ITGAV_ENSG00000138448	Weighted median	6	0.000479065	0.000181527	0.00831315	0.000123271	0.000834858	1.00048	1.00012	1.00084
cqhK7L	Plcfx9	Bladder cancer	ITGAV_ENSG00000138448	Inverse variance weighted	6	0.000438709	0.000155033	0.00465804	0.000134844	0.000742573	1.00044	1.00013	1.00074
cqhK7L	Plcfx9	Bladder cancer	ITGAV_ENSG00000138448	Simple mode	6	0.000501527	0.000263213	0.115063	-1.43704e-05	0.00101742	1.0005	0.999986	1.00102
cqhK7L	Plcfx9	Bladder cancer	ITGAV_ENSG00000138448	Weighted mode	6	0.000500441	0.00025557	0.107544	-4.76184e-07	0.00100136	1.0005	1	1.001
CRGVLt	Plcfx9	Bladder cancer	S100A13_ENSG00000189171	Wald ratio	1	0.000350005	0.00044831	0.434967	-0.000528683	0.00122869	1.00035	0.999471	1.00123
CSqMZz	Plcfx9	Bladder cancer	LINS1_ENSG00000140471	Wald ratio	1	0.000185725	0.000201815	0.35743	-0.000209832	0.000581281	1.00019	0.99979	1.00058
cUzJ1Z	Plcfx9	Bladder cancer	AC007405.1_ENSG00000234350	Wald ratio	1	4.93902e-06	0.000243344	0.983807	-0.000472016	0.000481894	1	0.999528	1.00048
cwGsV4	Plcfx9	Bladder cancer	CDIP1_ENSG00000089486	Wald ratio	1	-0.000484651	0.000296826	0.102516	-0.00106643	9.71277e-05	0.999515	0.998934	1.0001
czhnSz	Plcfx9	Bladder cancer	AC147651.1_ENSG00000223855	Wald ratio	1	0.000152863	0.000242978	0.52927	-0.000323375	0.0006291	1.00015	0.999677	1.00063
D1RmJT	Plcfx9	Bladder cancer	CDK10_ENSG00000185324	Wald ratio	1	7.50328e-05	0.000438544	0.864149	-0.000784513	0.000934579	1.00008	0.999216	1.00094
d23T0Y	Plcfx9	Bladder cancer	KIF6_ENSG00000164627	Inverse variance weighted	2	0.000150933	0.000263925	0.567404	-0.00036636	0.000668226	1.00015	0.999634	1.00067
D9oDRc	Plcfx9	Bladder cancer	CHST3_ENSG00000122863	Wald ratio	1	-0.000248145	0.000484791	0.608749	-0.00119834	0.000702045	0.999752	0.998802	1.0007
dIMMF5	Plcfx9	Bladder cancer	GSTM3_ENSG00000134202	Wald ratio	1	-0.000180062	0.000304944	0.554872	-0.000777753	0.000417629	0.99982	0.999223	1.00042
DOj30y	Plcfx9	Bladder cancer	GSTO2_ENSG00000065621	Wald ratio	1	-0.000172197	0.000354946	0.627581	-0.000867892	0.000523498	0.999828	0.999132	1.00052
dU5ccO	Plcfx9	Bladder cancer	AC008758.6_ENSG00000269755	Wald ratio	1	-1.55107e-05	0.000327535	0.96223	-0.000657479	0.000626458	0.999984	0.999343	1.00063
DUC3fj	Plcfx9	Bladder cancer	NAPRT_ENSG00000147813	Wald ratio	1	0.000615605	0.000348764	0.0775458	-6.79716e-05	0.00129918	1.00062	0.999932	1.0013
dxjbFg	Plcfx9	Bladder cancer	NPIPB13_ENSG00000198064	Wald ratio	1	-0.000582639	0.000341281	0.0877829	-0.00125155	8.62722e-05	0.999418	0.998749	1.00009
e5J3UV	Plcfx9	Bladder cancer	ZDHHC21_ENSG00000175893	Inverse variance weighted	2	-0.000349973	0.000215426	0.104255	-0.000772207	7.22611e-05	0.99965	0.999228	1.00007
Ee6E4S	Plcfx9	Bladder cancer	PILRB_ENSG00000121716	Inverse variance weighted	2	-0.000223495	0.000167983	0.183366	-0.000552743	0.000105752	0.999777	0.999447	1.00011
EFRFsL	Plcfx9	Bladder cancer	CSDC2_ENSG00000172346	MR Egger	4	0.000497751	0.00100174	0.668513	-0.00146566	0.00246116	1.0005	0.998535	1.00246
EFRFsL	Plcfx9	Bladder cancer	CSDC2_ENSG00000172346	Weighted median	4	-9.77986e-05	0.000121951	0.422584	-0.000336823	0.000141226	0.999902	0.999663	1.00014
EFRFsL	Plcfx9	Bladder cancer	CSDC2_ENSG00000172346	Inverse variance weighted	4	-0.00012552	0.000105415	0.233764	-0.000332133	8.10937e-05	0.999874	0.999668	1.00008
EFRFsL	Plcfx9	Bladder cancer	CSDC2_ENSG00000172346	Simple mode	4	-7.10198e-05	0.00016349	0.693347	-0.00039146	0.000249421	0.999929	0.999609	1.00025
EFRFsL	Plcfx9	Bladder cancer	CSDC2_ENSG00000172346	Weighted mode	4	-7.38693e-05	0.000154759	0.665754	-0.000377197	0.000229459	0.999926	0.999623	1.00023
Egk5Px	Plcfx9	Bladder cancer	APTX_ENSG00000137074	Wald ratio	1	0.000532251	0.000394905	0.177725	-0.000241764	0.00130626	1.00053	0.999758	1.00131
EpFVjm	Plcfx9	Bladder cancer	PRKG1_ENSG00000185532	Wald ratio	1	-0.000192966	0.000192477	0.316084	-0.000570221	0.00018429	0.999807	0.99943	1.00018
Er2UwE	Plcfx9	Bladder cancer	LINC00500_ENSG00000249381	Wald ratio	1	-8.95907e-05	0.000177125	0.612993	-0.000436755	0.000257574	0.99991	0.999563	1.00026
etnyMs	Plcfx9	Bladder cancer	ACP6_ENSG00000162836	Wald ratio	1	6.21435e-05	0.000236994	0.793155	-0.000402365	0.000526652	1.00006	0.999598	1.00053
EtZr8N	Plcfx9	Bladder cancer	AC024361.2_ENSG00000263063	Wald ratio	1	-3.68211e-05	0.000339625	0.913665	-0.000702486	0.000628844	0.999963	0.999298	1.00063
EUFwIx	Plcfx9	Bladder cancer	NBPF26_ENSG00000273136	Inverse variance weighted	2	-0.000118619	0.000168065	0.480318	-0.000448027	0.000210789	0.999881	0.999552	1.00021
eyjqwQ	Plcfx9	Bladder cancer	DNAJC15_ENSG00000120675	Wald ratio	1	-3.10345e-06	0.000221969	0.988845	-0.000438162	0.000431955	0.999997	0.999562	1.00043
eyO3Fq	Plcfx9	Bladder cancer	ZNF559-ZNF177_ENSG00000270011	Inverse variance weighted	2	9.38802e-05	0.000225363	0.67699	-0.00034783	0.000535591	1.00009	0.999652	1.00054
f5f3E5	Plcfx9	Bladder cancer	NINL_ENSG00000101004	MR Egger	3	-0.00224477	0.00405244	0.677962	-0.0101876	0.00569802	0.997758	0.989864	1.00571
f5f3E5	Plcfx9	Bladder cancer	NINL_ENSG00000101004	Weighted median	3	4.82438e-05	0.000210346	0.818593	-0.000364034	0.000460522	1.00005	0.999636	1.00046
f5f3E5	Plcfx9	Bladder cancer	NINL_ENSG00000101004	Inverse variance weighted	3	0.000101132	0.000183288	0.581111	-0.000258114	0.000460377	1.0001	0.999742	1.00046
f5f3E5	Plcfx9	Bladder cancer	NINL_ENSG00000101004	Simple mode	3	3.36991e-05	0.000256646	0.907551	-0.000469328	0.000536726	1.00003	0.999531	1.00054
f5f3E5	Plcfx9	Bladder cancer	NINL_ENSG00000101004	Weighted mode	3	3.36991e-05	0.000244413	0.902966	-0.00044535	0.000512748	1.00003	0.999555	1.00051
faAacA	Plcfx9	Bladder cancer	SAMD9L_ENSG00000177409	Inverse variance weighted	2	-5.62109e-06	0.000231319	0.980613	-0.000459007	0.000447765	0.999994	0.999541	1.00045
faDStN	Plcfx9	Bladder cancer	WFDC10B_ENSG00000182931	Inverse variance weighted	2	0.000138073	0.00024553	0.57388	-0.000343166	0.000619311	1.00014	0.999657	1.00062
FaOlGp	Plcfx9	Bladder cancer	EGFR_ENSG00000146648	Wald ratio	1	0.000232415	0.00053866	0.666128	-0.000823358	0.00128819	1.00023	0.999177	1.00129
fcavGo	Plcfx9	Bladder cancer	XKR9_ENSG00000221947	MR Egger	4	0.00171911	0.00390957	0.703093	-0.00594365	0.00938187	1.00172	0.994074	1.00943
fcavGo	Plcfx9	Bladder cancer	XKR9_ENSG00000221947	Weighted median	4	-0.000243935	0.000108847	0.0250212	-0.000457275	-3.05942e-05	0.999756	0.999543	0.999969
fcavGo	Plcfx9	Bladder cancer	XKR9_ENSG00000221947	Inverse variance weighted	4	-0.000218615	9.63112e-05	0.0232147	-0.000407385	-2.98451e-05	0.999781	0.999593	0.99997
fcavGo	Plcfx9	Bladder cancer	XKR9_ENSG00000221947	Simple mode	4	-0.000247782	0.000138318	0.171149	-0.000518884	2.3321e-05	0.999752	0.999481	1.00002
fcavGo	Plcfx9	Bladder cancer	XKR9_ENSG00000221947	Weighted mode	4	-0.000247782	0.000142888	0.181315	-0.000527843	3.2279e-05	0.999752	0.999472	1.00003
fdYIrn	Plcfx9	Bladder cancer	FBXO27_ENSG00000161243	Wald ratio	1	-0.000434959	0.000345394	0.207918	-0.00111193	0.000242014	0.999565	0.998889	1.00024
FFx6q1	Plcfx9	Bladder cancer	USP6_ENSG00000129204	Wald ratio	1	0.000177135	0.000357681	0.620437	-0.00052392	0.000878191	1.00018	0.999476	1.00088
fHz1Vr	Plcfx9	Bladder cancer	AC107204.1_ENSG00000281392	Wald ratio	1	-6.16786e-05	0.000380348	0.871177	-0.000807161	0.000683804	0.999938	0.999193	1.00068
Fjl5wt	Plcfx9	Bladder cancer	TTC23_ENSG00000103852	Wald ratio	1	0.000166706	0.000348733	0.632628	-0.000516812	0.000850223	1.00017	0.999483	1.00085
FKOULo	Plcfx9	Bladder cancer	U2AF1_ENSG00000160201	Wald ratio	1	4.44307e-05	0.000163814	0.786218	-0.000276646	0.000365507	1.00004	0.999723	1.00037
FLcLzF	Plcfx9	Bladder cancer	DMGDH_ENSG00000132837	Wald ratio	1	-0.000950898	0.000504532	0.0594684	-0.00193978	3.79838e-05	0.99905	0.998062	1.00004
FlnjN5	Plcfx9	Bladder cancer	DRD2_ENSG00000149295	Wald ratio	1	-9.39631e-05	0.000280306	0.737462	-0.000643364	0.000455438	0.999906	0.999357	1.00046
FONyWu	Plcfx9	Bladder cancer	AC138123.2_ENSG00000257746	Wald ratio	1	0.000116805	0.000356583	0.743239	-0.000582097	0.000815707	1.00012	0.999418	1.00082
fSjj6h	Plcfx9	Bladder cancer	MALRD1_ENSG00000204740	Wald ratio	1	0.000111258	0.000332443	0.737876	-0.00054033	0.000762846	1.00011	0.99946	1.00076
FTlTMC	Plcfx9	Bladder cancer	MFHAS1_ENSG00000147324	MR Egger	3	0.0013149	0.0031892	0.751043	-0.00493594	0.00756574	1.00132	0.995076	1.00759
FTlTMC	Plcfx9	Bladder cancer	MFHAS1_ENSG00000147324	Weighted median	3	-0.000216959	0.000316674	0.49327	-0.00083764	0.000403722	0.999783	0.999163	1.0004
FTlTMC	Plcfx9	Bladder cancer	MFHAS1_ENSG00000147324	Inverse variance weighted	3	-0.000301539	0.000272865	0.269124	-0.000836355	0.000233277	0.999699	0.999164	1.00023
FTlTMC	Plcfx9	Bladder cancer	MFHAS1_ENSG00000147324	Simple mode	3	-0.000215077	0.000376882	0.62579	-0.000953766	0.000523611	0.999785	0.999047	1.00052
FTlTMC	Plcfx9	Bladder cancer	MFHAS1_ENSG00000147324	Weighted mode	3	-0.000215077	0.000367704	0.6178	-0.000935778	0.000505623	0.999785	0.999065	1.00051
G6SO4f	Plcfx9	Bladder cancer	FAM118A_ENSG00000100376	Wald ratio	1	0.000168579	0.000209023	0.419947	-0.000241105	0.000578264	1.00017	0.999759	1.00058
g7N6NT	Plcfx9	Bladder cancer	SGMS1_ENSG00000198964	Inverse variance weighted	2	0.000114526	0.000359013	0.749725	-0.000589139	0.000818191	1.00011	0.999411	1.00082
G8EeeA	Plcfx9	Bladder cancer	LINC01114_ENSG00000234177	Wald ratio	1	8.83843e-05	0.000342399	0.796304	-0.000582717	0.000759486	1.00009	0.999417	1.00076
g8eIos	Plcfx9	Bladder cancer	SLC7A6OS_ENSG00000103061	Wald ratio	1	-0.000194949	0.000356937	0.584947	-0.000894545	0.000504647	0.999805	0.999106	1.0005
GaLIO7	Plcfx9	Bladder cancer	RHD_ENSG00000187010	Wald ratio	1	-5.8077e-05	0.000218247	0.790157	-0.000485841	0.000369687	0.999942	0.999514	1.00037
gcItui	Plcfx9	Bladder cancer	IDH2-DT_ENSG00000259685	Wald ratio	1	0.000379909	0.00045636	0.40514	-0.000514556	0.00127437	1.00038	0.999486	1.00128
gDsPbM	Plcfx9	Bladder cancer	SBSPON_ENSG00000164764	Wald ratio	1	0.000379172	0.000433666	0.381932	-0.000470813	0.00122916	1.00038	0.999529	1.00123
gj5VVX	Plcfx9	Bladder cancer	PM20D1_ENSG00000162877	Inverse variance weighted	2	0.000196465	0.000177625	0.268696	-0.000151679	0.00054461	1.0002	0.999848	1.00054
GKVdi4	Plcfx9	Bladder cancer	ST8SIA1_ENSG00000111728	Wald ratio	1	-2.67249e-05	0.000302971	0.92971	-0.000620549	0.000567099	0.999973	0.99938	1.00057
gl4xAV	Plcfx9	Bladder cancer	ATP10B_ENSG00000118322	Wald ratio	1	0.000233425	0.00016655	0.161056	-9.30136e-05	0.000559863	1.00023	0.999907	1.00056
gmRt4q	Plcfx9	Bladder cancer	MIR4300HG_ENSG00000245832	Wald ratio	1	7.04743e-05	0.00014647	0.63041	-0.000216608	0.000357556	1.00007	0.999783	1.00036
gQTF84	Plcfx9	Bladder cancer	NPIPB2_ENSG00000234719	Wald ratio	1	7.90157e-05	0.000155112	0.610464	-0.000225004	0.000383035	1.00008	0.999775	1.00038
gt2Jq8	Plcfx9	Bladder cancer	TFB1M_ENSG00000029639	Wald ratio	1	-0.000397435	0.000330918	0.229748	-0.00104604	0.000251165	0.999603	0.998955	1.00025
H7UXQN	Plcfx9	Bladder cancer	MAGI1_ENSG00000151276	Wald ratio	1	-9.12043e-05	0.000330269	0.782432	-0.000738533	0.000556124	0.999909	0.999262	1.00056
h9LYOf	Plcfx9	Bladder cancer	STXBP4_ENSG00000166263	Inverse variance weighted	2	-5.92256e-05	0.000286099	0.836002	-0.000619981	0.000501529	0.999941	0.99938	1.0005
HAGcBy	Plcfx9	Bladder cancer	MDFIC_ENSG00000135272	Wald ratio	1	-0.00069052	0.000425669	0.104761	-0.00152483	0.000143791	0.99931	0.998476	1.00014
HJdu6N	Plcfx9	Bladder cancer	ZNF404_ENSG00000176222	Wald ratio	1	-0.000218523	0.000303063	0.470881	-0.000812527	0.000375482	0.999782	0.999188	1.00038
HKy7Lb	Plcfx9	Bladder cancer	MPPE1_ENSG00000154889	Wald ratio	1	-0.000246972	0.000226072	0.274635	-0.000690073	0.000196128	0.999753	0.99931	1.0002
HmqYqX	Plcfx9	Bladder cancer	CCDC163_ENSG00000280670	Inverse variance weighted	2	-0.000186243	0.000221766	0.401011	-0.000620904	0.000248418	0.999814	0.999379	1.00025
hSAdPg	Plcfx9	Bladder cancer	LEPR_ENSG00000116678	Wald ratio	1	-0.000341798	0.000279596	0.221529	-0.000889806	0.00020621	0.999658	0.999111	1.00021
HwTHyt	Plcfx9	Bladder cancer	CEP128_ENSG00000100629	Wald ratio	1	8.45379e-05	0.000298212	0.776807	-0.000499958	0.000669034	1.00008	0.9995	1.00067
i1YvFI	Plcfx9	Bladder cancer	CLHC1_ENSG00000162994	Wald ratio	1	-8.96541e-05	0.000222592	0.687115	-0.000525935	0.000346627	0.99991	0.999474	1.00035
i3m01U	Plcfx9	Bladder cancer	PTER_ENSG00000165983	Wald ratio	1	0.000152366	0.000249743	0.541801	-0.00033713	0.000641862	1.00015	0.999663	1.00064
i6c7nC	Plcfx9	Bladder cancer	AC006504.5_ENSG00000267575	MR Egger	5	-0.00368755	0.00869537	0.700078	-0.0207305	0.0133554	0.996319	0.979483	1.01344
i6c7nC	Plcfx9	Bladder cancer	AC006504.5_ENSG00000267575	Weighted median	5	-0.000264856	0.000129246	0.0404382	-0.000518177	-1.15344e-05	0.999735	0.999482	0.999988
i6c7nC	Plcfx9	Bladder cancer	AC006504.5_ENSG00000267575	Inverse variance weighted	5	-0.000282976	0.00010012	0.00470773	-0.00047921	-8.67416e-05	0.999717	0.999521	0.999913
i6c7nC	Plcfx9	Bladder cancer	AC006504.5_ENSG00000267575	Simple mode	5	-0.000263297	0.000159195	0.173485	-0.00057532	4.87253e-05	0.999737	0.999425	1.00005
i6c7nC	Plcfx9	Bladder cancer	AC006504.5_ENSG00000267575	Weighted mode	5	-0.000263594	0.000143222	0.139524	-0.000544309	1.71206e-05	0.999736	0.999456	1.00002
I71IJ2	Plcfx9	Bladder cancer	TULP3_ENSG00000078246	Wald ratio	1	-9.9744e-05	0.00021959	0.649665	-0.000530141	0.000330653	0.9999	0.99947	1.00033
iAK1C7	Plcfx9	Bladder cancer	CHURC1-FNTB_ENSG00000125954	Wald ratio	1	-0.000575253	0.000507892	0.25737	-0.00157072	0.000420215	0.999425	0.998431	1.00042
iE5uAH	Plcfx9	Bladder cancer	CTBS_ENSG00000117151	Wald ratio	1	0.000253688	0.000377253	0.501291	-0.000485729	0.000993104	1.00025	0.999514	1.00099
iGG21I	Plcfx9	Bladder cancer	RERE_ENSG00000142599	Wald ratio	1	-0.000105411	0.00042474	0.803998	-0.000937902	0.00072708	0.999895	0.999063	1.00073
IGGNBE	Plcfx9	Bladder cancer	EMP2_ENSG00000213853	Wald ratio	1	0.000239867	0.000262915	0.361592	-0.000275446	0.000755179	1.00024	0.999725	1.00076
iInfkp	Plcfx9	Bladder cancer	FN3K_ENSG00000167363	Wald ratio	1	7.71805e-05	0.000285943	0.787225	-0.000483267	0.000637628	1.00008	0.999517	1.00064
ijgzOV	Plcfx9	Bladder cancer	AC005670.2_ENSG00000262633	MR Egger	3	-7.78815e-05	0.00288958	0.982846	-0.00574145	0.00558569	0.999922	0.994275	1.0056
ijgzOV	Plcfx9	Bladder cancer	AC005670.2_ENSG00000262633	Weighted median	3	0.000100095	0.000130198	0.442015	-0.000155093	0.000355284	1.0001	0.999845	1.00036
ijgzOV	Plcfx9	Bladder cancer	AC005670.2_ENSG00000262633	Inverse variance weighted	3	9.17881e-05	0.000113194	0.41743	-0.000130073	0.000313649	1.00009	0.99987	1.00031
ijgzOV	Plcfx9	Bladder cancer	AC005670.2_ENSG00000262633	Simple mode	3	0.000100244	0.000158706	0.592195	-0.00021082	0.000411307	1.0001	0.999789	1.00041
ijgzOV	Plcfx9	Bladder cancer	AC005670.2_ENSG00000262633	Weighted mode	3	0.000100244	0.000147332	0.566455	-0.000188527	0.000389014	1.0001	0.999811	1.00039
ImUbtQ	Plcfx9	Bladder cancer	PCBP3_ENSG00000183570	Inverse variance weighted	2	-0.000157533	0.00015847	0.320178	-0.000468134	0.000153067	0.999842	0.999532	1.00015
INz0ac	Plcfx9	Bladder cancer	LINC00499_ENSG00000251372	Wald ratio	1	-7.94874e-05	0.00015715	0.612993	-0.000387502	0.000228527	0.999921	0.999613	1.00023
Io9Xew	Plcfx9	Bladder cancer	LCA5L_ENSG00000157578	Wald ratio	1	-0.00041936	0.00030235	0.165441	-0.00101197	0.000173246	0.999581	0.998989	1.00017
ipmsPJ	Plcfx9	Bladder cancer	RAB27A_ENSG00000069974	Wald ratio	1	0.000131598	0.000414055	0.750617	-0.00067995	0.000943145	1.00013	0.99932	1.00094
IQPHQG	Plcfx9	Bladder cancer	OR3A2_ENSG00000221882	Inverse variance weighted	2	0.000401299	0.000175647	0.0223311	5.70306e-05	0.000745568	1.0004	1.00006	1.00075
irjruC	Plcfx9	Bladder cancer	LINC01876_ENSG00000226383	Wald ratio	1	0.000156607	0.000219975	0.476508	-0.000274544	0.000587758	1.00016	0.999725	1.00059
IS6w9B	Plcfx9	Bladder cancer	TBC1D31_ENSG00000156787	Wald ratio	1	-0.000114009	0.000244542	0.641062	-0.000593311	0.000365293	0.999886	0.999407	1.00037
iswTyN	Plcfx9	Bladder cancer	ADCY3_ENSG00000138031	Wald ratio	1	0.000292226	0.000217656	0.179401	-0.000134381	0.000718832	1.00029	0.999866	1.00072
iUtvlT	Plcfx9	Bladder cancer	LYSMD4_ENSG00000183060	Wald ratio	1	0.000129989	0.000228442	0.569339	-0.000317757	0.000577736	1.00013	0.999682	1.00058
iVFo5J	Plcfx9	Bladder cancer	APIP_ENSG00000149089	MR Egger	3	-0.000278637	0.000873744	0.803472	-0.00199118	0.0014339	0.999721	0.998011	1.00143
iVFo5J	Plcfx9	Bladder cancer	APIP_ENSG00000149089	Weighted median	3	-0.000166202	9.19052e-05	0.0705427	-0.000346336	1.39319e-05	0.999834	0.999654	1.00001
iVFo5J	Plcfx9	Bladder cancer	APIP_ENSG00000149089	Inverse variance weighted	3	-0.000178504	8.17166e-05	0.0289307	-0.000338669	-1.83396e-05	0.999822	0.999661	0.999982
iVFo5J	Plcfx9	Bladder cancer	APIP_ENSG00000149089	Simple mode	3	-0.000161712	0.000103071	0.257218	-0.000363731	4.03075e-05	0.999838	0.999636	1.00004
iVFo5J	Plcfx9	Bladder cancer	APIP_ENSG00000149089	Weighted mode	3	-0.000160354	0.000114448	0.296191	-0.000384673	6.39636e-05	0.99984	0.999615	1.00006
J08pQQ	Plcfx9	Bladder cancer	CD151_ENSG00000177697	Wald ratio	1	-0.000423213	0.000341071	0.214667	-0.00109171	0.000245286	0.999577	0.998909	1.00025
j0nwWy	Plcfx9	Bladder cancer	ASTN2_ENSG00000148219	Wald ratio	1	0.000202669	0.000453714	0.6551	-0.00068661	0.00109195	1.0002	0.999314	1.00109
J10JDE	Plcfx9	Bladder cancer	GPR171_ENSG00000174946	MR Egger	3	-9.31189e-05	0.001258	0.952962	-0.0025588	0.00237256	0.999907	0.997444	1.00238
J10JDE	Plcfx9	Bladder cancer	GPR171_ENSG00000174946	Weighted median	3	-0.00012181	0.000174212	0.484423	-0.000463265	0.000219645	0.999878	0.999537	1.00022
J10JDE	Plcfx9	Bladder cancer	GPR171_ENSG00000174946	Inverse variance weighted	3	-0.00012794	0.000154435	0.407423	-0.000430632	0.000174753	0.999872	0.999569	1.00017
J10JDE	Plcfx9	Bladder cancer	GPR171_ENSG00000174946	Simple mode	3	-0.000116222	0.000206995	0.630997	-0.000521933	0.000289488	0.999884	0.999478	1.00029
J10JDE	Plcfx9	Bladder cancer	GPR171_ENSG00000174946	Weighted mode	3	-0.000111743	0.000207025	0.643422	-0.000517511	0.000294025	0.999888	0.999483	1.00029
J2ztny	Plcfx9	Bladder cancer	LINC01182_ENSG00000250634	Inverse variance weighted	2	-0.000114312	0.000192547	0.552724	-0.000491704	0.00026308	0.999886	0.999508	1.00026
J4aq7C	Plcfx9	Bladder cancer	FAS_ENSG00000026103	Wald ratio	1	4.45091e-05	0.000160809	0.781946	-0.000270676	0.000359694	1.00004	0.999729	1.00036
J8vGTi	Plcfx9	Bladder cancer	KNOP1_ENSG00000103550	Wald ratio	1	-6.90998e-05	0.000240803	0.774146	-0.000541073	0.000402873	0.999931	0.999459	1.0004
jACDPo	Plcfx9	Bladder cancer	RGR_ENSG00000148604	Wald ratio	1	-0.00025256	0.000174156	0.147003	-0.000593905	8.8785e-05	0.999747	0.999406	1.00009
JAH1Sd	Plcfx9	Bladder cancer	CCDC82_ENSG00000149231	Wald ratio	1	-0.000483096	0.000300647	0.108086	-0.00107236	0.000106171	0.999517	0.998928	1.00011
Je9Gm6	Plcfx9	Bladder cancer	HLA-DOB_ENSG00000241106	Wald ratio	1	-0.00040323	0.000276972	0.145434	-0.000946094	0.000139635	0.999597	0.999054	1.00014
jHmKZB	Plcfx9	Bladder cancer	ZBTB32_ENSG00000011590	Wald ratio	1	-0.000266675	0.000416715	0.522208	-0.00108344	0.000550087	0.999733	0.998917	1.00055
jIGbRm	Plcfx9	Bladder cancer	TBC1D3D_ENSG00000274419	Wald ratio	1	0.000240244	0.000262653	0.360359	-0.000274556	0.000755044	1.00024	0.999725	1.00076
JPQC2i	Plcfx9	Bladder cancer	ZNF718_ENSG00000250312	Wald ratio	1	0.000552348	0.000313004	0.0776196	-6.11397e-05	0.00116584	1.00055	0.999939	1.00117
jSKtia	Plcfx9	Bladder cancer	MAPT_ENSG00000186868	MR Egger	9	-0.000508186	0.00113937	0.669051	-0.00274136	0.00172499	0.999492	0.997262	1.00173
jSKtia	Plcfx9	Bladder cancer	MAPT_ENSG00000186868	Weighted median	9	0.000170751	0.000136185	0.209908	-9.61716e-05	0.000437674	1.00017	0.999904	1.00044
jSKtia	Plcfx9	Bladder cancer	MAPT_ENSG00000186868	Inverse variance weighted	9	0.000214791	0.000113178	0.0577193	-7.03701e-06	0.00043662	1.00021	0.999993	1.00044
jSKtia	Plcfx9	Bladder cancer	MAPT_ENSG00000186868	Simple mode	9	0.00015426	0.000201178	0.465233	-0.000240048	0.000548568	1.00015	0.99976	1.00055
jSKtia	Plcfx9	Bladder cancer	MAPT_ENSG00000186868	Weighted mode	9	0.000155456	0.000196037	0.450657	-0.000228776	0.000539688	1.00016	0.999771	1.00054
jt80H6	Plcfx9	Bladder cancer	MIR4713HG_ENSG00000259240	MR Egger	3	0.00240282	0.00950353	0.842344	-0.0162241	0.0210297	1.00241	0.983907	1.02125
jt80H6	Plcfx9	Bladder cancer	MIR4713HG_ENSG00000259240	Weighted median	3	0.00013781	0.00018374	0.45324	-0.000222321	0.00049794	1.00014	0.999778	1.0005
jt80H6	Plcfx9	Bladder cancer	MIR4713HG_ENSG00000259240	Inverse variance weighted	3	0.000160139	0.000165899	0.334405	-0.000165024	0.000485302	1.00016	0.999835	1.00049
jt80H6	Plcfx9	Bladder cancer	MIR4713HG_ENSG00000259240	Simple mode	3	0.000130244	0.000229522	0.627606	-0.000319619	0.000580108	1.00013	0.99968	1.00058
jt80H6	Plcfx9	Bladder cancer	MIR4713HG_ENSG00000259240	Weighted mode	3	0.000130244	0.000222647	0.617765	-0.000306144	0.000566633	1.00013	0.999694	1.00057
juxLuu	Plcfx9	Bladder cancer	METTL14-DT_ENSG00000281731	Wald ratio	1	-0.000125449	0.000332489	0.705949	-0.000777127	0.000526229	0.999875	0.999223	1.00053
jxPIv0	Plcfx9	Bladder cancer	AL391095.1_ENSG00000224635	Wald ratio	1	-4.2782e-05	0.000264673	0.871588	-0.00056154	0.000475976	0.999957	0.999439	1.00048
K5wELO	Plcfx9	Bladder cancer	C17orf97_ENSG00000187624	Wald ratio	1	-0.000308272	0.000355851	0.386327	-0.00100574	0.000389195	0.999692	0.998995	1.00039
KBM1tn	Plcfx9	Bladder cancer	FLYWCH1_ENSG00000059122	Wald ratio	1	0.000482574	0.000273679	0.0778531	-5.3838e-05	0.00101899	1.00048	0.999946	1.00102
KctHTH	Plcfx9	Bladder cancer	LACTB2_ENSG00000147592	MR Egger	3	-0.000109985	0.0105652	0.993373	-0.0208179	0.0205979	0.99989	0.979397	1.02081
KctHTH	Plcfx9	Bladder cancer	LACTB2_ENSG00000147592	Weighted median	3	-0.00049669	0.000279155	0.0751968	-0.00104383	5.04539e-05	0.999503	0.998957	1.00005
KctHTH	Plcfx9	Bladder cancer	LACTB2_ENSG00000147592	Inverse variance weighted	3	-0.000499641	0.000226123	0.0271327	-0.000942842	-5.6441e-05	0.9995	0.999058	0.999944
KctHTH	Plcfx9	Bladder cancer	LACTB2_ENSG00000147592	Simple mode	3	-0.000493743	0.000311315	0.253629	-0.00110392	0.000116434	0.999506	0.998897	1.00012
KctHTH	Plcfx9	Bladder cancer	LACTB2_ENSG00000147592	Weighted mode	3	-0.000492967	0.000309169	0.251866	-0.00109894	0.000113004	0.999507	0.998902	1.00011
khLYDW	Plcfx9	Bladder cancer	XYLT2_ENSG00000015532	Inverse variance weighted	2	2.29291e-05	0.000234192	0.922006	-0.000436087	0.000481946	1.00002	0.999564	1.00048
kMnQmT	Plcfx9	Bladder cancer	SPX_ENSG00000134548	Wald ratio	1	0.000140457	0.00023958	0.557698	-0.000329119	0.000610033	1.00014	0.999671	1.00061
KXndFz	Plcfx9	Bladder cancer	AC011462.2_ENSG00000255730	Wald ratio	1	-0.000288921	0.000373894	0.439679	-0.00102175	0.000443911	0.999711	0.998979	1.00044
kYu6Ti	Plcfx9	Bladder cancer	GTF2H2_ENSG00000145736	Wald ratio	1	2.29563e-05	0.000278319	0.934264	-0.00052255	0.000568462	1.00002	0.999478	1.00057
L0vbUA	Plcfx9	Bladder cancer	KCNE4_ENSG00000152049	Wald ratio	1	0.000387401	0.000330998	0.241839	-0.000261355	0.00103616	1.00039	0.999739	1.00104
L6Vtxe	Plcfx9	Bladder cancer	ZNF534_ENSG00000198633	Wald ratio	1	0.000235736	0.000264984	0.373667	-0.000283632	0.000755104	1.00024	0.999716	1.00076
L7Exb7	Plcfx9	Bladder cancer	AC090825.1_ENSG00000259363	Wald ratio	1	0.000148151	0.000201791	0.462839	-0.00024736	0.000543662	1.00015	0.999753	1.00054
LAP8hE	Plcfx9	Bladder cancer	PKD2_ENSG00000118762	Wald ratio	1	0.000219729	0.000291865	0.451543	-0.000352326	0.000791785	1.00022	0.999648	1.00079
Le8H5j	Plcfx9	Bladder cancer	RELL1_ENSG00000181826	Wald ratio	1	0.000304853	0.000309083	0.32398	-0.00030095	0.000910656	1.0003	0.999699	1.00091
lf5r6j	Plcfx9	Bladder cancer	AC092902.2_ENSG00000272840	Wald ratio	1	0.000390932	0.000218971	0.0742106	-3.82515e-05	0.000820115	1.00039	0.999962	1.00082
lfkPgU	Plcfx9	Bladder cancer	AC008467.1_ENSG00000249476	Wald ratio	1	0.000339046	0.000220712	0.124502	-9.35495e-05	0.000771642	1.00034	0.999906	1.00077
LGFpyp	Plcfx9	Bladder cancer	SF3B2_ENSG00000087365	Wald ratio	1	0.000260236	0.00055361	0.638304	-0.00082484	0.00134531	1.00026	0.999176	1.00135
LhbYv7	Plcfx9	Bladder cancer	ERGIC3_ENSG00000125991	Wald ratio	1	0.000504116	0.000290227	0.0823927	-6.47298e-05	0.00107296	1.0005	0.999935	1.00107
LHv00c	Plcfx9	Bladder cancer	SNORC_ENSG00000182600	Inverse variance weighted	2	-8.88546e-05	0.000152572	0.560312	-0.000387896	0.000210186	0.999911	0.999612	1.00021
LljTYK	Plcfx9	Bladder cancer	KLHL32_ENSG00000186231	Wald ratio	1	0.000193892	0.000302278	0.52124	-0.000398574	0.000786357	1.00019	0.999602	1.00079
LrBeFj	Plcfx9	Bladder cancer	MGAM_ENSG00000257335	Wald ratio	1	-5.41034e-05	0.00027953	0.846527	-0.000601982	0.000493775	0.999946	0.999398	1.00049
LSH04B	Plcfx9	Bladder cancer	ALDH7A1_ENSG00000164904	Wald ratio	1	0.000155315	0.000355689	0.662358	-0.000541835	0.000852466	1.00016	0.999458	1.00085
lTZFiO	Plcfx9	Bladder cancer	AC244131.2_ENSG00000275119	MR Egger	3	-0.000498581	0.00978993	0.967606	-0.0196868	0.0186897	0.999502	0.980506	1.01887
lTZFiO	Plcfx9	Bladder cancer	AC244131.2_ENSG00000275119	Weighted median	3	0.000258141	0.000119866	0.0312727	2.32042e-05	0.000493079	1.00026	1.00002	1.00049
lTZFiO	Plcfx9	Bladder cancer	AC244131.2_ENSG00000275119	Inverse variance weighted	3	0.000257752	9.91079e-05	0.00930294	6.35e-05	0.000452003	1.00026	1.00006	1.00045
lTZFiO	Plcfx9	Bladder cancer	AC244131.2_ENSG00000275119	Simple mode	3	0.000259846	0.000131562	0.186937	1.98401e-06	0.000517707	1.00026	1	1.00052
lTZFiO	Plcfx9	Bladder cancer	AC244131.2_ENSG00000275119	Weighted mode	3	0.000259519	0.000131046	0.186202	2.66894e-06	0.000516369	1.00026	1	1.00052
lxMY9F	Plcfx9	Bladder cancer	FAM66A_ENSG00000227888	Inverse variance weighted	2	-3.00934e-05	0.000176521	0.864632	-0.000376074	0.000315887	0.99997	0.999624	1.00032
LZcz6A	Plcfx9	Bladder cancer	CYP4V2_ENSG00000145476	Wald ratio	1	0.000346792	0.000415264	0.403654	-0.000467125	0.00116071	1.00035	0.999533	1.00116
lZlXlb	Plcfx9	Bladder cancer	ANKRD36B_ENSG00000196912	MR Egger	9	-0.00114715	0.00116021	0.355728	-0.00342116	0.00112687	0.998854	0.996585	1.00113
lZlXlb	Plcfx9	Bladder cancer	ANKRD36B_ENSG00000196912	Weighted median	9	-0.000337005	0.000117841	0.00423883	-0.000567974	-0.000106036	0.999663	0.999432	0.999894
lZlXlb	Plcfx9	Bladder cancer	ANKRD36B_ENSG00000196912	Inverse variance weighted	9	-0.0003437	9.51667e-05	0.000304364	-0.000530227	-0.000157173	0.999656	0.99947	0.999843
lZlXlb	Plcfx9	Bladder cancer	ANKRD36B_ENSG00000196912	Simple mode	9	-0.000306344	0.000163607	0.0980386	-0.000627014	1.43254e-05	0.999694	0.999373	1.00001
lZlXlb	Plcfx9	Bladder cancer	ANKRD36B_ENSG00000196912	Weighted mode	9	-0.00034833	0.000167994	0.0718403	-0.000677597	-1.90627e-05	0.999652	0.999323	0.999981
m01DLj	Plcfx9	Bladder cancer	LINC00665_ENSG00000232677	Wald ratio	1	-0.000120863	0.000334554	0.717902	-0.000776589	0.000534864	0.999879	0.999224	1.00054
M4rYDL	Plcfx9	Bladder cancer	GSTM5_ENSG00000134201	Wald ratio	1	0.000139243	0.000184197	0.449681	-0.000221783	0.00050027	1.00014	0.999778	1.0005
Mg7vQ6	Plcfx9	Bladder cancer	RNF149_ENSG00000163162	Wald ratio	1	0.000380304	0.00034932	0.276287	-0.000304363	0.00106497	1.00038	0.999696	1.00107
MHA53z	Plcfx9	Bladder cancer	MAEL_ENSG00000143194	Wald ratio	1	-0.000381277	0.000306018	0.21279	-0.000981073	0.000218518	0.999619	0.999019	1.00022
MNIZJR	Plcfx9	Bladder cancer	NUPL2_ENSG00000136243	Inverse variance weighted	2	-0.000257254	0.000224157	0.251111	-0.000696601	0.000182093	0.999743	0.999304	1.00018
MnwfcQ	Plcfx9	Bladder cancer	SLC15A2_ENSG00000163406	Wald ratio	1	0.000776909	0.000447167	0.0823158	-9.95374e-05	0.00165336	1.00078	0.9999	1.00165
mOK9RQ	Plcfx9	Bladder cancer	SHISA4_ENSG00000198892	Wald ratio	1	0.000599587	0.000403474	0.137263	-0.000191222	0.0013904	1.0006	0.999809	1.00139
mSQqVe	Plcfx9	Bladder cancer	FOXN2_ENSG00000170802	Wald ratio	1	-0.000636603	0.000338413	0.0599528	-0.00129989	2.6687e-05	0.999364	0.998701	1.00003
mwO7U5	Plcfx9	Bladder cancer	AXDND1_ENSG00000162779	Inverse variance weighted	2	-0.000327636	0.000269896	0.224772	-0.000856632	0.00020136	0.999672	0.999144	1.0002
mXOz5C	Plcfx9	Bladder cancer	POLR1A_ENSG00000068654	Inverse variance weighted	2	0.000138987	0.000228143	0.542386	-0.000308174	0.000586147	1.00014	0.999692	1.00059
mzTWEh	Plcfx9	Bladder cancer	FASTKD1_ENSG00000138399	Wald ratio	1	5.44825e-05	0.000552619	0.921464	-0.00102865	0.00113762	1.00005	0.998972	1.00114
NfG31A	Plcfx9	Bladder cancer	SYNM_ENSG00000182253	Wald ratio	1	-0.000285986	0.000517598	0.580589	-0.00130048	0.000728507	0.999714	0.9987	1.00073
nizIjI	Plcfx9	Bladder cancer	SFXN4_ENSG00000183605	Wald ratio	1	7.28051e-05	0.00022767	0.749132	-0.000373428	0.000519038	1.00007	0.999627	1.00052
NJot9U	Plcfx9	Bladder cancer	LRRC37A_ENSG00000176681	MR Egger	5	-0.000442188	0.00306324	0.894374	-0.00644615	0.00556177	0.999558	0.993575	1.00558
NJot9U	Plcfx9	Bladder cancer	LRRC37A_ENSG00000176681	Weighted median	5	8.83119e-05	0.000126916	0.486536	-0.000160444	0.000337067	1.00009	0.99984	1.00034
NJot9U	Plcfx9	Bladder cancer	LRRC37A_ENSG00000176681	Inverse variance weighted	5	0.000107513	0.000104931	0.30555	-9.81523e-05	0.000313179	1.00011	0.999902	1.00031
NJot9U	Plcfx9	Bladder cancer	LRRC37A_ENSG00000176681	Simple mode	5	8.70516e-05	0.000148741	0.589801	-0.000204481	0.000378584	1.00009	0.999796	1.00038
NJot9U	Plcfx9	Bladder cancer	LRRC37A_ENSG00000176681	Weighted mode	5	8.70516e-05	0.000169588	0.634783	-0.00024534	0.000419444	1.00009	0.999755	1.00042
NOCJoX	Plcfx9	Bladder cancer	ZNF100_ENSG00000197020	Inverse variance weighted	2	0.00021653	0.000154817	0.161929	-8.69124e-05	0.000519972	1.00022	0.999913	1.00052
NOIW5H	Plcfx9	Bladder cancer	MTRF1L_ENSG00000112031	Wald ratio	1	0.000256964	0.000289182	0.374223	-0.000309832	0.00082376	1.00026	0.99969	1.00082
nOue3a	Plcfx9	Bladder cancer	TESK2_ENSG00000070759	Inverse variance weighted	2	8.65968e-05	0.00016412	0.597747	-0.000235078	0.000408272	1.00009	0.999765	1.00041
nQnoMJ	Plcfx9	Bladder cancer	TRMT9B_ENSG00000250305	Wald ratio	1	-0.000298188	0.000229065	0.192997	-0.000747156	0.000150779	0.999702	0.999253	1.00015
nT5eEG	Plcfx9	Bladder cancer	OXTR_ENSG00000180914	Wald ratio	1	0.000129774	0.000281153	0.644385	-0.000421286	0.000680833	1.00013	0.999579	1.00068
nvjgwK	Plcfx9	Bladder cancer	FBXO7_ENSG00000100225	Wald ratio	1	-2.12126e-05	0.000350154	0.951693	-0.000707515	0.00066509	0.999979	0.999293	1.00067
nXkWo8	Plcfx9	Bladder cancer	ATG7_ENSG00000197548	MR Egger	3	-0.00376959	0.00741522	0.70059	-0.0183034	0.0107642	0.996238	0.981863	1.01082
nXkWo8	Plcfx9	Bladder cancer	ATG7_ENSG00000197548	Weighted median	3	-0.000377843	0.00026752	0.157835	-0.000902183	0.000146496	0.999622	0.999098	1.00015
nXkWo8	Plcfx9	Bladder cancer	ATG7_ENSG00000197548	Inverse variance weighted	3	-0.000388048	0.000223815	0.0829556	-0.000826726	5.06295e-05	0.999612	0.999174	1.00005
nXkWo8	Plcfx9	Bladder cancer	ATG7_ENSG00000197548	Simple mode	3	-0.000346613	0.000303484	0.371709	-0.000941442	0.000248216	0.999653	0.999059	1.00025
nXkWo8	Plcfx9	Bladder cancer	ATG7_ENSG00000197548	Weighted mode	3	-0.000354359	0.000310718	0.372262	-0.000963365	0.000254648	0.999646	0.999037	1.00025
NxWFKY	Plcfx9	Bladder cancer	AC022294.1_ENSG00000241231	Inverse variance weighted	2	-0.000137296	0.000175343	0.433618	-0.000480968	0.000206376	0.999863	0.999519	1.00021
nz5BLR	Plcfx9	Bladder cancer	BTRC_ENSG00000166167	Wald ratio	1	0.000959852	0.000616574	0.11953	-0.000248633	0.00216834	1.00096	0.999751	1.00217
nz7PI6	Plcfx9	Bladder cancer	LINC02256_ENSG00000261064	Wald ratio	1	4.26275e-05	0.000534376	0.93642	-0.00100475	0.00109	1.00004	0.998996	1.00109
o2cnjl	Plcfx9	Bladder cancer	PDPK1_ENSG00000140992	Wald ratio	1	-0.000215621	0.000310539	0.487466	-0.000824276	0.000393035	0.999784	0.999176	1.00039
O7p91v	Plcfx9	Bladder cancer	KANSL1_ENSG00000120071	MR Egger	7	-0.00060425	0.00121843	0.640974	-0.00299237	0.00178387	0.999396	0.997012	1.00179
O7p91v	Plcfx9	Bladder cancer	KANSL1_ENSG00000120071	Weighted median	7	6.98147e-05	6.08434e-05	0.251196	-4.94384e-05	0.000189068	1.00007	0.999951	1.00019
O7p91v	Plcfx9	Bladder cancer	KANSL1_ENSG00000120071	Inverse variance weighted	7	7.98396e-05	5.2119e-05	0.125554	-2.23137e-05	0.000181993	1.00008	0.999978	1.00018
O7p91v	Plcfx9	Bladder cancer	KANSL1_ENSG00000120071	Simple mode	7	6.96339e-05	9.06193e-05	0.471389	-0.00010798	0.000247248	1.00007	0.999892	1.00025
O7p91v	Plcfx9	Bladder cancer	KANSL1_ENSG00000120071	Weighted mode	7	6.96339e-05	8.2944e-05	0.433343	-9.29363e-05	0.000232204	1.00007	0.999907	1.00023
OaRXa9	Plcfx9	Bladder cancer	ANXA5_ENSG00000164111	Wald ratio	1	0.000787308	0.000449102	0.0795898	-9.29323e-05	0.00166755	1.00079	0.999907	1.00167
oBcuif	Plcfx9	Bladder cancer	LINC01954_ENSG00000271952	Wald ratio	1	9.59087e-05	0.000199632	0.630924	-0.00029537	0.000487188	1.0001	0.999705	1.00049
OeQmJD	Plcfx9	Bladder cancer	CD38_ENSG00000004468	Wald ratio	1	0.000603582	0.000406922	0.137998	-0.000193985	0.00140115	1.0006	0.999806	1.0014
OGTm1N	Plcfx9	Bladder cancer	INPP1_ENSG00000151689	Wald ratio	1	-0.000197671	0.000370105	0.593275	-0.000923076	0.000527734	0.999802	0.999077	1.00053
OgwS1O	Plcfx9	Bladder cancer	SLC13A4_ENSG00000164707	Wald ratio	1	0.000882108	0.000460427	0.0553848	-2.033e-05	0.00178455	1.00088	0.99998	1.00179
oHXqX9	Plcfx9	Bladder cancer	ALG8_ENSG00000159063	Wald ratio	1	-0.000141046	0.000316326	0.655678	-0.000761046	0.000478954	0.999859	0.999239	1.00048
oj6TTU	Plcfx9	Bladder cancer	STK38L_ENSG00000211455	Wald ratio	1	-0.00010388	0.000325276	0.749455	-0.000741421	0.000533662	0.999896	0.999259	1.00053
OjX1m8	Plcfx9	Bladder cancer	AC009120.4_ENSG00000261248	Inverse variance weighted	2	2.98866e-05	0.000406178	0.941344	-0.000766222	0.000825995	1.00003	0.999234	1.00083
olQ47s	Plcfx9	Bladder cancer	LLGL1_ENSG00000131899	Wald ratio	1	-0.000552712	0.000401543	0.168677	-0.00133974	0.000234313	0.999447	0.998661	1.00023
OnXM2U	Plcfx9	Bladder cancer	ZSCAN31_ENSG00000235109	MR Egger	3	0.00117191	0.00316252	0.774081	-0.00502663	0.00737045	1.00117	0.994986	1.0074
OnXM2U	Plcfx9	Bladder cancer	ZSCAN31_ENSG00000235109	Weighted median	3	0.000158136	0.000217032	0.466226	-0.000267246	0.000583518	1.00016	0.999733	1.00058
OnXM2U	Plcfx9	Bladder cancer	ZSCAN31_ENSG00000235109	Inverse variance weighted	3	0.000139577	0.000186384	0.453937	-0.000225736	0.00050489	1.00014	0.999774	1.00051
OnXM2U	Plcfx9	Bladder cancer	ZSCAN31_ENSG00000235109	Simple mode	3	0.000175325	0.000247789	0.552559	-0.000310342	0.000660992	1.00018	0.99969	1.00066
OnXM2U	Plcfx9	Bladder cancer	ZSCAN31_ENSG00000235109	Weighted mode	3	0.000176249	0.000249083	0.55254	-0.000311953	0.000664451	1.00018	0.999688	1.00066
p70lBR	Plcfx9	Bladder cancer	GLIPR1L2_ENSG00000180481	MR Egger	3	0.000229933	0.000936895	0.846789	-0.00160638	0.00206625	1.00023	0.998395	1.00207
p70lBR	Plcfx9	Bladder cancer	GLIPR1L2_ENSG00000180481	Weighted median	3	0.000228449	0.00011452	0.04606	3.99022e-06	0.000452907	1.00023	1	1.00045
p70lBR	Plcfx9	Bladder cancer	GLIPR1L2_ENSG00000180481	Inverse variance weighted	3	0.000226193	0.000101762	0.0262326	2.67382e-05	0.000425647	1.00023	1.00003	1.00043
p70lBR	Plcfx9	Bladder cancer	GLIPR1L2_ENSG00000180481	Simple mode	3	0.00023031	0.000135838	0.232071	-3.59315e-05	0.000496552	1.00023	0.999964	1.0005
p70lBR	Plcfx9	Bladder cancer	GLIPR1L2_ENSG00000180481	Weighted mode	3	0.000231673	0.000140547	0.241046	-4.37995e-05	0.000507145	1.00023	0.999956	1.00051
PaoY6n	Plcfx9	Bladder cancer	RNF8_ENSG00000112130	Wald ratio	1	0.000149163	0.00027479	0.58725	-0.000389426	0.000687752	1.00015	0.999611	1.00069
PfVAeK	Plcfx9	Bladder cancer	TMX1_ENSG00000139921	Wald ratio	1	-0.000395799	0.000419464	0.345383	-0.00121795	0.00042635	0.999604	0.998783	1.00043
PHZPZx	Plcfx9	Bladder cancer	MMD2_ENSG00000136297	Wald ratio	1	-0.000155404	0.000646266	0.809971	-0.00142209	0.00111128	0.999845	0.998579	1.00111
PiuR4R	Plcfx9	Bladder cancer	CCDC88C_ENSG00000015133	Inverse variance weighted	2	0.000278713	0.000215839	0.196599	-0.000144332	0.000701758	1.00028	0.999856	1.0007
PkCcbH	Plcfx9	Bladder cancer	CES1_ENSG00000198848	Wald ratio	1	0.000973597	0.000549524	0.0764427	-0.00010347	0.00205066	1.00097	0.999897	1.00205
pPeEKT	Plcfx9	Bladder cancer	NEDD4_ENSG00000069869	Wald ratio	1	-0.000325177	0.000398516	0.414518	-0.00110627	0.000455915	0.999675	0.998894	1.00046
Pq9krj	Plcfx9	Bladder cancer	AC090360.1_ENSG00000267127	Wald ratio	1	-0.000440078	0.000323119	0.173207	-0.00107339	0.000193235	0.99956	0.998927	1.00019
prdkMX	Plcfx9	Bladder cancer	HLA-DMA_ENSG00000204257	MR Egger	7	4.99581e-05	0.000286295	0.868319	-0.000511181	0.000611097	1.00005	0.999489	1.00061
prdkMX	Plcfx9	Bladder cancer	HLA-DMA_ENSG00000204257	Weighted median	7	8.80544e-05	0.000115849	0.447206	-0.000139009	0.000315118	1.00009	0.999861	1.00032
prdkMX	Plcfx9	Bladder cancer	HLA-DMA_ENSG00000204257	Inverse variance weighted	7	7.95003e-05	9.68734e-05	0.411839	-0.000110371	0.000269372	1.00008	0.99989	1.00027
prdkMX	Plcfx9	Bladder cancer	HLA-DMA_ENSG00000204257	Simple mode	7	0.000127684	0.000152465	0.434415	-0.000171148	0.000426516	1.00013	0.999829	1.00043
prdkMX	Plcfx9	Bladder cancer	HLA-DMA_ENSG00000204257	Weighted mode	7	0.000123126	0.000167942	0.49111	-0.00020604	0.000452292	1.00012	0.999794	1.00045
PwXJBB	Plcfx9	Bladder cancer	PXYLP1_ENSG00000155893	Wald ratio	1	-9.85678e-05	0.000234435	0.674158	-0.00055806	0.000360925	0.999901	0.999442	1.00036
PZsmBv	Plcfx9	Bladder cancer	SNX31_ENSG00000174226	Wald ratio	1	-0.000157209	0.000178164	0.377568	-0.00050641	0.000191992	0.999843	0.999494	1.00019
pzsxkz	Plcfx9	Bladder cancer	GAS8_ENSG00000141013	MR Egger	4	-0.000218935	0.000380675	0.623286	-0.000965059	0.000527188	0.999781	0.999035	1.00053
pzsxkz	Plcfx9	Bladder cancer	GAS8_ENSG00000141013	Weighted median	4	-0.000110455	0.000167746	0.510236	-0.000439237	0.000218326	0.99989	0.999561	1.00022
pzsxkz	Plcfx9	Bladder cancer	GAS8_ENSG00000141013	Inverse variance weighted	4	-0.000114033	0.000146514	0.436388	-0.000401201	0.000173135	0.999886	0.999599	1.00017
pzsxkz	Plcfx9	Bladder cancer	GAS8_ENSG00000141013	Simple mode	4	-0.000110428	0.000225385	0.657761	-0.000552183	0.000331327	0.99989	0.999448	1.00033
pzsxkz	Plcfx9	Bladder cancer	GAS8_ENSG00000141013	Weighted mode	4	-0.000110428	0.000201959	0.622573	-0.000506268	0.000285412	0.99989	0.999494	1.00029
q3b4uA	Plcfx9	Bladder cancer	TAMM41_ENSG00000144559	Wald ratio	1	7.03696e-05	0.000246202	0.775016	-0.000412187	0.000552926	1.00007	0.999588	1.00055
Q4Hvx9	Plcfx9	Bladder cancer	CCDC32_ENSG00000128891	MR Egger	3	0.0008417	0.00195393	0.741055	-0.002988	0.0046714	1.00084	0.997016	1.00468
Q4Hvx9	Plcfx9	Bladder cancer	CCDC32_ENSG00000128891	Weighted median	3	-0.000220761	0.000176967	0.212224	-0.000567616	0.000126094	0.999779	0.999433	1.00013
Q4Hvx9	Plcfx9	Bladder cancer	CCDC32_ENSG00000128891	Inverse variance weighted	3	-0.000219077	0.000150257	0.144837	-0.000513581	7.54271e-05	0.999781	0.999487	1.00008
Q4Hvx9	Plcfx9	Bladder cancer	CCDC32_ENSG00000128891	Simple mode	3	-0.000267158	0.000219714	0.34805	-0.000697797	0.000163482	0.999733	0.999302	1.00016
Q4Hvx9	Plcfx9	Bladder cancer	CCDC32_ENSG00000128891	Weighted mode	3	-0.000230602	0.000222032	0.408078	-0.000665784	0.000204581	0.999769	0.999334	1.0002
Q4S3aK	Plcfx9	Bladder cancer	CCZ1_ENSG00000122674	Wald ratio	1	-6.23747e-05	0.000221919	0.778657	-0.000497335	0.000372586	0.999938	0.999503	1.00037
q85C0B	Plcfx9	Bladder cancer	SYNE1_ENSG00000131018	Wald ratio	1	0.00012412	0.000466064	0.789997	-0.000789366	0.00103761	1.00012	0.999211	1.00104
QbH2EL	Plcfx9	Bladder cancer	MARK1_ENSG00000116141	Inverse variance weighted	2	0.00023174	0.000234891	0.323846	-0.000228646	0.000692126	1.00023	0.999771	1.00069
QcocQP	Plcfx9	Bladder cancer	AEBP1_ENSG00000106624	Wald ratio	1	-5.43866e-05	0.000426681	0.898573	-0.000890682	0.000781909	0.999946	0.99911	1.00078
QfY3tn	Plcfx9	Bladder cancer	AC116366.3_ENSG00000283782	Wald ratio	1	0.000350913	0.000623276	0.573425	-0.000870707	0.00157253	1.00035	0.99913	1.00157
qlq0i5	Plcfx9	Bladder cancer	TRIM66_ENSG00000166436	Inverse variance weighted	2	-0.000357475	0.000282643	0.205958	-0.000911454	0.000196505	0.999643	0.999089	1.0002
qsgIws	Plcfx9	Bladder cancer	SPECC1_ENSG00000128487	Wald ratio	1	-0.00093683	0.00058464	0.109066	-0.00208272	0.000209064	0.999064	0.997919	1.00021
qsH627	Plcfx9	Bladder cancer	AC093151.3_ENSG00000235358	MR Egger	3	-0.00936609	0.0923673	0.935666	-0.190406	0.171674	0.990678	0.826623	1.18729
qsH627	Plcfx9	Bladder cancer	AC093151.3_ENSG00000235358	Weighted median	3	-5.93779e-06	0.000122211	0.961249	-0.000245472	0.000233597	0.999994	0.999755	1.00023
qsH627	Plcfx9	Bladder cancer	AC093151.3_ENSG00000235358	Inverse variance weighted	3	-1.28872e-06	0.00010842	0.990516	-0.000213792	0.000211215	0.999999	0.999786	1.00021
qsH627	Plcfx9	Bladder cancer	AC093151.3_ENSG00000235358	Simple mode	3	-1.02663e-05	0.000148377	0.951133	-0.000301086	0.000280553	0.99999	0.999699	1.00028
qsH627	Plcfx9	Bladder cancer	AC093151.3_ENSG00000235358	Weighted mode	3	-1.06728e-05	0.00013712	0.945045	-0.000279429	0.000258083	0.999989	0.999721	1.00026
QWoLXi	Plcfx9	Bladder cancer	WDSUB1_ENSG00000196151	Wald ratio	1	-0.00038301	0.000323207	0.236006	-0.0010165	0.000250476	0.999617	0.998984	1.00025
Qxspc2	Plcfx9	Bladder cancer	CHRFAM7A_ENSG00000166664	Inverse variance weighted	2	0.000502309	0.000287881	0.081011	-6.19375e-05	0.00106655	1.0005	0.999938	1.00107
QZCsOV	Plcfx9	Bladder cancer	INVS_ENSG00000119509	Inverse variance weighted	2	4.38392e-05	0.000254798	0.863394	-0.000455564	0.000543243	1.00004	0.999545	1.00054
R1RkHu	Plcfx9	Bladder cancer	ERICH1_ENSG00000104714	Wald ratio	1	-0.000306618	0.000391425	0.433428	-0.00107381	0.000460574	0.999693	0.998927	1.00046
r4WM7X	Plcfx9	Bladder cancer	TNFRSF11B_ENSG00000164761	Wald ratio	1	-0.000346257	0.000315492	0.272416	-0.000964621	0.000272107	0.999654	0.999036	1.00027
Rbf2lY	Plcfx9	Bladder cancer	ECM2_ENSG00000106823	MR Egger	6	0.00167174	0.00306955	0.614954	-0.00434457	0.00768806	1.00167	0.995665	1.00772
Rbf2lY	Plcfx9	Bladder cancer	ECM2_ENSG00000106823	Weighted median	6	0.000334862	0.000197168	0.0894401	-5.15874e-05	0.000721312	1.00033	0.999948	1.00072
Rbf2lY	Plcfx9	Bladder cancer	ECM2_ENSG00000106823	Inverse variance weighted	6	0.000318919	0.00016636	0.0552324	-7.14618e-06	0.000644985	1.00032	0.999993	1.00065
Rbf2lY	Plcfx9	Bladder cancer	ECM2_ENSG00000106823	Simple mode	6	0.000363698	0.000270316	0.23627	-0.00016612	0.000893517	1.00036	0.999834	1.00089
Rbf2lY	Plcfx9	Bladder cancer	ECM2_ENSG00000106823	Weighted mode	6	0.000363698	0.000268945	0.234218	-0.000163433	0.00089083	1.00036	0.999837	1.00089
rdpsBs	Plcfx9	Bladder cancer	DIAPH3_ENSG00000139734	Wald ratio	1	0.000433453	0.000508442	0.39393	-0.000563094	0.00143	1.00043	0.999437	1.00143
ReveBO	Plcfx9	Bladder cancer	CLIP4_ENSG00000115295	Wald ratio	1	0.000210474	0.000494772	0.670548	-0.000759279	0.00118023	1.00021	0.999241	1.00118
RHQO6M	Plcfx9	Bladder cancer	C12orf60_ENSG00000182993	Wald ratio	1	0.000305905	0.000263077	0.244912	-0.000209726	0.000821535	1.00031	0.99979	1.00082
rlaPYi	Plcfx9	Bladder cancer	TXNDC15_ENSG00000113621	MR Egger	3	0.000960399	0.00232808	0.750916	-0.00360264	0.00552344	1.00096	0.996404	1.00554
rlaPYi	Plcfx9	Bladder cancer	TXNDC15_ENSG00000113621	Weighted median	3	4.3551e-05	0.000202289	0.829541	-0.000352936	0.000440038	1.00004	0.999647	1.00044
rlaPYi	Plcfx9	Bladder cancer	TXNDC15_ENSG00000113621	Inverse variance weighted	3	6.06702e-05	0.000174455	0.728014	-0.000281262	0.000402603	1.00006	0.999719	1.0004
rlaPYi	Plcfx9	Bladder cancer	TXNDC15_ENSG00000113621	Simple mode	3	-1.55809e-06	0.000241393	0.995436	-0.000474688	0.000471571	0.999998	0.999525	1.00047
rlaPYi	Plcfx9	Bladder cancer	TXNDC15_ENSG00000113621	Weighted mode	3	-8.71124e-07	0.000236787	0.997399	-0.000464973	0.00046323	0.999999	0.999535	1.00046
Rovk9G	Plcfx9	Bladder cancer	PIF1_ENSG00000140451	Wald ratio	1	-0.00025992	0.000280191	0.353588	-0.000809093	0.000289254	0.99974	0.999191	1.00029
RPZgtZ	Plcfx9	Bladder cancer	LINC02506_ENSG00000251129	Inverse variance weighted	2	4.6249e-05	0.000149428	0.756936	-0.00024663	0.000339128	1.00005	0.999753	1.00034
rq99G7	Plcfx9	Bladder cancer	AL139352.1_ENSG00000132832	Wald ratio	1	-0.000234234	0.000359605	0.51481	-0.00093906	0.000470591	0.999766	0.999061	1.00047
rTcMBK	Plcfx9	Bladder cancer	PRSS55_ENSG00000184647	Wald ratio	1	0.000317911	0.000311588	0.30759	-0.000292802	0.000928624	1.00032	0.999707	1.00093
RWrjtQ	Plcfx9	Bladder cancer	FAM184B_ENSG00000047662	Wald ratio	1	7.38284e-05	0.000418765	0.860058	-0.000746951	0.000894608	1.00007	0.999253	1.0009
rXHe9f	Plcfx9	Bladder cancer	UST_ENSG00000111962	Wald ratio	1	7.56098e-05	0.000224017	0.735726	-0.000363463	0.000514682	1.00008	0.999637	1.00051
RZfYlB	Plcfx9	Bladder cancer	ARL17A_ENSG00000185829	Inverse variance weighted	2	4.39792e-05	0.000143144	0.758663	-0.000236584	0.000324542	1.00004	0.999763	1.00032
s5HP5k	Plcfx9	Bladder cancer	WDR97_ENSG00000179698	Wald ratio	1	0.000503484	0.000334952	0.132799	-0.000153021	0.00115999	1.0005	0.999847	1.00116
sFzitR	Plcfx9	Bladder cancer	C20orf194_ENSG00000088854	Wald ratio	1	-0.000186063	0.000396058	0.638507	-0.000962336	0.00059021	0.999814	0.999038	1.00059
sHPI2D	Plcfx9	Bladder cancer	NPIPA5_ENSG00000183793	Wald ratio	1	-9.66636e-05	0.00024104	0.688401	-0.000569103	0.000375775	0.999903	0.999431	1.00038
sjJT2S	Plcfx9	Bladder cancer	LRRC37A2_ENSG00000238083	MR Egger	7	0.000108454	0.00097424	0.915692	-0.00180106	0.00201796	1.00011	0.998201	1.00202
sjJT2S	Plcfx9	Bladder cancer	LRRC37A2_ENSG00000238083	Weighted median	7	7.09613e-05	6.23196e-05	0.254841	-5.1185e-05	0.000193108	1.00007	0.999949	1.00019
sjJT2S	Plcfx9	Bladder cancer	LRRC37A2_ENSG00000238083	Inverse variance weighted	7	7.2203e-05	5.1822e-05	0.163532	-2.9368e-05	0.000173774	1.00007	0.999971	1.00017
sjJT2S	Plcfx9	Bladder cancer	LRRC37A2_ENSG00000238083	Simple mode	7	7.02592e-05	8.6096e-05	0.445648	-9.84889e-05	0.000239007	1.00007	0.999902	1.00024
sjJT2S	Plcfx9	Bladder cancer	LRRC37A2_ENSG00000238083	Weighted mode	7	7.02592e-05	8.38747e-05	0.434309	-9.41352e-05	0.000234654	1.00007	0.999906	1.00023
skZmxh	Plcfx9	Bladder cancer	SCRG1_ENSG00000164106	Wald ratio	1	-8.43087e-05	0.000413091	0.838281	-0.000893967	0.000725349	0.999916	0.999106	1.00073
spw0f2	Plcfx9	Bladder cancer	ZNF98_ENSG00000197360	Wald ratio	1	0.000527272	0.000409474	0.197856	-0.000275296	0.00132984	1.00053	0.999725	1.00133
srtFeJ	Plcfx9	Bladder cancer	PCED1B_ENSG00000179715	Wald ratio	1	0.000404404	0.000381854	0.289574	-0.000344029	0.00115284	1.0004	0.999656	1.00115
sRxjOp	Plcfx9	Bladder cancer	AL590705.1_ENSG00000203279	Wald ratio	1	-2.78219e-05	0.000174925	0.873629	-0.000370675	0.000315031	0.999972	0.999629	1.00032
st9YLW	Plcfx9	Bladder cancer	AL445483.1_ENSG00000260088	Wald ratio	1	-5.11242e-05	0.000197261	0.795504	-0.000437756	0.000335508	0.999949	0.999562	1.00034
STVcVk	Plcfx9	Bladder cancer	AC009495.1_ENSG00000229195	Wald ratio	1	9.69642e-05	0.000358965	0.787066	-0.000606606	0.000800535	1.0001	0.999394	1.0008
sXlvfU	Plcfx9	Bladder cancer	LRP1B_ENSG00000168702	Inverse variance weighted	2	0.000294029	0.000278932	0.291826	-0.000252678	0.000840736	1.00029	0.999747	1.00084
SyiSRk	Plcfx9	Bladder cancer	APOLD1_ENSG00000178878	Wald ratio	1	-0.000292361	0.000220277	0.184429	-0.000724104	0.000139382	0.999708	0.999276	1.00014
SypUk4	Plcfx9	Bladder cancer	ACTA2_ENSG00000107796	Wald ratio	1	2.00869e-05	0.000296893	0.946059	-0.000561824	0.000601998	1.00002	0.999438	1.0006
t16exD	Plcfx9	Bladder cancer	SNX29_ENSG00000048471	Wald ratio	1	-1.34688e-05	0.000379649	0.971699	-0.000757581	0.000730643	0.999987	0.999243	1.00073
T2ZJpQ	Plcfx9	Bladder cancer	LINC01768_ENSG00000228420	Wald ratio	1	0.000376613	0.000246941	0.12723	-0.00010739	0.000860617	1.00038	0.999893	1.00086
T8danu	Plcfx9	Bladder cancer	ZNF208_ENSG00000160321	Wald ratio	1	-0.000167501	0.000205985	0.416119	-0.000571231	0.000236229	0.999833	0.999429	1.00024
T9QYCK	Plcfx9	Bladder cancer	GTF2H2C_ENSG00000183474	Wald ratio	1	0.000423898	0.0002842	0.135818	-0.000133134	0.00098093	1.00042	0.999867	1.00098
TaGuZM	Plcfx9	Bladder cancer	GFRA1_ENSG00000151892	Wald ratio	1	1.85862e-05	0.000305268	0.951451	-0.000579739	0.000616911	1.00002	0.99942	1.00062
tDR754	Plcfx9	Bladder cancer	AC124657.1_ENSG00000254532	Inverse variance weighted	2	0.000260508	0.000191635	0.174022	-0.000115097	0.000636113	1.00026	0.999885	1.00064
tFTsyC	Plcfx9	Bladder cancer	AP000350.6_ENSG00000273295	Wald ratio	1	0.000200764	0.000169657	0.236671	-0.000131764	0.000533292	1.0002	0.999868	1.00053
tGWjw5	Plcfx9	Bladder cancer	TSPAN11_ENSG00000110900	Wald ratio	1	-0.000447372	0.000280586	0.110842	-0.00099732	0.000102577	0.999553	0.999003	1.0001
Tmv0zP	Plcfx9	Bladder cancer	CA12_ENSG00000074410	Wald ratio	1	-0.000231519	0.000235384	0.325322	-0.000692871	0.000229833	0.999769	0.999307	1.00023
tT7URp	Plcfx9	Bladder cancer	OLFM2_ENSG00000105088	Wald ratio	1	-0.000530073	0.00048511	0.274531	-0.00148089	0.000420742	0.99947	0.99852	1.00042
U1UfrN	Plcfx9	Bladder cancer	TTC12_ENSG00000149292	Wald ratio	1	0.000341158	0.000278803	0.221083	-0.000205295	0.000887612	1.00034	0.999795	1.00089
U2ThR1	Plcfx9	Bladder cancer	ATP6AP1L_ENSG00000205464	MR Egger	3	0.00016326	0.0020163	0.948565	-0.00378868	0.0041152	1.00016	0.996218	1.00412
U2ThR1	Plcfx9	Bladder cancer	ATP6AP1L_ENSG00000205464	Weighted median	3	0.000170327	0.00021316	0.424256	-0.000247466	0.000588121	1.00017	0.999753	1.00059
U2ThR1	Plcfx9	Bladder cancer	ATP6AP1L_ENSG00000205464	Inverse variance weighted	3	0.000124515	0.000184838	0.500537	-0.000237768	0.000486799	1.00012	0.999762	1.00049
U2ThR1	Plcfx9	Bladder cancer	ATP6AP1L_ENSG00000205464	Simple mode	3	0.000197307	0.000261115	0.528739	-0.000314478	0.000709092	1.0002	0.999686	1.00071
U2ThR1	Plcfx9	Bladder cancer	ATP6AP1L_ENSG00000205464	Weighted mode	3	0.000196268	0.000247745	0.511276	-0.000289312	0.000681848	1.0002	0.999711	1.00068
UayChB	Plcfx9	Bladder cancer	SLC6A16_ENSG00000063127	Wald ratio	1	0.000147459	0.000347036	0.670903	-0.000532733	0.00082765	1.00015	0.999467	1.00083
UI9S2n	Plcfx9	Bladder cancer	RHBDL3_ENSG00000141314	Inverse variance weighted	2	0.000352873	0.000208584	0.0906928	-5.59517e-05	0.000761698	1.00035	0.999944	1.00076
uj0sA2	Plcfx9	Bladder cancer	TNS3_ENSG00000136205	Wald ratio	1	0.000127349	0.000439337	0.771919	-0.000733751	0.000988449	1.00013	0.999267	1.00099
URbinh	Plcfx9	Bladder cancer	RBAK-RBAKDN_ENSG00000272968	Wald ratio	1	-7.32652e-05	0.000369028	0.842626	-0.000796561	0.000650031	0.999927	0.999204	1.00065
uWLAkD	Plcfx9	Bladder cancer	COL6A2_ENSG00000142173	Wald ratio	1	-0.000120642	0.000347426	0.728407	-0.000801598	0.000560313	0.999879	0.999199	1.00056
Ux5kgQ	Plcfx9	Bladder cancer	FAM182B_ENSG00000175170	MR Egger	7	-0.000244742	0.00100915	0.818009	-0.00222267	0.00173319	0.999755	0.99778	1.00173
Ux5kgQ	Plcfx9	Bladder cancer	FAM182B_ENSG00000175170	Weighted median	7	-5.69716e-05	0.000120722	0.636982	-0.000293588	0.000179644	0.999943	0.999706	1.00018
Ux5kgQ	Plcfx9	Bladder cancer	FAM182B_ENSG00000175170	Inverse variance weighted	7	-5.36938e-05	0.000106187	0.613101	-0.000261821	0.000154433	0.999946	0.999738	1.00015
Ux5kgQ	Plcfx9	Bladder cancer	FAM182B_ENSG00000175170	Simple mode	7	-4.16245e-05	0.000176759	0.821662	-0.000388071	0.000304822	0.999958	0.999612	1.0003
Ux5kgQ	Plcfx9	Bladder cancer	FAM182B_ENSG00000175170	Weighted mode	7	-6.31408e-05	0.000177011	0.733521	-0.000410082	0.000283801	0.999937	0.99959	1.00028
UxY8c1	Plcfx9	Bladder cancer	TPSD1_ENSG00000095917	Wald ratio	1	6.83028e-05	0.000228904	0.765405	-0.000380348	0.000516954	1.00007	0.99962	1.00052
uyC9AW	Plcfx9	Bladder cancer	AP003071.2_ENSG00000261070	Wald ratio	1	0.000471304	0.000460633	0.30623	-0.000431537	0.00137415	1.00047	0.999569	1.00138
UyJbee	Plcfx9	Bladder cancer	CERS3_ENSG00000154227	Wald ratio	1	0.000178803	0.000260117	0.491835	-0.000331027	0.000688632	1.00018	0.999669	1.00069
v3YtzU	Plcfx9	Bladder cancer	RGPD8_ENSG00000169629	Wald ratio	1	-0.000270739	0.000423993	0.523117	-0.00110176	0.000560286	0.999729	0.998899	1.00056
v5OSqp	Plcfx9	Bladder cancer	LAP3_ENSG00000002549	Wald ratio	1	0.00010925	0.000310231	0.72472	-0.000498802	0.000717302	1.00011	0.999501	1.00072
v6Xzf1	Plcfx9	Bladder cancer	SYNRG_ENSG00000275066	Wald ratio	1	-6.30829e-05	0.000304113	0.835672	-0.000659144	0.000532978	0.999937	0.999341	1.00053
vdy2LE	Plcfx9	Bladder cancer	HSD17B13_ENSG00000170509	Wald ratio	1	8.97483e-05	0.000259773	0.729728	-0.000419407	0.000598904	1.00009	0.999581	1.0006
vDzZJk	Plcfx9	Bladder cancer	RHBDD1_ENSG00000144468	Inverse variance weighted	2	0.000213603	0.000292933	0.465886	-0.000360545	0.000787751	1.00021	0.99964	1.00079
vInqk8	Plcfx9	Bladder cancer	AF165147.1_ENSG00000232855	Wald ratio	1	6.16703e-05	0.000259898	0.812434	-0.000447729	0.000571069	1.00006	0.999552	1.00057
Vlm5NW	Plcfx9	Bladder cancer	PIGZ_ENSG00000119227	Wald ratio	1	7.2537e-05	0.000248612	0.770464	-0.000414743	0.000559817	1.00007	0.999585	1.00056
VlYggW	Plcfx9	Bladder cancer	SLC22A18_ENSG00000110628	Wald ratio	1	0.000128739	0.000268035	0.631008	-0.000396609	0.000654088	1.00013	0.999603	1.00065
VM35Dt	Plcfx9	Bladder cancer	PGM2_ENSG00000169299	Wald ratio	1	4.73791e-05	0.000266511	0.858899	-0.000474983	0.000569741	1.00005	0.999525	1.00057
vMOEUb	Plcfx9	Bladder cancer	CYP4F3_ENSG00000186529	Wald ratio	1	6.68644e-05	0.000457833	0.883885	-0.000830488	0.000964217	1.00007	0.99917	1.00096
Vn4QeS	Plcfx9	Bladder cancer	NAPG_ENSG00000134265	Wald ratio	1	-0.000378218	0.000277487	0.172879	-0.000922092	0.000165656	0.999622	0.999078	1.00017
vP5ApF	Plcfx9	Bladder cancer	NAV3_ENSG00000067798	Wald ratio	1	0.000168406	0.000358765	0.638779	-0.000534773	0.000871585	1.00017	0.999465	1.00087
vSgygK	Plcfx9	Bladder cancer	TRPM3_ENSG00000083067	Inverse variance weighted	2	0.000276813	0.000242755	0.254162	-0.000198986	0.000752612	1.00028	0.999801	1.00075
vsYk0W	Plcfx9	Bladder cancer	LINC02652_ENSG00000237128	Inverse variance weighted	2	0.000378828	0.000227549	0.0959483	-6.71675e-05	0.000824825	1.00038	0.999933	1.00083
vw2tWr	Plcfx9	Bladder cancer	AC107871.2_ENSG00000260657	Wald ratio	1	0.000220153	0.000225119	0.328103	-0.000221079	0.000661385	1.00022	0.999779	1.00066
vyBCKE	Plcfx9	Bladder cancer	TRPV3_ENSG00000167723	Wald ratio	1	0.00033843	0.000297299	0.254975	-0.000244276	0.000921136	1.00034	0.999756	1.00092
W1kSHt	Plcfx9	Bladder cancer	SETD4_ENSG00000185917	Wald ratio	1	-4.52074e-05	0.000298817	0.879749	-0.000630889	0.000540475	0.999955	0.999369	1.00054
W1uL4n	Plcfx9	Bladder cancer	AL031056.1_ENSG00000228408	Wald ratio	1	0.00041343	0.00027256	0.129307	-0.000120788	0.000947648	1.00041	0.999879	1.00095
W2l2ka	Plcfx9	Bladder cancer	XRRA1_ENSG00000166435	Wald ratio	1	0.000129671	0.000161608	0.422333	-0.000187081	0.000446423	1.00013	0.999813	1.00045
W2rx1A	Plcfx9	Bladder cancer	CAB39L_ENSG00000102547	Wald ratio	1	0.000336139	0.000360875	0.351619	-0.000371177	0.00104345	1.00034	0.999629	1.00104
w8vsrI	Plcfx9	Bladder cancer	TXNL4B_ENSG00000140830	Wald ratio	1	7.87302e-05	0.000290066	0.786067	-0.0004898	0.00064726	1.00008	0.99951	1.00065
w95KKC	Plcfx9	Bladder cancer	ZP3_ENSG00000188372	Wald ratio	1	-0.000408867	0.000299938	0.172828	-0.000996744	0.000179011	0.999591	0.999004	1.00018
WMF8q8	Plcfx9	Bladder cancer	ECHDC3_ENSG00000134463	Wald ratio	1	-0.000352529	0.000274372	0.198842	-0.000890299	0.00018524	0.999648	0.99911	1.00019
WNNPZg	Plcfx9	Bladder cancer	KCNMA1_ENSG00000156113	Wald ratio	1	-0.000105272	0.000421014	0.802554	-0.00093046	0.000719916	0.999895	0.99907	1.00072
Wo0ZiQ	Plcfx9	Bladder cancer	MAPK12_ENSG00000188130	Wald ratio	1	4.14166e-05	0.000388202	0.915036	-0.000719458	0.000802292	1.00004	0.999281	1.0008
WsF1P0	Plcfx9	Bladder cancer	CENPP_ENSG00000188312	MR Egger	4	-0.00190069	0.00384064	0.669701	-0.00942834	0.00562696	0.998101	0.990616	1.00564
WsF1P0	Plcfx9	Bladder cancer	CENPP_ENSG00000188312	Weighted median	4	-7.73631e-05	0.000126773	0.541697	-0.000325838	0.000171112	0.999923	0.999674	1.00017
WsF1P0	Plcfx9	Bladder cancer	CENPP_ENSG00000188312	Inverse variance weighted	4	-4.50454e-05	0.000113141	0.69053	-0.000266801	0.000176711	0.999955	0.999733	1.00018
WsF1P0	Plcfx9	Bladder cancer	CENPP_ENSG00000188312	Simple mode	4	-8.03458e-05	0.000167347	0.66398	-0.000408347	0.000247655	0.99992	0.999592	1.00025
WsF1P0	Plcfx9	Bladder cancer	CENPP_ENSG00000188312	Weighted mode	4	-8.03458e-05	0.00016863	0.666298	-0.000410861	0.00025017	0.99992	0.999589	1.00025
wtgRNT	Plcfx9	Bladder cancer	SLC35G2_ENSG00000168917	Wald ratio	1	-0.000206365	0.000366979	0.573888	-0.000925643	0.000512913	0.999794	0.999075	1.00051
WtoC2O	Plcfx9	Bladder cancer	DNAH7_ENSG00000118997	Inverse variance weighted	2	-0.000454843	0.000237863	0.0558501	-0.000921055	1.13691e-05	0.999545	0.999079	1.00001
Wu2NiO	Plcfx9	Bladder cancer	SFTPD_ENSG00000133661	Wald ratio	1	0.000200334	0.000272157	0.461671	-0.000333093	0.000733762	1.0002	0.999667	1.00073
x7RgCr	Plcfx9	Bladder cancer	RPN1_ENSG00000163902	Wald ratio	1	0.00046276	0.000269127	0.0855262	-6.47292e-05	0.000990248	1.00046	0.999935	1.00099
XBggdr	Plcfx9	Bladder cancer	MPP7_ENSG00000150054	Wald ratio	1	-0.000488648	0.000279847	0.0807886	-0.00103715	5.98511e-05	0.999511	0.998963	1.00006
XiKflf	Plcfx9	Bladder cancer	PPIE_ENSG00000084072	Wald ratio	1	6.47475e-08	0.000395091	0.999869	-0.000774314	0.000774444	1	0.999226	1.00077
xkNht4	Plcfx9	Bladder cancer	ZNF880_ENSG00000221923	Wald ratio	1	-0.000243122	0.000222209	0.273905	-0.000678652	0.000192408	0.999757	0.999322	1.00019
xN5Zhl	Plcfx9	Bladder cancer	ZNF257_ENSG00000197134	MR Egger	3	0.000178647	0.00221982	0.948876	-0.00417219	0.00452948	1.00018	0.995837	1.00454
xN5Zhl	Plcfx9	Bladder cancer	ZNF257_ENSG00000197134	Weighted median	3	3.51463e-05	0.000168929	0.835187	-0.000295954	0.000366247	1.00004	0.999704	1.00037
xN5Zhl	Plcfx9	Bladder cancer	ZNF257_ENSG00000197134	Inverse variance weighted	3	1.77177e-05	0.000146012	0.903418	-0.000268465	0.0003039	1.00002	0.999732	1.0003
xN5Zhl	Plcfx9	Bladder cancer	ZNF257_ENSG00000197134	Simple mode	3	4.19935e-05	0.000200234	0.853308	-0.000350464	0.000434451	1.00004	0.99965	1.00043
xN5Zhl	Plcfx9	Bladder cancer	ZNF257_ENSG00000197134	Weighted mode	3	4.12537e-05	0.000212813	0.864198	-0.00037586	0.000458367	1.00004	0.999624	1.00046
XPJrmk	Plcfx9	Bladder cancer	SDK1_ENSG00000146555	MR Egger	3	-7.22365e-05	0.00182645	0.974835	-0.00365208	0.00350761	0.999928	0.996355	1.00351
XPJrmk	Plcfx9	Bladder cancer	SDK1_ENSG00000146555	Weighted median	3	-0.000400102	0.000215408	0.0632516	-0.000822302	2.20969e-05	0.9996	0.999178	1.00002
XPJrmk	Plcfx9	Bladder cancer	SDK1_ENSG00000146555	Inverse variance weighted	3	-0.000336145	0.000170383	0.0485094	-0.000670096	-2.19429e-06	0.999664	0.99933	0.999998
XPJrmk	Plcfx9	Bladder cancer	SDK1_ENSG00000146555	Simple mode	3	-0.000496363	0.000273231	0.210915	-0.00103189	3.9169e-05	0.999504	0.998969	1.00004
XPJrmk	Plcfx9	Bladder cancer	SDK1_ENSG00000146555	Weighted mode	3	-0.000494106	0.00026867	0.207279	-0.0010207	3.24866e-05	0.999506	0.99898	1.00003
xV6XaB	Plcfx9	Bladder cancer	RNASEH2B_ENSG00000136104	Wald ratio	1	6.5746e-06	0.000216158	0.975735	-0.000417095	0.000430244	1.00001	0.999583	1.00043
XYlbFL	Plcfx9	Bladder cancer	COLGALT2_ENSG00000198756	Wald ratio	1	-1.7066e-05	0.000200712	0.93224	-0.000410462	0.00037633	0.999983	0.99959	1.00038
Xzm2Xg	Plcfx9	Bladder cancer	FGL1_ENSG00000104760	Inverse variance weighted	2	0.000256188	0.000213171	0.229444	-0.000161628	0.000674004	1.00026	0.999838	1.00067
Y6ud2b	Plcfx9	Bladder cancer	ARL17B_ENSG00000228696	MR Egger	8	-0.000148012	0.000275068	0.609877	-0.000687147	0.000391122	0.999852	0.999313	1.00039
Y6ud2b	Plcfx9	Bladder cancer	ARL17B_ENSG00000228696	Weighted median	8	6.72076e-05	6.20791e-05	0.27898	-5.44674e-05	0.000188883	1.00007	0.999946	1.00019
Y6ud2b	Plcfx9	Bladder cancer	ARL17B_ENSG00000228696	Inverse variance weighted	8	8.91777e-05	4.99546e-05	0.0742325	-8.73318e-06	0.000187089	1.00009	0.999991	1.00019
Y6ud2b	Plcfx9	Bladder cancer	ARL17B_ENSG00000228696	Simple mode	8	6.74019e-05	8.55313e-05	0.456526	-0.000100239	0.000235043	1.00007	0.9999	1.00024
Y6ud2b	Plcfx9	Bladder cancer	ARL17B_ENSG00000228696	Weighted mode	8	6.74019e-05	7.56216e-05	0.402362	-8.08165e-05	0.00021562	1.00007	0.999919	1.00022
yAbwUA	Plcfx9	Bladder cancer	ARFIP1_ENSG00000164144	Inverse variance weighted	2	-0.000182525	0.000228201	0.423801	-0.000629799	0.000264749	0.999817	0.99937	1.00026
yed9UJ	Plcfx9	Bladder cancer	FAM89A_ENSG00000182118	Wald ratio	1	-0.000144885	0.00026235	0.58077	-0.000659091	0.00036932	0.999855	0.999341	1.00037
yfdPaO	Plcfx9	Bladder cancer	NALCN_ENSG00000102452	Wald ratio	1	-3.02805e-06	0.000436718	0.994468	-0.000858995	0.000852939	0.999997	0.999141	1.00085
YI5C31	Plcfx9	Bladder cancer	TRIM5_ENSG00000132256	Wald ratio	1	-5.279e-05	0.000262605	0.840679	-0.000567496	0.000461916	0.999947	0.999433	1.00046
yIVQCU	Plcfx9	Bladder cancer	AC005697.1_ENSG00000266202	Wald ratio	1	0.000154555	0.000212138	0.466271	-0.000261235	0.000570346	1.00015	0.999739	1.00057
yjCvaQ	Plcfx9	Bladder cancer	MTMR3_ENSG00000100330	MR Egger	5	-0.000150292	0.00304301	0.963713	-0.0061146	0.00581401	0.99985	0.993904	1.00583
yjCvaQ	Plcfx9	Bladder cancer	MTMR3_ENSG00000100330	Weighted median	5	-9.71406e-05	0.000214224	0.650222	-0.00051702	0.000322738	0.999903	0.999483	1.00032
yjCvaQ	Plcfx9	Bladder cancer	MTMR3_ENSG00000100330	Inverse variance weighted	5	-8.20157e-05	0.000187373	0.661593	-0.000449266	0.000285235	0.999918	0.999551	1.00029
yjCvaQ	Plcfx9	Bladder cancer	MTMR3_ENSG00000100330	Simple mode	5	-0.000119862	0.000274671	0.685078	-0.000658217	0.000418493	0.99988	0.999342	1.00042
yjCvaQ	Plcfx9	Bladder cancer	MTMR3_ENSG00000100330	Weighted mode	5	-0.000119862	0.000303087	0.712679	-0.000713912	0.000474188	0.99988	0.999286	1.00047
yJOEbc	Plcfx9	Bladder cancer	FRA10AC1_ENSG00000148690	Inverse variance weighted	2	0.000369296	0.000211146	0.0802894	-4.45497e-05	0.000783141	1.00037	0.999955	1.00078
YTSocn	Plcfx9	Bladder cancer	FREM2_ENSG00000150893	Wald ratio	1	0.000267327	0.000179032	0.135389	-8.35748e-05	0.000618229	1.00027	0.999916	1.00062
YTspW5	Plcfx9	Bladder cancer	AC006504.2_ENSG00000266977	Inverse variance weighted	2	-0.000199872	0.000316795	0.528092	-0.00082079	0.000421045	0.9998	0.99918	1.00042
yUFp7Y	Plcfx9	Bladder cancer	TTC3_ENSG00000182670	Wald ratio	1	0.000175565	0.000314411	0.576576	-0.000440681	0.00079181	1.00018	0.999559	1.00079
ywqtaL	Plcfx9	Bladder cancer	FRG1-DT_ENSG00000245685	Wald ratio	1	-9.81397e-05	0.000319684	0.758851	-0.00072472	0.00052844	0.999902	0.999276	1.00053
yZqJRT	Plcfx9	Bladder cancer	PRPF4_ENSG00000136875	Wald ratio	1	0.000135623	0.000301301	0.65262	-0.000454926	0.000726173	1.00014	0.999545	1.00073
zFlcTI	Plcfx9	Bladder cancer	DSCC1_ENSG00000136982	Wald ratio	1	0.000216092	0.000304074	0.477297	-0.000379892	0.000812076	1.00022	0.99962	1.00081
zhBa0r	Plcfx9	Bladder cancer	GATD3A_ENSG00000160221	Wald ratio	1	0.000104446	0.000194066	0.590438	-0.000275922	0.000484815	1.0001	0.999724	1.00048
zIJknu	Plcfx9	Bladder cancer	LINC01354_ENSG00000231768	Wald ratio	1	-6.90164e-06	0.000355673	0.984518	-0.000704021	0.000690218	0.999993	0.999296	1.00069
Zk3d5C	Plcfx9	Bladder cancer	HACD2_ENSG00000206527	Wald ratio	1	0.000651602	0.000334527	0.0514352	-4.071e-06	0.00130727	1.00065	0.999996	1.00131
zkaf8E	Plcfx9	Bladder cancer	PDHX_ENSG00000110435	Wald ratio	1	-2.6928e-05	0.000379404	0.943418	-0.000770559	0.000716703	0.999973	0.99923	1.00072
zKD8mm	Plcfx9	Bladder cancer	SERPIND1_ENSG00000099937	Wald ratio	1	0.000191951	0.00046325	0.678612	-0.000716019	0.00109992	1.00019	0.999284	1.0011
zMwvI4	Plcfx9	Bladder cancer	HLA-A_ENSG00000206503	Wald ratio	1	-0.000195404	0.000385393	0.612138	-0.000950775	0.000559967	0.999805	0.99905	1.00056
zozhfG	Plcfx9	Bladder cancer	MAP2K5_ENSG00000137764	Wald ratio	1	3.7001e-05	0.00039831	0.925987	-0.000743686	0.000817688	1.00004	0.999257	1.00082
ZqwqPG	Plcfx9	Bladder cancer	ASPN_ENSG00000106819	Wald ratio	1	0.000124186	0.000374657	0.740292	-0.000610141	0.000858513	1.00012	0.99939	1.00086
ZU4MoO	Plcfx9	Bladder cancer	ATG10_ENSG00000152348	Inverse variance weighted	2	7.00985e-05	0.000211496	0.740311	-0.000344433	0.00048463	1.00007	0.999656	1.00048
zuoxGB	Plcfx9	Bladder cancer	POU2F3_ENSG00000137709	Wald ratio	1	0.000110069	0.000269939	0.683455	-0.000419013	0.00063915	1.00011	0.999581	1.00064
zV5LOR	Plcfx9	Bladder cancer	LTF_ENSG00000012223	Wald ratio	1	0.000227538	0.000271168	0.401411	-0.000303951	0.000759028	1.00023	0.999696	1.00076
zvkSNH	Plcfx9	Bladder cancer	WDR60_ENSG00000126870	Wald ratio	1	-0.000265463	0.000287647	0.35607	-0.000829251	0.000298325	0.999735	0.999171	1.0003
ZYWxMC	Plcfx9	Bladder cancer	TMEM50B_ENSG00000142188	Wald ratio	1	-0.000234477	0.000361617	0.516718	-0.000943248	0.000474293	0.999766	0.999057	1.00047

## Sheet: Supplementary table 14
id.exposure	id.outcome	outcome	exposure	method	nsnp	b	se	pval	lo_ci	up_ci	or	or_lci95	or_uci95
0apmVu	zYgDwo	Bladder cancer	ERAP2_ENSG00000164308	Wald ratio	1	-0.000115473	0.000190747	0.544929	-0.000489337	0.00025839	0.999885	0.999511	1.00026
0HA89a	zYgDwo	Bladder cancer	PWP2_ENSG00000241945	Wald ratio	1	-2.08142e-05	0.0002117	0.921679	-0.000435746	0.000394117	0.999979	0.999564	1.00039
2Qt3Q7	zYgDwo	Bladder cancer	KANSL1_ENSG00000120071	MR Egger	9	-0.000198357	0.000752433	0.799664	-0.00167313	0.00127641	0.999802	0.998328	1.00128
2Qt3Q7	zYgDwo	Bladder cancer	KANSL1_ENSG00000120071	Weighted median	9	8.34539e-05	7.1029e-05	0.240024	-5.57629e-05	0.000222671	1.00008	0.999944	1.00022
2Qt3Q7	zYgDwo	Bladder cancer	KANSL1_ENSG00000120071	Inverse variance weighted	9	9.49883e-05	5.95663e-05	0.110787	-2.17615e-05	0.000211738	1.00009	0.999978	1.00021
2Qt3Q7	zYgDwo	Bladder cancer	KANSL1_ENSG00000120071	Simple mode	9	7.29567e-05	0.000106778	0.513743	-0.000136328	0.000282242	1.00007	0.999864	1.00028
2Qt3Q7	zYgDwo	Bladder cancer	KANSL1_ENSG00000120071	Weighted mode	9	7.29567e-05	0.000102127	0.495308	-0.000127211	0.000273125	1.00007	0.999873	1.00027
33Dvbu	zYgDwo	Bladder cancer	PDSS1_ENSG00000148459	Wald ratio	1	-1.1483e-05	0.00023357	0.960789	-0.000469279	0.000446313	0.999989	0.999531	1.00045
3Krfo6	zYgDwo	Bladder cancer	SLC1A7_ENSG00000162383	Wald ratio	1	0.000229761	0.000163578	0.160141	-9.08517e-05	0.000550373	1.00023	0.999909	1.00055
56Wi2Q	zYgDwo	Bladder cancer	SULT1C2_ENSG00000198203	Wald ratio	1	-4.37955e-05	0.000174623	0.801968	-0.000386056	0.000298465	0.999956	0.999614	1.0003
5hBCxP	zYgDwo	Bladder cancer	TMEM132C_ENSG00000181234	Wald ratio	1	-0.000145384	0.00024347	0.550417	-0.000622585	0.000331816	0.999855	0.999378	1.00033
5V3Cni	zYgDwo	Bladder cancer	APIP_ENSG00000149089	Wald ratio	1	-0.00033176	0.000209315	0.112971	-0.000742018	7.84977e-05	0.999668	0.999258	1.00008
5Xnooo	zYgDwo	Bladder cancer	AC093151.3_ENSG00000235358	MR Egger	3	0.00154328	0.0129992	0.924772	-0.0239352	0.0270218	1.00154	0.976349	1.02739
5Xnooo	zYgDwo	Bladder cancer	AC093151.3_ENSG00000235358	Weighted median	3	-1.81481e-05	0.000141234	0.897756	-0.000294966	0.00025867	0.999982	0.999705	1.00026
5Xnooo	zYgDwo	Bladder cancer	AC093151.3_ENSG00000235358	Inverse variance weighted	3	-1.49168e-06	0.000119968	0.990079	-0.000236629	0.000233645	0.999999	0.999763	1.00023
5Xnooo	zYgDwo	Bladder cancer	AC093151.3_ENSG00000235358	Simple mode	3	-2.45442e-05	0.000169758	0.898294	-0.000357269	0.000308181	0.999975	0.999643	1.00031
5Xnooo	zYgDwo	Bladder cancer	AC093151.3_ENSG00000235358	Weighted mode	3	-2.45442e-05	0.000156539	0.889806	-0.00033136	0.000282272	0.999975	0.999669	1.00028
67yVOj	zYgDwo	Bladder cancer	PM20D1_ENSG00000162877	Wald ratio	1	8.97236e-05	0.00026655	0.73641	-0.000432714	0.000612161	1.00009	0.999567	1.00061
6Bq7mQ	zYgDwo	Bladder cancer	ARL17B_ENSG00000228696	MR Egger	10	-0.000340711	0.000442768	0.463708	-0.00120854	0.000527115	0.999659	0.998792	1.00053
6Bq7mQ	zYgDwo	Bladder cancer	ARL17B_ENSG00000228696	Weighted median	10	6.79676e-05	5.49201e-05	0.215875	-3.96757e-05	0.000175611	1.00007	0.99996	1.00018
6Bq7mQ	zYgDwo	Bladder cancer	ARL17B_ENSG00000228696	Inverse variance weighted	10	8.81472e-05	4.42941e-05	0.0465861	1.33075e-06	0.000174964	1.00009	1	1.00017
6Bq7mQ	zYgDwo	Bladder cancer	ARL17B_ENSG00000228696	Simple mode	10	6.7624e-05	8.09818e-05	0.4253	-9.11004e-05	0.000226348	1.00007	0.999909	1.00023
6Bq7mQ	zYgDwo	Bladder cancer	ARL17B_ENSG00000228696	Weighted mode	10	6.7624e-05	7.8885e-05	0.413552	-8.69906e-05	0.000222239	1.00007	0.999913	1.00022
6dcDal	zYgDwo	Bladder cancer	SLFN5_ENSG00000166750	Wald ratio	1	6.13221e-05	0.000196388	0.754851	-0.000323599	0.000446243	1.00006	0.999676	1.00045
6SzK5e	zYgDwo	Bladder cancer	ZSCAN23_ENSG00000187987	Wald ratio	1	-0.000162012	0.00023485	0.490287	-0.000622317	0.000298294	0.999838	0.999378	1.0003
7seTIz	zYgDwo	Bladder cancer	BACE2_ENSG00000182240	Wald ratio	1	-0.000329124	0.000357778	0.357619	-0.00103037	0.00037212	0.999671	0.99897	1.00037
7XrtGz	zYgDwo	Bladder cancer	IGHMBP2_ENSG00000132740	Inverse variance weighted	2	-0.000180069	0.000199143	0.36588	-0.000570389	0.000210252	0.99982	0.99943	1.00021
84f4Vj	zYgDwo	Bladder cancer	SNX19_ENSG00000120451	Wald ratio	1	-3.5545e-05	0.000165167	0.829606	-0.000359273	0.000288183	0.999964	0.999641	1.00029
9Upo3n	zYgDwo	Bladder cancer	IFITM2_ENSG00000185201	Wald ratio	1	0.00018977	0.000473142	0.688358	-0.000737589	0.00111713	1.00019	0.999263	1.00112
Aa3OyO	zYgDwo	Bladder cancer	SPARC_ENSG00000113140	Wald ratio	1	3.28629e-05	0.000258665	0.898902	-0.00047412	0.000539846	1.00003	0.999526	1.00054
AVN6GS	zYgDwo	Bladder cancer	IL18R1_ENSG00000115604	Inverse variance weighted	2	9.19215e-05	0.000111104	0.408039	-0.000125841	0.000309684	1.00009	0.999874	1.00031
avtnvO	zYgDwo	Bladder cancer	SGCA_ENSG00000108823	Wald ratio	1	8.44137e-05	0.000163651	0.605983	-0.000236342	0.000405169	1.00008	0.999764	1.00041
BezSxg	zYgDwo	Bladder cancer	TRGC2_ENSG00000227191	Wald ratio	1	-7.45146e-06	0.000166541	0.964313	-0.000333872	0.000318969	0.999993	0.999666	1.00032
BFy1rh	zYgDwo	Bladder cancer	CNOT8_ENSG00000155508	Inverse variance weighted	2	-5.34686e-05	0.000193704	0.782523	-0.000433129	0.000326191	0.999947	0.999567	1.00033
BieBjY	zYgDwo	Bladder cancer	COL24A1_ENSG00000171502	Wald ratio	1	0.000313841	0.000172756	0.0692676	-2.47611e-05	0.000652443	1.00031	0.999975	1.00065
boBp1e	zYgDwo	Bladder cancer	HLA-DQB1_ENSG00000179344	Wald ratio	1	-6.03633e-05	0.000196721	0.75896	-0.000445937	0.00032521	0.99994	0.999554	1.00033
clzpgB	zYgDwo	Bladder cancer	TAF1C_ENSG00000103168	Wald ratio	1	9.36422e-05	0.000276438	0.734801	-0.000448176	0.00063546	1.00009	0.999552	1.00064
dLBdyb	zYgDwo	Bladder cancer	DNAH11_ENSG00000105877	Wald ratio	1	-4.58609e-05	0.000313568	0.88372	-0.000660453	0.000568732	0.999954	0.99934	1.00057
epQLL0	zYgDwo	Bladder cancer	YEATS4_ENSG00000127337	Wald ratio	1	0.000150185	0.000278028	0.589074	-0.00039475	0.00069512	1.00015	0.999605	1.0007
er7fR9	zYgDwo	Bladder cancer	FAM118A_ENSG00000100376	Wald ratio	1	0.000109373	0.000199209	0.58298	-0.000281076	0.000499822	1.00011	0.999719	1.0005
fE78RC	zYgDwo	Bladder cancer	MAP2K5_ENSG00000137764	Inverse variance weighted	2	0.000101508	0.000294053	0.729942	-0.000474836	0.000677852	1.0001	0.999525	1.00068
ffUZmH	zYgDwo	Bladder cancer	MXRA7_ENSG00000182534	Wald ratio	1	-0.000266906	0.000242806	0.271658	-0.000742806	0.000208995	0.999733	0.999257	1.00021
g1JwbL	zYgDwo	Bladder cancer	HLA-C_ENSG00000204525	Wald ratio	1	-0.000586132	0.000599816	0.328476	-0.00176177	0.000589506	0.999414	0.99824	1.00059
gAML11	zYgDwo	Bladder cancer	ZNF100_ENSG00000197020	Wald ratio	1	0.000193536	0.000148141	0.191406	-9.682e-05	0.000483892	1.00019	0.999903	1.00048
gJKsWg	zYgDwo	Bladder cancer	CCDC32_ENSG00000128891	Wald ratio	1	-0.000172587	0.000252232	0.493825	-0.000666962	0.000321788	0.999827	0.999333	1.00032
GU6okl	zYgDwo	Bladder cancer	TMEM215_ENSG00000188133	Wald ratio	1	0.000108014	0.000197838	0.585083	-0.000279748	0.000495776	1.00011	0.99972	1.0005
HGVCLv	zYgDwo	Bladder cancer	ZSCAN31_ENSG00000235109	Wald ratio	1	7.34018e-05	0.000234439	0.754208	-0.000386099	0.000532902	1.00007	0.999614	1.00053
HUK5k1	zYgDwo	Bladder cancer	LRRC37A2_ENSG00000238083	MR Egger	6	-0.000471311	0.00182003	0.808448	-0.00403857	0.00309595	0.999529	0.99597	1.0031
HUK5k1	zYgDwo	Bladder cancer	LRRC37A2_ENSG00000238083	Weighted median	6	9.74013e-05	9.05924e-05	0.282303	-8.01599e-05	0.000274962	1.0001	0.99992	1.00028
HUK5k1	zYgDwo	Bladder cancer	LRRC37A2_ENSG00000238083	Inverse variance weighted	6	0.000109024	7.77297e-05	0.160736	-4.33266e-05	0.000261374	1.00011	0.999957	1.00026
HUK5k1	zYgDwo	Bladder cancer	LRRC37A2_ENSG00000238083	Simple mode	6	9.70695e-05	0.000121172	0.459439	-0.000140428	0.000334567	1.0001	0.99986	1.00033
HUK5k1	zYgDwo	Bladder cancer	LRRC37A2_ENSG00000238083	Weighted mode	6	9.70695e-05	0.000121501	0.460585	-0.000141072	0.000335211	1.0001	0.999859	1.00034
HvPT5U	zYgDwo	Bladder cancer	NKTR_ENSG00000114857	Inverse variance weighted	2	6.91452e-05	0.000202703	0.733017	-0.000328154	0.000466444	1.00007	0.999672	1.00047
hyZPEv	zYgDwo	Bladder cancer	AKR1C1_ENSG00000187134	Wald ratio	1	-5.34292e-05	0.000222412	0.810154	-0.000489356	0.000382497	0.999947	0.999511	1.00038
iP9bdl	zYgDwo	Bladder cancer	MRPL19_ENSG00000115364	Wald ratio	1	0.000213409	0.000358082	0.55119	-0.000488431	0.000915249	1.00021	0.999512	1.00092
J7XCs5	zYgDwo	Bladder cancer	SCUBE1_ENSG00000159307	Wald ratio	1	-1.69305e-05	0.000152401	0.911543	-0.000315636	0.000281775	0.999983	0.999684	1.00028
JFBRMf	zYgDwo	Bladder cancer	HLA-DRB5_ENSG00000198502	MR Egger	5	-0.00257228	0.00178281	0.244767	-0.00606659	0.00092204	0.997431	0.993952	1.00092
JFBRMf	zYgDwo	Bladder cancer	HLA-DRB5_ENSG00000198502	Weighted median	5	3.43323e-05	0.000106963	0.748231	-0.000175315	0.00024398	1.00003	0.999825	1.00024
JFBRMf	zYgDwo	Bladder cancer	HLA-DRB5_ENSG00000198502	Inverse variance weighted	5	8.74581e-05	8.86854e-05	0.324054	-8.63652e-05	0.000261281	1.00009	0.999914	1.00026
JFBRMf	zYgDwo	Bladder cancer	HLA-DRB5_ENSG00000198502	Simple mode	5	2.61998e-05	0.000137358	0.858018	-0.000243023	0.000295422	1.00003	0.999757	1.0003
JFBRMf	zYgDwo	Bladder cancer	HLA-DRB5_ENSG00000198502	Weighted mode	5	2.61998e-05	0.000140061	0.860718	-0.000248319	0.000300719	1.00003	0.999752	1.0003
kUYNkL	zYgDwo	Bladder cancer	CTSH_ENSG00000103811	Wald ratio	1	0.000194103	0.000271672	0.474933	-0.000338374	0.00072658	1.00019	0.999662	1.00073
M3yr0j	zYgDwo	Bladder cancer	CCN3_ENSG00000136999	Wald ratio	1	0.000331387	0.000224495	0.139904	-0.000108622	0.000771397	1.00033	0.999891	1.00077
m5qGVl	zYgDwo	Bladder cancer	FMO4_ENSG00000076258	Wald ratio	1	0.000198606	0.000257695	0.440884	-0.000306477	0.000703689	1.0002	0.999694	1.0007
MKIuA8	zYgDwo	Bladder cancer	ARFGAP3_ENSG00000242247	MR Egger	3	0.000119722	0.00197101	0.961378	-0.00374346	0.00398291	1.00012	0.996264	1.00399
MKIuA8	zYgDwo	Bladder cancer	ARFGAP3_ENSG00000242247	Weighted median	3	6.14896e-05	0.000152924	0.687615	-0.000238241	0.00036122	1.00006	0.999762	1.00036
MKIuA8	zYgDwo	Bladder cancer	ARFGAP3_ENSG00000242247	Inverse variance weighted	3	6.21215e-05	0.000130951	0.635223	-0.000194542	0.000318785	1.00006	0.999805	1.00032
MKIuA8	zYgDwo	Bladder cancer	ARFGAP3_ENSG00000242247	Simple mode	3	5.91615e-05	0.000165128	0.754419	-0.00026449	0.000382813	1.00006	0.999736	1.00038
MKIuA8	zYgDwo	Bladder cancer	ARFGAP3_ENSG00000242247	Weighted mode	3	6.00238e-05	0.000173316	0.76214	-0.000279676	0.000399723	1.00006	0.99972	1.0004
nRfsQq	zYgDwo	Bladder cancer	LINC01340_ENSG00000250331	Wald ratio	1	0.000108773	0.000231873	0.638993	-0.000345697	0.000563244	1.00011	0.999654	1.00056
oxCUWN	zYgDwo	Bladder cancer	IGF1R_ENSG00000140443	Wald ratio	1	-0.000137811	0.000272206	0.612663	-0.000671334	0.000395712	0.999862	0.999329	1.0004
OyGmZT	zYgDwo	Bladder cancer	GATD3A_ENSG00000160221	Wald ratio	1	0.000115771	0.000173294	0.504093	-0.000223885	0.000455428	1.00012	0.999776	1.00046
P3VrbR	zYgDwo	Bladder cancer	PLSCR4_ENSG00000114698	Wald ratio	1	-0.000674674	0.000356572	0.058476	-0.00137355	2.42067e-05	0.999326	0.998627	1.00002
q0wdyi	zYgDwo	Bladder cancer	AC090630.1_ENSG00000257239	Wald ratio	1	-0.000178691	0.00020847	0.391359	-0.000587293	0.00022991	0.999821	0.999413	1.00023
qnqavW	zYgDwo	Bladder cancer	C22orf34_ENSG00000188511	Wald ratio	1	-5.01418e-05	0.000143435	0.726655	-0.000331274	0.00023099	0.99995	0.999669	1.00023
QzfDvF	zYgDwo	Bladder cancer	CLHC1_ENSG00000162994	Wald ratio	1	-7.73802e-05	0.000192119	0.687115	-0.000453933	0.000299172	0.999923	0.999546	1.0003
SDB0M1	zYgDwo	Bladder cancer	HLA-DRB1_ENSG00000196126	MR Egger	3	-0.000982935	0.00100507	0.507089	-0.00295288	0.000987009	0.999018	0.997051	1.00099
SDB0M1	zYgDwo	Bladder cancer	HLA-DRB1_ENSG00000196126	Weighted median	3	-4.5169e-05	0.000138917	0.745067	-0.000317446	0.000227108	0.999955	0.999683	1.00023
SDB0M1	zYgDwo	Bladder cancer	HLA-DRB1_ENSG00000196126	Inverse variance weighted	3	-2.53024e-05	0.000115412	0.826467	-0.00025151	0.000200906	0.999975	0.999749	1.0002
SDB0M1	zYgDwo	Bladder cancer	HLA-DRB1_ENSG00000196126	Simple mode	3	-3.91101e-05	0.000163912	0.833632	-0.000360377	0.000282157	0.999961	0.99964	1.00028
SDB0M1	zYgDwo	Bladder cancer	HLA-DRB1_ENSG00000196126	Weighted mode	3	-7.31826e-05	0.000162833	0.697129	-0.000392335	0.00024597	0.999927	0.999608	1.00025
T3la0e	zYgDwo	Bladder cancer	ZIC1_ENSG00000152977	Wald ratio	1	5.87361e-05	0.000231032	0.799315	-0.000394087	0.000511559	1.00006	0.999606	1.00051
T8KJUh	zYgDwo	Bladder cancer	RDH13_ENSG00000160439	Wald ratio	1	-6.00139e-05	0.000269935	0.824059	-0.000589087	0.00046906	0.99994	0.999411	1.00047
tlV5nA	zYgDwo	Bladder cancer	ARL17A_ENSG00000185829	Inverse variance weighted	2	4.1376e-05	0.000133126	0.755951	-0.000219552	0.000302304	1.00004	0.99978	1.0003
uECinP	zYgDwo	Bladder cancer	AC244131.2_ENSG00000275119	Inverse variance weighted	2	0.000334402	0.000170507	0.0498526	2.09195e-07	0.000668595	1.00033	1	1.00067
UUZERx	zYgDwo	Bladder cancer	GEN1_ENSG00000178295	Wald ratio	1	9.22203e-05	0.000207707	0.657048	-0.000314885	0.000499326	1.00009	0.999685	1.0005
VI0PJs	zYgDwo	Bladder cancer	CAT_ENSG00000121691	Wald ratio	1	0.000197615	0.000284153	0.486772	-0.000359325	0.000754555	1.0002	0.999641	1.00075
W59bCe	zYgDwo	Bladder cancer	RPS26_ENSG00000197728	Wald ratio	1	-4.12326e-05	0.000290176	0.887005	-0.000609977	0.000527512	0.999959	0.99939	1.00053
WdCnRM	zYgDwo	Bladder cancer	PILRB_ENSG00000121716	Inverse variance weighted	2	-0.000361695	0.000183444	0.0486448	-0.000721245	-2.14475e-06	0.999638	0.999279	0.999998
wZrnnS	zYgDwo	Bladder cancer	MYO1H_ENSG00000174527	Inverse variance weighted	2	-0.000194906	0.000153938	0.205465	-0.000496625	0.000106812	0.999805	0.999503	1.00011
XdHT7i	zYgDwo	Bladder cancer	LINC01693_ENSG00000227764	Wald ratio	1	-0.00015759	0.000245507	0.520942	-0.000638784	0.000323605	0.999842	0.999361	1.00032
xkSSbQ	zYgDwo	Bladder cancer	KLHDC4_ENSG00000104731	Wald ratio	1	-0.000112863	0.000202887	0.578016	-0.000510521	0.000284795	0.999887	0.99949	1.00028
xmA4M3	zYgDwo	Bladder cancer	U2AF1_ENSG00000160201	Wald ratio	1	5.70811e-05	0.000188337	0.76183	-0.00031206	0.000426222	1.00006	0.999688	1.00043

## Sheet: Supplementary table 15
id.exposure	id.outcome	outcome	exposure	method	nsnp	b	se	pval	lo_ci	up_ci	or	or_lci95	or_uci95
01X7Dj	NVUC7S	Bladder cancer	AC004540.1_ENSG00000214870	Wald ratio	1	-0.00010869	0.00017214	0.527775	-0.000446084	0.000228704	0.999891	0.999554	1.00023
0ahuUA	NVUC7S	Bladder cancer	PNPLA7_ENSG00000130653	Wald ratio	1	0.000480605	0.00029306	0.101014	-9.37924e-05	0.001055	1.00048	0.999906	1.00106
0eAXdm	NVUC7S	Bladder cancer	MAEL_ENSG00000143194	Wald ratio	1	-0.000353166	0.000283455	0.21279	-0.000908738	0.000202407	0.999647	0.999092	1.0002
0forHX	NVUC7S	Bladder cancer	EXOSC6_ENSG00000223496	Inverse variance weighted	2	-0.000657081	0.000411542	0.110348	-0.0014637	0.000149541	0.999343	0.998537	1.00015
0wEvdf	NVUC7S	Bladder cancer	LCA5L_ENSG00000157578	Wald ratio	1	-0.000191464	0.000378579	0.613036	-0.000933478	0.00055055	0.999809	0.999067	1.00055
1irZPl	NVUC7S	Bladder cancer	CDK10_ENSG00000185324	Inverse variance weighted	2	-4.60652e-05	0.00029234	0.874792	-0.000619051	0.00052692	0.999954	0.999381	1.00053
1ntD9b	NVUC7S	Bladder cancer	LINC00839_ENSG00000185904	MR Egger	7	8.24861e-05	0.000417639	0.85121	-0.000736086	0.000901059	1.00008	0.999264	1.0009
1ntD9b	NVUC7S	Bladder cancer	LINC00839_ENSG00000185904	Weighted median	7	-0.000211963	0.000103538	0.0406379	-0.000414897	-9.02907e-06	0.999788	0.999585	0.999991
1ntD9b	NVUC7S	Bladder cancer	LINC00839_ENSG00000185904	Inverse variance weighted	7	-0.000154791	8.30835e-05	0.0624513	-0.000317635	8.05263e-06	0.999845	0.999682	1.00001
1ntD9b	NVUC7S	Bladder cancer	LINC00839_ENSG00000185904	Simple mode	7	-0.000261199	0.000155857	0.144777	-0.000566679	4.42811e-05	0.999739	0.999433	1.00004
1ntD9b	NVUC7S	Bladder cancer	LINC00839_ENSG00000185904	Weighted mode	7	-0.000254951	0.000158001	0.157741	-0.000564633	5.47318e-05	0.999745	0.999436	1.00005
1Tzc2q	NVUC7S	Bladder cancer	AC127024.2_ENSG00000263603	Wald ratio	1	0.000284567	0.000509672	0.576616	-0.000714389	0.00128352	1.00028	0.999286	1.00128
1w8rq1	NVUC7S	Bladder cancer	NBAS_ENSG00000151779	Wald ratio	1	0.000305577	0.000528907	0.563431	-0.00073108	0.00134223	1.00031	0.999269	1.00134
2cF0HN	NVUC7S	Bladder cancer	NRG4_ENSG00000169752	Wald ratio	1	0.000160706	0.000242838	0.508111	-0.000315256	0.000636667	1.00016	0.999685	1.00064
2GzGeB	NVUC7S	Bladder cancer	FLYWCH1_ENSG00000059122	Wald ratio	1	0.000540766	0.000306682	0.0778531	-6.03302e-05	0.00114186	1.00054	0.99994	1.00114
2J0Ke6	NVUC7S	Bladder cancer	CENPJ_ENSG00000151849	Wald ratio	1	-0.000129917	0.000383999	0.735117	-0.000882554	0.00062272	0.99987	0.999118	1.00062
2LoOEQ	NVUC7S	Bladder cancer	DYNC1I2_ENSG00000077380	Wald ratio	1	0.000585133	0.000455003	0.198444	-0.000306673	0.00147694	1.00059	0.999693	1.00148
2w0890	NVUC7S	Bladder cancer	POLQ_ENSG00000051341	MR Egger	4	0.000393216	0.00776812	0.96423	-0.0148323	0.0156187	1.00039	0.985277	1.01574
2w0890	NVUC7S	Bladder cancer	POLQ_ENSG00000051341	Weighted median	4	-0.00027079	0.000222926	0.224476	-0.000707724	0.000166144	0.999729	0.999293	1.00017
2w0890	NVUC7S	Bladder cancer	POLQ_ENSG00000051341	Inverse variance weighted	4	-0.000264373	0.000197075	0.179765	-0.00065064	0.000121895	0.999736	0.99935	1.00012
2w0890	NVUC7S	Bladder cancer	POLQ_ENSG00000051341	Simple mode	4	-0.00028512	0.000290735	0.399066	-0.000854962	0.000284721	0.999715	0.999145	1.00028
2w0890	NVUC7S	Bladder cancer	POLQ_ENSG00000051341	Weighted mode	4	-0.000285434	0.000297605	0.408261	-0.00086874	0.000297872	0.999715	0.999132	1.0003
2YI9AE	NVUC7S	Bladder cancer	FAM118A_ENSG00000100376	Inverse variance weighted	2	0.000122115	0.000138166	0.376791	-0.000148691	0.000392921	1.00012	0.999851	1.00039
3ao0je	NVUC7S	Bladder cancer	ZNF534_ENSG00000198633	Wald ratio	1	0.00037493	0.000421447	0.373667	-0.000451106	0.00120097	1.00038	0.999549	1.0012
40yMQ1	NVUC7S	Bladder cancer	CKAP2_ENSG00000136108	Inverse variance weighted	2	-4.1879e-05	0.000195541	0.830415	-0.00042514	0.000341382	0.999958	0.999575	1.00034
43aE97	NVUC7S	Bladder cancer	CFAP61_ENSG00000089101	Wald ratio	1	1.7687e-05	0.000287427	0.950933	-0.00054567	0.000581044	1.00002	0.999454	1.00058
46IJhF	NVUC7S	Bladder cancer	RNASEH2B_ENSG00000136104	Wald ratio	1	5.81337e-06	0.00019113	0.975735	-0.000368802	0.000380429	1.00001	0.999631	1.00038
4aIs5u	NVUC7S	Bladder cancer	SCAPER_ENSG00000140386	MR Egger	4	0.000497875	0.0206099	0.982921	-0.0398975	0.0408932	1.0005	0.960888	1.04174
4aIs5u	NVUC7S	Bladder cancer	SCAPER_ENSG00000140386	Weighted median	4	-0.000681656	0.00032675	0.0369631	-0.00132209	-4.12263e-05	0.999319	0.998679	0.999959
4aIs5u	NVUC7S	Bladder cancer	SCAPER_ENSG00000140386	Inverse variance weighted	4	-0.00067695	0.000292092	0.0204717	-0.00124945	-0.000104449	0.999323	0.998751	0.999896
4aIs5u	NVUC7S	Bladder cancer	SCAPER_ENSG00000140386	Simple mode	4	-0.000687402	0.000410789	0.192848	-0.00149255	0.000117745	0.999313	0.998509	1.00012
4aIs5u	NVUC7S	Bladder cancer	SCAPER_ENSG00000140386	Weighted mode	4	-0.000686835	0.000435762	0.213075	-0.00154093	0.000167258	0.999313	0.99846	1.00017
4dtkNh	NVUC7S	Bladder cancer	GTF2H2_ENSG00000145736	Inverse variance weighted	2	0.000205978	0.000205776	0.316835	-0.000197343	0.000609298	1.00021	0.999803	1.00061
4p0sQ8	NVUC7S	Bladder cancer	ACADS_ENSG00000122971	Wald ratio	1	0.000147877	0.000273518	0.58875	-0.000388218	0.000683971	1.00015	0.999612	1.00068
4vVmHe	NVUC7S	Bladder cancer	PM20D1_ENSG00000162877	Inverse variance weighted	2	0.000140192	0.000126689	0.268474	-0.000108118	0.000388501	1.00014	0.999892	1.00039
5O8ms7	NVUC7S	Bladder cancer	NPIPB2_ENSG00000234719	Wald ratio	1	0.00010044	0.000197169	0.610464	-0.000286012	0.000486892	1.0001	0.999714	1.00049
5suQmb	NVUC7S	Bladder cancer	OSGEP_ENSG00000092094	Wald ratio	1	0.000605439	0.000469222	0.196945	-0.000314236	0.00152511	1.00061	0.999686	1.00153
5xSqQS	NVUC7S	Bladder cancer	NBPF26_ENSG00000273136	Wald ratio	1	-0.00018267	0.0003386	0.589551	-0.000846326	0.000480986	0.999817	0.999154	1.00048
61wMbE	NVUC7S	Bladder cancer	PSMD13_ENSG00000185627	Wald ratio	1	-0.000161358	0.000359062	0.653152	-0.00086512	0.000542404	0.999839	0.999135	1.00054
6HShBQ	NVUC7S	Bladder cancer	PDPK1_ENSG00000140992	Wald ratio	1	-0.000236024	0.000339923	0.487466	-0.000902273	0.000430226	0.999764	0.999098	1.00043
6Kachu	NVUC7S	Bladder cancer	HLCS_ENSG00000159267	Inverse variance weighted	2	0.000279101	0.000274296	0.308908	-0.00025852	0.000816721	1.00028	0.999742	1.00082
6mqdYN	NVUC7S	Bladder cancer	CCDC40_ENSG00000141519	Wald ratio	1	-0.00030333	0.000252439	0.229521	-0.000798111	0.000191452	0.999697	0.999202	1.00019
6OOAu4	NVUC7S	Bladder cancer	ZNF559-ZNF177_ENSG00000270011	Inverse variance weighted	2	0.000100022	0.00024033	0.677275	-0.000371025	0.000571068	1.0001	0.999629	1.00057
6yMiRd	NVUC7S	Bladder cancer	DNAJC15_ENSG00000120675	Wald ratio	1	4.28294e-06	0.000181415	0.981165	-0.000351291	0.000359857	1	0.999649	1.00036
6zIQZr	NVUC7S	Bladder cancer	EFCAB2_ENSG00000203666	Wald ratio	1	-0.000394725	0.00038202	0.301483	-0.00114349	0.000354034	0.999605	0.998857	1.00035
6zvBwB	NVUC7S	Bladder cancer	SRA1_ENSG00000213523	MR Egger	3	-0.00160377	0.00569656	0.825292	-0.012769	0.00956148	0.998398	0.987312	1.00961
6zvBwB	NVUC7S	Bladder cancer	SRA1_ENSG00000213523	Weighted median	3	0.000293731	0.000251509	0.242856	-0.000199226	0.000786688	1.00029	0.999801	1.00079
6zvBwB	NVUC7S	Bladder cancer	SRA1_ENSG00000213523	Inverse variance weighted	3	0.00032383	0.000209452	0.122085	-8.66965e-05	0.000734356	1.00032	0.999913	1.00073
6zvBwB	NVUC7S	Bladder cancer	SRA1_ENSG00000213523	Simple mode	3	0.000279504	0.000273685	0.414553	-0.000256919	0.000815926	1.00028	0.999743	1.00082
6zvBwB	NVUC7S	Bladder cancer	SRA1_ENSG00000213523	Weighted mode	3	0.000279504	0.000261636	0.397248	-0.000233304	0.000792311	1.00028	0.999767	1.00079
7LwTp6	NVUC7S	Bladder cancer	CCDC144NL_ENSG00000205212	Wald ratio	1	0.000118255	0.000207858	0.569408	-0.000289147	0.000525657	1.00012	0.999711	1.00053
89yU3N	NVUC7S	Bladder cancer	ANKRD36_ENSG00000135976	MR Egger	6	-0.00012654	0.0012496	0.924213	-0.00257575	0.00232267	0.999873	0.997428	1.00233
89yU3N	NVUC7S	Bladder cancer	ANKRD36_ENSG00000135976	Weighted median	6	0.000501294	0.000208118	0.0160092	9.33837e-05	0.000909204	1.0005	1.00009	1.00091
89yU3N	NVUC7S	Bladder cancer	ANKRD36_ENSG00000135976	Inverse variance weighted	6	0.000552841	0.000166556	0.000902614	0.000226391	0.000879292	1.00055	1.00023	1.00088
89yU3N	NVUC7S	Bladder cancer	ANKRD36_ENSG00000135976	Simple mode	6	0.000484774	0.000258009	0.119044	-2.0923e-05	0.000990471	1.00048	0.999979	1.00099
89yU3N	NVUC7S	Bladder cancer	ANKRD36_ENSG00000135976	Weighted mode	6	0.000480833	0.000255421	0.118494	-1.97929e-05	0.000981459	1.00048	0.99998	1.00098
8DH4fX	NVUC7S	Bladder cancer	LINC01115_ENSG00000237667	Wald ratio	1	-7.66557e-05	0.000210542	0.715793	-0.000489318	0.000336007	0.999923	0.999511	1.00034
8hPAsz	NVUC7S	Bladder cancer	FIGNL1_ENSG00000132436	Wald ratio	1	-0.000314638	0.000270879	0.245419	-0.000845561	0.000216284	0.999685	0.999155	1.00022
8nvS74	NVUC7S	Bladder cancer	TTC12_ENSG00000149292	Wald ratio	1	0.000234458	0.00018207	0.197839	-0.0001224	0.000591316	1.00023	0.999878	1.00059
8POgWx	NVUC7S	Bladder cancer	TNS2_ENSG00000111077	Wald ratio	1	0.00029525	0.000296965	0.320113	-0.000286801	0.000877301	1.0003	0.999713	1.00088
9HRhzV	NVUC7S	Bladder cancer	POLD3_ENSG00000077514	Wald ratio	1	-0.000367529	0.000348075	0.291018	-0.00104975	0.000314698	0.999633	0.998951	1.00031
9OlvGb	NVUC7S	Bladder cancer	AC007040.2_ENSG00000258881	Wald ratio	1	-1.41383e-05	0.000285059	0.960443	-0.000572853	0.000544577	0.999986	0.999427	1.00054
9SxY33	NVUC7S	Bladder cancer	OR2M3_ENSG00000228198	Wald ratio	1	-6.42743e-05	0.000283859	0.820867	-0.000620639	0.00049209	0.999936	0.99938	1.00049
9yc79s	NVUC7S	Bladder cancer	CLHC1_ENSG00000162994	Wald ratio	1	9.20866e-05	0.000228631	0.687115	-0.000356031	0.000540204	1.00009	0.999644	1.00054
9zS36v	NVUC7S	Bladder cancer	UVSSA_ENSG00000163945	Wald ratio	1	-0.000124054	0.000319048	0.697405	-0.000749388	0.00050128	0.999876	0.999251	1.0005
A3zIo9	NVUC7S	Bladder cancer	SPINK9_ENSG00000204909	Wald ratio	1	0.000161319	0.000344723	0.639809	-0.000514339	0.000836977	1.00016	0.999486	1.00084
A6Jhu5	NVUC7S	Bladder cancer	IQCB1_ENSG00000173226	Inverse variance weighted	2	0.000338509	0.000237655	0.154338	-0.000127294	0.000804313	1.00034	0.999873	1.0008
AA3LPb	NVUC7S	Bladder cancer	BICC1_ENSG00000122870	Wald ratio	1	-0.000322389	0.000211616	0.127642	-0.000737156	9.23776e-05	0.999678	0.999263	1.00009
AdWZgA	NVUC7S	Bladder cancer	CTBS_ENSG00000117151	Wald ratio	1	0.000105537	0.000308906	0.732617	-0.000499919	0.000710993	1.00011	0.9995	1.00071
akuMkH	NVUC7S	Bladder cancer	AK3_ENSG00000147853	Wald ratio	1	0.00058666	0.000321645	0.0681622	-4.37653e-05	0.00121709	1.00059	0.999956	1.00122
amWcHJ	NVUC7S	Bladder cancer	C9orf72_ENSG00000147894	Wald ratio	1	0.000238614	0.000265759	0.369263	-0.000282275	0.000759502	1.00024	0.999718	1.00076
AoSm8T	NVUC7S	Bladder cancer	LINC02482_ENSG00000251580	Wald ratio	1	0.000195491	0.000410507	0.633919	-0.000609103	0.00100008	1.0002	0.999391	1.001
az9uHc	NVUC7S	Bladder cancer	INPP5B_ENSG00000204084	Inverse variance weighted	2	-0.000540382	0.000295462	0.0674086	-0.00111949	3.87233e-05	0.99946	0.998881	1.00004
B6OXx6	NVUC7S	Bladder cancer	MRAS_ENSG00000158186	Wald ratio	1	0.000153705	0.000359916	0.669337	-0.00055173	0.000859139	1.00015	0.999448	1.00086
BEehPv	NVUC7S	Bladder cancer	GSTM3_ENSG00000134202	Wald ratio	1	-0.000224721	0.000380577	0.554872	-0.000970652	0.000521209	0.999775	0.99903	1.00052
BESvTz	NVUC7S	Bladder cancer	RFTN1_ENSG00000131378	Wald ratio	1	0.000282444	0.000304484	0.353607	-0.000314345	0.000879233	1.00028	0.999686	1.00088
BFzISY	NVUC7S	Bladder cancer	ADAL_ENSG00000168803	MR Egger	3	0.000370247	0.00406896	0.942231	-0.00760491	0.0083454	1.00037	0.992424	1.00838
BFzISY	NVUC7S	Bladder cancer	ADAL_ENSG00000168803	Weighted median	3	0.000107815	0.000214365	0.615001	-0.000312341	0.000527971	1.00011	0.999688	1.00053
BFzISY	NVUC7S	Bladder cancer	ADAL_ENSG00000168803	Inverse variance weighted	3	0.000100942	0.00018872	0.592736	-0.00026895	0.000470834	1.0001	0.999731	1.00047
BFzISY	NVUC7S	Bladder cancer	ADAL_ENSG00000168803	Simple mode	3	0.000109222	0.000243871	0.698087	-0.000368764	0.000587208	1.00011	0.999631	1.00059
BFzISY	NVUC7S	Bladder cancer	ADAL_ENSG00000168803	Weighted mode	3	0.000109519	0.000242169	0.69541	-0.000365131	0.00058417	1.00011	0.999635	1.00058
BN90Z7	NVUC7S	Bladder cancer	LY6G5C_ENSG00000204428	Wald ratio	1	0.000118345	0.000284004	0.676897	-0.000438303	0.000674992	1.00012	0.999562	1.00068
BooOCs	NVUC7S	Bladder cancer	C20orf96_ENSG00000196476	Wald ratio	1	-0.000584056	0.000328492	0.0754054	-0.0012279	5.97888e-05	0.999416	0.998773	1.00006
BqVcU2	NVUC7S	Bladder cancer	MFSD13A_ENSG00000138111	Inverse variance weighted	2	-5.60692e-05	0.000193006	0.77143	-0.000434361	0.000322222	0.999944	0.999566	1.00032
bv2zqp	NVUC7S	Bladder cancer	TTC32_ENSG00000183891	Wald ratio	1	2.14246e-05	0.000346498	0.950697	-0.000657712	0.000700561	1.00002	0.999343	1.0007
bwsU2C	NVUC7S	Bladder cancer	LSM6_ENSG00000164167	Wald ratio	1	7.56766e-05	0.000367264	0.836748	-0.00064416	0.000795513	1.00008	0.999356	1.0008
BX0d6S	NVUC7S	Bladder cancer	AL589843.1_ENSG00000224848	MR Egger	3	-0.000902873	0.0015782	0.669183	-0.00399614	0.00219039	0.999098	0.996012	1.00219
BX0d6S	NVUC7S	Bladder cancer	AL589843.1_ENSG00000224848	Weighted median	3	0.000315579	0.00017523	0.0717117	-2.78713e-05	0.00065903	1.00032	0.999972	1.00066
BX0d6S	NVUC7S	Bladder cancer	AL589843.1_ENSG00000224848	Inverse variance weighted	3	0.000257985	0.00014296	0.0711384	-2.2217e-05	0.000538187	1.00026	0.999978	1.00054
BX0d6S	NVUC7S	Bladder cancer	AL589843.1_ENSG00000224848	Simple mode	3	0.000342102	0.000214372	0.251589	-7.80676e-05	0.000762271	1.00034	0.999922	1.00076
BX0d6S	NVUC7S	Bladder cancer	AL589843.1_ENSG00000224848	Weighted mode	3	0.000333914	0.000203143	0.241951	-6.42464e-05	0.000732075	1.00033	0.999936	1.00073
CA4HrL	NVUC7S	Bladder cancer	NPIPB13_ENSG00000198064	Wald ratio	1	-0.000785756	0.000460257	0.0877829	-0.00168786	0.000116348	0.999215	0.998314	1.00012
CdJO0R	NVUC7S	Bladder cancer	APTX_ENSG00000137074	Wald ratio	1	8.42986e-05	0.000272027	0.756644	-0.000448874	0.000617472	1.00008	0.999551	1.00062
cEsKq4	NVUC7S	Bladder cancer	TAF1C_ENSG00000103168	Wald ratio	1	0.000104929	0.000309757	0.734801	-0.000502195	0.000712053	1.0001	0.999498	1.00071
CHcR0a	NVUC7S	Bladder cancer	ECM2_ENSG00000106823	MR Egger	5	-0.00192563	0.00219759	0.4454	-0.00623291	0.00238165	0.998076	0.993786	1.00238
CHcR0a	NVUC7S	Bladder cancer	ECM2_ENSG00000106823	Weighted median	5	-0.000129608	0.000234285	0.580121	-0.000588806	0.00032959	0.99987	0.999411	1.00033
CHcR0a	NVUC7S	Bladder cancer	ECM2_ENSG00000106823	Inverse variance weighted	5	-1.76237e-05	0.000189712	0.925985	-0.000389458	0.000354211	0.999982	0.999611	1.00035
CHcR0a	NVUC7S	Bladder cancer	ECM2_ENSG00000106823	Simple mode	5	-0.000155858	0.000327942	0.659389	-0.000798625	0.000486908	0.999844	0.999202	1.00049
CHcR0a	NVUC7S	Bladder cancer	ECM2_ENSG00000106823	Weighted mode	5	-0.000156973	0.000302475	0.631177	-0.000749825	0.000435878	0.999843	0.99925	1.00044
chq6AH	NVUC7S	Bladder cancer	RAB27A_ENSG00000069974	Wald ratio	1	0.000105674	0.000332491	0.750617	-0.000546007	0.000757356	1.00011	0.999454	1.00076
CizGSk	NVUC7S	Bladder cancer	ADAMTS20_ENSG00000173157	Inverse variance weighted	2	-0.000101364	0.000196139	0.605298	-0.000485796	0.000283068	0.999899	0.999514	1.00028
CLrLvK	NVUC7S	Bladder cancer	DDX11_ENSG00000013573	Wald ratio	1	-4.20886e-05	0.000169208	0.803563	-0.000373736	0.000289559	0.999958	0.999626	1.00029
cLsztn	NVUC7S	Bladder cancer	B3GNTL1_ENSG00000175711	Wald ratio	1	-0.000138595	0.000285335	0.627161	-0.000697852	0.000420662	0.999861	0.999302	1.00042
DAkRES	NVUC7S	Bladder cancer	AC010615.4_ENSG00000269237	MR Egger	3	-0.000593033	0.00240372	0.846012	-0.00530433	0.00411827	0.999407	0.99471	1.00413
DAkRES	NVUC7S	Bladder cancer	AC010615.4_ENSG00000269237	Weighted median	3	0.00020437	0.000150819	0.175395	-9.12351e-05	0.000499976	1.0002	0.999909	1.0005
DAkRES	NVUC7S	Bladder cancer	AC010615.4_ENSG00000269237	Inverse variance weighted	3	0.000116872	0.000145835	0.4229	-0.000168964	0.000402708	1.00012	0.999831	1.0004
DAkRES	NVUC7S	Bladder cancer	AC010615.4_ENSG00000269237	Simple mode	3	0.000263467	0.000216957	0.348532	-0.00016177	0.000688703	1.00026	0.999838	1.00069
DAkRES	NVUC7S	Bladder cancer	AC010615.4_ENSG00000269237	Weighted mode	3	0.000276696	0.000232657	0.356382	-0.000179313	0.000732704	1.00028	0.999821	1.00073
daKwzE	NVUC7S	Bladder cancer	AC027020.2_ENSG00000270127	Wald ratio	1	0.000232925	0.000285007	0.413779	-0.000325689	0.000791539	1.00023	0.999674	1.00079
dgCdAW	NVUC7S	Bladder cancer	WBP2NL_ENSG00000183066	Inverse variance weighted	2	8.06325e-05	0.00021769	0.711084	-0.00034604	0.000507305	1.00008	0.999654	1.00051
DHGX23	NVUC7S	Bladder cancer	PHACTR4_ENSG00000204138	MR Egger	3	0.000419748	0.00208817	0.873715	-0.00367306	0.00451256	1.00042	0.996334	1.00452
DHGX23	NVUC7S	Bladder cancer	PHACTR4_ENSG00000204138	Weighted median	3	-0.000620051	0.00025333	0.0143811	-0.00111658	-0.000123524	0.99938	0.998884	0.999876
DHGX23	NVUC7S	Bladder cancer	PHACTR4_ENSG00000204138	Inverse variance weighted	3	-0.000665859	0.000218075	0.002263	-0.00109328	-0.000238432	0.999334	0.998907	0.999762
DHGX23	NVUC7S	Bladder cancer	PHACTR4_ENSG00000204138	Simple mode	3	-0.000606127	0.000298516	0.17942	-0.00119122	-2.10356e-05	0.999394	0.998809	0.999979
DHGX23	NVUC7S	Bladder cancer	PHACTR4_ENSG00000204138	Weighted mode	3	-0.000603614	0.000286298	0.169526	-0.00116476	-4.24698e-05	0.999397	0.998836	0.999958
DL1ERX	NVUC7S	Bladder cancer	XRRA1_ENSG00000166435	Wald ratio	1	0.000127672	0.000153766	0.406368	-0.000173709	0.000429054	1.00013	0.999826	1.00043
dmKUaM	NVUC7S	Bladder cancer	SNX8_ENSG00000106266	Wald ratio	1	-2.73728e-05	0.000237675	0.908311	-0.000493216	0.00043847	0.999973	0.999507	1.00044
DswKPV	NVUC7S	Bladder cancer	ALG8_ENSG00000159063	Wald ratio	1	-0.000101938	0.00031956	0.74973	-0.000728276	0.000524399	0.999898	0.999272	1.00052
DtLxLf	NVUC7S	Bladder cancer	ANKRD30BL_ENSG00000163046	Wald ratio	1	3.97834e-05	0.000352694	0.91019	-0.000651497	0.000731064	1.00004	0.999349	1.00073
DWJ7gY	NVUC7S	Bladder cancer	ATP6AP1L_ENSG00000205464	MR Egger	3	2.2584e-05	0.00129313	0.988883	-0.00251195	0.00255711	1.00002	0.997491	1.00256
DWJ7gY	NVUC7S	Bladder cancer	ATP6AP1L_ENSG00000205464	Weighted median	3	0.000106041	0.000131096	0.418584	-0.000150907	0.000362988	1.00011	0.999849	1.00036
DWJ7gY	NVUC7S	Bladder cancer	ATP6AP1L_ENSG00000205464	Inverse variance weighted	3	7.75351e-05	0.000116987	0.50748	-0.000151759	0.000306829	1.00008	0.999848	1.00031
DWJ7gY	NVUC7S	Bladder cancer	ATP6AP1L_ENSG00000205464	Simple mode	3	0.000125855	0.000166558	0.528744	-0.000200599	0.000452308	1.00013	0.999799	1.00045
DWJ7gY	NVUC7S	Bladder cancer	ATP6AP1L_ENSG00000205464	Weighted mode	3	0.000125197	0.000154886	0.503769	-0.000178378	0.000428773	1.00013	0.999822	1.00043
Dyi1l6	NVUC7S	Bladder cancer	RSU1_ENSG00000148484	Wald ratio	1	-0.000192042	0.00028211	0.496039	-0.000744978	0.000360893	0.999808	0.999255	1.00036
DYiuQx	NVUC7S	Bladder cancer	PDGFRL_ENSG00000104213	Wald ratio	1	0.000465596	0.000273902	0.0891566	-7.12518e-05	0.00100244	1.00047	0.999929	1.001
eaZeyp	NVUC7S	Bladder cancer	PWRN1_ENSG00000259905	Wald ratio	1	-0.000331773	0.000712181	0.641319	-0.00172765	0.0010641	0.999668	0.998274	1.00106
EcUwG7	NVUC7S	Bladder cancer	DRAM2_ENSG00000156171	Wald ratio	1	-0.000475207	0.000306824	0.121431	-0.00107658	0.000126167	0.999525	0.998924	1.00013
Ecwie4	NVUC7S	Bladder cancer	OR2L13_ENSG00000196071	Wald ratio	1	-7.26264e-05	0.000253869	0.774818	-0.00057021	0.000424957	0.999927	0.99943	1.00043
eHxMc5	NVUC7S	Bladder cancer	AC093151.3_ENSG00000235358	Wald ratio	1	0.000110236	0.000227846	0.628514	-0.000336342	0.000556815	1.00011	0.999664	1.00056
EjO8Ed	NVUC7S	Bladder cancer	SMC2_ENSG00000136824	Inverse variance weighted	2	0.000337592	0.000219645	0.124297	-9.2913e-05	0.000768096	1.00034	0.999907	1.00077
eNnME3	NVUC7S	Bladder cancer	CENPP_ENSG00000188312	MR Egger	6	-0.000366683	0.000460974	0.470885	-0.00127019	0.000536827	0.999633	0.998731	1.00054
eNnME3	NVUC7S	Bladder cancer	CENPP_ENSG00000188312	Weighted median	6	-6.44436e-05	0.000108674	0.553181	-0.000277444	0.000148557	0.999936	0.999723	1.00015
eNnME3	NVUC7S	Bladder cancer	CENPP_ENSG00000188312	Inverse variance weighted	6	6.00466e-06	8.77436e-05	0.94544	-0.000165973	0.000177982	1.00001	0.999834	1.00018
eNnME3	NVUC7S	Bladder cancer	CENPP_ENSG00000188312	Simple mode	6	-5.67471e-05	0.000141299	0.704561	-0.000333693	0.000220199	0.999943	0.999666	1.00022
eNnME3	NVUC7S	Bladder cancer	CENPP_ENSG00000188312	Weighted mode	6	-6.27155e-05	0.000143299	0.679895	-0.000343581	0.00021815	0.999937	0.999656	1.00022
EqTVjU	NVUC7S	Bladder cancer	RPIA_ENSG00000153574	Inverse variance weighted	2	0.000230233	0.000178932	0.198197	-0.000120474	0.00058094	1.00023	0.99988	1.00058
eSvY1q	NVUC7S	Bladder cancer	AC005154.5_ENSG00000281039	Wald ratio	1	-0.000403597	0.000285652	0.157686	-0.000963476	0.000156281	0.999596	0.999037	1.00016
ESxFSh	NVUC7S	Bladder cancer	GSTT2B_ENSG00000133433	Wald ratio	1	-0.000311848	0.00026353	0.236671	-0.000828366	0.00020467	0.999688	0.999172	1.0002
eyJNwN	NVUC7S	Bladder cancer	DPH1_ENSG00000108963	Wald ratio	1	-0.000258925	0.000252221	0.304617	-0.000753278	0.000235428	0.999741	0.999247	1.00024
F1BmVU	NVUC7S	Bladder cancer	OR2L3_ENSG00000198128	Wald ratio	1	-4.11864e-05	0.000181895	0.820867	-0.0003977	0.000315327	0.999959	0.999602	1.00032
f1mxWz	NVUC7S	Bladder cancer	PLEC_ENSG00000178209	Wald ratio	1	-0.000170814	0.000466873	0.714463	-0.00108589	0.000744258	0.999829	0.998915	1.00074
F9SkCQ	NVUC7S	Bladder cancer	Z99774.1_ENSG00000206028	Wald ratio	1	6.62517e-05	0.000344686	0.847579	-0.000609332	0.000741836	1.00007	0.999391	1.00074
fcHVK8	NVUC7S	Bladder cancer	AC233280.1_ENSG00000229178	Wald ratio	1	0.000371323	0.000368917	0.314164	-0.000351754	0.0010944	1.00037	0.999648	1.0011
FcYh6T	NVUC7S	Bladder cancer	DSCC1_ENSG00000136982	Wald ratio	1	-9.66363e-05	0.0002488	0.697713	-0.000584284	0.000391012	0.999903	0.999416	1.00039
FdTZ8w	NVUC7S	Bladder cancer	CA8_ENSG00000178538	Wald ratio	1	0.000360704	0.000239022	0.131278	-0.00010778	0.000829188	1.00036	0.999892	1.00083
FFqx7K	NVUC7S	Bladder cancer	NQO2_ENSG00000124588	Wald ratio	1	0.00046337	0.000358263	0.19588	-0.000238826	0.00116557	1.00046	0.999761	1.00117
FhAJAa	NVUC7S	Bladder cancer	FN3K_ENSG00000167363	Wald ratio	1	0.000767229	0.000396471	0.0529726	-9.85454e-06	0.00154431	1.00077	0.99999	1.00155
FIn2UM	NVUC7S	Bladder cancer	SCGB2B2_ENSG00000205209	Wald ratio	1	-4.03874e-06	0.000389235	0.991721	-0.00076694	0.000758863	0.999996	0.999233	1.00076
FmHrlQ	NVUC7S	Bladder cancer	CDC7_ENSG00000097046	Wald ratio	1	5.04009e-05	0.000244033	0.836374	-0.000427904	0.000528706	1.00005	0.999572	1.00053
FOidrZ	NVUC7S	Bladder cancer	XKR6_ENSG00000171044	Inverse variance weighted	2	-0.000641064	0.000438535	0.143787	-0.00150059	0.000218464	0.999359	0.998501	1.00022
FRni0B	NVUC7S	Bladder cancer	TPTEP2-CSNK1E_ENSG00000283900	Wald ratio	1	0.000518971	0.000326313	0.111743	-0.000120603	0.00115855	1.00052	0.999879	1.00116
fRUOQv	NVUC7S	Bladder cancer	CRYBG1_ENSG00000112297	Wald ratio	1	-0.000522736	0.000328033	0.111038	-0.00116568	0.00012021	0.999477	0.998835	1.00012
FU38lD	NVUC7S	Bladder cancer	FIGN_ENSG00000182263	Wald ratio	1	0.000908292	0.00055449	0.101407	-0.000178508	0.00199509	1.00091	0.999822	1.002
fW0uLE	NVUC7S	Bladder cancer	GNB3_ENSG00000111664	Wald ratio	1	-0.000112983	0.000341541	0.740792	-0.000782404	0.000556438	0.999887	0.999218	1.00056
Fw2nif	NVUC7S	Bladder cancer	FARP2_ENSG00000006607	Wald ratio	1	0.000433261	0.00029608	0.143378	-0.000147055	0.00101358	1.00043	0.999853	1.00101
g76fjP	NVUC7S	Bladder cancer	C1QTNF7_ENSG00000163145	Wald ratio	1	0.000584582	0.000338907	0.0845447	-7.96755e-05	0.00124884	1.00058	0.99992	1.00125
gDkjft	NVUC7S	Bladder cancer	DCT_ENSG00000080166	Wald ratio	1	0.000270475	0.00025529	0.289381	-0.000229893	0.000770842	1.00027	0.99977	1.00077
gggyHM	NVUC7S	Bladder cancer	SUMF1_ENSG00000144455	Wald ratio	1	-5.21159e-05	0.000308546	0.865869	-0.000656866	0.000552634	0.999948	0.999343	1.00055
gHhgVt	NVUC7S	Bladder cancer	AC011478.1_ENSG00000267760	Wald ratio	1	-0.000266188	0.00031214	0.393779	-0.000877982	0.000345606	0.999734	0.999122	1.00035
gHUgtH	NVUC7S	Bladder cancer	CERS5_ENSG00000139624	Inverse variance weighted	2	-8.00044e-05	0.000182866	0.661747	-0.000438421	0.000278413	0.99992	0.999562	1.00028
gK4QTB	NVUC7S	Bladder cancer	AC090403.1_ENSG00000264151	Wald ratio	1	-0.000128093	0.000185088	0.488897	-0.000490865	0.00023468	0.999872	0.999509	1.00023
GS7Mwo	NVUC7S	Bladder cancer	OGN_ENSG00000106809	Inverse variance weighted	2	-0.000140605	0.000256332	0.583331	-0.000643017	0.000361806	0.999859	0.999357	1.00036
gUzlPf	NVUC7S	Bladder cancer	SFXN4_ENSG00000183605	Wald ratio	1	7.35175e-05	0.000229898	0.749132	-0.000377082	0.000524117	1.00007	0.999623	1.00052
Gvgn5c	NVUC7S	Bladder cancer	TOGARAM2_ENSG00000189350	Inverse variance weighted	2	2.49305e-05	0.000116356	0.830344	-0.000203127	0.000252988	1.00002	0.999797	1.00025
h2bTeB	NVUC7S	Bladder cancer	ITGA1_ENSG00000213949	Wald ratio	1	-0.000430313	0.000360116	0.232116	-0.00113614	0.000275515	0.99957	0.998865	1.00028
HbhmIv	NVUC7S	Bladder cancer	PRPH2_ENSG00000112619	Inverse variance weighted	2	5.10305e-05	0.000200248	0.798849	-0.000341455	0.000443516	1.00005	0.999659	1.00044
hEDutw	NVUC7S	Bladder cancer	SNRPF_ENSG00000139343	Wald ratio	1	-0.000194081	0.000297148	0.513662	-0.000776491	0.000388329	0.999806	0.999224	1.00039
hhst6Q	NVUC7S	Bladder cancer	PHC2_ENSG00000134686	Wald ratio	1	-0.000339805	0.000393553	0.387902	-0.00111117	0.000431559	0.99966	0.998889	1.00043
HKf5I2	NVUC7S	Bladder cancer	WDR73_ENSG00000177082	Wald ratio	1	5.87076e-05	0.00050435	0.907334	-0.000929818	0.00104723	1.00006	0.999071	1.00105
hLSSP3	NVUC7S	Bladder cancer	CCDC90B_ENSG00000137500	Wald ratio	1	0.000572721	0.000476489	0.229378	-0.000361197	0.00150664	1.00057	0.999639	1.00151
HnGJWe	NVUC7S	Bladder cancer	RHD_ENSG00000187010	Wald ratio	1	-5.59681e-05	0.000210322	0.790157	-0.0004682	0.000356264	0.999944	0.999532	1.00036
hOVRYM	NVUC7S	Bladder cancer	TPCN2_ENSG00000162341	Wald ratio	1	0.000480169	0.000400553	0.230619	-0.000304915	0.00126525	1.00048	0.999695	1.00127
HQlHQv	NVUC7S	Bladder cancer	AC010967.1_ENSG00000228033	Wald ratio	1	5.24458e-05	0.000330929	0.874078	-0.000596174	0.000701066	1.00005	0.999404	1.0007
htDNkO	NVUC7S	Bladder cancer	GAS8_ENSG00000141013	MR Egger	4	0.000247997	0.00174639	0.90009	-0.00317493	0.00367093	1.00025	0.99683	1.00368
htDNkO	NVUC7S	Bladder cancer	GAS8_ENSG00000141013	Weighted median	4	-0.000129871	0.000120422	0.280828	-0.000365898	0.000106157	0.99987	0.999634	1.00011
htDNkO	NVUC7S	Bladder cancer	GAS8_ENSG00000141013	Inverse variance weighted	4	-0.000121545	0.000109283	0.266051	-0.000335739	9.26496e-05	0.999878	0.999664	1.00009
htDNkO	NVUC7S	Bladder cancer	GAS8_ENSG00000141013	Simple mode	4	-0.000158068	0.00016781	0.415712	-0.000486976	0.00017084	0.999842	0.999513	1.00017
htDNkO	NVUC7S	Bladder cancer	GAS8_ENSG00000141013	Weighted mode	4	-0.000150155	0.000151276	0.394078	-0.000446657	0.000146346	0.99985	0.999553	1.00015
hVtiF1	NVUC7S	Bladder cancer	LINS1_ENSG00000140471	Wald ratio	1	0.000284257	0.000347816	0.413779	-0.000397463	0.000965977	1.00028	0.999603	1.00097
HwJalg	NVUC7S	Bladder cancer	CCDC32_ENSG00000128891	MR Egger	4	0.00141094	0.0020349	0.559777	-0.00257747	0.00539934	1.00141	0.997426	1.00541
HwJalg	NVUC7S	Bladder cancer	CCDC32_ENSG00000128891	Weighted median	4	-0.000222528	0.000141707	0.116336	-0.000500273	5.52174e-05	0.999777	0.9995	1.00006
HwJalg	NVUC7S	Bladder cancer	CCDC32_ENSG00000128891	Inverse variance weighted	4	-0.000233837	0.000131404	0.0751525	-0.000491389	2.37141e-05	0.999766	0.999509	1.00002
HwJalg	NVUC7S	Bladder cancer	CCDC32_ENSG00000128891	Simple mode	4	-0.000205277	0.000211307	0.402972	-0.00061944	0.000208885	0.999795	0.999381	1.00021
HwJalg	NVUC7S	Bladder cancer	CCDC32_ENSG00000128891	Weighted mode	4	-0.000207086	0.000198998	0.374535	-0.000597121	0.000182949	0.999793	0.999403	1.00018
I1m6p9	NVUC7S	Bladder cancer	JAM2_ENSG00000154721	Wald ratio	1	-0.000465655	0.000261679	0.0751589	-0.000978545	4.72347e-05	0.999534	0.999022	1.00005
Icaq4m	NVUC7S	Bladder cancer	KCNN4_ENSG00000104783	Wald ratio	1	-4.27195e-06	0.000240797	0.985846	-0.000476234	0.00046769	0.999996	0.999524	1.00047
IfxB35	NVUC7S	Bladder cancer	PAH_ENSG00000171759	Wald ratio	1	0.000349975	0.000228179	0.125085	-9.72555e-05	0.000797205	1.00035	0.999903	1.0008
IgqIDN	NVUC7S	Bladder cancer	MAP2K5_ENSG00000137764	Inverse variance weighted	2	6.87869e-05	0.000247576	0.781134	-0.000416462	0.000554035	1.00007	0.999584	1.00055
IHzeED	NVUC7S	Bladder cancer	ARL17B_ENSG00000228696	MR Egger	8	-0.000143553	0.000251911	0.589458	-0.000637298	0.000350192	0.999856	0.999363	1.00035
IHzeED	NVUC7S	Bladder cancer	ARL17B_ENSG00000228696	Weighted median	8	6.16063e-05	5.69249e-05	0.279147	-4.99666e-05	0.000173179	1.00006	0.99995	1.00017
IHzeED	NVUC7S	Bladder cancer	ARL17B_ENSG00000228696	Inverse variance weighted	8	7.96709e-05	4.67622e-05	0.0884285	-1.1983e-05	0.000171325	1.00008	0.999988	1.00017
IHzeED	NVUC7S	Bladder cancer	ARL17B_ENSG00000228696	Simple mode	8	5.88667e-05	7.90593e-05	0.480764	-9.60895e-05	0.000213823	1.00006	0.999904	1.00021
IHzeED	NVUC7S	Bladder cancer	ARL17B_ENSG00000228696	Weighted mode	8	5.88667e-05	7.60883e-05	0.464451	-9.02664e-05	0.000208	1.00006	0.99991	1.00021
ikEJ7u	NVUC7S	Bladder cancer	LRRC37A2_ENSG00000238083	MR Egger	8	-0.000213969	0.000399625	0.611611	-0.000997234	0.000569297	0.999786	0.999003	1.00057
ikEJ7u	NVUC7S	Bladder cancer	LRRC37A2_ENSG00000238083	Weighted median	8	8.02857e-05	7.05255e-05	0.254957	-5.79443e-05	0.000218516	1.00008	0.999942	1.00022
ikEJ7u	NVUC7S	Bladder cancer	LRRC37A2_ENSG00000238083	Inverse variance weighted	8	9.7182e-05	5.91112e-05	0.100165	-1.8676e-05	0.00021304	1.0001	0.999981	1.00021
ikEJ7u	NVUC7S	Bladder cancer	LRRC37A2_ENSG00000238083	Simple mode	8	7.83047e-05	0.000107793	0.491142	-0.000132969	0.000289579	1.00008	0.999867	1.00029
ikEJ7u	NVUC7S	Bladder cancer	LRRC37A2_ENSG00000238083	Weighted mode	8	7.7822e-05	9.3663e-05	0.433468	-0.000105758	0.000261402	1.00008	0.999894	1.00026
ilPOtX	NVUC7S	Bladder cancer	INTS10_ENSG00000104613	Wald ratio	1	-4.76271e-05	0.000421598	0.910056	-0.000873959	0.000778705	0.999952	0.999126	1.00078
ISaaT4	NVUC7S	Bladder cancer	COQ9_ENSG00000088682	Wald ratio	1	0.000138387	0.000326311	0.671497	-0.000501182	0.000777955	1.00014	0.999499	1.00078
IVJM19	NVUC7S	Bladder cancer	ZSCAN31_ENSG00000235109	MR Egger	4	0.000115417	0.000766369	0.894107	-0.00138667	0.0016175	1.00012	0.998614	1.00162
IVJM19	NVUC7S	Bladder cancer	ZSCAN31_ENSG00000235109	Weighted median	4	1.83402e-05	0.00012306	0.881526	-0.000222858	0.000259538	1.00002	0.999777	1.00026
IVJM19	NVUC7S	Bladder cancer	ZSCAN31_ENSG00000235109	Inverse variance weighted	4	1.88996e-05	0.000109094	0.862462	-0.000194924	0.000232724	1.00002	0.999805	1.00023
IVJM19	NVUC7S	Bladder cancer	ZSCAN31_ENSG00000235109	Simple mode	4	-1.62522e-06	0.000152286	0.992155	-0.000300106	0.000296856	0.999998	0.9997	1.0003
IVJM19	NVUC7S	Bladder cancer	ZSCAN31_ENSG00000235109	Weighted mode	4	2.09375e-05	0.000152895	0.899751	-0.000278737	0.000320612	1.00002	0.999721	1.00032
iyC0GG	NVUC7S	Bladder cancer	VARS2_ENSG00000137411	Wald ratio	1	-3.34973e-05	0.000301195	0.911446	-0.000623839	0.000556844	0.999967	0.999376	1.00056
j2LTfT	NVUC7S	Bladder cancer	OR2L2_ENSG00000203663	Wald ratio	1	-6.99366e-05	0.00027765	0.801128	-0.000614131	0.000474258	0.99993	0.999386	1.00047
jd85XD	NVUC7S	Bladder cancer	ZNF100_ENSG00000197020	Wald ratio	1	0.000257188	0.000202546	0.204163	-0.000139801	0.000654178	1.00026	0.99986	1.00065
K4Vzmb	NVUC7S	Bladder cancer	HINT3_ENSG00000111911	Wald ratio	1	1.56349e-05	0.000477939	0.973903	-0.000921126	0.000952396	1.00002	0.999079	1.00095
k9jPLf	NVUC7S	Bladder cancer	AC124657.1_ENSG00000254532	Wald ratio	1	0.000200086	0.00024766	0.419146	-0.000285328	0.0006855	1.0002	0.999715	1.00069
kBBwcS	NVUC7S	Bladder cancer	AC006504.2_ENSG00000266977	Wald ratio	1	-0.000626124	0.000349155	0.072932	-0.00131047	5.82195e-05	0.999374	0.99869	1.00006
kEOn79	NVUC7S	Bladder cancer	SPATA7_ENSG00000042317	MR Egger	4	0.0267828	0.0361249	0.535691	-0.0440221	0.0975877	1.02714	0.956933	1.10251
kEOn79	NVUC7S	Bladder cancer	SPATA7_ENSG00000042317	Weighted median	4	-0.000123603	0.000131453	0.347074	-0.000381252	0.000134046	0.999876	0.999619	1.00013
kEOn79	NVUC7S	Bladder cancer	SPATA7_ENSG00000042317	Inverse variance weighted	4	-8.53608e-05	0.000115533	0.460002	-0.000311805	0.000141084	0.999915	0.999688	1.00014
kEOn79	NVUC7S	Bladder cancer	SPATA7_ENSG00000042317	Simple mode	4	-0.000128995	0.00018173	0.529016	-0.000485187	0.000227196	0.999871	0.999515	1.00023
kEOn79	NVUC7S	Bladder cancer	SPATA7_ENSG00000042317	Weighted mode	4	-0.000130545	0.000184034	0.529265	-0.000491252	0.000230161	0.999869	0.999509	1.00023
kFaF7B	NVUC7S	Bladder cancer	FTCD_ENSG00000160282	Wald ratio	1	-0.000118736	0.000241177	0.622493	-0.000591443	0.000353971	0.999881	0.999409	1.00035
KFBBLt	NVUC7S	Bladder cancer	AL513548.1_ENSG00000261584	Wald ratio	1	0.00013573	0.000361795	0.707545	-0.000573389	0.000844849	1.00014	0.999427	1.00085
ki3Cco	NVUC7S	Bladder cancer	SEC22A_ENSG00000121542	Wald ratio	1	-0.000360802	0.000376737	0.338213	-0.00109921	0.000377603	0.999639	0.998901	1.00038
klKdlR	NVUC7S	Bladder cancer	GATD3A_ENSG00000160221	Wald ratio	1	0.000144628	0.000216488	0.504093	-0.000279689	0.000568945	1.00014	0.99972	1.00057
kMR8WR	NVUC7S	Bladder cancer	AMH_ENSG00000104899	Wald ratio	1	0.000168491	0.000186503	0.366303	-0.000197056	0.000534038	1.00017	0.999803	1.00053
kRG76k	NVUC7S	Bladder cancer	CHRFAM7A_ENSG00000166664	Inverse variance weighted	2	0.000328305	0.00022046	0.136439	-0.000103797	0.000760408	1.00033	0.999896	1.00076
KsaCrL	NVUC7S	Bladder cancer	LAMC1_ENSG00000135862	Wald ratio	1	-4.60453e-05	0.00035887	0.897907	-0.000749431	0.000657341	0.999954	0.999251	1.00066
KSc9PD	NVUC7S	Bladder cancer	TRMT10B_ENSG00000165275	Wald ratio	1	-0.000957365	0.000813806	0.239433	-0.00255243	0.000637695	0.999043	0.997451	1.00064
kvaPbq	NVUC7S	Bladder cancer	IGFL4_ENSG00000204869	Wald ratio	1	7.84163e-05	0.000224371	0.726718	-0.00036135	0.000518183	1.00008	0.999639	1.00052
Kxyh3n	NVUC7S	Bladder cancer	PILRB_ENSG00000121716	Inverse variance weighted	2	-0.000275731	0.000196577	0.160718	-0.000661022	0.00010956	0.999724	0.999339	1.00011
KYRDOM	NVUC7S	Bladder cancer	LINC02652_ENSG00000237128	Inverse variance weighted	2	0.000289818	0.000205734	0.158924	-0.000113422	0.000693057	1.00029	0.999887	1.00069
Lbe12i	NVUC7S	Bladder cancer	U2AF1_ENSG00000160201	Wald ratio	1	5.54399e-05	0.000182922	0.76183	-0.000303087	0.000413967	1.00006	0.999697	1.00041
lbJ45Z	NVUC7S	Bladder cancer	AC104964.1_ENSG00000253641	Wald ratio	1	-0.000179416	0.000311408	0.564518	-0.000789775	0.000430944	0.999821	0.999211	1.00043
LFHncE	NVUC7S	Bladder cancer	HDHD3_ENSG00000119431	Wald ratio	1	0.000328335	0.000513625	0.52266	-0.00067837	0.00133504	1.00033	0.999322	1.00134
lhYgxF	NVUC7S	Bladder cancer	RNASEL_ENSG00000135828	Wald ratio	1	0.000228359	0.000273456	0.403669	-0.000307614	0.000764333	1.00023	0.999692	1.00076
Ljak8k	NVUC7S	Bladder cancer	FOXRED2_ENSG00000100350	Inverse variance weighted	2	0.000330947	0.000266472	0.214252	-0.000191338	0.000853232	1.00033	0.999809	1.00085
lJCf7U	NVUC7S	Bladder cancer	AC244131.2_ENSG00000275119	MR Egger	3	-0.000197148	0.00387687	0.967654	-0.00779581	0.00740151	0.999803	0.992234	1.00743
lJCf7U	NVUC7S	Bladder cancer	AC244131.2_ENSG00000275119	Weighted median	3	0.000303252	0.00013926	0.0294363	3.0302e-05	0.000576201	1.0003	1.00003	1.00058
lJCf7U	NVUC7S	Bladder cancer	AC244131.2_ENSG00000275119	Inverse variance weighted	3	0.0003138	0.000120761	0.0093627	7.71083e-05	0.000550493	1.00031	1.00008	1.00055
lJCf7U	NVUC7S	Bladder cancer	AC244131.2_ENSG00000275119	Simple mode	3	0.000301553	0.000171083	0.220022	-3.37696e-05	0.000636876	1.0003	0.999966	1.00064
lJCf7U	NVUC7S	Bladder cancer	AC244131.2_ENSG00000275119	Weighted mode	3	0.000301422	0.000164272	0.20795	-2.055e-05	0.000623394	1.0003	0.999979	1.00062
LsQeeY	NVUC7S	Bladder cancer	INPP1_ENSG00000151689	Inverse variance weighted	2	-0.000181407	0.000173243	0.295042	-0.000520963	0.000158149	0.999819	0.999479	1.00016
LUEyZn	NVUC7S	Bladder cancer	GLIPR1L2_ENSG00000180481	MR Egger	4	0.000683075	0.000508796	0.311512	-0.000314165	0.00168032	1.00068	0.999686	1.00168
LUEyZn	NVUC7S	Bladder cancer	GLIPR1L2_ENSG00000180481	Weighted median	4	0.000194964	9.48165e-05	0.0397605	9.124e-06	0.000380805	1.00019	1.00001	1.00038
LUEyZn	NVUC7S	Bladder cancer	GLIPR1L2_ENSG00000180481	Inverse variance weighted	4	0.000160465	8.2557e-05	0.0519338	-1.34717e-06	0.000322276	1.00016	0.999999	1.00032
LUEyZn	NVUC7S	Bladder cancer	GLIPR1L2_ENSG00000180481	Simple mode	4	0.00019571	0.000124317	0.213491	-4.79513e-05	0.00043937	1.0002	0.999952	1.00044
LUEyZn	NVUC7S	Bladder cancer	GLIPR1L2_ENSG00000180481	Weighted mode	4	0.000199601	0.00011702	0.186609	-2.97591e-05	0.00042896	1.0002	0.99997	1.00043
lW8Fru	NVUC7S	Bladder cancer	THNSL2_ENSG00000144115	Wald ratio	1	-8.38342e-05	0.000283334	0.767318	-0.000639169	0.0004715	0.999916	0.999361	1.00047
lWOXav	NVUC7S	Bladder cancer	GALC_ENSG00000054983	Inverse variance weighted	2	-0.000398996	0.000248923	0.108959	-0.000886884	8.88928e-05	0.999601	0.999114	1.00009
LXwEs1	NVUC7S	Bladder cancer	MGMT_ENSG00000170430	Wald ratio	1	0.000266	0.000331133	0.4218	-0.000383021	0.000915022	1.00027	0.999617	1.00092
lyqGRT	NVUC7S	Bladder cancer	MIR4713HG_ENSG00000259240	MR Egger	3	0.000992855	0.0042098	0.852552	-0.00725835	0.00924406	1.00099	0.992768	1.00929
lyqGRT	NVUC7S	Bladder cancer	MIR4713HG_ENSG00000259240	Weighted median	3	0.000128534	0.00017459	0.461607	-0.000213663	0.00047073	1.00013	0.999786	1.00047
lyqGRT	NVUC7S	Bladder cancer	MIR4713HG_ENSG00000259240	Inverse variance weighted	3	0.000147212	0.000151937	0.332596	-0.000150585	0.000445009	1.00015	0.999849	1.00045
lyqGRT	NVUC7S	Bladder cancer	MIR4713HG_ENSG00000259240	Simple mode	3	0.000120431	0.000201976	0.611497	-0.000275442	0.000516303	1.00012	0.999725	1.00052
lyqGRT	NVUC7S	Bladder cancer	MIR4713HG_ENSG00000259240	Weighted mode	3	0.000120645	0.000200549	0.608565	-0.000272431	0.000513721	1.00012	0.999728	1.00051
M71jkw	NVUC7S	Bladder cancer	AL139352.1_ENSG00000132832	Wald ratio	1	-0.00021908	0.000280782	0.435244	-0.000769414	0.000331253	0.999781	0.999231	1.00033
mE1Idr	NVUC7S	Bladder cancer	QRSL1_ENSG00000130348	Wald ratio	1	-0.000462857	0.000339007	0.172149	-0.00112731	0.000201597	0.999537	0.998873	1.0002
miVzp0	NVUC7S	Bladder cancer	AC090124.1_ENSG00000254530	Inverse variance weighted	2	0.000194193	0.000142841	0.173986	-8.57747e-05	0.00047416	1.00019	0.999914	1.00047
mkbFo9	NVUC7S	Bladder cancer	MKNK1_ENSG00000079277	Wald ratio	1	-0.000399065	0.00041998	0.34201	-0.00122223	0.000424095	0.999601	0.998779	1.00042
mlA03F	NVUC7S	Bladder cancer	LINC01535_ENSG00000226686	MR Egger	5	0.000336559	0.00228641	0.89231	-0.00414481	0.00481793	1.00034	0.995864	1.00483
mlA03F	NVUC7S	Bladder cancer	LINC01535_ENSG00000226686	Weighted median	5	-4.15097e-05	0.00016824	0.805117	-0.00037126	0.00028824	0.999958	0.999629	1.00029
mlA03F	NVUC7S	Bladder cancer	LINC01535_ENSG00000226686	Inverse variance weighted	5	-2.47583e-05	0.00014366	0.86317	-0.000306331	0.000256814	0.999975	0.999694	1.00026
mlA03F	NVUC7S	Bladder cancer	LINC01535_ENSG00000226686	Simple mode	5	-4.37704e-05	0.000211196	0.845938	-0.000457715	0.000370174	0.999956	0.999542	1.00037
mlA03F	NVUC7S	Bladder cancer	LINC01535_ENSG00000226686	Weighted mode	5	-4.37704e-05	0.000224414	0.854866	-0.000483622	0.000396081	0.999956	0.999516	1.0004
Mlahdt	NVUC7S	Bladder cancer	TCEA3_ENSG00000204219	Wald ratio	1	-0.00013085	0.000239632	0.585035	-0.000600529	0.000338829	0.999869	0.9994	1.00034
moO7y9	NVUC7S	Bladder cancer	NPIPA5_ENSG00000183793	Wald ratio	1	-9.12767e-05	0.000227608	0.688401	-0.000537388	0.000354834	0.999909	0.999463	1.00035
Mp0pjA	NVUC7S	Bladder cancer	NAPG_ENSG00000134265	Wald ratio	1	-0.000717349	0.000424639	0.0911586	-0.00154964	0.000114942	0.999283	0.998452	1.00011
mRDdVQ	NVUC7S	Bladder cancer	TRMT9B_ENSG00000250305	Wald ratio	1	0.000749407	0.00039495	0.0577653	-2.46944e-05	0.00152351	1.00075	0.999975	1.00152
mtUSXQ	NVUC7S	Bladder cancer	MVB12B_ENSG00000196814	Wald ratio	1	-0.000376709	0.000366269	0.303713	-0.0010946	0.000341179	0.999623	0.998906	1.00034
MuIYiy	NVUC7S	Bladder cancer	LRRC37A_ENSG00000176681	Inverse variance weighted	2	0.000314155	0.000186945	0.0928664	-5.22572e-05	0.000680567	1.00031	0.999948	1.00068
N10e5C	NVUC7S	Bladder cancer	FAM153A_ENSG00000170074	Inverse variance weighted	2	0.00029546	0.000132588	0.0258538	3.55868e-05	0.000555333	1.0003	1.00004	1.00056
N4welu	NVUC7S	Bladder cancer	COL28A1_ENSG00000215018	Wald ratio	1	0.00065018	0.000335413	0.0525685	-7.22866e-06	0.00130759	1.00065	0.999993	1.00131
nF0akq	NVUC7S	Bladder cancer	DEAF1_ENSG00000177030	Wald ratio	1	0.000533789	0.000368094	0.147018	-0.000187674	0.00125525	1.00053	0.999812	1.00126
NM6Kje	NVUC7S	Bladder cancer	PPFIBP1_ENSG00000110841	Wald ratio	1	-0.000817744	0.000553126	0.1393	-0.00190187	0.000266383	0.999183	0.9981	1.00027
nMbDuT	NVUC7S	Bladder cancer	CCDC57_ENSG00000176155	Wald ratio	1	0.000177497	0.000536796	0.740901	-0.000874623	0.00122962	1.00018	0.999126	1.00123
noOkAS	NVUC7S	Bladder cancer	LINC02210-CRHR1_ENSG00000263715	MR Egger	6	0.00114403	0.00320688	0.739308	-0.00514146	0.00742952	1.00114	0.994872	1.00746
noOkAS	NVUC7S	Bladder cancer	LINC02210-CRHR1_ENSG00000263715	Weighted median	6	0.000139832	0.000172846	0.418518	-0.000198947	0.00047861	1.00014	0.999801	1.00048
noOkAS	NVUC7S	Bladder cancer	LINC02210-CRHR1_ENSG00000263715	Inverse variance weighted	6	0.000144456	0.000145479	0.320725	-0.000140683	0.000429596	1.00014	0.999859	1.00043
noOkAS	NVUC7S	Bladder cancer	LINC02210-CRHR1_ENSG00000263715	Simple mode	6	0.000133846	0.000236517	0.59591	-0.000329727	0.000597419	1.00013	0.99967	1.0006
noOkAS	NVUC7S	Bladder cancer	LINC02210-CRHR1_ENSG00000263715	Weighted mode	6	0.000130904	0.000239009	0.607453	-0.000337554	0.000599362	1.00013	0.999663	1.0006
NrCpIV	NVUC7S	Bladder cancer	MMP26_ENSG00000167346	Wald ratio	1	2.02269e-05	0.000189037	0.914789	-0.000350287	0.00039074	1.00002	0.99965	1.00039
nsHOmp	NVUC7S	Bladder cancer	PWP2_ENSG00000241945	Wald ratio	1	-1.59635e-05	0.000162364	0.921679	-0.000334196	0.000302269	0.999984	0.999666	1.0003
NsNhjH	NVUC7S	Bladder cancer	LINC01891_ENSG00000231682	Wald ratio	1	5.71051e-05	0.000320989	0.858799	-0.000572033	0.000686244	1.00006	0.999428	1.00069
Nw4LiD	NVUC7S	Bladder cancer	CHAF1A_ENSG00000167670	Wald ratio	1	-0.000187302	0.000259747	0.470851	-0.000696406	0.000321802	0.999813	0.999304	1.00032
nxDeKX	NVUC7S	Bladder cancer	FAM182B_ENSG00000175170	MR Egger	7	0.000213834	0.00081364	0.803182	-0.0013809	0.00180857	1.00021	0.99862	1.00181
nxDeKX	NVUC7S	Bladder cancer	FAM182B_ENSG00000175170	Weighted median	7	-4.36224e-05	7.71711e-05	0.571891	-0.000194878	0.000107633	0.999956	0.999805	1.00011
nxDeKX	NVUC7S	Bladder cancer	FAM182B_ENSG00000175170	Inverse variance weighted	7	-3.2071e-05	6.33419e-05	0.612636	-0.000156221	9.20792e-05	0.999968	0.999844	1.00009
nxDeKX	NVUC7S	Bladder cancer	FAM182B_ENSG00000175170	Simple mode	7	-6.73143e-05	9.53256e-05	0.506574	-0.000254153	0.000119524	0.999933	0.999746	1.00012
nxDeKX	NVUC7S	Bladder cancer	FAM182B_ENSG00000175170	Weighted mode	7	-5.80943e-05	0.000103562	0.595136	-0.000261076	0.000144887	0.999942	0.999739	1.00014
O7IH0j	NVUC7S	Bladder cancer	AC004053.1_ENSG00000248242	Wald ratio	1	-0.000215068	0.000390737	0.582035	-0.000980913	0.000550777	0.999785	0.99902	1.00055
oaNHMj	NVUC7S	Bladder cancer	TRPV2_ENSG00000187688	Wald ratio	1	0.000148708	0.000237339	0.530946	-0.000316477	0.000613893	1.00015	0.999684	1.00061
OGuTLx	NVUC7S	Bladder cancer	HLA-DMA_ENSG00000204257	MR Egger	4	0.000231199	0.00046204	0.666437	-0.000674399	0.0011368	1.00023	0.999326	1.00114
OGuTLx	NVUC7S	Bladder cancer	HLA-DMA_ENSG00000204257	Weighted median	4	0.000130809	0.000136974	0.339582	-0.00013766	0.000399278	1.00013	0.999862	1.0004
OGuTLx	NVUC7S	Bladder cancer	HLA-DMA_ENSG00000204257	Inverse variance weighted	4	0.000141641	0.000118951	0.23375	-9.15024e-05	0.000374785	1.00014	0.999909	1.00037
OGuTLx	NVUC7S	Bladder cancer	HLA-DMA_ENSG00000204257	Simple mode	4	0.000184198	0.000185354	0.393589	-0.000179096	0.000547491	1.00018	0.999821	1.00055
OGuTLx	NVUC7S	Bladder cancer	HLA-DMA_ENSG00000204257	Weighted mode	4	0.00010046	0.000170464	0.597077	-0.00023365	0.00043457	1.0001	0.999766	1.00043
OHbPml	NVUC7S	Bladder cancer	OR2L5_ENSG00000197454	Wald ratio	1	-5.28256e-05	0.000233298	0.820867	-0.000510089	0.000404438	0.999947	0.99949	1.0004
oHi2PZ	NVUC7S	Bladder cancer	MGRN1_ENSG00000102858	Wald ratio	1	8.13491e-05	0.000327267	0.803692	-0.000560093	0.000722792	1.00008	0.99944	1.00072
oLpa1W	NVUC7S	Bladder cancer	SMCO4_ENSG00000166002	Wald ratio	1	0.000135113	0.000349965	0.69944	-0.000550817	0.000821044	1.00014	0.999449	1.00082
OMiqof	NVUC7S	Bladder cancer	HSD17B4_ENSG00000133835	Wald ratio	1	0.000380947	0.000460015	0.407604	-0.000520684	0.00128258	1.00038	0.999479	1.00128
oq639z	NVUC7S	Bladder cancer	LINC00665_ENSG00000232677	Wald ratio	1	3.56677e-05	0.00032453	0.912484	-0.000600411	0.000671746	1.00004	0.9994	1.00067
OTWGEd	NVUC7S	Bladder cancer	TRIM69_ENSG00000185880	Wald ratio	1	0.000142004	0.000279192	0.611015	-0.000405212	0.000689221	1.00014	0.999595	1.00069
OuFeNr	NVUC7S	Bladder cancer	CWF19L1_ENSG00000095485	Wald ratio	1	0.000308807	0.000267558	0.24843	-0.000215606	0.000833221	1.00031	0.999784	1.00083
OYOZIU	NVUC7S	Bladder cancer	ALG1L_ENSG00000189366	Wald ratio	1	0.000137799	0.000282038	0.625136	-0.000414995	0.000690593	1.00014	0.999585	1.00069
oyqLEo	NVUC7S	Bladder cancer	WWOX_ENSG00000186153	Wald ratio	1	-2.46832e-05	0.000326959	0.939822	-0.000665523	0.000616157	0.999975	0.999335	1.00062
P830pt	NVUC7S	Bladder cancer	DNALI1_ENSG00000163879	Inverse variance weighted	2	-0.000215981	0.00021923	0.324536	-0.000645673	0.00021371	0.999784	0.999355	1.00021
pA31B5	NVUC7S	Bladder cancer	ECI2_ENSG00000198721	Wald ratio	1	-0.000138348	0.000293216	0.63705	-0.000713052	0.000436356	0.999862	0.999287	1.00044
PbWGC6	NVUC7S	Bladder cancer	PPM1K-DT_ENSG00000246375	Wald ratio	1	-7.23137e-05	0.000220508	0.742956	-0.00050451	0.000359882	0.999928	0.999496	1.00036
Pc8Tey	NVUC7S	Bladder cancer	KNSTRN_ENSG00000128944	Wald ratio	1	4.38683e-05	0.000220962	0.842628	-0.000389218	0.000476954	1.00004	0.999611	1.00048
PD7STz	NVUC7S	Bladder cancer	ZNF235_ENSG00000159917	Wald ratio	1	0.000200059	0.00036566	0.584298	-0.000516635	0.000916753	1.0002	0.999483	1.00092
pHlxDa	NVUC7S	Bladder cancer	ITGB3BP_ENSG00000142856	Wald ratio	1	-0.00010116	0.000175698	0.564776	-0.000445527	0.000243207	0.999899	0.999555	1.00024
pIXSqf	NVUC7S	Bladder cancer	RFC4_ENSG00000163918	Wald ratio	1	7.11575e-05	0.000330465	0.829514	-0.000576555	0.00071887	1.00007	0.999424	1.00072
Plpfe1	NVUC7S	Bladder cancer	TDRD5_ENSG00000162782	Inverse variance weighted	2	-0.000153242	0.000192504	0.426004	-0.00053055	0.000224066	0.999847	0.99947	1.00022
PSz0Al	NVUC7S	Bladder cancer	L2HGDH_ENSG00000087299	Wald ratio	1	3.26859e-05	0.000346658	0.92488	-0.000646763	0.000712135	1.00003	0.999353	1.00071
PvqTp4	NVUC7S	Bladder cancer	IL17RC_ENSG00000163702	Wald ratio	1	-0.00018451	0.000343615	0.59129	-0.000857995	0.000488975	0.999816	0.999142	1.00049
PVS7Fp	NVUC7S	Bladder cancer	CFAP410_ENSG00000160226	Wald ratio	1	-6.68297e-05	0.000376335	0.859053	-0.000804447	0.000670788	0.999933	0.999196	1.00067
Px5usy	NVUC7S	Bladder cancer	AL031599.1_ENSG00000224228	Wald ratio	1	0.000111551	0.000330571	0.735777	-0.000536367	0.000759469	1.00011	0.999464	1.00076
PzyT88	NVUC7S	Bladder cancer	PILRA_ENSG00000085514	Wald ratio	1	-0.000465058	0.000438565	0.288959	-0.00132465	0.00039453	0.999535	0.998676	1.00039
QcOp4R	NVUC7S	Bladder cancer	LDHAL6A_ENSG00000166800	Wald ratio	1	-0.000244233	0.000298408	0.413098	-0.000829112	0.000340646	0.999756	0.999171	1.00034
qGAOL1	NVUC7S	Bladder cancer	TAMM41_ENSG00000144559	Wald ratio	1	9.4984e-05	0.000332321	0.775016	-0.000556365	0.000746334	1.00009	0.999444	1.00075
qhB5U9	NVUC7S	Bladder cancer	ARSB_ENSG00000113273	Wald ratio	1	1.81257e-05	0.000381738	0.962129	-0.000730081	0.000766332	1.00002	0.99927	1.00077
QIOeE4	NVUC7S	Bladder cancer	AC008758.6_ENSG00000269755	Wald ratio	1	0.000174309	0.000296856	0.557081	-0.00040753	0.000756148	1.00017	0.999593	1.00076
QIPm5L	NVUC7S	Bladder cancer	MPPE1_ENSG00000154889	Wald ratio	1	-0.000305046	0.00027923	0.274635	-0.000852337	0.000242246	0.999695	0.999148	1.00024
qjplI4	NVUC7S	Bladder cancer	AL590705.1_ENSG00000203279	Wald ratio	1	-8.27617e-05	0.000216392	0.702119	-0.000506891	0.000341367	0.999917	0.999493	1.00034
QM7WVv	NVUC7S	Bladder cancer	C12orf60_ENSG00000182993	Wald ratio	1	0.000375893	0.000273203	0.168861	-0.000159585	0.000911372	1.00038	0.99984	1.00091
Qmjziz	NVUC7S	Bladder cancer	LHFPL2_ENSG00000145685	Wald ratio	1	0.000231651	0.000243689	0.341807	-0.00024598	0.000709282	1.00023	0.999754	1.00071
qn4s9e	NVUC7S	Bladder cancer	AC003005.2_ENSG00000268266	Wald ratio	1	0.000157083	0.000320776	0.624349	-0.000471638	0.000785803	1.00016	0.999528	1.00079
QNgSTq	NVUC7S	Bladder cancer	PARVA_ENSG00000197702	Wald ratio	1	-0.000120008	0.000265706	0.651517	-0.000640791	0.000400776	0.99988	0.999359	1.0004
qtLzNm	NVUC7S	Bladder cancer	ANO5_ENSG00000171714	Wald ratio	1	0.00114821	0.000621174	0.0645381	-6.92954e-05	0.00236571	1.00115	0.999931	1.00237
qtRv50	NVUC7S	Bladder cancer	NSUN2_ENSG00000037474	Wald ratio	1	6.19382e-05	0.00018481	0.737516	-0.00030029	0.000424167	1.00006	0.9997	1.00042
QukvOv	NVUC7S	Bladder cancer	TM2D3_ENSG00000184277	Wald ratio	1	-0.00025762	0.000708676	0.716214	-0.00164662	0.00113138	0.999742	0.998355	1.00113
QV5x3G	NVUC7S	Bladder cancer	ZNF589_ENSG00000164048	Inverse variance weighted	2	0.000262787	0.000258204	0.308798	-0.000243294	0.000768867	1.00026	0.999757	1.00077
rdkjBA	NVUC7S	Bladder cancer	AC110285.2_ENSG00000262877	Wald ratio	1	-0.000136151	0.000234147	0.560921	-0.00059508	0.000322778	0.999864	0.999405	1.00032
Rj80cw	NVUC7S	Bladder cancer	CYB561_ENSG00000008283	MR Egger	3	-5.71056e-05	0.00278993	0.986971	-0.00552537	0.00541116	0.999943	0.99449	1.00543
Rj80cw	NVUC7S	Bladder cancer	CYB561_ENSG00000008283	Weighted median	3	8.26752e-05	8.66446e-05	0.339988	-8.71481e-05	0.000252499	1.00008	0.999913	1.00025
Rj80cw	NVUC7S	Bladder cancer	CYB561_ENSG00000008283	Inverse variance weighted	3	7.54828e-05	7.50148e-05	0.314301	-7.15463e-05	0.000222512	1.00008	0.999928	1.00022
Rj80cw	NVUC7S	Bladder cancer	CYB561_ENSG00000008283	Simple mode	3	8.90703e-05	0.000100005	0.467088	-0.000106939	0.00028508	1.00009	0.999893	1.00029
Rj80cw	NVUC7S	Bladder cancer	CYB561_ENSG00000008283	Weighted mode	3	8.96282e-05	9.50903e-05	0.445402	-9.67488e-05	0.000276005	1.00009	0.999903	1.00028
rVQhjA	NVUC7S	Bladder cancer	CAMLG_ENSG00000164615	MR Egger	3	0.0013711	0.00558898	0.846847	-0.00958329	0.0123255	1.00137	0.990462	1.0124
rVQhjA	NVUC7S	Bladder cancer	CAMLG_ENSG00000164615	Weighted median	3	0.000153241	0.000292052	0.599788	-0.000419181	0.000725663	1.00015	0.999581	1.00073
rVQhjA	NVUC7S	Bladder cancer	CAMLG_ENSG00000164615	Inverse variance weighted	3	7.7968e-05	0.000256586	0.76123	-0.000424941	0.000580877	1.00008	0.999575	1.00058
rVQhjA	NVUC7S	Bladder cancer	CAMLG_ENSG00000164615	Simple mode	3	0.000177944	0.00036103	0.670896	-0.000529674	0.000885563	1.00018	0.99947	1.00089
rVQhjA	NVUC7S	Bladder cancer	CAMLG_ENSG00000164615	Weighted mode	3	0.000176893	0.000336386	0.651474	-0.000482424	0.000836209	1.00018	0.999518	1.00084
RZ0Xjz	NVUC7S	Bladder cancer	MICU1_ENSG00000107745	Wald ratio	1	-0.000264948	0.000391469	0.49853	-0.00103223	0.000502331	0.999735	0.998968	1.0005
s16K7R	NVUC7S	Bladder cancer	GSAP_ENSG00000186088	Wald ratio	1	0.000390571	0.000324946	0.229382	-0.000246325	0.00102747	1.00039	0.999754	1.00103
s47MmS	NVUC7S	Bladder cancer	C3orf20_ENSG00000131379	Wald ratio	1	-9.4132e-05	0.000191063	0.622242	-0.000468616	0.000280352	0.999906	0.999531	1.00028
S4BMth	NVUC7S	Bladder cancer	AC159540.2_ENSG00000277701	Inverse variance weighted	2	-0.000568434	0.000315047	0.0711868	-0.00118593	4.90579e-05	0.999432	0.998815	1.00005
sKMlLs	NVUC7S	Bladder cancer	C2orf80_ENSG00000188674	Wald ratio	1	-0.000224573	0.000449816	0.6176	-0.00110621	0.000657067	0.999775	0.998894	1.00066
sKtzID	NVUC7S	Bladder cancer	DNAH7_ENSG00000118997	Wald ratio	1	0.000479651	0.000323698	0.138398	-0.000154798	0.0011141	1.00048	0.999845	1.00111
slxDZ5	NVUC7S	Bladder cancer	VPS53_ENSG00000141252	Wald ratio	1	2.04346e-05	0.0005424	0.969947	-0.00104267	0.00108354	1.00002	0.998958	1.00108
snp9W2	NVUC7S	Bladder cancer	DHFR2_ENSG00000178700	Wald ratio	1	0.000364989	0.000300092	0.223886	-0.00022319	0.000953169	1.00037	0.999777	1.00095
SPrp1O	NVUC7S	Bladder cancer	IFT88_ENSG00000032742	Inverse variance weighted	2	0.000280755	0.000186284	0.131778	-8.43628e-05	0.000645872	1.00028	0.999916	1.00065
SRFTfo	NVUC7S	Bladder cancer	ARHGAP42_ENSG00000165895	Wald ratio	1	9.58273e-05	0.000258838	0.711218	-0.000411495	0.00060315	1.0001	0.999589	1.0006
SssSOK	NVUC7S	Bladder cancer	MXRA7_ENSG00000182534	Wald ratio	1	-0.000261834	0.000513898	0.610398	-0.00126907	0.000745406	0.999738	0.998732	1.00075
SwoA1L	NVUC7S	Bladder cancer	TRAF3_ENSG00000131323	Wald ratio	1	-0.000344633	0.000376426	0.359908	-0.00108243	0.000393162	0.999655	0.998918	1.00039
sydFje	NVUC7S	Bladder cancer	MTERF4_ENSG00000122085	Wald ratio	1	0.000367905	0.000415493	0.375905	-0.000446461	0.00118227	1.00037	0.999554	1.00118
t95iM4	NVUC7S	Bladder cancer	EFCAB5_ENSG00000176927	Wald ratio	1	-0.000101155	0.000349029	0.771955	-0.000785252	0.000582941	0.999899	0.999215	1.00058
TaK38N	NVUC7S	Bladder cancer	AL591441.1_ENSG00000276128	Wald ratio	1	0.000324502	0.000218449	0.137416	-0.000103658	0.000752663	1.00032	0.999896	1.00075
TBK5ZO	NVUC7S	Bladder cancer	FAM66A_ENSG00000227888	Wald ratio	1	0.000129679	0.000253987	0.609649	-0.000368135	0.000627494	1.00013	0.999632	1.00063
tEvwM4	NVUC7S	Bladder cancer	XKR9_ENSG00000221947	MR Egger	6	-0.000217877	0.00133383	0.878166	-0.00283219	0.00239643	0.999782	0.997172	1.0024
tEvwM4	NVUC7S	Bladder cancer	XKR9_ENSG00000221947	Weighted median	6	-0.000228917	9.40168e-05	0.0148978	-0.00041319	-4.46442e-05	0.999771	0.999587	0.999955
tEvwM4	NVUC7S	Bladder cancer	XKR9_ENSG00000221947	Inverse variance weighted	6	-0.00022706	7.92319e-05	0.00416004	-0.000382354	-7.17654e-05	0.999773	0.999618	0.999928
tEvwM4	NVUC7S	Bladder cancer	XKR9_ENSG00000221947	Simple mode	6	-0.000243002	0.000130633	0.121942	-0.000499042	1.3039e-05	0.999757	0.999501	1.00001
tEvwM4	NVUC7S	Bladder cancer	XKR9_ENSG00000221947	Weighted mode	6	-0.000238477	0.000125033	0.11478	-0.000483541	6.58687e-06	0.999762	0.999517	1.00001
tHjkQb	NVUC7S	Bladder cancer	APIP_ENSG00000149089	Inverse variance weighted	2	-0.000266273	0.000144185	0.0647838	-0.000548875	1.63294e-05	0.999734	0.999451	1.00002
tIzvJX	NVUC7S	Bladder cancer	ANKRD36B_ENSG00000196912	MR Egger	8	-0.000382836	0.000695325	0.601799	-0.00174567	0.000980001	0.999617	0.998256	1.00098
tIzvJX	NVUC7S	Bladder cancer	ANKRD36B_ENSG00000196912	Weighted median	8	-0.000308976	0.00010566	0.00345282	-0.000516069	-0.000101883	0.999691	0.999484	0.999898
tIzvJX	NVUC7S	Bladder cancer	ANKRD36B_ENSG00000196912	Inverse variance weighted	8	-0.00031168	8.37722e-05	0.000198774	-0.000475874	-0.000147487	0.999688	0.999524	0.999853
tIzvJX	NVUC7S	Bladder cancer	ANKRD36B_ENSG00000196912	Simple mode	8	-0.000287868	0.000153649	0.10314	-0.000589021	1.32848e-05	0.999712	0.999411	1.00001
tIzvJX	NVUC7S	Bladder cancer	ANKRD36B_ENSG00000196912	Weighted mode	8	-0.000290135	0.000148455	0.0915776	-0.000581108	8.37455e-07	0.99971	0.999419	1
TmrQ9r	NVUC7S	Bladder cancer	THEM4_ENSG00000159445	Wald ratio	1	-8.13341e-05	0.000427758	0.849199	-0.000919739	0.000757071	0.999919	0.999081	1.00076
Tp2HNG	NVUC7S	Bladder cancer	PCM1_ENSG00000078674	Inverse variance weighted	2	0.000218865	0.000137226	0.110728	-5.00973e-05	0.000487828	1.00022	0.99995	1.00049
TqQqAP	NVUC7S	Bladder cancer	AC096887.1_ENSG00000272305	Inverse variance weighted	2	5.65001e-05	0.000214111	0.79187	-0.000363157	0.000476157	1.00006	0.999637	1.00048
Tvj4LQ	NVUC7S	Bladder cancer	AC008467.1_ENSG00000249476	Wald ratio	1	0.000400215	0.000257096	0.119548	-0.000103693	0.000904122	1.0004	0.999896	1.0009
u1bAiO	NVUC7S	Bladder cancer	AC011462.2_ENSG00000255730	Wald ratio	1	-0.000138554	0.000296774	0.640596	-0.000720232	0.000443124	0.999861	0.99928	1.00044
U7BiRU	NVUC7S	Bladder cancer	SESTD1_ENSG00000187231	Wald ratio	1	-0.000301298	0.000405055	0.456971	-0.0010952	0.00049261	0.999699	0.998905	1.00049
U7iDxh	NVUC7S	Bladder cancer	FKRP_ENSG00000181027	Wald ratio	1	-0.000445624	0.000381642	0.242949	-0.00119364	0.000302395	0.999554	0.998807	1.0003
UaHBZu	NVUC7S	Bladder cancer	ANKDD1A_ENSG00000166839	Wald ratio	1	0.000171071	0.000312048	0.583539	-0.000440542	0.000782685	1.00017	0.99956	1.00078
UaYBmm	NVUC7S	Bladder cancer	AP000350.6_ENSG00000273295	Wald ratio	1	0.000194849	0.000164659	0.236671	-0.000127882	0.00051758	1.00019	0.999872	1.00052
UcIYmj	NVUC7S	Bladder cancer	AL512625.3_ENSG00000234665	Wald ratio	1	-7.33482e-05	0.000403553	0.855774	-0.000864312	0.000717615	0.999927	0.999136	1.00072
ud9bZj	NVUC7S	Bladder cancer	HBS1L_ENSG00000112339	Inverse variance weighted	2	-6.52435e-05	0.000279389	0.815356	-0.000612845	0.000482358	0.999935	0.999387	1.00048
UfWT5p	NVUC7S	Bladder cancer	CABCOCO1_ENSG00000183346	Wald ratio	1	-0.000125998	0.0001982	0.524965	-0.000514469	0.000262473	0.999874	0.999486	1.00026
UjoaJl	NVUC7S	Bladder cancer	HFM1_ENSG00000162669	Wald ratio	1	0.000602443	0.000334894	0.0720336	-5.39496e-05	0.00125884	1.0006	0.999946	1.00126
UMwjuX	NVUC7S	Bladder cancer	MFAP3_ENSG00000037749	Inverse variance weighted	2	-0.000315523	0.000221717	0.15471	-0.000750089	0.000119042	0.999685	0.99925	1.00012
UUdAyf	NVUC7S	Bladder cancer	LPIN1_ENSG00000134324	Wald ratio	1	-0.000591037	0.000366527	0.106846	-0.00130943	0.000127355	0.999409	0.998691	1.00013
UwRsuw	NVUC7S	Bladder cancer	ALDH8A1_ENSG00000118514	Inverse variance weighted	2	4.39828e-06	0.000189585	0.981491	-0.000367188	0.000375985	1	0.999633	1.00038
v0sjj4	NVUC7S	Bladder cancer	AC023790.2_ENSG00000255621	Wald ratio	1	0.000402395	0.000321478	0.210678	-0.000227701	0.00103249	1.0004	0.999772	1.00103
v1GDhP	NVUC7S	Bladder cancer	ASAP3_ENSG00000088280	Wald ratio	1	-0.000272741	0.000287026	0.341996	-0.000835312	0.000289831	0.999727	0.999165	1.00029
V3DA1r	NVUC7S	Bladder cancer	WDR97_ENSG00000179698	Inverse variance weighted	2	-0.000125245	0.000171256	0.464576	-0.000460908	0.000210417	0.999875	0.999539	1.00021
v6vDlf	NVUC7S	Bladder cancer	PTPN12_ENSG00000127947	MR Egger	3	-0.00173593	0.00308422	0.673638	-0.00778101	0.00430915	0.998266	0.992249	1.00432
v6vDlf	NVUC7S	Bladder cancer	PTPN12_ENSG00000127947	Weighted median	3	-3.33392e-05	0.000161065	0.836016	-0.000349026	0.000282348	0.999967	0.999651	1.00028
v6vDlf	NVUC7S	Bladder cancer	PTPN12_ENSG00000127947	Inverse variance weighted	3	-4.5756e-05	0.000137951	0.740128	-0.00031614	0.000224628	0.999954	0.999684	1.00022
v6vDlf	NVUC7S	Bladder cancer	PTPN12_ENSG00000127947	Simple mode	3	2.01651e-06	0.000191396	0.99255	-0.00037312	0.000377153	1	0.999627	1.00038
v6vDlf	NVUC7S	Bladder cancer	PTPN12_ENSG00000127947	Weighted mode	3	-7.52129e-06	0.000186281	0.971461	-0.000372631	0.000357589	0.999992	0.999627	1.00036
VF8p0p	NVUC7S	Bladder cancer	SRR_ENSG00000167720	Inverse variance weighted	2	0.00020718	0.000236709	0.381437	-0.00025677	0.00067113	1.00021	0.999743	1.00067
vFija8	NVUC7S	Bladder cancer	MAP1LC3A_ENSG00000101460	MR Egger	4	0.00200399	0.0121606	0.884256	-0.0218307	0.0258387	1.00201	0.978406	1.02618
vFija8	NVUC7S	Bladder cancer	MAP1LC3A_ENSG00000101460	Weighted median	4	-0.000639778	0.000411699	0.120186	-0.00144671	0.000167153	0.99936	0.998554	1.00017
vFija8	NVUC7S	Bladder cancer	MAP1LC3A_ENSG00000101460	Inverse variance weighted	4	-0.000511654	0.000351804	0.145843	-0.00120119	0.000177882	0.999488	0.9988	1.00018
vFija8	NVUC7S	Bladder cancer	MAP1LC3A_ENSG00000101460	Simple mode	4	-0.000806554	0.00061027	0.278038	-0.00200268	0.000389576	0.999194	0.997999	1.00039
vFija8	NVUC7S	Bladder cancer	MAP1LC3A_ENSG00000101460	Weighted mode	4	-0.00081642	0.000611418	0.274058	-0.0020148	0.000381959	0.999184	0.997987	1.00038
VgqmYH	NVUC7S	Bladder cancer	AC006504.5_ENSG00000267575	MR Egger	5	-0.000654532	0.00125277	0.637472	-0.00310996	0.00180089	0.999346	0.996895	1.0018
VgqmYH	NVUC7S	Bladder cancer	AC006504.5_ENSG00000267575	Weighted median	5	-0.000217028	0.000109712	0.0479112	-0.000432064	-1.99186e-06	0.999783	0.999568	0.999998
VgqmYH	NVUC7S	Bladder cancer	AC006504.5_ENSG00000267575	Inverse variance weighted	5	-0.000208887	9.52576e-05	0.0283171	-0.000395592	-2.21822e-05	0.999791	0.999604	0.999978
VgqmYH	NVUC7S	Bladder cancer	AC006504.5_ENSG00000267575	Simple mode	5	-0.000226765	0.000144669	0.192073	-0.000510316	5.67858e-05	0.999773	0.99949	1.00006
VgqmYH	NVUC7S	Bladder cancer	AC006504.5_ENSG00000267575	Weighted mode	5	-0.000226765	0.000134099	0.166092	-0.000489599	3.60684e-05	0.999773	0.999511	1.00004
VPkf25	NVUC7S	Bladder cancer	COG1_ENSG00000166685	Wald ratio	1	0.00044721	0.000461988	0.333038	-0.000458287	0.00135271	1.00045	0.999542	1.00135
VUtuS7	NVUC7S	Bladder cancer	GAA_ENSG00000171298	Wald ratio	1	0.000256213	0.000297403	0.388963	-0.000326698	0.000839123	1.00026	0.999673	1.00084
vYYJ1z	NVUC7S	Bladder cancer	AC021752.1_ENSG00000273674	Wald ratio	1	-0.00019176	0.000360809	0.595092	-0.000898946	0.000515427	0.999808	0.999101	1.00052
Vz50ap	NVUC7S	Bladder cancer	SUSD1_ENSG00000106868	Inverse variance weighted	2	0.000155678	0.00031555	0.621763	-0.000462801	0.000774156	1.00016	0.999537	1.00077
vzknmz	NVUC7S	Bladder cancer	AC005697.1_ENSG00000266202	Wald ratio	1	0.000285299	0.000391593	0.466271	-0.000482223	0.00105282	1.00029	0.999518	1.00105
VzTLCp	NVUC7S	Bladder cancer	TMEM50B_ENSG00000142188	Wald ratio	1	0.00013639	0.000375279	0.716278	-0.000599157	0.000871938	1.00014	0.999401	1.00087
VZuAfw	NVUC7S	Bladder cancer	KCNT1_ENSG00000107147	Wald ratio	1	-0.000138761	0.000379632	0.714729	-0.00088284	0.000605319	0.999861	0.999118	1.00061
w2R77A	NVUC7S	Bladder cancer	SCFD1_ENSG00000092108	Inverse variance weighted	2	4.7589e-05	0.000262651	0.856221	-0.000467206	0.000562384	1.00005	0.999533	1.00056
w3Jv7H	NVUC7S	Bladder cancer	GSTO2_ENSG00000065621	Wald ratio	1	-9.29015e-05	0.000191496	0.627581	-0.000468234	0.000282431	0.999907	0.999532	1.00028
W51y10	NVUC7S	Bladder cancer	TSGA10_ENSG00000135951	Inverse variance weighted	2	-3.07943e-05	0.000209434	0.883103	-0.000441285	0.000379696	0.999969	0.999559	1.00038
W9R19g	NVUC7S	Bladder cancer	ZNF738_ENSG00000172687	Inverse variance weighted	2	-0.000259111	0.000248998	0.298054	-0.000747147	0.000228924	0.999741	0.999253	1.00023
WEWxaj	NVUC7S	Bladder cancer	LINC01876_ENSG00000226383	Wald ratio	1	0.000350883	0.000267704	0.189954	-0.000173816	0.000875582	1.00035	0.999826	1.00088
WfFoxu	NVUC7S	Bladder cancer	CEP128_ENSG00000100629	Inverse variance weighted	2	-6.12753e-05	0.000246357	0.803573	-0.000544134	0.000421584	0.999939	0.999456	1.00042
WKmgpZ	NVUC7S	Bladder cancer	POLE2_ENSG00000100479	Inverse variance weighted	2	-0.00041477	0.000298866	0.165194	-0.00100055	0.000171007	0.999585	0.999	1.00017
WkTlZN	NVUC7S	Bladder cancer	SERINC5_ENSG00000164300	Wald ratio	1	-4.7808e-05	0.000513379	0.925805	-0.00105403	0.000958416	0.999952	0.998947	1.00096
wlCsbL	NVUC7S	Bladder cancer	LINC02018_ENSG00000272690	Wald ratio	1	5.17998e-05	0.000330927	0.875616	-0.000596817	0.000700416	1.00005	0.999403	1.0007
wNATab	NVUC7S	Bladder cancer	KANSL1_ENSG00000120071	MR Egger	8	-0.000387174	0.000810773	0.649878	-0.00197629	0.00120194	0.999613	0.998026	1.0012
wNATab	NVUC7S	Bladder cancer	KANSL1_ENSG00000120071	Weighted median	8	6.53418e-05	5.99695e-05	0.275896	-5.21984e-05	0.000182882	1.00007	0.999948	1.00018
wNATab	NVUC7S	Bladder cancer	KANSL1_ENSG00000120071	Inverse variance weighted	8	7.19213e-05	4.93123e-05	0.144706	-2.47308e-05	0.000168573	1.00007	0.999975	1.00017
wNATab	NVUC7S	Bladder cancer	KANSL1_ENSG00000120071	Simple mode	8	6.46362e-05	8.12977e-05	0.452691	-9.47073e-05	0.00022398	1.00006	0.999905	1.00022
wNATab	NVUC7S	Bladder cancer	KANSL1_ENSG00000120071	Weighted mode	8	6.46362e-05	8.02913e-05	0.447284	-9.27348e-05	0.000222007	1.00006	0.999907	1.00022
WpCjJK	NVUC7S	Bladder cancer	PDE5A_ENSG00000138735	Wald ratio	1	0.000474301	0.000713575	0.506254	-0.000924307	0.00187291	1.00047	0.999076	1.00187
WQbCq7	NVUC7S	Bladder cancer	AP000345.2_ENSG00000272733	Wald ratio	1	-0.000243066	0.000283773	0.391693	-0.000799261	0.000313129	0.999757	0.999201	1.00031
WvroaV	NVUC7S	Bladder cancer	LMO7_ENSG00000136153	Wald ratio	1	-6.59674e-05	0.000387573	0.864848	-0.000825611	0.000693677	0.999934	0.999175	1.00069
wVW5CU	NVUC7S	Bladder cancer	AC009495.1_ENSG00000229195	Wald ratio	1	-3.08448e-05	0.000241187	0.898238	-0.000503572	0.000441882	0.999969	0.999497	1.00044
Wx0oVC	NVUC7S	Bladder cancer	NLRP2_ENSG00000022556	Wald ratio	1	5.07317e-05	0.000271562	0.851806	-0.00048153	0.000582993	1.00005	0.999519	1.00058
X0Mhhr	NVUC7S	Bladder cancer	RNF103-CHMP3_ENSG00000249884	Wald ratio	1	-0.000332896	0.000295064	0.259228	-0.000911222	0.00024543	0.999667	0.999089	1.00025
x1PcHA	NVUC7S	Bladder cancer	LINC01252_ENSG00000247157	MR Egger	3	-0.000502561	0.00328188	0.903265	-0.00693505	0.00592993	0.999498	0.993089	1.00595
x1PcHA	NVUC7S	Bladder cancer	LINC01252_ENSG00000247157	Weighted median	3	0.000369593	0.000176867	0.0366476	2.29341e-05	0.000716252	1.00037	1.00002	1.00072
x1PcHA	NVUC7S	Bladder cancer	LINC01252_ENSG00000247157	Inverse variance weighted	3	0.000367887	0.000146913	0.012276	7.99369e-05	0.000655838	1.00037	1.00008	1.00066
x1PcHA	NVUC7S	Bladder cancer	LINC01252_ENSG00000247157	Simple mode	3	0.000385142	0.000194377	0.186055	4.16388e-06	0.00076612	1.00039	1	1.00077
x1PcHA	NVUC7S	Bladder cancer	LINC01252_ENSG00000247157	Weighted mode	3	0.000376724	0.000206025	0.208977	-2.70847e-05	0.000780532	1.00038	0.999973	1.00078
X2PEYB	NVUC7S	Bladder cancer	ETFDH_ENSG00000171503	MR Egger	3	-0.000340805	0.00185228	0.884162	-0.00397127	0.00328966	0.999659	0.996037	1.0033
X2PEYB	NVUC7S	Bladder cancer	ETFDH_ENSG00000171503	Weighted median	3	0.000366293	0.000276785	0.185707	-0.000176205	0.000908791	1.00037	0.999824	1.00091
X2PEYB	NVUC7S	Bladder cancer	ETFDH_ENSG00000171503	Inverse variance weighted	3	0.000408129	0.000245592	0.0965497	-7.32317e-05	0.000889489	1.00041	0.999927	1.00089
X2PEYB	NVUC7S	Bladder cancer	ETFDH_ENSG00000171503	Simple mode	3	0.000350087	0.00031393	0.380803	-0.000265215	0.000965389	1.00035	0.999735	1.00097
X2PEYB	NVUC7S	Bladder cancer	ETFDH_ENSG00000171503	Weighted mode	3	0.000350087	0.000328352	0.398002	-0.000293483	0.000993657	1.00035	0.999707	1.00099
X8G6GE	NVUC7S	Bladder cancer	MUC20-OT1_ENSG00000242086	Wald ratio	1	-0.000224723	0.000246368	0.361693	-0.000707605	0.000258159	0.999775	0.999293	1.00026
XCgMb1	NVUC7S	Bladder cancer	ATG10_ENSG00000152348	MR Egger	3	-0.00234367	0.00862626	0.831114	-0.0192511	0.0145638	0.997659	0.980933	1.01467
XCgMb1	NVUC7S	Bladder cancer	ATG10_ENSG00000152348	Weighted median	3	-1.06209e-05	0.000118947	0.928851	-0.000243757	0.000222516	0.999989	0.999756	1.00022
XCgMb1	NVUC7S	Bladder cancer	ATG10_ENSG00000152348	Inverse variance weighted	3	1.17746e-05	9.78578e-05	0.904227	-0.000180027	0.000203576	1.00001	0.99982	1.0002
XCgMb1	NVUC7S	Bladder cancer	ATG10_ENSG00000152348	Simple mode	3	-1.38662e-05	0.000128474	0.923903	-0.000265675	0.000237942	0.999986	0.999734	1.00024
XCgMb1	NVUC7S	Bladder cancer	ATG10_ENSG00000152348	Weighted mode	3	-1.41279e-05	0.000129195	0.922905	-0.00026735	0.000239094	0.999986	0.999733	1.00024
xdKq7d	NVUC7S	Bladder cancer	OR2M4_ENSG00000171180	Wald ratio	1	-0.00021792	0.000258237	0.398739	-0.000724064	0.000288224	0.999782	0.999276	1.00029
xLGuNl	NVUC7S	Bladder cancer	MYO6_ENSG00000196586	MR Egger	4	0.00136546	0.00330648	0.719695	-0.00511523	0.00784616	1.00137	0.994898	1.00788
xLGuNl	NVUC7S	Bladder cancer	MYO6_ENSG00000196586	Weighted median	4	-0.000591069	0.000230931	0.010482	-0.00104369	-0.000138445	0.999409	0.998957	0.999862
xLGuNl	NVUC7S	Bladder cancer	MYO6_ENSG00000196586	Inverse variance weighted	4	-0.000599145	0.000195935	0.00222913	-0.000983178	-0.000215112	0.999401	0.999017	0.999785
xLGuNl	NVUC7S	Bladder cancer	MYO6_ENSG00000196586	Simple mode	4	-0.000699157	0.000301747	0.103364	-0.00129058	-0.000107733	0.999301	0.99871	0.999892
xLGuNl	NVUC7S	Bladder cancer	MYO6_ENSG00000196586	Weighted mode	4	-0.000516872	0.000294059	0.177043	-0.00109323	5.94842e-05	0.999483	0.998907	1.00006
XmkGC0	NVUC7S	Bladder cancer	LEKR1_ENSG00000197980	Inverse variance weighted	2	-2.82839e-05	0.000173686	0.87064	-0.000368708	0.00031214	0.999972	0.999631	1.00031
XsUdO7	NVUC7S	Bladder cancer	LINC01340_ENSG00000250331	Wald ratio	1	0.000104327	0.000253218	0.680335	-0.00039198	0.000600634	1.0001	0.999608	1.0006
Xt3hLo	NVUC7S	Bladder cancer	PRSS55_ENSG00000184647	Wald ratio	1	0.000353694	0.000222505	0.111925	-8.24164e-05	0.000789805	1.00035	0.999918	1.00079
xtH29u	NVUC7S	Bladder cancer	PPIL3_ENSG00000240344	Wald ratio	1	0.000769215	0.000491176	0.117333	-0.00019349	0.00173192	1.00077	0.999807	1.00173
xxLFFv	NVUC7S	Bladder cancer	NARS2_ENSG00000137513	Wald ratio	1	0.000182711	0.000315897	0.563002	-0.000436446	0.000801868	1.00018	0.999564	1.0008
y0sq7Q	NVUC7S	Bladder cancer	C1GALT1_ENSG00000106392	Wald ratio	1	-9.96368e-05	0.000349667	0.775684	-0.000784983	0.00058571	0.9999	0.999215	1.00059
y4VfSI	NVUC7S	Bladder cancer	RAD51C_ENSG00000108384	MR Egger	6	-0.000195014	0.00385103	0.962041	-0.00774303	0.00735301	0.999805	0.992287	1.00738
y4VfSI	NVUC7S	Bladder cancer	RAD51C_ENSG00000108384	Weighted median	6	2.8752e-05	0.000155748	0.853538	-0.000276514	0.000334019	1.00003	0.999724	1.00033
y4VfSI	NVUC7S	Bladder cancer	RAD51C_ENSG00000108384	Inverse variance weighted	6	2.55346e-05	0.000136164	0.851247	-0.000241347	0.000292417	1.00003	0.999759	1.00029
y4VfSI	NVUC7S	Bladder cancer	RAD51C_ENSG00000108384	Simple mode	6	2.851e-05	0.000225089	0.904144	-0.000412664	0.000469684	1.00003	0.999587	1.00047
y4VfSI	NVUC7S	Bladder cancer	RAD51C_ENSG00000108384	Weighted mode	6	2.88195e-05	0.000226719	0.903803	-0.000415549	0.000473188	1.00003	0.999585	1.00047
Ya1V67	NVUC7S	Bladder cancer	EBPL_ENSG00000123179	Wald ratio	1	9.67199e-05	0.000268371	0.718551	-0.000429287	0.000622727	1.0001	0.999571	1.00062
YAvins	NVUC7S	Bladder cancer	AHI1_ENSG00000135541	Wald ratio	1	0.000183207	0.000378682	0.628528	-0.000559011	0.000925424	1.00018	0.999441	1.00093
yb4PVE	NVUC7S	Bladder cancer	ARL17A_ENSG00000185829	Wald ratio	1	0.000118624	0.000302938	0.69537	-0.000475134	0.000712382	1.00012	0.999525	1.00071
YeFVkl	NVUC7S	Bladder cancer	CCDC82_ENSG00000149231	Wald ratio	1	-0.000307657	0.000191465	0.108086	-0.000682929	6.76148e-05	0.999692	0.999317	1.00007
YfFBot	NVUC7S	Bladder cancer	AC093423.3_ENSG00000271949	Wald ratio	1	-0.000291013	0.000335409	0.385594	-0.000948414	0.000366389	0.999709	0.999052	1.00037
yHdXz2	NVUC7S	Bladder cancer	ZNF732_ENSG00000186777	Inverse variance weighted	2	-5.60891e-05	0.000196365	0.775156	-0.000440964	0.000328786	0.999944	0.999559	1.00033
yitKA4	NVUC7S	Bladder cancer	C1QTNF3-AMACR_ENSG00000273294	Wald ratio	1	-0.000495102	0.000425072	0.244121	-0.00132824	0.000338039	0.999505	0.998673	1.00034
ymcvHy	NVUC7S	Bladder cancer	TXNDC15_ENSG00000113621	MR Egger	3	0.000580117	0.00133257	0.738608	-0.00203172	0.00319195	1.00058	0.99797	1.0032
ymcvHy	NVUC7S	Bladder cancer	TXNDC15_ENSG00000113621	Weighted median	3	3.52188e-05	0.000141645	0.803638	-0.000242406	0.000312843	1.00004	0.999758	1.00031
ymcvHy	NVUC7S	Bladder cancer	TXNDC15_ENSG00000113621	Inverse variance weighted	3	4.3497e-05	0.000127473	0.732934	-0.00020635	0.000293344	1.00004	0.999794	1.00029
ymcvHy	NVUC7S	Bladder cancer	TXNDC15_ENSG00000113621	Simple mode	3	-4.40536e-06	0.000182406	0.982925	-0.000361922	0.000353111	0.999996	0.999638	1.00035
ymcvHy	NVUC7S	Bladder cancer	TXNDC15_ENSG00000113621	Weighted mode	3	-3.17989e-06	0.000161827	0.986107	-0.000320361	0.000314001	0.999997	0.99968	1.00031
yOmOHE	NVUC7S	Bladder cancer	GLB1_ENSG00000170266	Wald ratio	1	-0.000442321	0.000295938	0.135009	-0.00102236	0.000137718	0.999558	0.998978	1.00014
yop4Is	NVUC7S	Bladder cancer	PRPSAP1_ENSG00000161542	Wald ratio	1	0.000530785	0.000325446	0.102901	-0.000107088	0.00116866	1.00053	0.999893	1.00117
yP6aF7	NVUC7S	Bladder cancer	FLOT1_ENSG00000137312	MR Egger	12	-0.00233046	0.00308617	0.467584	-0.00837935	0.00371844	0.997672	0.991656	1.00373
yP6aF7	NVUC7S	Bladder cancer	FLOT1_ENSG00000137312	Weighted median	12	-0.000284023	0.000182816	0.12028	-0.000642342	7.42967e-05	0.999716	0.999358	1.00007
yP6aF7	NVUC7S	Bladder cancer	FLOT1_ENSG00000137312	Inverse variance weighted	12	-0.00019177	0.000145895	0.188699	-0.000477725	9.41846e-05	0.999808	0.999522	1.00009
yP6aF7	NVUC7S	Bladder cancer	FLOT1_ENSG00000137312	Simple mode	12	-0.000326779	0.000275614	0.260745	-0.000866983	0.000213424	0.999673	0.999133	1.00021
yP6aF7	NVUC7S	Bladder cancer	FLOT1_ENSG00000137312	Weighted mode	12	-0.000326779	0.00027247	0.255599	-0.00086082	0.000207262	0.999673	0.99914	1.00021
YtZrrJ	NVUC7S	Bladder cancer	PTPN13_ENSG00000163629	MR Egger	4	-0.0016891	0.00911443	0.870069	-0.0195534	0.0161752	0.998312	0.980637	1.01631
YtZrrJ	NVUC7S	Bladder cancer	PTPN13_ENSG00000163629	Weighted median	4	-0.000199266	0.000261459	0.445983	-0.000711726	0.000313195	0.999801	0.999289	1.00031
YtZrrJ	NVUC7S	Bladder cancer	PTPN13_ENSG00000163629	Inverse variance weighted	4	-0.000192952	0.0002432	0.427553	-0.000669624	0.000283721	0.999807	0.999331	1.00028
YtZrrJ	NVUC7S	Bladder cancer	PTPN13_ENSG00000163629	Simple mode	4	-0.000209665	0.000349518	0.590878	-0.00089472	0.00047539	0.99979	0.999106	1.00048
YtZrrJ	NVUC7S	Bladder cancer	PTPN13_ENSG00000163629	Weighted mode	4	-0.000209665	0.000352935	0.594289	-0.000901417	0.000482087	0.99979	0.999099	1.00048
YyPVT8	NVUC7S	Bladder cancer	CBWD2_ENSG00000136682	Wald ratio	1	-0.000120853	0.000327122	0.711796	-0.000762013	0.000520306	0.999879	0.999238	1.00052
zaZdv0	NVUC7S	Bladder cancer	FRG1-DT_ENSG00000245685	Wald ratio	1	-0.000105366	0.000355405	0.766873	-0.000801959	0.000591227	0.999895	0.999198	1.00059
zEpoMr	NVUC7S	Bladder cancer	RCVRN_ENSG00000109047	Wald ratio	1	6.98968e-05	0.000242905	0.773535	-0.000406197	0.00054599	1.00007	0.999594	1.00055
ZHaats	NVUC7S	Bladder cancer	MSH4_ENSG00000057468	Wald ratio	1	-0.000394802	0.000410146	0.335754	-0.00119869	0.000409084	0.999605	0.998802	1.00041
zHvAQ0	NVUC7S	Bladder cancer	ANKRD18B_ENSG00000230453	Wald ratio	1	2.3155e-06	0.000159771	0.988437	-0.000310835	0.000315466	1	0.999689	1.00032
ZKDnAm	NVUC7S	Bladder cancer	LINC00865_ENSG00000232229	Inverse variance weighted	2	-0.00033579	0.000170436	0.0488175	-0.000669844	-1.73544e-06	0.999664	0.99933	0.999998
zMzCP2	NVUC7S	Bladder cancer	NSF_ENSG00000073969	MR Egger	3	-0.00110639	0.0021077	0.692263	-0.00523747	0.00302469	0.998894	0.994776	1.00303
zMzCP2	NVUC7S	Bladder cancer	NSF_ENSG00000073969	Weighted median	3	0.000232594	0.000138666	0.0934691	-3.91903e-05	0.000504379	1.00023	0.999961	1.0005
zMzCP2	NVUC7S	Bladder cancer	NSF_ENSG00000073969	Inverse variance weighted	3	0.000266597	0.000121456	0.0281626	2.85438e-05	0.00050465	1.00027	1.00003	1.0005
zMzCP2	NVUC7S	Bladder cancer	NSF_ENSG00000073969	Simple mode	3	0.000227041	0.000167532	0.308115	-0.000101321	0.000555403	1.00023	0.999899	1.00056
zMzCP2	NVUC7S	Bladder cancer	NSF_ENSG00000073969	Weighted mode	3	0.000226267	0.000165361	0.304649	-9.78399e-05	0.000550374	1.00023	0.999902	1.00055
zpNbRZ	NVUC7S	Bladder cancer	FBXO17_ENSG00000269190	Wald ratio	1	-0.000460172	0.000432281	0.287093	-0.00130744	0.000387099	0.99954	0.998693	1.00039
ZsBdNF	NVUC7S	Bladder cancer	SLC7A6OS_ENSG00000103061	MR Egger	3	-0.00685438	0.00666803	0.491228	-0.0199237	0.00621496	0.993169	0.980273	1.00623
ZsBdNF	NVUC7S	Bladder cancer	SLC7A6OS_ENSG00000103061	Weighted median	3	-0.000218453	0.000278076	0.432109	-0.000763481	0.000326575	0.999782	0.999237	1.00033
ZsBdNF	NVUC7S	Bladder cancer	SLC7A6OS_ENSG00000103061	Inverse variance weighted	3	-0.000282955	0.000225612	0.209781	-0.000725153	0.000159244	0.999717	0.999275	1.00016
ZsBdNF	NVUC7S	Bladder cancer	SLC7A6OS_ENSG00000103061	Simple mode	3	-0.000140735	0.000327538	0.709295	-0.000782709	0.000501239	0.999859	0.999218	1.0005
ZsBdNF	NVUC7S	Bladder cancer	SLC7A6OS_ENSG00000103061	Weighted mode	3	-0.000144343	0.000369735	0.733901	-0.000869024	0.000580337	0.999856	0.999131	1.00058
zxFXIh	NVUC7S	Bladder cancer	LINC02347_ENSG00000214043	Wald ratio	1	-7.79578e-05	0.000308872	0.800736	-0.000683347	0.000527431	0.999922	0.999317	1.00053
ZxJ0iG	NVUC7S	Bladder cancer	CCDC7_ENSG00000216937	Inverse variance weighted	2	0.000132636	0.000266542	0.618754	-0.000389787	0.000655059	1.00013	0.99961	1.00066
zZA6yb	NVUC7S	Bladder cancer	ZNF880_ENSG00000221923	Wald ratio	1	-0.000191691	0.000257593	0.456778	-0.000696574	0.000313192	0.999808	0.999304	1.00031

## Sheet: Supplementary table 16
id.exposure	id.outcome	outcome	exposure	method	nsnp	b	se	pval	lo_ci	up_ci	or	or_lci95	or_uci95
01X7Dj	NVUC7S	Bladder cancer	AC004540.1_ENSG00000214870	Wald ratio	1	-0.00010869	0.00017214	0.527775	-0.000446084	0.000228704	0.999891	0.999554	1.00023
0ahuUA	NVUC7S	Bladder cancer	PNPLA7_ENSG00000130653	Wald ratio	1	0.000480605	0.00029306	0.101014	-9.37924e-05	0.001055	1.00048	0.999906	1.00106
0eAXdm	NVUC7S	Bladder cancer	MAEL_ENSG00000143194	Wald ratio	1	-0.000353166	0.000283455	0.21279	-0.000908738	0.000202407	0.999647	0.999092	1.0002
0forHX	NVUC7S	Bladder cancer	EXOSC6_ENSG00000223496	Inverse variance weighted	2	-0.000657081	0.000411542	0.110348	-0.0014637	0.000149541	0.999343	0.998537	1.00015
0wEvdf	NVUC7S	Bladder cancer	LCA5L_ENSG00000157578	Wald ratio	1	-0.000191464	0.000378579	0.613036	-0.000933478	0.00055055	0.999809	0.999067	1.00055
1irZPl	NVUC7S	Bladder cancer	CDK10_ENSG00000185324	Inverse variance weighted	2	-4.60652e-05	0.00029234	0.874792	-0.000619051	0.00052692	0.999954	0.999381	1.00053
1ntD9b	NVUC7S	Bladder cancer	LINC00839_ENSG00000185904	MR Egger	7	8.24861e-05	0.000417639	0.85121	-0.000736086	0.000901059	1.00008	0.999264	1.0009
1ntD9b	NVUC7S	Bladder cancer	LINC00839_ENSG00000185904	Weighted median	7	-0.000211963	0.000108944	0.0517009	-0.000425493	1.5671e-06	0.999788	0.999575	1
1ntD9b	NVUC7S	Bladder cancer	LINC00839_ENSG00000185904	Inverse variance weighted	7	-0.000154791	8.30835e-05	0.0624513	-0.000317635	8.05263e-06	0.999845	0.999682	1.00001
1ntD9b	NVUC7S	Bladder cancer	LINC00839_ENSG00000185904	Simple mode	7	-0.000261199	0.00015661	0.146394	-0.000568154	4.57561e-05	0.999739	0.999432	1.00005
1ntD9b	NVUC7S	Bladder cancer	LINC00839_ENSG00000185904	Weighted mode	7	-0.000254951	0.0001526	0.145814	-0.000554046	4.41452e-05	0.999745	0.999446	1.00004
1Tzc2q	NVUC7S	Bladder cancer	AC127024.2_ENSG00000263603	Wald ratio	1	0.000284567	0.000509672	0.576616	-0.000714389	0.00128352	1.00028	0.999286	1.00128
1w8rq1	NVUC7S	Bladder cancer	NBAS_ENSG00000151779	Wald ratio	1	0.000305577	0.000528907	0.563431	-0.00073108	0.00134223	1.00031	0.999269	1.00134
2cF0HN	NVUC7S	Bladder cancer	NRG4_ENSG00000169752	Wald ratio	1	0.000160706	0.000242838	0.508111	-0.000315256	0.000636667	1.00016	0.999685	1.00064
2GzGeB	NVUC7S	Bladder cancer	FLYWCH1_ENSG00000059122	Wald ratio	1	0.000540766	0.000306682	0.0778531	-6.03302e-05	0.00114186	1.00054	0.99994	1.00114
2J0Ke6	NVUC7S	Bladder cancer	CENPJ_ENSG00000151849	Wald ratio	1	-0.000129917	0.000383999	0.735117	-0.000882554	0.00062272	0.99987	0.999118	1.00062
2LoOEQ	NVUC7S	Bladder cancer	DYNC1I2_ENSG00000077380	Wald ratio	1	0.000585133	0.000455003	0.198444	-0.000306673	0.00147694	1.00059	0.999693	1.00148
2w0890	NVUC7S	Bladder cancer	POLQ_ENSG00000051341	MR Egger	4	0.000393216	0.00776812	0.96423	-0.0148323	0.0156187	1.00039	0.985277	1.01574
2w0890	NVUC7S	Bladder cancer	POLQ_ENSG00000051341	Weighted median	4	-0.00027079	0.000217906	0.213982	-0.000697887	0.000156306	0.999729	0.999302	1.00016
2w0890	NVUC7S	Bladder cancer	POLQ_ENSG00000051341	Inverse variance weighted	4	-0.000264373	0.000197075	0.179765	-0.00065064	0.000121895	0.999736	0.99935	1.00012
2w0890	NVUC7S	Bladder cancer	POLQ_ENSG00000051341	Simple mode	4	-0.00028512	0.000301207	0.413681	-0.000875487	0.000305246	0.999715	0.999125	1.00031
2w0890	NVUC7S	Bladder cancer	POLQ_ENSG00000051341	Weighted mode	4	-0.000285434	0.000289105	0.396286	-0.000852079	0.000281211	0.999715	0.999148	1.00028
2YI9AE	NVUC7S	Bladder cancer	FAM118A_ENSG00000100376	Inverse variance weighted	2	0.000122115	0.000138166	0.376791	-0.000148691	0.000392921	1.00012	0.999851	1.00039
3ao0je	NVUC7S	Bladder cancer	ZNF534_ENSG00000198633	Wald ratio	1	0.00037493	0.000421447	0.373667	-0.000451106	0.00120097	1.00038	0.999549	1.0012
40yMQ1	NVUC7S	Bladder cancer	CKAP2_ENSG00000136108	Inverse variance weighted	2	-4.1879e-05	0.000195541	0.830415	-0.00042514	0.000341382	0.999958	0.999575	1.00034
43aE97	NVUC7S	Bladder cancer	CFAP61_ENSG00000089101	Wald ratio	1	1.7687e-05	0.000287427	0.950933	-0.00054567	0.000581044	1.00002	0.999454	1.00058
46IJhF	NVUC7S	Bladder cancer	RNASEH2B_ENSG00000136104	Wald ratio	1	5.81337e-06	0.00019113	0.975735	-0.000368802	0.000380429	1.00001	0.999631	1.00038
4aIs5u	NVUC7S	Bladder cancer	SCAPER_ENSG00000140386	MR Egger	4	0.000497875	0.0206099	0.982921	-0.0398975	0.0408932	1.0005	0.960888	1.04174
4aIs5u	NVUC7S	Bladder cancer	SCAPER_ENSG00000140386	Weighted median	4	-0.000681656	0.000332832	0.0405553	-0.00133401	-2.93051e-05	0.999319	0.998667	0.999971
4aIs5u	NVUC7S	Bladder cancer	SCAPER_ENSG00000140386	Inverse variance weighted	4	-0.00067695	0.000292092	0.0204717	-0.00124945	-0.000104449	0.999323	0.998751	0.999896
4aIs5u	NVUC7S	Bladder cancer	SCAPER_ENSG00000140386	Simple mode	4	-0.000687402	0.000440067	0.216209	-0.00154993	0.000175129	0.999313	0.998451	1.00018
4aIs5u	NVUC7S	Bladder cancer	SCAPER_ENSG00000140386	Weighted mode	4	-0.000686835	0.000420044	0.200533	-0.00151012	0.000136452	0.999313	0.998491	1.00014
4dtkNh	NVUC7S	Bladder cancer	GTF2H2_ENSG00000145736	Inverse variance weighted	2	0.000205978	0.000205776	0.316835	-0.000197343	0.000609298	1.00021	0.999803	1.00061
4p0sQ8	NVUC7S	Bladder cancer	ACADS_ENSG00000122971	Wald ratio	1	0.000147877	0.000273518	0.58875	-0.000388218	0.000683971	1.00015	0.999612	1.00068
4vVmHe	NVUC7S	Bladder cancer	PM20D1_ENSG00000162877	Inverse variance weighted	2	0.000140192	0.000126689	0.268474	-0.000108118	0.000388501	1.00014	0.999892	1.00039
5O8ms7	NVUC7S	Bladder cancer	NPIPB2_ENSG00000234719	Wald ratio	1	0.00010044	0.000197169	0.610464	-0.000286012	0.000486892	1.0001	0.999714	1.00049
5suQmb	NVUC7S	Bladder cancer	OSGEP_ENSG00000092094	Wald ratio	1	0.000605439	0.000469222	0.196945	-0.000314236	0.00152511	1.00061	0.999686	1.00153
5xSqQS	NVUC7S	Bladder cancer	NBPF26_ENSG00000273136	Wald ratio	1	-0.00018267	0.0003386	0.589551	-0.000846326	0.000480986	0.999817	0.999154	1.00048
61wMbE	NVUC7S	Bladder cancer	PSMD13_ENSG00000185627	Wald ratio	1	-0.000161358	0.000359062	0.653152	-0.00086512	0.000542404	0.999839	0.999135	1.00054
6HShBQ	NVUC7S	Bladder cancer	PDPK1_ENSG00000140992	Wald ratio	1	-0.000236024	0.000339923	0.487466	-0.000902273	0.000430226	0.999764	0.999098	1.00043
6Kachu	NVUC7S	Bladder cancer	HLCS_ENSG00000159267	Inverse variance weighted	2	0.000279101	0.000274296	0.308908	-0.00025852	0.000816721	1.00028	0.999742	1.00082
6mqdYN	NVUC7S	Bladder cancer	CCDC40_ENSG00000141519	Wald ratio	1	-0.00030333	0.000252439	0.229521	-0.000798111	0.000191452	0.999697	0.999202	1.00019
6OOAu4	NVUC7S	Bladder cancer	ZNF559-ZNF177_ENSG00000270011	Inverse variance weighted	2	0.000100022	0.00024033	0.677275	-0.000371025	0.000571068	1.0001	0.999629	1.00057
6yMiRd	NVUC7S	Bladder cancer	DNAJC15_ENSG00000120675	Wald ratio	1	4.28294e-06	0.000181415	0.981165	-0.000351291	0.000359857	1	0.999649	1.00036
6zIQZr	NVUC7S	Bladder cancer	EFCAB2_ENSG00000203666	Wald ratio	1	-0.000394725	0.00038202	0.301483	-0.00114349	0.000354034	0.999605	0.998857	1.00035
6zvBwB	NVUC7S	Bladder cancer	SRA1_ENSG00000213523	MR Egger	3	-0.00160377	0.00569656	0.825292	-0.012769	0.00956148	0.998398	0.987312	1.00961
6zvBwB	NVUC7S	Bladder cancer	SRA1_ENSG00000213523	Weighted median	3	0.000293731	0.000238341	0.217801	-0.000173418	0.00076088	1.00029	0.999827	1.00076
6zvBwB	NVUC7S	Bladder cancer	SRA1_ENSG00000213523	Inverse variance weighted	3	0.00032383	0.000209452	0.122085	-8.66965e-05	0.000734356	1.00032	0.999913	1.00073
6zvBwB	NVUC7S	Bladder cancer	SRA1_ENSG00000213523	Simple mode	3	0.000279504	0.000281193	0.424969	-0.000271634	0.000830641	1.00028	0.999728	1.00083
6zvBwB	NVUC7S	Bladder cancer	SRA1_ENSG00000213523	Weighted mode	3	0.000279504	0.000269663	0.408858	-0.000249036	0.000808043	1.00028	0.999751	1.00081
7LwTp6	NVUC7S	Bladder cancer	CCDC144NL_ENSG00000205212	Wald ratio	1	0.000118255	0.000207858	0.569408	-0.000289147	0.000525657	1.00012	0.999711	1.00053
89yU3N	NVUC7S	Bladder cancer	ANKRD36_ENSG00000135976	MR Egger	6	-0.00012654	0.0012496	0.924213	-0.00257575	0.00232267	0.999873	0.997428	1.00233
89yU3N	NVUC7S	Bladder cancer	ANKRD36_ENSG00000135976	Weighted median	6	0.000501294	0.0002013	0.012764	0.000106747	0.000895841	1.0005	1.00011	1.0009
89yU3N	NVUC7S	Bladder cancer	ANKRD36_ENSG00000135976	Inverse variance weighted	6	0.000552841	0.000166556	0.000902614	0.000226391	0.000879292	1.00055	1.00023	1.00088
89yU3N	NVUC7S	Bladder cancer	ANKRD36_ENSG00000135976	Simple mode	6	0.000484774	0.000263068	0.124702	-3.08383e-05	0.00100039	1.00048	0.999969	1.001
89yU3N	NVUC7S	Bladder cancer	ANKRD36_ENSG00000135976	Weighted mode	6	0.000480833	0.000262018	0.125936	-3.27222e-05	0.000994388	1.00048	0.999967	1.00099
8DH4fX	NVUC7S	Bladder cancer	LINC01115_ENSG00000237667	Wald ratio	1	-7.66557e-05	0.000210542	0.715793	-0.000489318	0.000336007	0.999923	0.999511	1.00034
8hPAsz	NVUC7S	Bladder cancer	FIGNL1_ENSG00000132436	Wald ratio	1	-0.000314638	0.000270879	0.245419	-0.000845561	0.000216284	0.999685	0.999155	1.00022
8nvS74	NVUC7S	Bladder cancer	TTC12_ENSG00000149292	Wald ratio	1	0.000234458	0.00018207	0.197839	-0.0001224	0.000591316	1.00023	0.999878	1.00059
8POgWx	NVUC7S	Bladder cancer	TNS2_ENSG00000111077	Wald ratio	1	0.00029525	0.000296965	0.320113	-0.000286801	0.000877301	1.0003	0.999713	1.00088
9HRhzV	NVUC7S	Bladder cancer	POLD3_ENSG00000077514	Wald ratio	1	-0.000367529	0.000348075	0.291018	-0.00104975	0.000314698	0.999633	0.998951	1.00031
9OlvGb	NVUC7S	Bladder cancer	AC007040.2_ENSG00000258881	Wald ratio	1	-1.41383e-05	0.000285059	0.960443	-0.000572853	0.000544577	0.999986	0.999427	1.00054
9SxY33	NVUC7S	Bladder cancer	OR2M3_ENSG00000228198	Wald ratio	1	-6.42743e-05	0.000283859	0.820867	-0.000620639	0.00049209	0.999936	0.99938	1.00049
9yc79s	NVUC7S	Bladder cancer	CLHC1_ENSG00000162994	Wald ratio	1	9.20866e-05	0.000228631	0.687115	-0.000356031	0.000540204	1.00009	0.999644	1.00054
9zS36v	NVUC7S	Bladder cancer	UVSSA_ENSG00000163945	Wald ratio	1	-0.000124054	0.000319048	0.697405	-0.000749388	0.00050128	0.999876	0.999251	1.0005
A3zIo9	NVUC7S	Bladder cancer	SPINK9_ENSG00000204909	Wald ratio	1	0.000161319	0.000344723	0.639809	-0.000514339	0.000836977	1.00016	0.999486	1.00084
A6Jhu5	NVUC7S	Bladder cancer	IQCB1_ENSG00000173226	Inverse variance weighted	2	0.000338509	0.000237655	0.154338	-0.000127294	0.000804313	1.00034	0.999873	1.0008
AA3LPb	NVUC7S	Bladder cancer	BICC1_ENSG00000122870	Wald ratio	1	-0.000322389	0.000211616	0.127642	-0.000737156	9.23776e-05	0.999678	0.999263	1.00009
AdWZgA	NVUC7S	Bladder cancer	CTBS_ENSG00000117151	Wald ratio	1	0.000105537	0.000308906	0.732617	-0.000499919	0.000710993	1.00011	0.9995	1.00071
akuMkH	NVUC7S	Bladder cancer	AK3_ENSG00000147853	Wald ratio	1	0.00058666	0.000321645	0.0681622	-4.37653e-05	0.00121709	1.00059	0.999956	1.00122
amWcHJ	NVUC7S	Bladder cancer	C9orf72_ENSG00000147894	Wald ratio	1	0.000238614	0.000265759	0.369263	-0.000282275	0.000759502	1.00024	0.999718	1.00076
AoSm8T	NVUC7S	Bladder cancer	LINC02482_ENSG00000251580	Wald ratio	1	0.000195491	0.000410507	0.633919	-0.000609103	0.00100008	1.0002	0.999391	1.001
az9uHc	NVUC7S	Bladder cancer	INPP5B_ENSG00000204084	Inverse variance weighted	2	-0.000540382	0.000295462	0.0674086	-0.00111949	3.87233e-05	0.99946	0.998881	1.00004
B6OXx6	NVUC7S	Bladder cancer	MRAS_ENSG00000158186	Wald ratio	1	0.000153705	0.000359916	0.669337	-0.00055173	0.000859139	1.00015	0.999448	1.00086
BEehPv	NVUC7S	Bladder cancer	GSTM3_ENSG00000134202	Wald ratio	1	-0.000224721	0.000380577	0.554872	-0.000970652	0.000521209	0.999775	0.99903	1.00052
BESvTz	NVUC7S	Bladder cancer	RFTN1_ENSG00000131378	Wald ratio	1	0.000282444	0.000304484	0.353607	-0.000314345	0.000879233	1.00028	0.999686	1.00088
BFzISY	NVUC7S	Bladder cancer	ADAL_ENSG00000168803	MR Egger	3	0.000370247	0.00406896	0.942231	-0.00760491	0.0083454	1.00037	0.992424	1.00838
BFzISY	NVUC7S	Bladder cancer	ADAL_ENSG00000168803	Weighted median	3	0.000107815	0.000223161	0.629007	-0.00032958	0.00054521	1.00011	0.99967	1.00055
BFzISY	NVUC7S	Bladder cancer	ADAL_ENSG00000168803	Inverse variance weighted	3	0.000100942	0.00018872	0.592736	-0.00026895	0.000470834	1.0001	0.999731	1.00047
BFzISY	NVUC7S	Bladder cancer	ADAL_ENSG00000168803	Simple mode	3	0.000109222	0.00024793	0.702589	-0.00037672	0.000595164	1.00011	0.999623	1.0006
BFzISY	NVUC7S	Bladder cancer	ADAL_ENSG00000168803	Weighted mode	3	0.000109519	0.000247138	0.700982	-0.000374872	0.00059391	1.00011	0.999625	1.00059
BN90Z7	NVUC7S	Bladder cancer	LY6G5C_ENSG00000204428	Wald ratio	1	0.000118345	0.000284004	0.676897	-0.000438303	0.000674992	1.00012	0.999562	1.00068
BooOCs	NVUC7S	Bladder cancer	C20orf96_ENSG00000196476	Wald ratio	1	-0.000584056	0.000328492	0.0754054	-0.0012279	5.97888e-05	0.999416	0.998773	1.00006
BqVcU2	NVUC7S	Bladder cancer	MFSD13A_ENSG00000138111	Inverse variance weighted	2	-5.60692e-05	0.000193006	0.77143	-0.000434361	0.000322222	0.999944	0.999566	1.00032
bv2zqp	NVUC7S	Bladder cancer	TTC32_ENSG00000183891	Wald ratio	1	2.14246e-05	0.000346498	0.950697	-0.000657712	0.000700561	1.00002	0.999343	1.0007
bwsU2C	NVUC7S	Bladder cancer	LSM6_ENSG00000164167	Wald ratio	1	7.56766e-05	0.000367264	0.836748	-0.00064416	0.000795513	1.00008	0.999356	1.0008
BX0d6S	NVUC7S	Bladder cancer	AL589843.1_ENSG00000224848	MR Egger	3	-0.000902873	0.0015782	0.669183	-0.00399614	0.00219039	0.999098	0.996012	1.00219
BX0d6S	NVUC7S	Bladder cancer	AL589843.1_ENSG00000224848	Weighted median	3	0.000315579	0.000169942	0.0633144	-1.75079e-05	0.000648667	1.00032	0.999982	1.00065
BX0d6S	NVUC7S	Bladder cancer	AL589843.1_ENSG00000224848	Inverse variance weighted	3	0.000257985	0.00014296	0.0711384	-2.2217e-05	0.000538187	1.00026	0.999978	1.00054
BX0d6S	NVUC7S	Bladder cancer	AL589843.1_ENSG00000224848	Simple mode	3	0.000342102	0.000193996	0.219877	-3.81299e-05	0.000722333	1.00034	0.999962	1.00072
BX0d6S	NVUC7S	Bladder cancer	AL589843.1_ENSG00000224848	Weighted mode	3	0.000333914	0.000202354	0.240697	-6.26986e-05	0.000730527	1.00033	0.999937	1.00073
CA4HrL	NVUC7S	Bladder cancer	NPIPB13_ENSG00000198064	Wald ratio	1	-0.000785756	0.000460257	0.0877829	-0.00168786	0.000116348	0.999215	0.998314	1.00012
CdJO0R	NVUC7S	Bladder cancer	APTX_ENSG00000137074	Wald ratio	1	8.42986e-05	0.000272027	0.756644	-0.000448874	0.000617472	1.00008	0.999551	1.00062
cEsKq4	NVUC7S	Bladder cancer	TAF1C_ENSG00000103168	Wald ratio	1	0.000104929	0.000309757	0.734801	-0.000502195	0.000712053	1.0001	0.999498	1.00071
CHcR0a	NVUC7S	Bladder cancer	ECM2_ENSG00000106823	MR Egger	5	-0.00192563	0.00219759	0.4454	-0.00623291	0.00238165	0.998076	0.993786	1.00238
CHcR0a	NVUC7S	Bladder cancer	ECM2_ENSG00000106823	Weighted median	5	-0.000129608	0.000233712	0.579193	-0.000587684	0.000328467	0.99987	0.999412	1.00033
CHcR0a	NVUC7S	Bladder cancer	ECM2_ENSG00000106823	Inverse variance weighted	5	-1.76237e-05	0.000189712	0.925985	-0.000389458	0.000354211	0.999982	0.999611	1.00035
CHcR0a	NVUC7S	Bladder cancer	ECM2_ENSG00000106823	Simple mode	5	-0.000155858	0.000295486	0.625773	-0.000735011	0.000423294	0.999844	0.999265	1.00042
CHcR0a	NVUC7S	Bladder cancer	ECM2_ENSG00000106823	Weighted mode	5	-0.000156973	0.000311913	0.641231	-0.000768323	0.000454376	0.999843	0.999232	1.00045
chq6AH	NVUC7S	Bladder cancer	RAB27A_ENSG00000069974	Wald ratio	1	0.000105674	0.000332491	0.750617	-0.000546007	0.000757356	1.00011	0.999454	1.00076
CizGSk	NVUC7S	Bladder cancer	ADAMTS20_ENSG00000173157	Inverse variance weighted	2	-0.000101364	0.000196139	0.605298	-0.000485796	0.000283068	0.999899	0.999514	1.00028
CLrLvK	NVUC7S	Bladder cancer	DDX11_ENSG00000013573	Wald ratio	1	-4.20886e-05	0.000169208	0.803563	-0.000373736	0.000289559	0.999958	0.999626	1.00029
cLsztn	NVUC7S	Bladder cancer	B3GNTL1_ENSG00000175711	Wald ratio	1	-0.000138595	0.000285335	0.627161	-0.000697852	0.000420662	0.999861	0.999302	1.00042
DAkRES	NVUC7S	Bladder cancer	AC010615.4_ENSG00000269237	MR Egger	3	-0.000593033	0.00240372	0.846012	-0.00530433	0.00411827	0.999407	0.99471	1.00413
DAkRES	NVUC7S	Bladder cancer	AC010615.4_ENSG00000269237	Weighted median	3	0.00020437	0.000157309	0.193889	-0.000103956	0.000512697	1.0002	0.999896	1.00051
DAkRES	NVUC7S	Bladder cancer	AC010615.4_ENSG00000269237	Inverse variance weighted	3	0.000116872	0.000145835	0.4229	-0.000168964	0.000402708	1.00012	0.999831	1.0004
DAkRES	NVUC7S	Bladder cancer	AC010615.4_ENSG00000269237	Simple mode	3	0.000263467	0.000215684	0.346327	-0.000159274	0.000686207	1.00026	0.999841	1.00069
DAkRES	NVUC7S	Bladder cancer	AC010615.4_ENSG00000269237	Weighted mode	3	0.000276696	0.000227692	0.348271	-0.000169581	0.000722972	1.00028	0.99983	1.00072
daKwzE	NVUC7S	Bladder cancer	AC027020.2_ENSG00000270127	Wald ratio	1	0.000232925	0.000285007	0.413779	-0.000325689	0.000791539	1.00023	0.999674	1.00079
dgCdAW	NVUC7S	Bladder cancer	WBP2NL_ENSG00000183066	Inverse variance weighted	2	8.06325e-05	0.00021769	0.711084	-0.00034604	0.000507305	1.00008	0.999654	1.00051
DHGX23	NVUC7S	Bladder cancer	PHACTR4_ENSG00000204138	MR Egger	3	0.000419748	0.00208817	0.873715	-0.00367306	0.00451256	1.00042	0.996334	1.00452
DHGX23	NVUC7S	Bladder cancer	PHACTR4_ENSG00000204138	Weighted median	3	-0.000620051	0.000259419	0.0168413	-0.00112851	-0.00011159	0.99938	0.998872	0.999888
DHGX23	NVUC7S	Bladder cancer	PHACTR4_ENSG00000204138	Inverse variance weighted	3	-0.000665859	0.000218075	0.002263	-0.00109328	-0.000238432	0.999334	0.998907	0.999762
DHGX23	NVUC7S	Bladder cancer	PHACTR4_ENSG00000204138	Simple mode	3	-0.000606127	0.000296766	0.177848	-0.00118779	-2.4466e-05	0.999394	0.998813	0.999976
DHGX23	NVUC7S	Bladder cancer	PHACTR4_ENSG00000204138	Weighted mode	3	-0.000603614	0.000293433	0.175953	-0.00117874	-2.84849e-05	0.999397	0.998822	0.999972
DL1ERX	NVUC7S	Bladder cancer	XRRA1_ENSG00000166435	Wald ratio	1	0.000127672	0.000153766	0.406368	-0.000173709	0.000429054	1.00013	0.999826	1.00043
dmKUaM	NVUC7S	Bladder cancer	SNX8_ENSG00000106266	Wald ratio	1	-2.73728e-05	0.000237675	0.908311	-0.000493216	0.00043847	0.999973	0.999507	1.00044
DswKPV	NVUC7S	Bladder cancer	ALG8_ENSG00000159063	Wald ratio	1	-0.000101938	0.00031956	0.74973	-0.000728276	0.000524399	0.999898	0.999272	1.00052
DtLxLf	NVUC7S	Bladder cancer	ANKRD30BL_ENSG00000163046	Wald ratio	1	3.97834e-05	0.000352694	0.91019	-0.000651497	0.000731064	1.00004	0.999349	1.00073
DWJ7gY	NVUC7S	Bladder cancer	ATP6AP1L_ENSG00000205464	MR Egger	3	2.2584e-05	0.00129313	0.988883	-0.00251195	0.00255711	1.00002	0.997491	1.00256
DWJ7gY	NVUC7S	Bladder cancer	ATP6AP1L_ENSG00000205464	Weighted median	3	0.000106041	0.000129526	0.412966	-0.00014783	0.000359911	1.00011	0.999852	1.00036
DWJ7gY	NVUC7S	Bladder cancer	ATP6AP1L_ENSG00000205464	Inverse variance weighted	3	7.75351e-05	0.000116987	0.50748	-0.000151759	0.000306829	1.00008	0.999848	1.00031
DWJ7gY	NVUC7S	Bladder cancer	ATP6AP1L_ENSG00000205464	Simple mode	3	0.000125855	0.000164224	0.52356	-0.000196025	0.000447735	1.00013	0.999804	1.00045
DWJ7gY	NVUC7S	Bladder cancer	ATP6AP1L_ENSG00000205464	Weighted mode	3	0.000125197	0.000161378	0.51904	-0.000191103	0.000441498	1.00013	0.999809	1.00044
Dyi1l6	NVUC7S	Bladder cancer	RSU1_ENSG00000148484	Wald ratio	1	-0.000192042	0.00028211	0.496039	-0.000744978	0.000360893	0.999808	0.999255	1.00036
DYiuQx	NVUC7S	Bladder cancer	PDGFRL_ENSG00000104213	Wald ratio	1	0.000465596	0.000273902	0.0891566	-7.12518e-05	0.00100244	1.00047	0.999929	1.001
eaZeyp	NVUC7S	Bladder cancer	PWRN1_ENSG00000259905	Wald ratio	1	-0.000331773	0.000712181	0.641319	-0.00172765	0.0010641	0.999668	0.998274	1.00106
EcUwG7	NVUC7S	Bladder cancer	DRAM2_ENSG00000156171	Wald ratio	1	-0.000475207	0.000306824	0.121431	-0.00107658	0.000126167	0.999525	0.998924	1.00013
Ecwie4	NVUC7S	Bladder cancer	OR2L13_ENSG00000196071	Wald ratio	1	-7.26264e-05	0.000253869	0.774818	-0.00057021	0.000424957	0.999927	0.99943	1.00043
eHxMc5	NVUC7S	Bladder cancer	AC093151.3_ENSG00000235358	Wald ratio	1	0.000110236	0.000227846	0.628514	-0.000336342	0.000556815	1.00011	0.999664	1.00056
EjO8Ed	NVUC7S	Bladder cancer	SMC2_ENSG00000136824	Inverse variance weighted	2	0.000337592	0.000219645	0.124297	-9.2913e-05	0.000768096	1.00034	0.999907	1.00077
eNnME3	NVUC7S	Bladder cancer	CENPP_ENSG00000188312	MR Egger	6	-0.000366683	0.000460974	0.470885	-0.00127019	0.000536827	0.999633	0.998731	1.00054
eNnME3	NVUC7S	Bladder cancer	CENPP_ENSG00000188312	Weighted median	6	-6.44436e-05	0.000108871	0.553901	-0.000277831	0.000148944	0.999936	0.999722	1.00015
eNnME3	NVUC7S	Bladder cancer	CENPP_ENSG00000188312	Inverse variance weighted	6	6.00466e-06	8.77436e-05	0.94544	-0.000165973	0.000177982	1.00001	0.999834	1.00018
eNnME3	NVUC7S	Bladder cancer	CENPP_ENSG00000188312	Simple mode	6	-5.67471e-05	0.00014599	0.713495	-0.000342887	0.000229393	0.999943	0.999657	1.00023
eNnME3	NVUC7S	Bladder cancer	CENPP_ENSG00000188312	Weighted mode	6	-6.27155e-05	0.000146415	0.686228	-0.000349689	0.000224258	0.999937	0.99965	1.00022
EqTVjU	NVUC7S	Bladder cancer	RPIA_ENSG00000153574	Inverse variance weighted	2	0.000230233	0.000178932	0.198197	-0.000120474	0.00058094	1.00023	0.99988	1.00058
eSvY1q	NVUC7S	Bladder cancer	AC005154.5_ENSG00000281039	Wald ratio	1	-0.000403597	0.000285652	0.157686	-0.000963476	0.000156281	0.999596	0.999037	1.00016
ESxFSh	NVUC7S	Bladder cancer	GSTT2B_ENSG00000133433	Wald ratio	1	-0.000311848	0.00026353	0.236671	-0.000828366	0.00020467	0.999688	0.999172	1.0002
eyJNwN	NVUC7S	Bladder cancer	DPH1_ENSG00000108963	Wald ratio	1	-0.000258925	0.000252221	0.304617	-0.000753278	0.000235428	0.999741	0.999247	1.00024
F1BmVU	NVUC7S	Bladder cancer	OR2L3_ENSG00000198128	Wald ratio	1	-4.11864e-05	0.000181895	0.820867	-0.0003977	0.000315327	0.999959	0.999602	1.00032
f1mxWz	NVUC7S	Bladder cancer	PLEC_ENSG00000178209	Wald ratio	1	-0.000170814	0.000466873	0.714463	-0.00108589	0.000744258	0.999829	0.998915	1.00074
F9SkCQ	NVUC7S	Bladder cancer	Z99774.1_ENSG00000206028	Wald ratio	1	6.62517e-05	0.000344686	0.847579	-0.000609332	0.000741836	1.00007	0.999391	1.00074
fcHVK8	NVUC7S	Bladder cancer	AC233280.1_ENSG00000229178	Wald ratio	1	0.000371323	0.000368917	0.314164	-0.000351754	0.0010944	1.00037	0.999648	1.0011
FcYh6T	NVUC7S	Bladder cancer	DSCC1_ENSG00000136982	Wald ratio	1	-9.66363e-05	0.0002488	0.697713	-0.000584284	0.000391012	0.999903	0.999416	1.00039
FdTZ8w	NVUC7S	Bladder cancer	CA8_ENSG00000178538	Wald ratio	1	0.000360704	0.000239022	0.131278	-0.00010778	0.000829188	1.00036	0.999892	1.00083
FFqx7K	NVUC7S	Bladder cancer	NQO2_ENSG00000124588	Wald ratio	1	0.00046337	0.000358263	0.19588	-0.000238826	0.00116557	1.00046	0.999761	1.00117
FhAJAa	NVUC7S	Bladder cancer	FN3K_ENSG00000167363	Wald ratio	1	0.000767229	0.000396471	0.0529726	-9.85454e-06	0.00154431	1.00077	0.99999	1.00155
FIn2UM	NVUC7S	Bladder cancer	SCGB2B2_ENSG00000205209	Wald ratio	1	-4.03874e-06	0.000389235	0.991721	-0.00076694	0.000758863	0.999996	0.999233	1.00076
FmHrlQ	NVUC7S	Bladder cancer	CDC7_ENSG00000097046	Wald ratio	1	5.04009e-05	0.000244033	0.836374	-0.000427904	0.000528706	1.00005	0.999572	1.00053
FOidrZ	NVUC7S	Bladder cancer	XKR6_ENSG00000171044	Inverse variance weighted	2	-0.000641064	0.000438535	0.143787	-0.00150059	0.000218464	0.999359	0.998501	1.00022
FRni0B	NVUC7S	Bladder cancer	TPTEP2-CSNK1E_ENSG00000283900	Wald ratio	1	0.000518971	0.000326313	0.111743	-0.000120603	0.00115855	1.00052	0.999879	1.00116
fRUOQv	NVUC7S	Bladder cancer	CRYBG1_ENSG00000112297	Wald ratio	1	-0.000522736	0.000328033	0.111038	-0.00116568	0.00012021	0.999477	0.998835	1.00012
FU38lD	NVUC7S	Bladder cancer	FIGN_ENSG00000182263	Wald ratio	1	0.000908292	0.00055449	0.101407	-0.000178508	0.00199509	1.00091	0.999822	1.002
fW0uLE	NVUC7S	Bladder cancer	GNB3_ENSG00000111664	Wald ratio	1	-0.000112983	0.000341541	0.740792	-0.000782404	0.000556438	0.999887	0.999218	1.00056
Fw2nif	NVUC7S	Bladder cancer	FARP2_ENSG00000006607	Wald ratio	1	0.000433261	0.00029608	0.143378	-0.000147055	0.00101358	1.00043	0.999853	1.00101
g76fjP	NVUC7S	Bladder cancer	C1QTNF7_ENSG00000163145	Wald ratio	1	0.000584582	0.000338907	0.0845447	-7.96755e-05	0.00124884	1.00058	0.99992	1.00125
gDkjft	NVUC7S	Bladder cancer	DCT_ENSG00000080166	Wald ratio	1	0.000270475	0.00025529	0.289381	-0.000229893	0.000770842	1.00027	0.99977	1.00077
gggyHM	NVUC7S	Bladder cancer	SUMF1_ENSG00000144455	Wald ratio	1	-5.21159e-05	0.000308546	0.865869	-0.000656866	0.000552634	0.999948	0.999343	1.00055
gHhgVt	NVUC7S	Bladder cancer	AC011478.1_ENSG00000267760	Wald ratio	1	-0.000266188	0.00031214	0.393779	-0.000877982	0.000345606	0.999734	0.999122	1.00035
gHUgtH	NVUC7S	Bladder cancer	CERS5_ENSG00000139624	Inverse variance weighted	2	-8.00044e-05	0.000182866	0.661747	-0.000438421	0.000278413	0.99992	0.999562	1.00028
gK4QTB	NVUC7S	Bladder cancer	AC090403.1_ENSG00000264151	Wald ratio	1	-0.000128093	0.000185088	0.488897	-0.000490865	0.00023468	0.999872	0.999509	1.00023
GS7Mwo	NVUC7S	Bladder cancer	OGN_ENSG00000106809	Inverse variance weighted	2	-0.000140605	0.000256332	0.583331	-0.000643017	0.000361806	0.999859	0.999357	1.00036
gUzlPf	NVUC7S	Bladder cancer	SFXN4_ENSG00000183605	Wald ratio	1	7.35175e-05	0.000229898	0.749132	-0.000377082	0.000524117	1.00007	0.999623	1.00052
Gvgn5c	NVUC7S	Bladder cancer	TOGARAM2_ENSG00000189350	Inverse variance weighted	2	2.49305e-05	0.000116356	0.830344	-0.000203127	0.000252988	1.00002	0.999797	1.00025
h2bTeB	NVUC7S	Bladder cancer	ITGA1_ENSG00000213949	Wald ratio	1	-0.000430313	0.000360116	0.232116	-0.00113614	0.000275515	0.99957	0.998865	1.00028
HbhmIv	NVUC7S	Bladder cancer	PRPH2_ENSG00000112619	Inverse variance weighted	2	5.10305e-05	0.000200248	0.798849	-0.000341455	0.000443516	1.00005	0.999659	1.00044
hEDutw	NVUC7S	Bladder cancer	SNRPF_ENSG00000139343	Wald ratio	1	-0.000194081	0.000297148	0.513662	-0.000776491	0.000388329	0.999806	0.999224	1.00039
hhst6Q	NVUC7S	Bladder cancer	PHC2_ENSG00000134686	Wald ratio	1	-0.000339805	0.000393553	0.387902	-0.00111117	0.000431559	0.99966	0.998889	1.00043
HKf5I2	NVUC7S	Bladder cancer	WDR73_ENSG00000177082	Wald ratio	1	5.87076e-05	0.00050435	0.907334	-0.000929818	0.00104723	1.00006	0.999071	1.00105
hLSSP3	NVUC7S	Bladder cancer	CCDC90B_ENSG00000137500	Wald ratio	1	0.000572721	0.000476489	0.229378	-0.000361197	0.00150664	1.00057	0.999639	1.00151
HnGJWe	NVUC7S	Bladder cancer	RHD_ENSG00000187010	Wald ratio	1	-5.59681e-05	0.000210322	0.790157	-0.0004682	0.000356264	0.999944	0.999532	1.00036
hOVRYM	NVUC7S	Bladder cancer	TPCN2_ENSG00000162341	Wald ratio	1	0.000480169	0.000400553	0.230619	-0.000304915	0.00126525	1.00048	0.999695	1.00127
HQlHQv	NVUC7S	Bladder cancer	AC010967.1_ENSG00000228033	Wald ratio	1	5.24458e-05	0.000330929	0.874078	-0.000596174	0.000701066	1.00005	0.999404	1.0007
htDNkO	NVUC7S	Bladder cancer	GAS8_ENSG00000141013	MR Egger	4	0.000247997	0.00174639	0.90009	-0.00317493	0.00367093	1.00025	0.99683	1.00368
htDNkO	NVUC7S	Bladder cancer	GAS8_ENSG00000141013	Weighted median	4	-0.000129871	0.00011881	0.274351	-0.000362738	0.000102997	0.99987	0.999637	1.0001
htDNkO	NVUC7S	Bladder cancer	GAS8_ENSG00000141013	Inverse variance weighted	4	-0.000121545	0.000109283	0.266051	-0.000335739	9.26496e-05	0.999878	0.999664	1.00009
htDNkO	NVUC7S	Bladder cancer	GAS8_ENSG00000141013	Simple mode	4	-0.000158068	0.000160765	0.397997	-0.000473166	0.000157031	0.999842	0.999527	1.00016
htDNkO	NVUC7S	Bladder cancer	GAS8_ENSG00000141013	Weighted mode	4	-0.000150155	0.00016066	0.418931	-0.000465048	0.000164738	0.99985	0.999535	1.00016
hVtiF1	NVUC7S	Bladder cancer	LINS1_ENSG00000140471	Wald ratio	1	0.000284257	0.000347816	0.413779	-0.000397463	0.000965977	1.00028	0.999603	1.00097
HwJalg	NVUC7S	Bladder cancer	CCDC32_ENSG00000128891	MR Egger	4	0.00141094	0.0020349	0.559777	-0.00257747	0.00539934	1.00141	0.997426	1.00541
HwJalg	NVUC7S	Bladder cancer	CCDC32_ENSG00000128891	Weighted median	4	-0.000222528	0.000145559	0.126318	-0.000507823	6.27671e-05	0.999777	0.999492	1.00006
HwJalg	NVUC7S	Bladder cancer	CCDC32_ENSG00000128891	Inverse variance weighted	4	-0.000233837	0.000131404	0.0751525	-0.000491389	2.37141e-05	0.999766	0.999509	1.00002
HwJalg	NVUC7S	Bladder cancer	CCDC32_ENSG00000128891	Simple mode	4	-0.000205277	0.000209731	0.399876	-0.000616349	0.000205795	0.999795	0.999384	1.00021
HwJalg	NVUC7S	Bladder cancer	CCDC32_ENSG00000128891	Weighted mode	4	-0.000207086	0.000205263	0.387347	-0.000609402	0.00019523	0.999793	0.999391	1.0002
I1m6p9	NVUC7S	Bladder cancer	JAM2_ENSG00000154721	Wald ratio	1	-0.000465655	0.000261679	0.0751589	-0.000978545	4.72347e-05	0.999534	0.999022	1.00005
Icaq4m	NVUC7S	Bladder cancer	KCNN4_ENSG00000104783	Wald ratio	1	-4.27195e-06	0.000240797	0.985846	-0.000476234	0.00046769	0.999996	0.999524	1.00047
IfxB35	NVUC7S	Bladder cancer	PAH_ENSG00000171759	Wald ratio	1	0.000349975	0.000228179	0.125085	-9.72555e-05	0.000797205	1.00035	0.999903	1.0008
IgqIDN	NVUC7S	Bladder cancer	MAP2K5_ENSG00000137764	Inverse variance weighted	2	6.87869e-05	0.000247576	0.781134	-0.000416462	0.000554035	1.00007	0.999584	1.00055
IHzeED	NVUC7S	Bladder cancer	ARL17B_ENSG00000228696	MR Egger	8	-0.000143553	0.000251911	0.589458	-0.000637298	0.000350192	0.999856	0.999363	1.00035
IHzeED	NVUC7S	Bladder cancer	ARL17B_ENSG00000228696	Weighted median	8	6.16063e-05	5.61471e-05	0.272541	-4.84421e-05	0.000171655	1.00006	0.999952	1.00017
IHzeED	NVUC7S	Bladder cancer	ARL17B_ENSG00000228696	Inverse variance weighted	8	7.96709e-05	4.67622e-05	0.0884285	-1.1983e-05	0.000171325	1.00008	0.999988	1.00017
IHzeED	NVUC7S	Bladder cancer	ARL17B_ENSG00000228696	Simple mode	8	5.88667e-05	8.35403e-05	0.50379	-0.000104872	0.000222606	1.00006	0.999895	1.00022
IHzeED	NVUC7S	Bladder cancer	ARL17B_ENSG00000228696	Weighted mode	8	5.88667e-05	7.67417e-05	0.468113	-9.15469e-05	0.00020928	1.00006	0.999908	1.00021
ikEJ7u	NVUC7S	Bladder cancer	LRRC37A2_ENSG00000238083	MR Egger	8	-0.000213969	0.000399625	0.611611	-0.000997234	0.000569297	0.999786	0.999003	1.00057
ikEJ7u	NVUC7S	Bladder cancer	LRRC37A2_ENSG00000238083	Weighted median	8	8.02857e-05	7.01141e-05	0.25218	-5.71381e-05	0.000217709	1.00008	0.999943	1.00022
ikEJ7u	NVUC7S	Bladder cancer	LRRC37A2_ENSG00000238083	Inverse variance weighted	8	9.7182e-05	5.91112e-05	0.100165	-1.8676e-05	0.00021304	1.0001	0.999981	1.00021
ikEJ7u	NVUC7S	Bladder cancer	LRRC37A2_ENSG00000238083	Simple mode	8	7.83047e-05	0.000105187	0.480854	-0.000127862	0.000284472	1.00008	0.999872	1.00028
ikEJ7u	NVUC7S	Bladder cancer	LRRC37A2_ENSG00000238083	Weighted mode	8	7.7822e-05	0.000101408	0.467925	-0.000120938	0.000276582	1.00008	0.999879	1.00028
ilPOtX	NVUC7S	Bladder cancer	INTS10_ENSG00000104613	Wald ratio	1	-4.76271e-05	0.000421598	0.910056	-0.000873959	0.000778705	0.999952	0.999126	1.00078
ISaaT4	NVUC7S	Bladder cancer	COQ9_ENSG00000088682	Wald ratio	1	0.000138387	0.000326311	0.671497	-0.000501182	0.000777955	1.00014	0.999499	1.00078
IVJM19	NVUC7S	Bladder cancer	ZSCAN31_ENSG00000235109	MR Egger	4	0.000115417	0.000766369	0.894107	-0.00138667	0.0016175	1.00012	0.998614	1.00162
IVJM19	NVUC7S	Bladder cancer	ZSCAN31_ENSG00000235109	Weighted median	4	1.83402e-05	0.000121885	0.880392	-0.000220554	0.000257234	1.00002	0.999779	1.00026
IVJM19	NVUC7S	Bladder cancer	ZSCAN31_ENSG00000235109	Inverse variance weighted	4	1.88996e-05	0.000109094	0.862462	-0.000194924	0.000232724	1.00002	0.999805	1.00023
IVJM19	NVUC7S	Bladder cancer	ZSCAN31_ENSG00000235109	Simple mode	4	-1.62522e-06	0.000151851	0.992133	-0.000299253	0.000296003	0.999998	0.999701	1.0003
IVJM19	NVUC7S	Bladder cancer	ZSCAN31_ENSG00000235109	Weighted mode	4	2.09375e-05	0.000155438	0.901378	-0.000283721	0.000325596	1.00002	0.999716	1.00033
iyC0GG	NVUC7S	Bladder cancer	VARS2_ENSG00000137411	Wald ratio	1	-3.34973e-05	0.000301195	0.911446	-0.000623839	0.000556844	0.999967	0.999376	1.00056
j2LTfT	NVUC7S	Bladder cancer	OR2L2_ENSG00000203663	Wald ratio	1	-6.99366e-05	0.00027765	0.801128	-0.000614131	0.000474258	0.99993	0.999386	1.00047
jd85XD	NVUC7S	Bladder cancer	ZNF100_ENSG00000197020	Wald ratio	1	0.000257188	0.000202546	0.204163	-0.000139801	0.000654178	1.00026	0.99986	1.00065
K4Vzmb	NVUC7S	Bladder cancer	HINT3_ENSG00000111911	Wald ratio	1	1.56349e-05	0.000477939	0.973903	-0.000921126	0.000952396	1.00002	0.999079	1.00095
k9jPLf	NVUC7S	Bladder cancer	AC124657.1_ENSG00000254532	Wald ratio	1	0.000200086	0.00024766	0.419146	-0.000285328	0.0006855	1.0002	0.999715	1.00069
kBBwcS	NVUC7S	Bladder cancer	AC006504.2_ENSG00000266977	Wald ratio	1	-0.000626124	0.000349155	0.072932	-0.00131047	5.82195e-05	0.999374	0.99869	1.00006
kEOn79	NVUC7S	Bladder cancer	SPATA7_ENSG00000042317	MR Egger	4	0.0267828	0.0361249	0.535691	-0.0440221	0.0975877	1.02714	0.956933	1.10251
kEOn79	NVUC7S	Bladder cancer	SPATA7_ENSG00000042317	Weighted median	4	-0.000123603	0.000132845	0.35215	-0.00038398	0.000136774	0.999876	0.999616	1.00014
kEOn79	NVUC7S	Bladder cancer	SPATA7_ENSG00000042317	Inverse variance weighted	4	-8.53608e-05	0.000115533	0.460002	-0.000311805	0.000141084	0.999915	0.999688	1.00014
kEOn79	NVUC7S	Bladder cancer	SPATA7_ENSG00000042317	Simple mode	4	-0.000128995	0.000179807	0.524936	-0.000481416	0.000223426	0.999871	0.999519	1.00022
kEOn79	NVUC7S	Bladder cancer	SPATA7_ENSG00000042317	Weighted mode	4	-0.000130545	0.000180283	0.521355	-0.0004839	0.000222809	0.999869	0.999516	1.00022
kFaF7B	NVUC7S	Bladder cancer	FTCD_ENSG00000160282	Wald ratio	1	-0.000118736	0.000241177	0.622493	-0.000591443	0.000353971	0.999881	0.999409	1.00035
KFBBLt	NVUC7S	Bladder cancer	AL513548.1_ENSG00000261584	Wald ratio	1	0.00013573	0.000361795	0.707545	-0.000573389	0.000844849	1.00014	0.999427	1.00085
ki3Cco	NVUC7S	Bladder cancer	SEC22A_ENSG00000121542	Wald ratio	1	-0.000360802	0.000376737	0.338213	-0.00109921	0.000377603	0.999639	0.998901	1.00038
klKdlR	NVUC7S	Bladder cancer	GATD3A_ENSG00000160221	Wald ratio	1	0.000144628	0.000216488	0.504093	-0.000279689	0.000568945	1.00014	0.99972	1.00057
kMR8WR	NVUC7S	Bladder cancer	AMH_ENSG00000104899	Wald ratio	1	0.000168491	0.000186503	0.366303	-0.000197056	0.000534038	1.00017	0.999803	1.00053
kRG76k	NVUC7S	Bladder cancer	CHRFAM7A_ENSG00000166664	Inverse variance weighted	2	0.000328305	0.00022046	0.136439	-0.000103797	0.000760408	1.00033	0.999896	1.00076
KsaCrL	NVUC7S	Bladder cancer	LAMC1_ENSG00000135862	Wald ratio	1	-4.60453e-05	0.00035887	0.897907	-0.000749431	0.000657341	0.999954	0.999251	1.00066
KSc9PD	NVUC7S	Bladder cancer	TRMT10B_ENSG00000165275	Wald ratio	1	-0.000957365	0.000813806	0.239433	-0.00255243	0.000637695	0.999043	0.997451	1.00064
kvaPbq	NVUC7S	Bladder cancer	IGFL4_ENSG00000204869	Wald ratio	1	7.84163e-05	0.000224371	0.726718	-0.00036135	0.000518183	1.00008	0.999639	1.00052
Kxyh3n	NVUC7S	Bladder cancer	PILRB_ENSG00000121716	Inverse variance weighted	2	-0.000275731	0.000196577	0.160718	-0.000661022	0.00010956	0.999724	0.999339	1.00011
KYRDOM	NVUC7S	Bladder cancer	LINC02652_ENSG00000237128	Inverse variance weighted	2	0.000289818	0.000205734	0.158924	-0.000113422	0.000693057	1.00029	0.999887	1.00069
Lbe12i	NVUC7S	Bladder cancer	U2AF1_ENSG00000160201	Wald ratio	1	5.54399e-05	0.000182922	0.76183	-0.000303087	0.000413967	1.00006	0.999697	1.00041
lbJ45Z	NVUC7S	Bladder cancer	AC104964.1_ENSG00000253641	Wald ratio	1	-0.000179416	0.000311408	0.564518	-0.000789775	0.000430944	0.999821	0.999211	1.00043
LFHncE	NVUC7S	Bladder cancer	HDHD3_ENSG00000119431	Wald ratio	1	0.000328335	0.000513625	0.52266	-0.00067837	0.00133504	1.00033	0.999322	1.00134
lhYgxF	NVUC7S	Bladder cancer	RNASEL_ENSG00000135828	Wald ratio	1	0.000228359	0.000273456	0.403669	-0.000307614	0.000764333	1.00023	0.999692	1.00076
Ljak8k	NVUC7S	Bladder cancer	FOXRED2_ENSG00000100350	Inverse variance weighted	2	0.000330947	0.000266472	0.214252	-0.000191338	0.000853232	1.00033	0.999809	1.00085
lJCf7U	NVUC7S	Bladder cancer	AC244131.2_ENSG00000275119	MR Egger	3	-0.000197148	0.00387687	0.967654	-0.00779581	0.00740151	0.999803	0.992234	1.00743
lJCf7U	NVUC7S	Bladder cancer	AC244131.2_ENSG00000275119	Weighted median	3	0.000303252	0.000141328	0.031895	2.6248e-05	0.000580255	1.0003	1.00003	1.00058
lJCf7U	NVUC7S	Bladder cancer	AC244131.2_ENSG00000275119	Inverse variance weighted	3	0.0003138	0.000120761	0.0093627	7.71083e-05	0.000550493	1.00031	1.00008	1.00055
lJCf7U	NVUC7S	Bladder cancer	AC244131.2_ENSG00000275119	Simple mode	3	0.000301553	0.000157615	0.195842	-7.37285e-06	0.00061048	1.0003	0.999993	1.00061
lJCf7U	NVUC7S	Bladder cancer	AC244131.2_ENSG00000275119	Weighted mode	3	0.000301422	0.000165332	0.209854	-2.26277e-05	0.000625472	1.0003	0.999977	1.00063
LsQeeY	NVUC7S	Bladder cancer	INPP1_ENSG00000151689	Inverse variance weighted	2	-0.000181407	0.000173243	0.295042	-0.000520963	0.000158149	0.999819	0.999479	1.00016
LUEyZn	NVUC7S	Bladder cancer	GLIPR1L2_ENSG00000180481	MR Egger	4	0.000683075	0.000508796	0.311512	-0.000314165	0.00168032	1.00068	0.999686	1.00168
LUEyZn	NVUC7S	Bladder cancer	GLIPR1L2_ENSG00000180481	Weighted median	4	0.000194964	9.60618e-05	0.0424001	6.68321e-06	0.000383245	1.00019	1.00001	1.00038
LUEyZn	NVUC7S	Bladder cancer	GLIPR1L2_ENSG00000180481	Inverse variance weighted	4	0.000160465	8.2557e-05	0.0519338	-1.34717e-06	0.000322276	1.00016	0.999999	1.00032
LUEyZn	NVUC7S	Bladder cancer	GLIPR1L2_ENSG00000180481	Simple mode	4	0.00019571	0.000133612	0.239216	-6.61707e-05	0.00045759	1.0002	0.999934	1.00046
LUEyZn	NVUC7S	Bladder cancer	GLIPR1L2_ENSG00000180481	Weighted mode	4	0.000199601	0.000111498	0.171358	-1.89345e-05	0.000418136	1.0002	0.999981	1.00042
lW8Fru	NVUC7S	Bladder cancer	THNSL2_ENSG00000144115	Wald ratio	1	-8.38342e-05	0.000283334	0.767318	-0.000639169	0.0004715	0.999916	0.999361	1.00047
lWOXav	NVUC7S	Bladder cancer	GALC_ENSG00000054983	Inverse variance weighted	2	-0.000398996	0.000248923	0.108959	-0.000886884	8.88928e-05	0.999601	0.999114	1.00009
LXwEs1	NVUC7S	Bladder cancer	MGMT_ENSG00000170430	Wald ratio	1	0.000266	0.000331133	0.4218	-0.000383021	0.000915022	1.00027	0.999617	1.00092
lyqGRT	NVUC7S	Bladder cancer	MIR4713HG_ENSG00000259240	MR Egger	3	0.000992855	0.0042098	0.852552	-0.00725835	0.00924406	1.00099	0.992768	1.00929
lyqGRT	NVUC7S	Bladder cancer	MIR4713HG_ENSG00000259240	Weighted median	3	0.000128534	0.000178337	0.471073	-0.000221007	0.000478074	1.00013	0.999779	1.00048
lyqGRT	NVUC7S	Bladder cancer	MIR4713HG_ENSG00000259240	Inverse variance weighted	3	0.000147212	0.000151937	0.332596	-0.000150585	0.000445009	1.00015	0.999849	1.00045
lyqGRT	NVUC7S	Bladder cancer	MIR4713HG_ENSG00000259240	Simple mode	3	0.000120431	0.000211046	0.625812	-0.00029322	0.000534081	1.00012	0.999707	1.00053
lyqGRT	NVUC7S	Bladder cancer	MIR4713HG_ENSG00000259240	Weighted mode	3	0.000120645	0.000197085	0.602763	-0.000265642	0.000506932	1.00012	0.999734	1.00051
M71jkw	NVUC7S	Bladder cancer	AL139352.1_ENSG00000132832	Wald ratio	1	-0.00021908	0.000280782	0.435244	-0.000769414	0.000331253	0.999781	0.999231	1.00033
mE1Idr	NVUC7S	Bladder cancer	QRSL1_ENSG00000130348	Wald ratio	1	-0.000462857	0.000339007	0.172149	-0.00112731	0.000201597	0.999537	0.998873	1.0002
miVzp0	NVUC7S	Bladder cancer	AC090124.1_ENSG00000254530	Inverse variance weighted	2	0.000194193	0.000142841	0.173986	-8.57747e-05	0.00047416	1.00019	0.999914	1.00047
mkbFo9	NVUC7S	Bladder cancer	MKNK1_ENSG00000079277	Wald ratio	1	-0.000399065	0.00041998	0.34201	-0.00122223	0.000424095	0.999601	0.998779	1.00042
mlA03F	NVUC7S	Bladder cancer	LINC01535_ENSG00000226686	MR Egger	5	0.000336559	0.00228641	0.89231	-0.00414481	0.00481793	1.00034	0.995864	1.00483
mlA03F	NVUC7S	Bladder cancer	LINC01535_ENSG00000226686	Weighted median	5	-4.15097e-05	0.00017367	0.811094	-0.000381902	0.000298883	0.999958	0.999618	1.0003
mlA03F	NVUC7S	Bladder cancer	LINC01535_ENSG00000226686	Inverse variance weighted	5	-2.47583e-05	0.00014366	0.86317	-0.000306331	0.000256814	0.999975	0.999694	1.00026
mlA03F	NVUC7S	Bladder cancer	LINC01535_ENSG00000226686	Simple mode	5	-4.37704e-05	0.000226739	0.856331	-0.000488178	0.000400637	0.999956	0.999512	1.0004
mlA03F	NVUC7S	Bladder cancer	LINC01535_ENSG00000226686	Weighted mode	5	-4.37704e-05	0.000209682	0.844846	-0.000454748	0.000367207	0.999956	0.999545	1.00037
Mlahdt	NVUC7S	Bladder cancer	TCEA3_ENSG00000204219	Wald ratio	1	-0.00013085	0.000239632	0.585035	-0.000600529	0.000338829	0.999869	0.9994	1.00034
moO7y9	NVUC7S	Bladder cancer	NPIPA5_ENSG00000183793	Wald ratio	1	-9.12767e-05	0.000227608	0.688401	-0.000537388	0.000354834	0.999909	0.999463	1.00035
Mp0pjA	NVUC7S	Bladder cancer	NAPG_ENSG00000134265	Wald ratio	1	-0.000717349	0.000424639	0.0911586	-0.00154964	0.000114942	0.999283	0.998452	1.00011
mRDdVQ	NVUC7S	Bladder cancer	TRMT9B_ENSG00000250305	Wald ratio	1	0.000749407	0.00039495	0.0577653	-2.46944e-05	0.00152351	1.00075	0.999975	1.00152
mtUSXQ	NVUC7S	Bladder cancer	MVB12B_ENSG00000196814	Wald ratio	1	-0.000376709	0.000366269	0.303713	-0.0010946	0.000341179	0.999623	0.998906	1.00034
MuIYiy	NVUC7S	Bladder cancer	LRRC37A_ENSG00000176681	Inverse variance weighted	2	0.000314155	0.000186945	0.0928664	-5.22572e-05	0.000680567	1.00031	0.999948	1.00068
N10e5C	NVUC7S	Bladder cancer	FAM153A_ENSG00000170074	Inverse variance weighted	2	0.00029546	0.000132588	0.0258538	3.55868e-05	0.000555333	1.0003	1.00004	1.00056
N4welu	NVUC7S	Bladder cancer	COL28A1_ENSG00000215018	Wald ratio	1	0.00065018	0.000335413	0.0525685	-7.22866e-06	0.00130759	1.00065	0.999993	1.00131
nF0akq	NVUC7S	Bladder cancer	DEAF1_ENSG00000177030	Wald ratio	1	0.000533789	0.000368094	0.147018	-0.000187674	0.00125525	1.00053	0.999812	1.00126
NM6Kje	NVUC7S	Bladder cancer	PPFIBP1_ENSG00000110841	Wald ratio	1	-0.000817744	0.000553126	0.1393	-0.00190187	0.000266383	0.999183	0.9981	1.00027
nMbDuT	NVUC7S	Bladder cancer	CCDC57_ENSG00000176155	Wald ratio	1	0.000177497	0.000536796	0.740901	-0.000874623	0.00122962	1.00018	0.999126	1.00123
noOkAS	NVUC7S	Bladder cancer	LINC02210-CRHR1_ENSG00000263715	MR Egger	6	0.00114403	0.00320688	0.739308	-0.00514146	0.00742952	1.00114	0.994872	1.00746
noOkAS	NVUC7S	Bladder cancer	LINC02210-CRHR1_ENSG00000263715	Weighted median	6	0.000139832	0.000169295	0.408824	-0.000191986	0.00047165	1.00014	0.999808	1.00047
noOkAS	NVUC7S	Bladder cancer	LINC02210-CRHR1_ENSG00000263715	Inverse variance weighted	6	0.000144456	0.000145479	0.320725	-0.000140683	0.000429596	1.00014	0.999859	1.00043
noOkAS	NVUC7S	Bladder cancer	LINC02210-CRHR1_ENSG00000263715	Simple mode	6	0.000133846	0.000248278	0.612948	-0.000352779	0.000620471	1.00013	0.999647	1.00062
noOkAS	NVUC7S	Bladder cancer	LINC02210-CRHR1_ENSG00000263715	Weighted mode	6	0.000130904	0.000249073	0.621657	-0.00035728	0.000619088	1.00013	0.999643	1.00062
NrCpIV	NVUC7S	Bladder cancer	MMP26_ENSG00000167346	Wald ratio	1	2.02269e-05	0.000189037	0.914789	-0.000350287	0.00039074	1.00002	0.99965	1.00039
nsHOmp	NVUC7S	Bladder cancer	PWP2_ENSG00000241945	Wald ratio	1	-1.59635e-05	0.000162364	0.921679	-0.000334196	0.000302269	0.999984	0.999666	1.0003
NsNhjH	NVUC7S	Bladder cancer	LINC01891_ENSG00000231682	Wald ratio	1	5.71051e-05	0.000320989	0.858799	-0.000572033	0.000686244	1.00006	0.999428	1.00069
Nw4LiD	NVUC7S	Bladder cancer	CHAF1A_ENSG00000167670	Wald ratio	1	-0.000187302	0.000259747	0.470851	-0.000696406	0.000321802	0.999813	0.999304	1.00032
nxDeKX	NVUC7S	Bladder cancer	FAM182B_ENSG00000175170	MR Egger	7	0.000213834	0.00081364	0.803182	-0.0013809	0.00180857	1.00021	0.99862	1.00181
nxDeKX	NVUC7S	Bladder cancer	FAM182B_ENSG00000175170	Weighted median	7	-4.36224e-05	7.70045e-05	0.571059	-0.000194551	0.000107306	0.999956	0.999805	1.00011
nxDeKX	NVUC7S	Bladder cancer	FAM182B_ENSG00000175170	Inverse variance weighted	7	-3.2071e-05	6.33419e-05	0.612636	-0.000156221	9.20792e-05	0.999968	0.999844	1.00009
nxDeKX	NVUC7S	Bladder cancer	FAM182B_ENSG00000175170	Simple mode	7	-6.73143e-05	0.000106796	0.551727	-0.000276634	0.000142005	0.999933	0.999723	1.00014
nxDeKX	NVUC7S	Bladder cancer	FAM182B_ENSG00000175170	Weighted mode	7	-5.80943e-05	0.000106592	0.605393	-0.000267014	0.000150826	0.999942	0.999733	1.00015
O7IH0j	NVUC7S	Bladder cancer	AC004053.1_ENSG00000248242	Wald ratio	1	-0.000215068	0.000390737	0.582035	-0.000980913	0.000550777	0.999785	0.99902	1.00055
oaNHMj	NVUC7S	Bladder cancer	TRPV2_ENSG00000187688	Wald ratio	1	0.000148708	0.000237339	0.530946	-0.000316477	0.000613893	1.00015	0.999684	1.00061
OGuTLx	NVUC7S	Bladder cancer	HLA-DMA_ENSG00000204257	MR Egger	4	0.000231199	0.00046204	0.666437	-0.000674399	0.0011368	1.00023	0.999326	1.00114
OGuTLx	NVUC7S	Bladder cancer	HLA-DMA_ENSG00000204257	Weighted median	4	0.000130809	0.000129427	0.312171	-0.000122868	0.000384486	1.00013	0.999877	1.00038
OGuTLx	NVUC7S	Bladder cancer	HLA-DMA_ENSG00000204257	Inverse variance weighted	4	0.000141641	0.000118951	0.23375	-9.15024e-05	0.000374785	1.00014	0.999909	1.00037
OGuTLx	NVUC7S	Bladder cancer	HLA-DMA_ENSG00000204257	Simple mode	4	0.000184198	0.000166038	0.348202	-0.000141236	0.000509632	1.00018	0.999859	1.00051
OGuTLx	NVUC7S	Bladder cancer	HLA-DMA_ENSG00000204257	Weighted mode	4	0.00010046	0.000164908	0.585434	-0.000222759	0.000423679	1.0001	0.999777	1.00042
OHbPml	NVUC7S	Bladder cancer	OR2L5_ENSG00000197454	Wald ratio	1	-5.28256e-05	0.000233298	0.820867	-0.000510089	0.000404438	0.999947	0.99949	1.0004
oHi2PZ	NVUC7S	Bladder cancer	MGRN1_ENSG00000102858	Wald ratio	1	8.13491e-05	0.000327267	0.803692	-0.000560093	0.000722792	1.00008	0.99944	1.00072
oLpa1W	NVUC7S	Bladder cancer	SMCO4_ENSG00000166002	Wald ratio	1	0.000135113	0.000349965	0.69944	-0.000550817	0.000821044	1.00014	0.999449	1.00082
OMiqof	NVUC7S	Bladder cancer	HSD17B4_ENSG00000133835	Wald ratio	1	0.000380947	0.000460015	0.407604	-0.000520684	0.00128258	1.00038	0.999479	1.00128
oq639z	NVUC7S	Bladder cancer	LINC00665_ENSG00000232677	Wald ratio	1	3.56677e-05	0.00032453	0.912484	-0.000600411	0.000671746	1.00004	0.9994	1.00067
OTWGEd	NVUC7S	Bladder cancer	TRIM69_ENSG00000185880	Wald ratio	1	0.000142004	0.000279192	0.611015	-0.000405212	0.000689221	1.00014	0.999595	1.00069
OuFeNr	NVUC7S	Bladder cancer	CWF19L1_ENSG00000095485	Wald ratio	1	0.000308807	0.000267558	0.24843	-0.000215606	0.000833221	1.00031	0.999784	1.00083
OYOZIU	NVUC7S	Bladder cancer	ALG1L_ENSG00000189366	Wald ratio	1	0.000137799	0.000282038	0.625136	-0.000414995	0.000690593	1.00014	0.999585	1.00069
oyqLEo	NVUC7S	Bladder cancer	WWOX_ENSG00000186153	Wald ratio	1	-2.46832e-05	0.000326959	0.939822	-0.000665523	0.000616157	0.999975	0.999335	1.00062
P830pt	NVUC7S	Bladder cancer	DNALI1_ENSG00000163879	Inverse variance weighted	2	-0.000215981	0.00021923	0.324536	-0.000645673	0.00021371	0.999784	0.999355	1.00021
pA31B5	NVUC7S	Bladder cancer	ECI2_ENSG00000198721	Wald ratio	1	-0.000138348	0.000293216	0.63705	-0.000713052	0.000436356	0.999862	0.999287	1.00044
PbWGC6	NVUC7S	Bladder cancer	PPM1K-DT_ENSG00000246375	Wald ratio	1	-7.23137e-05	0.000220508	0.742956	-0.00050451	0.000359882	0.999928	0.999496	1.00036
Pc8Tey	NVUC7S	Bladder cancer	KNSTRN_ENSG00000128944	Wald ratio	1	4.38683e-05	0.000220962	0.842628	-0.000389218	0.000476954	1.00004	0.999611	1.00048
PD7STz	NVUC7S	Bladder cancer	ZNF235_ENSG00000159917	Wald ratio	1	0.000200059	0.00036566	0.584298	-0.000516635	0.000916753	1.0002	0.999483	1.00092
pHlxDa	NVUC7S	Bladder cancer	ITGB3BP_ENSG00000142856	Wald ratio	1	-0.00010116	0.000175698	0.564776	-0.000445527	0.000243207	0.999899	0.999555	1.00024
pIXSqf	NVUC7S	Bladder cancer	RFC4_ENSG00000163918	Wald ratio	1	7.11575e-05	0.000330465	0.829514	-0.000576555	0.00071887	1.00007	0.999424	1.00072
Plpfe1	NVUC7S	Bladder cancer	TDRD5_ENSG00000162782	Inverse variance weighted	2	-0.000153242	0.000192504	0.426004	-0.00053055	0.000224066	0.999847	0.99947	1.00022
PSz0Al	NVUC7S	Bladder cancer	L2HGDH_ENSG00000087299	Wald ratio	1	3.26859e-05	0.000346658	0.92488	-0.000646763	0.000712135	1.00003	0.999353	1.00071
PvqTp4	NVUC7S	Bladder cancer	IL17RC_ENSG00000163702	Wald ratio	1	-0.00018451	0.000343615	0.59129	-0.000857995	0.000488975	0.999816	0.999142	1.00049
PVS7Fp	NVUC7S	Bladder cancer	CFAP410_ENSG00000160226	Wald ratio	1	-6.68297e-05	0.000376335	0.859053	-0.000804447	0.000670788	0.999933	0.999196	1.00067
Px5usy	NVUC7S	Bladder cancer	AL031599.1_ENSG00000224228	Wald ratio	1	0.000111551	0.000330571	0.735777	-0.000536367	0.000759469	1.00011	0.999464	1.00076
PzyT88	NVUC7S	Bladder cancer	PILRA_ENSG00000085514	Wald ratio	1	-0.000465058	0.000438565	0.288959	-0.00132465	0.00039453	0.999535	0.998676	1.00039
QcOp4R	NVUC7S	Bladder cancer	LDHAL6A_ENSG00000166800	Wald ratio	1	-0.000244233	0.000298408	0.413098	-0.000829112	0.000340646	0.999756	0.999171	1.00034
qGAOL1	NVUC7S	Bladder cancer	TAMM41_ENSG00000144559	Wald ratio	1	9.4984e-05	0.000332321	0.775016	-0.000556365	0.000746334	1.00009	0.999444	1.00075
qhB5U9	NVUC7S	Bladder cancer	ARSB_ENSG00000113273	Wald ratio	1	1.81257e-05	0.000381738	0.962129	-0.000730081	0.000766332	1.00002	0.99927	1.00077
QIOeE4	NVUC7S	Bladder cancer	AC008758.6_ENSG00000269755	Wald ratio	1	0.000174309	0.000296856	0.557081	-0.00040753	0.000756148	1.00017	0.999593	1.00076
QIPm5L	NVUC7S	Bladder cancer	MPPE1_ENSG00000154889	Wald ratio	1	-0.000305046	0.00027923	0.274635	-0.000852337	0.000242246	0.999695	0.999148	1.00024
qjplI4	NVUC7S	Bladder cancer	AL590705.1_ENSG00000203279	Wald ratio	1	-8.27617e-05	0.000216392	0.702119	-0.000506891	0.000341367	0.999917	0.999493	1.00034
QM7WVv	NVUC7S	Bladder cancer	C12orf60_ENSG00000182993	Wald ratio	1	0.000375893	0.000273203	0.168861	-0.000159585	0.000911372	1.00038	0.99984	1.00091
Qmjziz	NVUC7S	Bladder cancer	LHFPL2_ENSG00000145685	Wald ratio	1	0.000231651	0.000243689	0.341807	-0.00024598	0.000709282	1.00023	0.999754	1.00071
qn4s9e	NVUC7S	Bladder cancer	AC003005.2_ENSG00000268266	Wald ratio	1	0.000157083	0.000320776	0.624349	-0.000471638	0.000785803	1.00016	0.999528	1.00079
QNgSTq	NVUC7S	Bladder cancer	PARVA_ENSG00000197702	Wald ratio	1	-0.000120008	0.000265706	0.651517	-0.000640791	0.000400776	0.99988	0.999359	1.0004
qtLzNm	NVUC7S	Bladder cancer	ANO5_ENSG00000171714	Wald ratio	1	0.00114821	0.000621174	0.0645381	-6.92954e-05	0.00236571	1.00115	0.999931	1.00237
qtRv50	NVUC7S	Bladder cancer	NSUN2_ENSG00000037474	Wald ratio	1	6.19382e-05	0.00018481	0.737516	-0.00030029	0.000424167	1.00006	0.9997	1.00042
QukvOv	NVUC7S	Bladder cancer	TM2D3_ENSG00000184277	Wald ratio	1	-0.00025762	0.000708676	0.716214	-0.00164662	0.00113138	0.999742	0.998355	1.00113
QV5x3G	NVUC7S	Bladder cancer	ZNF589_ENSG00000164048	Inverse variance weighted	2	0.000262787	0.000258204	0.308798	-0.000243294	0.000768867	1.00026	0.999757	1.00077
rdkjBA	NVUC7S	Bladder cancer	AC110285.2_ENSG00000262877	Wald ratio	1	-0.000136151	0.000234147	0.560921	-0.00059508	0.000322778	0.999864	0.999405	1.00032
Rj80cw	NVUC7S	Bladder cancer	CYB561_ENSG00000008283	MR Egger	3	-5.71056e-05	0.00278993	0.986971	-0.00552537	0.00541116	0.999943	0.99449	1.00543
Rj80cw	NVUC7S	Bladder cancer	CYB561_ENSG00000008283	Weighted median	3	8.26752e-05	8.39701e-05	0.324831	-8.19062e-05	0.000247257	1.00008	0.999918	1.00025
Rj80cw	NVUC7S	Bladder cancer	CYB561_ENSG00000008283	Inverse variance weighted	3	7.54828e-05	7.50148e-05	0.314301	-7.15463e-05	0.000222512	1.00008	0.999928	1.00022
Rj80cw	NVUC7S	Bladder cancer	CYB561_ENSG00000008283	Simple mode	3	8.90703e-05	0.000102344	0.475895	-0.000111524	0.000289665	1.00009	0.999888	1.00029
Rj80cw	NVUC7S	Bladder cancer	CYB561_ENSG00000008283	Weighted mode	3	8.96282e-05	0.000106652	0.489151	-0.00011941	0.000298666	1.00009	0.999881	1.0003
rVQhjA	NVUC7S	Bladder cancer	CAMLG_ENSG00000164615	MR Egger	3	0.0013711	0.00558898	0.846847	-0.00958329	0.0123255	1.00137	0.990462	1.0124
rVQhjA	NVUC7S	Bladder cancer	CAMLG_ENSG00000164615	Weighted median	3	0.000153241	0.000286987	0.593365	-0.000409253	0.000715735	1.00015	0.999591	1.00072
rVQhjA	NVUC7S	Bladder cancer	CAMLG_ENSG00000164615	Inverse variance weighted	3	7.7968e-05	0.000256586	0.76123	-0.000424941	0.000580877	1.00008	0.999575	1.00058
rVQhjA	NVUC7S	Bladder cancer	CAMLG_ENSG00000164615	Simple mode	3	0.000177944	0.000356225	0.666946	-0.000520257	0.000876146	1.00018	0.99948	1.00088
rVQhjA	NVUC7S	Bladder cancer	CAMLG_ENSG00000164615	Weighted mode	3	0.000176893	0.00035726	0.669553	-0.000523336	0.000877122	1.00018	0.999477	1.00088
RZ0Xjz	NVUC7S	Bladder cancer	MICU1_ENSG00000107745	Wald ratio	1	-0.000264948	0.000391469	0.49853	-0.00103223	0.000502331	0.999735	0.998968	1.0005
s16K7R	NVUC7S	Bladder cancer	GSAP_ENSG00000186088	Wald ratio	1	0.000390571	0.000324946	0.229382	-0.000246325	0.00102747	1.00039	0.999754	1.00103
s47MmS	NVUC7S	Bladder cancer	C3orf20_ENSG00000131379	Wald ratio	1	-9.4132e-05	0.000191063	0.622242	-0.000468616	0.000280352	0.999906	0.999531	1.00028
S4BMth	NVUC7S	Bladder cancer	AC159540.2_ENSG00000277701	Inverse variance weighted	2	-0.000568434	0.000315047	0.0711868	-0.00118593	4.90579e-05	0.999432	0.998815	1.00005
sKMlLs	NVUC7S	Bladder cancer	C2orf80_ENSG00000188674	Wald ratio	1	-0.000224573	0.000449816	0.6176	-0.00110621	0.000657067	0.999775	0.998894	1.00066
sKtzID	NVUC7S	Bladder cancer	DNAH7_ENSG00000118997	Wald ratio	1	0.000479651	0.000323698	0.138398	-0.000154798	0.0011141	1.00048	0.999845	1.00111
slxDZ5	NVUC7S	Bladder cancer	VPS53_ENSG00000141252	Wald ratio	1	2.04346e-05	0.0005424	0.969947	-0.00104267	0.00108354	1.00002	0.998958	1.00108
snp9W2	NVUC7S	Bladder cancer	DHFR2_ENSG00000178700	Wald ratio	1	0.000364989	0.000300092	0.223886	-0.00022319	0.000953169	1.00037	0.999777	1.00095
SPrp1O	NVUC7S	Bladder cancer	IFT88_ENSG00000032742	Inverse variance weighted	2	0.000280755	0.000186284	0.131778	-8.43628e-05	0.000645872	1.00028	0.999916	1.00065
SRFTfo	NVUC7S	Bladder cancer	ARHGAP42_ENSG00000165895	Wald ratio	1	9.58273e-05	0.000258838	0.711218	-0.000411495	0.00060315	1.0001	0.999589	1.0006
SssSOK	NVUC7S	Bladder cancer	MXRA7_ENSG00000182534	Wald ratio	1	-0.000261834	0.000513898	0.610398	-0.00126907	0.000745406	0.999738	0.998732	1.00075
SwoA1L	NVUC7S	Bladder cancer	TRAF3_ENSG00000131323	Wald ratio	1	-0.000344633	0.000376426	0.359908	-0.00108243	0.000393162	0.999655	0.998918	1.00039
sydFje	NVUC7S	Bladder cancer	MTERF4_ENSG00000122085	Wald ratio	1	0.000367905	0.000415493	0.375905	-0.000446461	0.00118227	1.00037	0.999554	1.00118
t95iM4	NVUC7S	Bladder cancer	EFCAB5_ENSG00000176927	Wald ratio	1	-0.000101155	0.000349029	0.771955	-0.000785252	0.000582941	0.999899	0.999215	1.00058
TaK38N	NVUC7S	Bladder cancer	AL591441.1_ENSG00000276128	Wald ratio	1	0.000324502	0.000218449	0.137416	-0.000103658	0.000752663	1.00032	0.999896	1.00075
TBK5ZO	NVUC7S	Bladder cancer	FAM66A_ENSG00000227888	Wald ratio	1	0.000129679	0.000253987	0.609649	-0.000368135	0.000627494	1.00013	0.999632	1.00063
tEvwM4	NVUC7S	Bladder cancer	XKR9_ENSG00000221947	MR Egger	6	-0.000217877	0.00133383	0.878166	-0.00283219	0.00239643	0.999782	0.997172	1.0024
tEvwM4	NVUC7S	Bladder cancer	XKR9_ENSG00000221947	Weighted median	6	-0.000228917	9.12832e-05	0.0121496	-0.000407832	-5.00021e-05	0.999771	0.999592	0.99995
tEvwM4	NVUC7S	Bladder cancer	XKR9_ENSG00000221947	Inverse variance weighted	6	-0.00022706	7.92319e-05	0.00416004	-0.000382354	-7.17654e-05	0.999773	0.999618	0.999928
tEvwM4	NVUC7S	Bladder cancer	XKR9_ENSG00000221947	Simple mode	6	-0.000243002	0.000118838	0.0962764	-0.000475924	-1.00793e-05	0.999757	0.999524	0.99999
tEvwM4	NVUC7S	Bladder cancer	XKR9_ENSG00000221947	Weighted mode	6	-0.000238477	0.00011726	0.0976434	-0.000468306	-8.6478e-06	0.999762	0.999532	0.999991
tHjkQb	NVUC7S	Bladder cancer	APIP_ENSG00000149089	Inverse variance weighted	2	-0.000266273	0.000144185	0.0647838	-0.000548875	1.63294e-05	0.999734	0.999451	1.00002
tIzvJX	NVUC7S	Bladder cancer	ANKRD36B_ENSG00000196912	MR Egger	8	-0.000382836	0.000695325	0.601799	-0.00174567	0.000980001	0.999617	0.998256	1.00098
tIzvJX	NVUC7S	Bladder cancer	ANKRD36B_ENSG00000196912	Weighted median	8	-0.000308976	0.000102531	0.00258273	-0.000509937	-0.000108014	0.999691	0.99949	0.999892
tIzvJX	NVUC7S	Bladder cancer	ANKRD36B_ENSG00000196912	Inverse variance weighted	8	-0.00031168	8.37722e-05	0.000198774	-0.000475874	-0.000147487	0.999688	0.999524	0.999853
tIzvJX	NVUC7S	Bladder cancer	ANKRD36B_ENSG00000196912	Simple mode	8	-0.000287868	0.000145569	0.0885034	-0.000573184	-2.55193e-06	0.999712	0.999427	0.999997
tIzvJX	NVUC7S	Bladder cancer	ANKRD36B_ENSG00000196912	Weighted mode	8	-0.000290135	0.00013216	0.0641722	-0.000549169	-3.11008e-05	0.99971	0.999451	0.999969
TmrQ9r	NVUC7S	Bladder cancer	THEM4_ENSG00000159445	Wald ratio	1	-8.13341e-05	0.000427758	0.849199	-0.000919739	0.000757071	0.999919	0.999081	1.00076
Tp2HNG	NVUC7S	Bladder cancer	PCM1_ENSG00000078674	Inverse variance weighted	2	0.000218865	0.000137226	0.110728	-5.00973e-05	0.000487828	1.00022	0.99995	1.00049
TqQqAP	NVUC7S	Bladder cancer	AC096887.1_ENSG00000272305	Inverse variance weighted	2	5.65001e-05	0.000214111	0.79187	-0.000363157	0.000476157	1.00006	0.999637	1.00048
Tvj4LQ	NVUC7S	Bladder cancer	AC008467.1_ENSG00000249476	Wald ratio	1	0.000400215	0.000257096	0.119548	-0.000103693	0.000904122	1.0004	0.999896	1.0009
u1bAiO	NVUC7S	Bladder cancer	AC011462.2_ENSG00000255730	Wald ratio	1	-0.000138554	0.000296774	0.640596	-0.000720232	0.000443124	0.999861	0.99928	1.00044
U7BiRU	NVUC7S	Bladder cancer	SESTD1_ENSG00000187231	Wald ratio	1	-0.000301298	0.000405055	0.456971	-0.0010952	0.00049261	0.999699	0.998905	1.00049
U7iDxh	NVUC7S	Bladder cancer	FKRP_ENSG00000181027	Wald ratio	1	-0.000445624	0.000381642	0.242949	-0.00119364	0.000302395	0.999554	0.998807	1.0003
UaHBZu	NVUC7S	Bladder cancer	ANKDD1A_ENSG00000166839	Wald ratio	1	0.000171071	0.000312048	0.583539	-0.000440542	0.000782685	1.00017	0.99956	1.00078
UaYBmm	NVUC7S	Bladder cancer	AP000350.6_ENSG00000273295	Wald ratio	1	0.000194849	0.000164659	0.236671	-0.000127882	0.00051758	1.00019	0.999872	1.00052
UcIYmj	NVUC7S	Bladder cancer	AL512625.3_ENSG00000234665	Wald ratio	1	-7.33482e-05	0.000403553	0.855774	-0.000864312	0.000717615	0.999927	0.999136	1.00072
ud9bZj	NVUC7S	Bladder cancer	HBS1L_ENSG00000112339	Inverse variance weighted	2	-6.52435e-05	0.000279389	0.815356	-0.000612845	0.000482358	0.999935	0.999387	1.00048
UfWT5p	NVUC7S	Bladder cancer	CABCOCO1_ENSG00000183346	Wald ratio	1	-0.000125998	0.0001982	0.524965	-0.000514469	0.000262473	0.999874	0.999486	1.00026
UjoaJl	NVUC7S	Bladder cancer	HFM1_ENSG00000162669	Wald ratio	1	0.000602443	0.000334894	0.0720336	-5.39496e-05	0.00125884	1.0006	0.999946	1.00126
UMwjuX	NVUC7S	Bladder cancer	MFAP3_ENSG00000037749	Inverse variance weighted	2	-0.000315523	0.000221717	0.15471	-0.000750089	0.000119042	0.999685	0.99925	1.00012
UUdAyf	NVUC7S	Bladder cancer	LPIN1_ENSG00000134324	Wald ratio	1	-0.000591037	0.000366527	0.106846	-0.00130943	0.000127355	0.999409	0.998691	1.00013
UwRsuw	NVUC7S	Bladder cancer	ALDH8A1_ENSG00000118514	Inverse variance weighted	2	4.39828e-06	0.000189585	0.981491	-0.000367188	0.000375985	1	0.999633	1.00038
v0sjj4	NVUC7S	Bladder cancer	AC023790.2_ENSG00000255621	Wald ratio	1	0.000402395	0.000321478	0.210678	-0.000227701	0.00103249	1.0004	0.999772	1.00103
v1GDhP	NVUC7S	Bladder cancer	ASAP3_ENSG00000088280	Wald ratio	1	-0.000272741	0.000287026	0.341996	-0.000835312	0.000289831	0.999727	0.999165	1.00029
V3DA1r	NVUC7S	Bladder cancer	WDR97_ENSG00000179698	Inverse variance weighted	2	-0.000125245	0.000171256	0.464576	-0.000460908	0.000210417	0.999875	0.999539	1.00021
v6vDlf	NVUC7S	Bladder cancer	PTPN12_ENSG00000127947	MR Egger	3	-0.00173593	0.00308422	0.673638	-0.00778101	0.00430915	0.998266	0.992249	1.00432
v6vDlf	NVUC7S	Bladder cancer	PTPN12_ENSG00000127947	Weighted median	3	-3.33392e-05	0.000164592	0.839482	-0.00035594	0.000289262	0.999967	0.999644	1.00029
v6vDlf	NVUC7S	Bladder cancer	PTPN12_ENSG00000127947	Inverse variance weighted	3	-4.5756e-05	0.000137951	0.740128	-0.00031614	0.000224628	0.999954	0.999684	1.00022
v6vDlf	NVUC7S	Bladder cancer	PTPN12_ENSG00000127947	Simple mode	3	2.01651e-06	0.000188858	0.99245	-0.000368145	0.000372178	1	0.999632	1.00037
v6vDlf	NVUC7S	Bladder cancer	PTPN12_ENSG00000127947	Weighted mode	3	-7.52129e-06	0.000193343	0.972503	-0.000386473	0.00037143	0.999992	0.999614	1.00037
VF8p0p	NVUC7S	Bladder cancer	SRR_ENSG00000167720	Inverse variance weighted	2	0.00020718	0.000236709	0.381437	-0.00025677	0.00067113	1.00021	0.999743	1.00067
vFija8	NVUC7S	Bladder cancer	MAP1LC3A_ENSG00000101460	MR Egger	4	0.00200399	0.0121606	0.884256	-0.0218307	0.0258387	1.00201	0.978406	1.02618
vFija8	NVUC7S	Bladder cancer	MAP1LC3A_ENSG00000101460	Weighted median	4	-0.000639778	0.000405366	0.114504	-0.0014343	0.00015474	0.99936	0.998567	1.00015
vFija8	NVUC7S	Bladder cancer	MAP1LC3A_ENSG00000101460	Inverse variance weighted	4	-0.000511654	0.000351804	0.145843	-0.00120119	0.000177882	0.999488	0.9988	1.00018
vFija8	NVUC7S	Bladder cancer	MAP1LC3A_ENSG00000101460	Simple mode	4	-0.000806554	0.000586063	0.262488	-0.00195524	0.000342129	0.999194	0.998047	1.00034
vFija8	NVUC7S	Bladder cancer	MAP1LC3A_ENSG00000101460	Weighted mode	4	-0.00081642	0.000607407	0.271521	-0.00200694	0.000374097	0.999184	0.997995	1.00037
VgqmYH	NVUC7S	Bladder cancer	AC006504.5_ENSG00000267575	MR Egger	5	-0.000654532	0.00125277	0.637472	-0.00310996	0.00180089	0.999346	0.996895	1.0018
VgqmYH	NVUC7S	Bladder cancer	AC006504.5_ENSG00000267575	Weighted median	5	-0.000217028	0.000114713	0.0585015	-0.000441865	7.80956e-06	0.999783	0.999558	1.00001
VgqmYH	NVUC7S	Bladder cancer	AC006504.5_ENSG00000267575	Inverse variance weighted	5	-0.000208887	9.52576e-05	0.0283171	-0.000395592	-2.21822e-05	0.999791	0.999604	0.999978
VgqmYH	NVUC7S	Bladder cancer	AC006504.5_ENSG00000267575	Simple mode	5	-0.000226765	0.000145327	0.193689	-0.000511606	5.80762e-05	0.999773	0.999489	1.00006
VgqmYH	NVUC7S	Bladder cancer	AC006504.5_ENSG00000267575	Weighted mode	5	-0.000226765	0.000143915	0.190223	-0.000508839	5.53089e-05	0.999773	0.999491	1.00006
VPkf25	NVUC7S	Bladder cancer	COG1_ENSG00000166685	Wald ratio	1	0.00044721	0.000461988	0.333038	-0.000458287	0.00135271	1.00045	0.999542	1.00135
VUtuS7	NVUC7S	Bladder cancer	GAA_ENSG00000171298	Wald ratio	1	0.000256213	0.000297403	0.388963	-0.000326698	0.000839123	1.00026	0.999673	1.00084
vYYJ1z	NVUC7S	Bladder cancer	AC021752.1_ENSG00000273674	Wald ratio	1	-0.00019176	0.000360809	0.595092	-0.000898946	0.000515427	0.999808	0.999101	1.00052
Vz50ap	NVUC7S	Bladder cancer	SUSD1_ENSG00000106868	Inverse variance weighted	2	0.000155678	0.00031555	0.621763	-0.000462801	0.000774156	1.00016	0.999537	1.00077
vzknmz	NVUC7S	Bladder cancer	AC005697.1_ENSG00000266202	Wald ratio	1	0.000285299	0.000391593	0.466271	-0.000482223	0.00105282	1.00029	0.999518	1.00105
VzTLCp	NVUC7S	Bladder cancer	TMEM50B_ENSG00000142188	Wald ratio	1	0.00013639	0.000375279	0.716278	-0.000599157	0.000871938	1.00014	0.999401	1.00087
VZuAfw	NVUC7S	Bladder cancer	KCNT1_ENSG00000107147	Wald ratio	1	-0.000138761	0.000379632	0.714729	-0.00088284	0.000605319	0.999861	0.999118	1.00061
w2R77A	NVUC7S	Bladder cancer	SCFD1_ENSG00000092108	Inverse variance weighted	2	4.7589e-05	0.000262651	0.856221	-0.000467206	0.000562384	1.00005	0.999533	1.00056
w3Jv7H	NVUC7S	Bladder cancer	GSTO2_ENSG00000065621	Wald ratio	1	-9.29015e-05	0.000191496	0.627581	-0.000468234	0.000282431	0.999907	0.999532	1.00028
W51y10	NVUC7S	Bladder cancer	TSGA10_ENSG00000135951	Inverse variance weighted	2	-3.07943e-05	0.000209434	0.883103	-0.000441285	0.000379696	0.999969	0.999559	1.00038
W9R19g	NVUC7S	Bladder cancer	ZNF738_ENSG00000172687	Inverse variance weighted	2	-0.000259111	0.000248998	0.298054	-0.000747147	0.000228924	0.999741	0.999253	1.00023
WEWxaj	NVUC7S	Bladder cancer	LINC01876_ENSG00000226383	Wald ratio	1	0.000350883	0.000267704	0.189954	-0.000173816	0.000875582	1.00035	0.999826	1.00088
WfFoxu	NVUC7S	Bladder cancer	CEP128_ENSG00000100629	Inverse variance weighted	2	-6.12753e-05	0.000246357	0.803573	-0.000544134	0.000421584	0.999939	0.999456	1.00042
WKmgpZ	NVUC7S	Bladder cancer	POLE2_ENSG00000100479	Inverse variance weighted	2	-0.00041477	0.000298866	0.165194	-0.00100055	0.000171007	0.999585	0.999	1.00017
WkTlZN	NVUC7S	Bladder cancer	SERINC5_ENSG00000164300	Wald ratio	1	-4.7808e-05	0.000513379	0.925805	-0.00105403	0.000958416	0.999952	0.998947	1.00096
wlCsbL	NVUC7S	Bladder cancer	LINC02018_ENSG00000272690	Wald ratio	1	5.17998e-05	0.000330927	0.875616	-0.000596817	0.000700416	1.00005	0.999403	1.0007
wNATab	NVUC7S	Bladder cancer	KANSL1_ENSG00000120071	MR Egger	8	-0.000387174	0.000810773	0.649878	-0.00197629	0.00120194	0.999613	0.998026	1.0012
wNATab	NVUC7S	Bladder cancer	KANSL1_ENSG00000120071	Weighted median	8	6.53418e-05	5.83085e-05	0.262449	-4.89428e-05	0.000179626	1.00007	0.999951	1.00018
wNATab	NVUC7S	Bladder cancer	KANSL1_ENSG00000120071	Inverse variance weighted	8	7.19213e-05	4.93123e-05	0.144706	-2.47308e-05	0.000168573	1.00007	0.999975	1.00017
wNATab	NVUC7S	Bladder cancer	KANSL1_ENSG00000120071	Simple mode	8	6.46362e-05	9.03588e-05	0.497565	-0.000112467	0.000241739	1.00006	0.999888	1.00024
wNATab	NVUC7S	Bladder cancer	KANSL1_ENSG00000120071	Weighted mode	8	6.46362e-05	8.07441e-05	0.449728	-9.36222e-05	0.000222895	1.00006	0.999906	1.00022
WpCjJK	NVUC7S	Bladder cancer	PDE5A_ENSG00000138735	Wald ratio	1	0.000474301	0.000713575	0.506254	-0.000924307	0.00187291	1.00047	0.999076	1.00187
WQbCq7	NVUC7S	Bladder cancer	AP000345.2_ENSG00000272733	Wald ratio	1	-0.000243066	0.000283773	0.391693	-0.000799261	0.000313129	0.999757	0.999201	1.00031
WvroaV	NVUC7S	Bladder cancer	LMO7_ENSG00000136153	Wald ratio	1	-6.59674e-05	0.000387573	0.864848	-0.000825611	0.000693677	0.999934	0.999175	1.00069
wVW5CU	NVUC7S	Bladder cancer	AC009495.1_ENSG00000229195	Wald ratio	1	-3.08448e-05	0.000241187	0.898238	-0.000503572	0.000441882	0.999969	0.999497	1.00044
Wx0oVC	NVUC7S	Bladder cancer	NLRP2_ENSG00000022556	Wald ratio	1	5.07317e-05	0.000271562	0.851806	-0.00048153	0.000582993	1.00005	0.999519	1.00058
X0Mhhr	NVUC7S	Bladder cancer	RNF103-CHMP3_ENSG00000249884	Wald ratio	1	-0.000332896	0.000295064	0.259228	-0.000911222	0.00024543	0.999667	0.999089	1.00025
x1PcHA	NVUC7S	Bladder cancer	LINC01252_ENSG00000247157	MR Egger	3	-0.000502561	0.00328188	0.903265	-0.00693505	0.00592993	0.999498	0.993089	1.00595
x1PcHA	NVUC7S	Bladder cancer	LINC01252_ENSG00000247157	Weighted median	3	0.000369593	0.000175896	0.0356229	2.48376e-05	0.000714349	1.00037	1.00002	1.00071
x1PcHA	NVUC7S	Bladder cancer	LINC01252_ENSG00000247157	Inverse variance weighted	3	0.000367887	0.000146913	0.012276	7.99369e-05	0.000655838	1.00037	1.00008	1.00066
x1PcHA	NVUC7S	Bladder cancer	LINC01252_ENSG00000247157	Simple mode	3	0.000385142	0.000213099	0.212447	-3.25318e-05	0.000802816	1.00039	0.999967	1.0008
x1PcHA	NVUC7S	Bladder cancer	LINC01252_ENSG00000247157	Weighted mode	3	0.000376724	0.000197511	0.196716	-1.03975e-05	0.000763845	1.00038	0.99999	1.00076
X2PEYB	NVUC7S	Bladder cancer	ETFDH_ENSG00000171503	MR Egger	3	-0.000340805	0.00185228	0.884162	-0.00397127	0.00328966	0.999659	0.996037	1.0033
X2PEYB	NVUC7S	Bladder cancer	ETFDH_ENSG00000171503	Weighted median	3	0.000366293	0.000283667	0.196607	-0.000189695	0.000922281	1.00037	0.99981	1.00092
X2PEYB	NVUC7S	Bladder cancer	ETFDH_ENSG00000171503	Inverse variance weighted	3	0.000408129	0.000245592	0.0965497	-7.32317e-05	0.000889489	1.00041	0.999927	1.00089
X2PEYB	NVUC7S	Bladder cancer	ETFDH_ENSG00000171503	Simple mode	3	0.000350087	0.000328834	0.398566	-0.000294428	0.000994603	1.00035	0.999706	1.001
X2PEYB	NVUC7S	Bladder cancer	ETFDH_ENSG00000171503	Weighted mode	3	0.000350087	0.000343286	0.4151	-0.000322754	0.00102293	1.00035	0.999677	1.00102
X8G6GE	NVUC7S	Bladder cancer	MUC20-OT1_ENSG00000242086	Wald ratio	1	-0.000224723	0.000246368	0.361693	-0.000707605	0.000258159	0.999775	0.999293	1.00026
XCgMb1	NVUC7S	Bladder cancer	ATG10_ENSG00000152348	MR Egger	3	-0.00234367	0.00862626	0.831114	-0.0192511	0.0145638	0.997659	0.980933	1.01467
XCgMb1	NVUC7S	Bladder cancer	ATG10_ENSG00000152348	Weighted median	3	-1.06209e-05	0.000114665	0.926201	-0.000235364	0.000214123	0.999989	0.999765	1.00021
XCgMb1	NVUC7S	Bladder cancer	ATG10_ENSG00000152348	Inverse variance weighted	3	1.17746e-05	9.78578e-05	0.904227	-0.000180027	0.000203576	1.00001	0.99982	1.0002
XCgMb1	NVUC7S	Bladder cancer	ATG10_ENSG00000152348	Simple mode	3	-1.38662e-05	0.00013664	0.928427	-0.00028168	0.000253948	0.999986	0.999718	1.00025
XCgMb1	NVUC7S	Bladder cancer	ATG10_ENSG00000152348	Weighted mode	3	-1.41279e-05	0.000133475	0.925364	-0.000275739	0.000247484	0.999986	0.999724	1.00025
xdKq7d	NVUC7S	Bladder cancer	OR2M4_ENSG00000171180	Wald ratio	1	-0.00021792	0.000258237	0.398739	-0.000724064	0.000288224	0.999782	0.999276	1.00029
xLGuNl	NVUC7S	Bladder cancer	MYO6_ENSG00000196586	MR Egger	4	0.00136546	0.00330648	0.719695	-0.00511523	0.00784616	1.00137	0.994898	1.00788
xLGuNl	NVUC7S	Bladder cancer	MYO6_ENSG00000196586	Weighted median	4	-0.000591069	0.000226643	0.00910911	-0.00103529	-0.000146849	0.999409	0.998965	0.999853
xLGuNl	NVUC7S	Bladder cancer	MYO6_ENSG00000196586	Inverse variance weighted	4	-0.000599145	0.000195935	0.00222913	-0.000983178	-0.000215112	0.999401	0.999017	0.999785
xLGuNl	NVUC7S	Bladder cancer	MYO6_ENSG00000196586	Simple mode	4	-0.000699157	0.000302877	0.104184	-0.00129279	-0.000105519	0.999301	0.998708	0.999894
xLGuNl	NVUC7S	Bladder cancer	MYO6_ENSG00000196586	Weighted mode	4	-0.000516872	0.00028818	0.170776	-0.00108171	4.79612e-05	0.999483	0.998919	1.00005
XmkGC0	NVUC7S	Bladder cancer	LEKR1_ENSG00000197980	Inverse variance weighted	2	-2.82839e-05	0.000173686	0.87064	-0.000368708	0.00031214	0.999972	0.999631	1.00031
XsUdO7	NVUC7S	Bladder cancer	LINC01340_ENSG00000250331	Wald ratio	1	0.000104327	0.000253218	0.680335	-0.00039198	0.000600634	1.0001	0.999608	1.0006
Xt3hLo	NVUC7S	Bladder cancer	PRSS55_ENSG00000184647	Wald ratio	1	0.000353694	0.000222505	0.111925	-8.24164e-05	0.000789805	1.00035	0.999918	1.00079
xtH29u	NVUC7S	Bladder cancer	PPIL3_ENSG00000240344	Wald ratio	1	0.000769215	0.000491176	0.117333	-0.00019349	0.00173192	1.00077	0.999807	1.00173
xxLFFv	NVUC7S	Bladder cancer	NARS2_ENSG00000137513	Wald ratio	1	0.000182711	0.000315897	0.563002	-0.000436446	0.000801868	1.00018	0.999564	1.0008
y0sq7Q	NVUC7S	Bladder cancer	C1GALT1_ENSG00000106392	Wald ratio	1	-9.96368e-05	0.000349667	0.775684	-0.000784983	0.00058571	0.9999	0.999215	1.00059
y4VfSI	NVUC7S	Bladder cancer	RAD51C_ENSG00000108384	MR Egger	6	-0.000195014	0.00385103	0.962041	-0.00774303	0.00735301	0.999805	0.992287	1.00738
y4VfSI	NVUC7S	Bladder cancer	RAD51C_ENSG00000108384	Weighted median	6	2.8752e-05	0.000160772	0.858065	-0.00028636	0.000343864	1.00003	0.999714	1.00034
y4VfSI	NVUC7S	Bladder cancer	RAD51C_ENSG00000108384	Inverse variance weighted	6	2.55346e-05	0.000136164	0.851247	-0.000241347	0.000292417	1.00003	0.999759	1.00029
y4VfSI	NVUC7S	Bladder cancer	RAD51C_ENSG00000108384	Simple mode	6	2.851e-05	0.000211859	0.8982	-0.000386733	0.000443754	1.00003	0.999613	1.00044
y4VfSI	NVUC7S	Bladder cancer	RAD51C_ENSG00000108384	Weighted mode	6	2.88195e-05	0.000216586	0.899333	-0.000395689	0.000453328	1.00003	0.999604	1.00045
Ya1V67	NVUC7S	Bladder cancer	EBPL_ENSG00000123179	Wald ratio	1	9.67199e-05	0.000268371	0.718551	-0.000429287	0.000622727	1.0001	0.999571	1.00062
YAvins	NVUC7S	Bladder cancer	AHI1_ENSG00000135541	Wald ratio	1	0.000183207	0.000378682	0.628528	-0.000559011	0.000925424	1.00018	0.999441	1.00093
yb4PVE	NVUC7S	Bladder cancer	ARL17A_ENSG00000185829	Wald ratio	1	0.000118624	0.000302938	0.69537	-0.000475134	0.000712382	1.00012	0.999525	1.00071
YeFVkl	NVUC7S	Bladder cancer	CCDC82_ENSG00000149231	Wald ratio	1	-0.000307657	0.000191465	0.108086	-0.000682929	6.76148e-05	0.999692	0.999317	1.00007
YfFBot	NVUC7S	Bladder cancer	AC093423.3_ENSG00000271949	Wald ratio	1	-0.000291013	0.000335409	0.385594	-0.000948414	0.000366389	0.999709	0.999052	1.00037
yHdXz2	NVUC7S	Bladder cancer	ZNF732_ENSG00000186777	Inverse variance weighted	2	-5.60891e-05	0.000196365	0.775156	-0.000440964	0.000328786	0.999944	0.999559	1.00033
yitKA4	NVUC7S	Bladder cancer	C1QTNF3-AMACR_ENSG00000273294	Wald ratio	1	-0.000495102	0.000425072	0.244121	-0.00132824	0.000338039	0.999505	0.998673	1.00034
ymcvHy	NVUC7S	Bladder cancer	TXNDC15_ENSG00000113621	MR Egger	3	0.000580117	0.00133257	0.738608	-0.00203172	0.00319195	1.00058	0.99797	1.0032
ymcvHy	NVUC7S	Bladder cancer	TXNDC15_ENSG00000113621	Weighted median	3	3.52188e-05	0.000143895	0.806648	-0.000246816	0.000317254	1.00004	0.999753	1.00032
ymcvHy	NVUC7S	Bladder cancer	TXNDC15_ENSG00000113621	Inverse variance weighted	3	4.3497e-05	0.000127473	0.732934	-0.00020635	0.000293344	1.00004	0.999794	1.00029
ymcvHy	NVUC7S	Bladder cancer	TXNDC15_ENSG00000113621	Simple mode	3	-4.40536e-06	0.000174562	0.982158	-0.000346548	0.000337737	0.999996	0.999654	1.00034
ymcvHy	NVUC7S	Bladder cancer	TXNDC15_ENSG00000113621	Weighted mode	3	-3.17989e-06	0.00016831	0.986642	-0.000333067	0.000326707	0.999997	0.999667	1.00033
yOmOHE	NVUC7S	Bladder cancer	GLB1_ENSG00000170266	Wald ratio	1	-0.000442321	0.000295938	0.135009	-0.00102236	0.000137718	0.999558	0.998978	1.00014
yop4Is	NVUC7S	Bladder cancer	PRPSAP1_ENSG00000161542	Wald ratio	1	0.000530785	0.000325446	0.102901	-0.000107088	0.00116866	1.00053	0.999893	1.00117
yP6aF7	NVUC7S	Bladder cancer	FLOT1_ENSG00000137312	MR Egger	12	-0.00233046	0.00308617	0.467584	-0.00837935	0.00371844	0.997672	0.991656	1.00373
yP6aF7	NVUC7S	Bladder cancer	FLOT1_ENSG00000137312	Weighted median	12	-0.000284023	0.000181738	0.118096	-0.000640229	7.21835e-05	0.999716	0.99936	1.00007
yP6aF7	NVUC7S	Bladder cancer	FLOT1_ENSG00000137312	Inverse variance weighted	12	-0.00019177	0.000145895	0.188699	-0.000477725	9.41846e-05	0.999808	0.999522	1.00009
yP6aF7	NVUC7S	Bladder cancer	FLOT1_ENSG00000137312	Simple mode	12	-0.000326779	0.000297545	0.295553	-0.000909968	0.00025641	0.999673	0.99909	1.00026
yP6aF7	NVUC7S	Bladder cancer	FLOT1_ENSG00000137312	Weighted mode	12	-0.000326779	0.000278487	0.265413	-0.000872613	0.000219054	0.999673	0.999128	1.00022
YtZrrJ	NVUC7S	Bladder cancer	PTPN13_ENSG00000163629	MR Egger	4	-0.0016891	0.00911443	0.870069	-0.0195534	0.0161752	0.998312	0.980637	1.01631
YtZrrJ	NVUC7S	Bladder cancer	PTPN13_ENSG00000163629	Weighted median	4	-0.000199266	0.0002679	0.456993	-0.000724349	0.000325817	0.999801	0.999276	1.00033
YtZrrJ	NVUC7S	Bladder cancer	PTPN13_ENSG00000163629	Inverse variance weighted	4	-0.000192952	0.0002432	0.427553	-0.000669624	0.000283721	0.999807	0.999331	1.00028
YtZrrJ	NVUC7S	Bladder cancer	PTPN13_ENSG00000163629	Simple mode	4	-0.000209665	0.000364436	0.605395	-0.000923959	0.000504629	0.99979	0.999076	1.0005
YtZrrJ	NVUC7S	Bladder cancer	PTPN13_ENSG00000163629	Weighted mode	4	-0.000209665	0.000340601	0.581725	-0.000877242	0.000457912	0.99979	0.999123	1.00046
YyPVT8	NVUC7S	Bladder cancer	CBWD2_ENSG00000136682	Wald ratio	1	-0.000120853	0.000327122	0.711796	-0.000762013	0.000520306	0.999879	0.999238	1.00052
zaZdv0	NVUC7S	Bladder cancer	FRG1-DT_ENSG00000245685	Wald ratio	1	-0.000105366	0.000355405	0.766873	-0.000801959	0.000591227	0.999895	0.999198	1.00059
zEpoMr	NVUC7S	Bladder cancer	RCVRN_ENSG00000109047	Wald ratio	1	6.98968e-05	0.000242905	0.773535	-0.000406197	0.00054599	1.00007	0.999594	1.00055
ZHaats	NVUC7S	Bladder cancer	MSH4_ENSG00000057468	Wald ratio	1	-0.000394802	0.000410146	0.335754	-0.00119869	0.000409084	0.999605	0.998802	1.00041
zHvAQ0	NVUC7S	Bladder cancer	ANKRD18B_ENSG00000230453	Wald ratio	1	2.3155e-06	0.000159771	0.988437	-0.000310835	0.000315466	1	0.999689	1.00032
ZKDnAm	NVUC7S	Bladder cancer	LINC00865_ENSG00000232229	Inverse variance weighted	2	-0.00033579	0.000170436	0.0488175	-0.000669844	-1.73544e-06	0.999664	0.99933	0.999998
zMzCP2	NVUC7S	Bladder cancer	NSF_ENSG00000073969	MR Egger	3	-0.00110639	0.0021077	0.692263	-0.00523747	0.00302469	0.998894	0.994776	1.00303
zMzCP2	NVUC7S	Bladder cancer	NSF_ENSG00000073969	Weighted median	3	0.000232594	0.000145943	0.110996	-5.34543e-05	0.000518643	1.00023	0.999947	1.00052
zMzCP2	NVUC7S	Bladder cancer	NSF_ENSG00000073969	Inverse variance weighted	3	0.000266597	0.000121456	0.0281626	2.85438e-05	0.00050465	1.00027	1.00003	1.0005
zMzCP2	NVUC7S	Bladder cancer	NSF_ENSG00000073969	Simple mode	3	0.000227041	0.000166447	0.305776	-9.91956e-05	0.000553278	1.00023	0.999901	1.00055
zMzCP2	NVUC7S	Bladder cancer	NSF_ENSG00000073969	Weighted mode	3	0.000226267	0.000157973	0.288411	-8.33599e-05	0.000535894	1.00023	0.999917	1.00054
zpNbRZ	NVUC7S	Bladder cancer	FBXO17_ENSG00000269190	Wald ratio	1	-0.000460172	0.000432281	0.287093	-0.00130744	0.000387099	0.99954	0.998693	1.00039
ZsBdNF	NVUC7S	Bladder cancer	SLC7A6OS_ENSG00000103061	MR Egger	3	-0.00685438	0.00666803	0.491228	-0.0199237	0.00621496	0.993169	0.980273	1.00623
ZsBdNF	NVUC7S	Bladder cancer	SLC7A6OS_ENSG00000103061	Weighted median	3	-0.000218453	0.000295867	0.460304	-0.000798353	0.000361447	0.999782	0.999202	1.00036
ZsBdNF	NVUC7S	Bladder cancer	SLC7A6OS_ENSG00000103061	Inverse variance weighted	3	-0.000282955	0.000225612	0.209781	-0.000725153	0.000159244	0.999717	0.999275	1.00016
ZsBdNF	NVUC7S	Bladder cancer	SLC7A6OS_ENSG00000103061	Simple mode	3	-0.000140735	0.000327491	0.709257	-0.000782617	0.000501147	0.999859	0.999218	1.0005
ZsBdNF	NVUC7S	Bladder cancer	SLC7A6OS_ENSG00000103061	Weighted mode	3	-0.000144343	0.000364759	0.730532	-0.000859271	0.000570584	0.999856	0.999141	1.00057
zxFXIh	NVUC7S	Bladder cancer	LINC02347_ENSG00000214043	Wald ratio	1	-7.79578e-05	0.000308872	0.800736	-0.000683347	0.000527431	0.999922	0.999317	1.00053
ZxJ0iG	NVUC7S	Bladder cancer	CCDC7_ENSG00000216937	Inverse variance weighted	2	0.000132636	0.000266542	0.618754	-0.000389787	0.000655059	1.00013	0.99961	1.00066
zZA6yb	NVUC7S	Bladder cancer	ZNF880_ENSG00000221923	Wald ratio	1	-0.000191691	0.000257593	0.456778	-0.000696574	0.000313192	0.999808	0.999304	1.00031

## Sheet: Supplementary table 17
id.exposure	id.outcome	outcome	exposure	method	nsnp	b	se	pval	lo_ci	up_ci	or	or_lci95	or_uci95
0XjY3a	T8nbig	Bladder cancer	CA8_ENSG00000178538	Wald ratio	1	0.000382093	0.000244018	0.117386	-9.61823e-05	0.000860369	1.00038	0.999904	1.00086
270v9N	T8nbig	Bladder cancer	LINC01146_ENSG00000258867	Wald ratio	1	0.000408744	0.00040254	0.309908	-0.000380233	0.00119772	1.00041	0.99962	1.0012
2D7Bqq	T8nbig	Bladder cancer	TSPAN33_ENSG00000158457	Wald ratio	1	-0.000150554	0.000220021	0.493804	-0.000581794	0.000280687	0.999849	0.999418	1.00028
2EkHaC	T8nbig	Bladder cancer	KCNC3_ENSG00000131398	Wald ratio	1	9.69472e-05	0.000230478	0.674021	-0.000354789	0.000548684	1.0001	0.999645	1.00055
2gs2Ew	T8nbig	Bladder cancer	RHD_ENSG00000187010	Wald ratio	1	-7.45749e-05	0.000280245	0.790157	-0.000623854	0.000474705	0.999925	0.999376	1.00047
2lOnvC	T8nbig	Bladder cancer	RAB27A_ENSG00000069974	Wald ratio	1	0.000133608	0.00042038	0.750617	-0.000690337	0.000957552	1.00013	0.99931	1.00096
2qNU7E	T8nbig	Bladder cancer	FAM135A_ENSG00000082269	Wald ratio	1	0.000285691	0.00031467	0.363927	-0.000331061	0.000902443	1.00029	0.999669	1.0009
32nk40	T8nbig	Bladder cancer	CPVL_ENSG00000106066	Wald ratio	1	5.69167e-06	0.000230501	0.9803	-0.000446091	0.000457474	1.00001	0.999554	1.00046
3JwSog	T8nbig	Bladder cancer	SRA1_ENSG00000213523	Wald ratio	1	0.000258675	0.000316532	0.413805	-0.000361728	0.000879079	1.00026	0.999638	1.00088
4lSEqk	T8nbig	Bladder cancer	ZDHHC21_ENSG00000175893	Wald ratio	1	-0.00040762	0.000274161	0.13707	-0.000944975	0.000129735	0.999592	0.999055	1.00013
4ZclLc	T8nbig	Bladder cancer	CMTR2_ENSG00000180917	Wald ratio	1	-0.000555465	0.000334371	0.096669	-0.00121083	9.99031e-05	0.999445	0.99879	1.0001
56pyAA	T8nbig	Bladder cancer	KLHDC4_ENSG00000104731	Wald ratio	1	-7.41611e-05	0.00023458	0.751894	-0.000533938	0.000385616	0.999926	0.999466	1.00039
5aSFqx	T8nbig	Bladder cancer	ZDHHC14_ENSG00000175048	Wald ratio	1	4.33039e-05	0.000269289	0.872245	-0.000484503	0.000571111	1.00004	0.999516	1.00057
5MMDyX	T8nbig	Bladder cancer	AC087273.2_ENSG00000254054	Wald ratio	1	-0.000314	0.000418398	0.452964	-0.00113406	0.00050606	0.999686	0.998867	1.00051
63TyQ6	T8nbig	Bladder cancer	CHST13_ENSG00000180767	Wald ratio	1	0.000127292	0.000261681	0.626656	-0.000385603	0.000640186	1.00013	0.999614	1.00064
6auepG	T8nbig	Bladder cancer	MAX_ENSG00000125952	Wald ratio	1	0.000180479	0.000316815	0.568904	-0.000440479	0.000801437	1.00018	0.99956	1.0008
6hO7lU	T8nbig	Bladder cancer	NSUN2_ENSG00000037474	Wald ratio	1	6.84708e-05	0.000204303	0.737516	-0.000331962	0.000468904	1.00007	0.999668	1.00047
6i5kHU	T8nbig	Bladder cancer	ZNF232_ENSG00000167840	Wald ratio	1	0.000126768	0.000255978	0.620437	-0.000374948	0.000628485	1.00013	0.999625	1.00063
6W3ofM	T8nbig	Bladder cancer	MAP2K5_ENSG00000137764	Wald ratio	1	6.50034e-06	0.00030919	0.983227	-0.000599513	0.000612513	1.00001	0.999401	1.00061
7IB9f9	T8nbig	Bladder cancer	SDCCAG8_ENSG00000054282	Wald ratio	1	-0.000381919	0.00029264	0.191865	-0.000955493	0.000191655	0.999618	0.999045	1.00019
7YF4gx	T8nbig	Bladder cancer	PICALM_ENSG00000073921	Wald ratio	1	5.31057e-05	0.00031802	0.867379	-0.000570214	0.000676425	1.00005	0.99943	1.00068
87q4ML	T8nbig	Bladder cancer	ERICH1_ENSG00000104714	Wald ratio	1	-0.000470574	0.000379914	0.215481	-0.00121521	0.000274057	0.99953	0.998786	1.00027
8APP7i	T8nbig	Bladder cancer	CGNL1_ENSG00000128849	Wald ratio	1	1.21977e-05	0.000210337	0.953756	-0.000400063	0.000424458	1.00001	0.9996	1.00042
8BbT1n	T8nbig	Bladder cancer	AC093151.3_ENSG00000235358	Wald ratio	1	4.1087e-05	0.000191859	0.830428	-0.000334956	0.00041713	1.00004	0.999665	1.00042
8cVLIN	T8nbig	Bladder cancer	HLA-DQB1_ENSG00000179344	Wald ratio	1	-8.36586e-05	0.000240515	0.727967	-0.000555067	0.00038775	0.999916	0.999445	1.00039
8JD4zT	T8nbig	Bladder cancer	SUMF1_ENSG00000144455	Wald ratio	1	-5.3875e-05	0.000223467	0.809488	-0.00049187	0.00038412	0.999946	0.999508	1.00038
9aWMZF	T8nbig	Bladder cancer	TIPIN_ENSG00000075131	Wald ratio	1	0.000100115	0.000254643	0.694203	-0.000398986	0.000599216	1.0001	0.999601	1.0006
9RDGiA	T8nbig	Bladder cancer	NUP160_ENSG00000030066	Wald ratio	1	-0.000153323	0.000169236	0.36495	-0.000485025	0.000178379	0.999847	0.999515	1.00018
9RqO85	T8nbig	Bladder cancer	SLC18A1_ENSG00000036565	Wald ratio	1	-0.000449517	0.00026123	0.0852923	-0.000961528	6.24936e-05	0.999551	0.999039	1.00006
9ytVgv	T8nbig	Bladder cancer	LDHC_ENSG00000166796	Wald ratio	1	-0.000147061	0.00020584	0.474953	-0.000550508	0.000256386	0.999853	0.99945	1.00026
abZxAD	T8nbig	Bladder cancer	FGL2_ENSG00000127951	Wald ratio	1	-0.000486201	0.000366092	0.184151	-0.00120374	0.00023134	0.999514	0.998797	1.00023
alMqYG	T8nbig	Bladder cancer	ULK4_ENSG00000168038	Wald ratio	1	0.000318887	0.000297477	0.283733	-0.000264168	0.000901942	1.00032	0.999736	1.0009
AOob6l	T8nbig	Bladder cancer	MYH9_ENSG00000100345	Wald ratio	1	0.000101383	0.000322729	0.753412	-0.000531165	0.000733932	1.0001	0.999469	1.00073
Baht3C	T8nbig	Bladder cancer	LINC01266_ENSG00000224957	Wald ratio	1	-0.000246619	0.000277342	0.373884	-0.00079021	0.000296972	0.999753	0.99921	1.0003
Biyq0L	T8nbig	Bladder cancer	LURAP1_ENSG00000171357	Wald ratio	1	-7.46489e-05	0.000205857	0.716885	-0.000478129	0.000328831	0.999925	0.999522	1.00033
BSFlgH	T8nbig	Bladder cancer	TBC1D3D_ENSG00000274419	Wald ratio	1	0.000290312	0.000317391	0.360359	-0.000331775	0.000912399	1.00029	0.999668	1.00091
btYPmK	T8nbig	Bladder cancer	AC009093.2_ENSG00000260517	Wald ratio	1	0.00014885	0.000307595	0.628445	-0.000454036	0.000751737	1.00015	0.999546	1.00075
C2Au98	T8nbig	Bladder cancer	IL4R_ENSG00000077238	Wald ratio	1	-0.000245059	0.000444683	0.581574	-0.00111664	0.000626519	0.999755	0.998884	1.00063
C63owj	T8nbig	Bladder cancer	ZNF100_ENSG00000197020	Wald ratio	1	0.000233177	0.000178484	0.191406	-0.000116651	0.000583006	1.00023	0.999883	1.00058
cO3xHk	T8nbig	Bladder cancer	AC090630.1_ENSG00000257239	Wald ratio	1	-0.000122933	0.000163328	0.451646	-0.000443057	0.000197191	0.999877	0.999557	1.0002
COJk9G	T8nbig	Bladder cancer	CASP8_ENSG00000064012	Wald ratio	1	1.86155e-06	0.000321426	0.995379	-0.000628133	0.000631857	1	0.999372	1.00063
csbnpo	T8nbig	Bladder cancer	GTF2H2_ENSG00000145736	Wald ratio	1	2.24281e-05	0.000271915	0.934264	-0.000510526	0.000555382	1.00002	0.99949	1.00056
cWsAYC	T8nbig	Bladder cancer	ARL17B_ENSG00000228696	Wald ratio	1	4.76373e-05	0.000122066	0.696346	-0.000191613	0.000286888	1.00005	0.999808	1.00029
d4XOko	T8nbig	Bladder cancer	TSPAN32_ENSG00000064201	Wald ratio	1	-0.000198278	0.000270833	0.464104	-0.000729111	0.000332554	0.999802	0.999271	1.00033
DB8Exi	T8nbig	Bladder cancer	CDC14A_ENSG00000079335	Wald ratio	1	0.000274549	0.000397955	0.490257	-0.000505443	0.00105454	1.00027	0.999495	1.00106
DC24i4	T8nbig	Bladder cancer	GPR65_ENSG00000140030	Wald ratio	1	0.000540722	0.000532514	0.309908	-0.000503005	0.00158445	1.00054	0.999497	1.00159
DTqiqn	T8nbig	Bladder cancer	LRRC37A2_ENSG00000238083	Wald ratio	1	6.68077e-05	0.000171189	0.696346	-0.000268723	0.000402338	1.00007	0.999731	1.0004
DwCSZd	T8nbig	Bladder cancer	ZNF107_ENSG00000196247	Wald ratio	1	-5.01706e-06	0.000283129	0.985862	-0.000559951	0.000549917	0.999995	0.99944	1.00055
EecbdB	T8nbig	Bladder cancer	NBPF3_ENSG00000142794	Wald ratio	1	-5.29579e-05	0.000269244	0.844069	-0.000580676	0.00047476	0.999947	0.999419	1.00047
EGhXql	T8nbig	Bladder cancer	ERAP1_ENSG00000164307	Wald ratio	1	0.000219294	0.000291349	0.45164	-0.000351751	0.000790338	1.00022	0.999648	1.00079
ejiakC	T8nbig	Bladder cancer	SFXN4_ENSG00000183605	Wald ratio	1	9.10995e-05	0.000295728	0.758043	-0.000488528	0.000670727	1.00009	0.999512	1.00067
EuOw5u	T8nbig	Bladder cancer	IQCB1_ENSG00000173226	Wald ratio	1	0.000183564	0.000252327	0.46693	-0.000310997	0.000678124	1.00018	0.999689	1.00068
eWWdJK	T8nbig	Bladder cancer	PTPN14_ENSG00000152104	Wald ratio	1	-0.000166722	0.000284624	0.558036	-0.000724585	0.000391141	0.999833	0.999276	1.00039
eyV9bT	T8nbig	Bladder cancer	SNX19_ENSG00000120451	Wald ratio	1	-5.22452e-05	0.000188819	0.782014	-0.00042233	0.00031784	0.999948	0.999578	1.00032
F7ik5C	T8nbig	Bladder cancer	DLEU7_ENSG00000186047	Wald ratio	1	-6.40052e-05	0.000290982	0.8259	-0.00063433	0.000506319	0.999936	0.999366	1.00051
FCgdRQ	T8nbig	Bladder cancer	RGPD8_ENSG00000169629	Wald ratio	1	-7.35754e-05	0.000348855	0.832961	-0.000757331	0.00061018	0.999926	0.999243	1.00061
fCp64u	T8nbig	Bladder cancer	SPATA20_ENSG00000006282	Wald ratio	1	-0.00014161	0.000247199	0.566741	-0.00062612	0.0003429	0.999858	0.999374	1.00034
FHsKMp	T8nbig	Bladder cancer	PWP2_ENSG00000241945	Wald ratio	1	6.08018e-05	0.000177789	0.73236	-0.000287665	0.000409269	1.00006	0.999712	1.00041
fNkAwT	T8nbig	Bladder cancer	APTX_ENSG00000137074	Wald ratio	1	0.000531274	0.000272531	0.0512464	-2.88593e-06	0.00106543	1.00053	0.999997	1.00107
FTY8je	T8nbig	Bladder cancer	SERPINF2_ENSG00000167711	Wald ratio	1	8.59121e-05	0.000272968	0.752964	-0.000449105	0.000620929	1.00009	0.999551	1.00062
G1om1m	T8nbig	Bladder cancer	U2AF1_ENSG00000160201	Wald ratio	1	4.93129e-05	0.000181815	0.786218	-0.000307045	0.000405671	1.00005	0.999693	1.00041
G21c6s	T8nbig	Bladder cancer	NPRL3_ENSG00000103148	Wald ratio	1	0.000438144	0.000377189	0.245397	-0.000301147	0.00117743	1.00044	0.999699	1.00118
GFXEKn	T8nbig	Bladder cancer	GNAQ_ENSG00000156052	Wald ratio	1	9.95989e-05	0.000425989	0.815135	-0.000735339	0.000934536	1.0001	0.999265	1.00093
gn6jAr	T8nbig	Bladder cancer	FRG1-DT_ENSG00000245685	Wald ratio	1	-6.4108e-05	0.000208828	0.758851	-0.00047341	0.000345194	0.999936	0.999527	1.00035
gzHmWH	T8nbig	Bladder cancer	NAGK_ENSG00000124357	Wald ratio	1	4.98903e-05	0.000301289	0.86848	-0.000540637	0.000640417	1.00005	0.99946	1.00064
hanPZn	T8nbig	Bladder cancer	FOXN2_ENSG00000170802	Wald ratio	1	-0.00051565	0.000274116	0.0599528	-0.00105292	2.16166e-05	0.999484	0.998948	1.00002
hDJ5hd	T8nbig	Bladder cancer	ETS2_ENSG00000157557	Wald ratio	1	2.20896e-06	0.000271583	0.99351	-0.000530094	0.000534512	1	0.99947	1.00053
HeaVvK	T8nbig	Bladder cancer	SEMA4D_ENSG00000187764	Wald ratio	1	0.00032639	0.000353294	0.355566	-0.000366066	0.00101885	1.00033	0.999634	1.00102
hEEgFB	T8nbig	Bladder cancer	RIN3_ENSG00000100599	Wald ratio	1	-0.000278088	0.000342984	0.417487	-0.000950337	0.000394161	0.999722	0.99905	1.00039
heO5yn	T8nbig	Bladder cancer	PLB1_ENSG00000163803	Wald ratio	1	0.000401018	0.000289068	0.165357	-0.000165556	0.000967591	1.0004	0.999834	1.00097
HiJhUi	T8nbig	Bladder cancer	AC244131.2_ENSG00000275119	Wald ratio	1	0.000551086	0.000323755	0.0887235	-8.34738e-05	0.00118565	1.00055	0.999917	1.00119
hOB2nQ	T8nbig	Bladder cancer	TMEM163_ENSG00000152128	Wald ratio	1	0.000317001	0.000297222	0.286176	-0.000265553	0.000899555	1.00032	0.999734	1.0009
hXGI8L	T8nbig	Bladder cancer	NPIPB2_ENSG00000234719	Wald ratio	1	0.000117725	0.0002311	0.610464	-0.00033523	0.00057068	1.00012	0.999665	1.00057
I74jIL	T8nbig	Bladder cancer	SLC4A7_ENSG00000033867	Wald ratio	1	-0.000366647	0.000368456	0.319693	-0.00108882	0.000355527	0.999633	0.998912	1.00036
iAQe65	T8nbig	Bladder cancer	VPS53_ENSG00000141252	Wald ratio	1	-4.62249e-06	0.00035173	0.989514	-0.000694013	0.000684768	0.999995	0.999306	1.00069
iLkNDx	T8nbig	Bladder cancer	GATD3A_ENSG00000160221	Wald ratio	1	7.245e-05	0.00021185	0.73236	-0.000342775	0.000487675	1.00007	0.999657	1.00049
iscWNU	T8nbig	Bladder cancer	LINC01340_ENSG00000250331	Wald ratio	1	-8.52855e-07	0.000181892	0.996259	-0.000357362	0.000355656	0.999999	0.999643	1.00036
IWXQmd	T8nbig	Bladder cancer	PIAS1_ENSG00000033800	Wald ratio	1	0.000357652	0.000311806	0.251368	-0.000253488	0.000968792	1.00036	0.999747	1.00097
iXTcQy	T8nbig	Bladder cancer	MSH4_ENSG00000057468	Wald ratio	1	-6.12038e-05	0.000286898	0.83107	-0.000623524	0.000501117	0.999939	0.999377	1.0005
j24QR2	T8nbig	Bladder cancer	SYNDIG1_ENSG00000101463	Wald ratio	1	-1.44082e-05	0.000362129	0.968262	-0.000724181	0.000695365	0.999986	0.999276	1.0007
jarspu	T8nbig	Bladder cancer	BTN3A2_ENSG00000186470	Wald ratio	1	-3.71755e-06	0.000280721	0.989434	-0.00055393	0.000546495	0.999996	0.999446	1.00055
jJuLeQ	T8nbig	Bladder cancer	MUC20-OT1_ENSG00000242086	Wald ratio	1	0.000269195	0.000211108	0.202255	-0.000144577	0.000682967	1.00027	0.999855	1.00068
jPdQJI	T8nbig	Bladder cancer	AP000350.6_ENSG00000273295	Wald ratio	1	0.000201427	0.000170218	0.236671	-0.0001322	0.000535055	1.0002	0.999868	1.00054
k9dzWt	T8nbig	Bladder cancer	ZNF586_ENSG00000083828	Wald ratio	1	-0.000101445	0.000254871	0.690611	-0.000600991	0.000398101	0.999899	0.999399	1.0004
kcxAnB	T8nbig	Bladder cancer	TNS3_ENSG00000136205	Wald ratio	1	0.000285771	0.000401108	0.476184	-0.000500401	0.00107194	1.00029	0.9995	1.00107
KfiqiQ	T8nbig	Bladder cancer	LSP1_ENSG00000130592	Wald ratio	1	-0.000135587	0.000326641	0.678073	-0.000775804	0.00050463	0.999864	0.999224	1.0005
KKFvNC	T8nbig	Bladder cancer	ACCS_ENSG00000110455	Wald ratio	1	6.87429e-05	0.000243943	0.778098	-0.000409386	0.000546871	1.00007	0.999591	1.00055
kKkE2F	T8nbig	Bladder cancer	GCC2_ENSG00000135968	Wald ratio	1	2.99636e-05	0.000310857	0.92321	-0.000579315	0.000639242	1.00003	0.999421	1.00064
KNQHC4	T8nbig	Bladder cancer	TIAM1_ENSG00000156299	Wald ratio	1	0.000290878	0.000359751	0.418771	-0.000414233	0.00099599	1.00029	0.999586	1.001
kS6pBz	T8nbig	Bladder cancer	CLHC1_ENSG00000162994	Wald ratio	1	-7.00543e-05	0.00017393	0.687115	-0.000410957	0.000270849	0.99993	0.999589	1.00027
L1kNAH	T8nbig	Bladder cancer	ANGPTL6_ENSG00000130812	Wald ratio	1	3.76379e-05	0.000272347	0.890084	-0.000496162	0.000571438	1.00004	0.999504	1.00057
l5ycWR	T8nbig	Bladder cancer	SCAT1_ENSG00000267123	Wald ratio	1	0.000131898	0.00031571	0.676105	-0.000486893	0.00075069	1.00013	0.999513	1.00075
lceVDg	T8nbig	Bladder cancer	AL391095.1_ENSG00000224635	Wald ratio	1	3.66136e-05	0.000321352	0.909289	-0.000593237	0.000666464	1.00004	0.999407	1.00067
LEDcqb	T8nbig	Bladder cancer	DNAJC15_ENSG00000120675	Wald ratio	1	6.54497e-06	0.000277229	0.981165	-0.000536824	0.000549914	1.00001	0.999463	1.00055
LFFzV4	T8nbig	Bladder cancer	TRDC_ENSG00000211829	Wald ratio	1	-0.000488155	0.000397973	0.219971	-0.00126818	0.000291871	0.999512	0.998733	1.00029
lgQm4t	T8nbig	Bladder cancer	SUSD1_ENSG00000106868	Wald ratio	1	0.000152917	0.000235462	0.516059	-0.000308589	0.000614422	1.00015	0.999691	1.00061
LmLGrs	T8nbig	Bladder cancer	DPYS_ENSG00000147647	Wald ratio	1	1.22438e-05	0.00030559	0.968041	-0.000586714	0.000611201	1.00001	0.999413	1.00061
Lpvwmv	T8nbig	Bladder cancer	CARMIL1_ENSG00000079691	Wald ratio	1	-0.000158215	0.000242222	0.51364	-0.000632969	0.00031654	0.999842	0.999367	1.00032
lXdXQc	T8nbig	Bladder cancer	GPRC5C_ENSG00000170412	Wald ratio	1	-0.000345199	0.000277556	0.213606	-0.000889208	0.00019881	0.999655	0.999111	1.0002
mbDl4C	T8nbig	Bladder cancer	APIP_ENSG00000149089	Wald ratio	1	-0.000237274	0.000148946	0.111156	-0.000529209	5.46604e-05	0.999763	0.999471	1.00005
meA37u	T8nbig	Bladder cancer	NMRK1_ENSG00000106733	Wald ratio	1	8.82224e-05	0.000235436	0.707869	-0.000373232	0.000549676	1.00009	0.999627	1.00055
MgKiCI	T8nbig	Bladder cancer	DMXL2_ENSG00000104093	Wald ratio	1	0.000120065	0.000419455	0.774695	-0.000702067	0.000942196	1.00012	0.999298	1.00094
MPYp4i	T8nbig	Bladder cancer	MEF2A_ENSG00000068305	Wald ratio	1	1.4622e-05	0.00035659	0.967292	-0.000684294	0.000713538	1.00001	0.999316	1.00071
mUsi0s	T8nbig	Bladder cancer	AL160408.3_ENSG00000230628	Wald ratio	1	-2.01756e-05	0.000285859	0.943733	-0.000580459	0.000540108	0.99998	0.99942	1.00054
MVtcqu	T8nbig	Bladder cancer	AC008759.3_ENSG00000277587	Wald ratio	1	-0.000379404	0.000362787	0.295652	-0.00109047	0.000331659	0.999621	0.99891	1.00033
n69P5M	T8nbig	Bladder cancer	LINC02232_ENSG00000250125	Wald ratio	1	0.000320792	0.000331479	0.333165	-0.000328907	0.000970492	1.00032	0.999671	1.00097
n7FBn6	T8nbig	Bladder cancer	AC096887.1_ENSG00000272305	Wald ratio	1	-8.66635e-05	0.000189787	0.647933	-0.000458646	0.000285319	0.999913	0.999541	1.00029
N8nkmF	T8nbig	Bladder cancer	AC062021.1_ENSG00000226939	Wald ratio	1	-0.000308227	0.000284955	0.2794	-0.00086674	0.000250285	0.999692	0.999134	1.00025
N8rryn	T8nbig	Bladder cancer	MS4A14_ENSG00000166928	Wald ratio	1	0.000502701	0.000416726	0.227698	-0.000314082	0.00131948	1.0005	0.999686	1.00132
NbbcCk	T8nbig	Bladder cancer	ZNF215_ENSG00000149054	Wald ratio	1	5.92224e-05	0.000249749	0.812558	-0.000430285	0.00054873	1.00006	0.99957	1.00055
ndG5AF	T8nbig	Bladder cancer	MFSD13A_ENSG00000138111	Wald ratio	1	3.02046e-05	0.000297385	0.9191	-0.000552671	0.00061308	1.00003	0.999447	1.00061
NeRwUw	T8nbig	Bladder cancer	AC024084.1_ENSG00000230649	Wald ratio	1	-0.000192207	0.000182604	0.29253	-0.00055011	0.000165697	0.999808	0.99945	1.00017
NXMPwT	T8nbig	Bladder cancer	MOCOS_ENSG00000075643	Wald ratio	1	-0.000177583	0.000291673	0.542629	-0.000749261	0.000394096	0.999822	0.999251	1.00039
NyiM71	T8nbig	Bladder cancer	TP53INP1_ENSG00000164938	Wald ratio	1	-0.000363282	0.000367786	0.323273	-0.00108414	0.000357579	0.999637	0.998916	1.00036
NZLdQm	T8nbig	Bladder cancer	LINC00865_ENSG00000232229	Wald ratio	1	-0.000367898	0.000346495	0.28834	-0.00104703	0.000311232	0.999632	0.998954	1.00031
o5jQmG	T8nbig	Bladder cancer	PPFIA1_ENSG00000131626	Wald ratio	1	-0.000467166	0.000412904	0.257881	-0.00127646	0.000342126	0.999533	0.998724	1.00034
OEmnDG	T8nbig	Bladder cancer	CENPP_ENSG00000188312	Wald ratio	1	-0.000102313	0.000247682	0.679546	-0.00058777	0.000383144	0.999898	0.999412	1.00038
oeoFNQ	T8nbig	Bladder cancer	PRKCB_ENSG00000166501	Wald ratio	1	0.000262091	0.000250078	0.294621	-0.000228061	0.000752243	1.00026	0.999772	1.00075
OeSsbg	T8nbig	Bladder cancer	NPIPB13_ENSG00000198064	Wald ratio	1	-0.000471618	0.000276251	0.0877829	-0.00101307	6.98332e-05	0.999528	0.998987	1.00007
OgqVkz	T8nbig	Bladder cancer	TMPRSS4_ENSG00000137648	Wald ratio	1	0.000243224	0.000416499	0.559238	-0.000573114	0.00105956	1.00024	0.999427	1.00106
okaA7d	T8nbig	Bladder cancer	PPT1_ENSG00000131238	Wald ratio	1	-0.000352634	0.000296704	0.234635	-0.000934175	0.000228907	0.999647	0.999066	1.00023
OLOIyU	T8nbig	Bladder cancer	GLB1L_ENSG00000163521	Wald ratio	1	0.000100357	0.000322794	0.755876	-0.00053232	0.000733033	1.0001	0.999468	1.00073
oPCrJp	T8nbig	Bladder cancer	CHST15_ENSG00000182022	Wald ratio	1	0.000418537	0.000444378	0.34627	-0.000452445	0.00128952	1.00042	0.999548	1.00129
oTIAxk	T8nbig	Bladder cancer	SIDT2_ENSG00000149577	Wald ratio	1	-0.000126176	0.000280129	0.652406	-0.000675229	0.000422876	0.999874	0.999325	1.00042
p9j5sB	T8nbig	Bladder cancer	STEAP3_ENSG00000115107	Wald ratio	1	0.000170293	0.000355859	0.632266	-0.00052719	0.000867775	1.00017	0.999473	1.00087
peVm1G	T8nbig	Bladder cancer	TRIM66_ENSG00000166436	Wald ratio	1	-0.000426982	0.000263698	0.105402	-0.00094383	8.9866e-05	0.999573	0.999057	1.00009
PFNtGC	T8nbig	Bladder cancer	FAM3B_ENSG00000183844	Wald ratio	1	6.76986e-05	0.000253825	0.78969	-0.000429798	0.000565195	1.00007	0.99957	1.00057
q0k5hw	T8nbig	Bladder cancer	FARP2_ENSG00000006607	Wald ratio	1	0.000338455	0.000323602	0.295608	-0.000295805	0.000972716	1.00034	0.999704	1.00097
q6oIJN	T8nbig	Bladder cancer	USP53_ENSG00000145390	Wald ratio	1	0.000287191	0.000220417	0.192594	-0.000144827	0.000719208	1.00029	0.999855	1.00072
qAoLbH	T8nbig	Bladder cancer	AC034195.1_ENSG00000223727	Wald ratio	1	-7.58256e-05	0.000314516	0.809488	-0.000692276	0.000540625	0.999924	0.999308	1.00054
QFxIMy	T8nbig	Bladder cancer	EFL1_ENSG00000140598	Wald ratio	1	-0.00036234	0.000324645	0.264375	-0.000998644	0.000273965	0.999638	0.999002	1.00027
QKcgHi	T8nbig	Bladder cancer	HLA-DRB5_ENSG00000198502	Wald ratio	1	1.14776e-05	0.000147581	0.93801	-0.00027778	0.000300736	1.00001	0.999722	1.0003
qlccbB	T8nbig	Bladder cancer	PTPRJ_ENSG00000149177	Wald ratio	1	3.11131e-05	0.000300379	0.917503	-0.00055763	0.000619856	1.00003	0.999443	1.00062
QZCnke	T8nbig	Bladder cancer	LINC00539_ENSG00000224429	Wald ratio	1	-0.000129712	0.000266028	0.625843	-0.000651127	0.000391703	0.99987	0.999349	1.00039
rG27Jl	T8nbig	Bladder cancer	SLC22A18_ENSG00000110628	Wald ratio	1	9.06464e-05	0.000188725	0.631008	-0.000279255	0.000460548	1.00009	0.999721	1.00046
rZH9PH	T8nbig	Bladder cancer	VPS9D1_ENSG00000075399	Wald ratio	1	-6.01549e-05	0.000213701	0.778334	-0.00047901	0.0003587	0.99994	0.999521	1.00036
s2FSqj	T8nbig	Bladder cancer	PILRB_ENSG00000121716	Wald ratio	1	-0.000350342	0.000200801	0.0810335	-0.000743913	4.32284e-05	0.99965	0.999256	1.00004
S5meYl	T8nbig	Bladder cancer	LIPA_ENSG00000107798	Wald ratio	1	1.23737e-05	0.000312367	0.968402	-0.000599865	0.000624613	1.00001	0.9994	1.00062
S7FuR7	T8nbig	Bladder cancer	IGHMBP2_ENSG00000132740	Wald ratio	1	-0.00025709	0.000283741	0.364897	-0.000813222	0.000299042	0.999743	0.999187	1.0003
s8djDw	T8nbig	Bladder cancer	STK10_ENSG00000072786	Wald ratio	1	-0.000146462	0.000250489	0.558747	-0.000637421	0.000344497	0.999854	0.999363	1.00034
sBWB65	T8nbig	Bladder cancer	GAA_ENSG00000171298	Wald ratio	1	0.000276625	0.000321097	0.388963	-0.000352726	0.000905976	1.00028	0.999647	1.00091
sRvg3I	T8nbig	Bladder cancer	HLA-A_ENSG00000206503	Wald ratio	1	-0.000367955	0.000359813	0.306484	-0.00107319	0.000337279	0.999632	0.998927	1.00034
Ss4Aaq	T8nbig	Bladder cancer	MARK3_ENSG00000075413	Wald ratio	1	-0.000520821	0.000280514	0.0633583	-0.00107063	2.89858e-05	0.999479	0.99893	1.00003
T0NX1f	T8nbig	Bladder cancer	SMIM35_ENSG00000255274	Wald ratio	1	0.00010405	0.000178175	0.559238	-0.000245174	0.000453273	1.0001	0.999755	1.00045
t3peim	T8nbig	Bladder cancer	C12orf42_ENSG00000179088	Wald ratio	1	4.1429e-05	0.000332546	0.900855	-0.000610362	0.00069322	1.00004	0.99939	1.00069
t640Az	T8nbig	Bladder cancer	SLFN5_ENSG00000166750	Wald ratio	1	-3.77669e-05	0.000229236	0.86914	-0.000487069	0.000411535	0.999962	0.999513	1.00041
t7AN20	T8nbig	Bladder cancer	DDX11_ENSG00000013573	Wald ratio	1	-7.86031e-05	0.000236231	0.739332	-0.000541616	0.000384409	0.999921	0.999459	1.00038
Tk1X9p	T8nbig	Bladder cancer	CCZ1_ENSG00000122674	Wald ratio	1	0.000177774	0.000318667	0.576934	-0.000446813	0.000802362	1.00018	0.999553	1.0008
tNW5y5	T8nbig	Bladder cancer	FUT10_ENSG00000172728	Wald ratio	1	-0.000187753	0.000298698	0.529631	-0.000773202	0.000397696	0.999812	0.999227	1.0004
Tx9VsN	T8nbig	Bladder cancer	PMEPA1_ENSG00000124225	Wald ratio	1	-0.000428272	0.000500605	0.392269	-0.00140946	0.000552914	0.999572	0.998592	1.00055
u9ySqc	T8nbig	Bladder cancer	PCM1_ENSG00000078674	Wald ratio	1	0.000405384	0.000368828	0.271718	-0.000317518	0.00112829	1.00041	0.999683	1.00113
uBi4Ry	T8nbig	Bladder cancer	PPHLN1_ENSG00000134283	Wald ratio	1	-0.000125069	0.000287636	0.663694	-0.000688835	0.000438697	0.999875	0.999311	1.00044
ugsd3o	T8nbig	Bladder cancer	NUPL2_ENSG00000136243	Wald ratio	1	-0.000285136	0.000268308	0.28791	-0.000811021	0.000240748	0.999715	0.999189	1.00024
uJa2l3	T8nbig	Bladder cancer	ERAP2_ENSG00000164308	Wald ratio	1	-0.000213377	0.000239067	0.372102	-0.000681948	0.000255193	0.999787	0.999318	1.00026
Um3GCy	T8nbig	Bladder cancer	MPPE1_ENSG00000154889	Wald ratio	1	-0.00036203	0.000331392	0.274635	-0.00101156	0.000287499	0.999638	0.998989	1.00029
UQc6gt	T8nbig	Bladder cancer	MINDY2_ENSG00000128923	Wald ratio	1	0.000289719	0.000292617	0.322126	-0.000283809	0.000863247	1.00029	0.999716	1.00086
UU0Pg6	T8nbig	Bladder cancer	KANSL1_ENSG00000120071	Wald ratio	1	6.37211e-05	0.00016328	0.696346	-0.000256307	0.000383749	1.00006	0.999744	1.00038
uUJCvD	T8nbig	Bladder cancer	RAB3IL1_ENSG00000167994	Wald ratio	1	-0.000114994	0.000285536	0.687147	-0.000674644	0.000444656	0.999885	0.999326	1.00044
vhXZEO	T8nbig	Bladder cancer	PAX8_ENSG00000125618	Wald ratio	1	4.60588e-06	0.000208727	0.982395	-0.000404499	0.000413711	1	0.999596	1.00041
Vq4Cqp	T8nbig	Bladder cancer	RASGEF1C_ENSG00000146090	Wald ratio	1	-8.38944e-06	0.000350478	0.980903	-0.000695327	0.000678548	0.999992	0.999305	1.00068
vWTBF3	T8nbig	Bladder cancer	IGFLR1_ENSG00000126246	Wald ratio	1	-0.00024024	0.000271553	0.376324	-0.000772484	0.000292004	0.99976	0.999228	1.00029
vwYY9j	T8nbig	Bladder cancer	PDXK_ENSG00000160209	Wald ratio	1	0.000171858	0.00017298	0.320461	-0.000167184	0.000510899	1.00017	0.999833	1.00051
VX97kb	T8nbig	Bladder cancer	MTRF1L_ENSG00000112031	Wald ratio	1	0.000379755	0.000350513	0.278619	-0.000307251	0.00106676	1.00038	0.999693	1.00107
W3GWU3	T8nbig	Bladder cancer	AMPD3_ENSG00000133805	Wald ratio	1	0.000643592	0.00038232	0.0923005	-0.000105755	0.00139294	1.00064	0.999894	1.00139
WekIYM	T8nbig	Bladder cancer	POU5F1_ENSG00000204531	Wald ratio	1	0.000385131	0.0002153	0.0736448	-3.68564e-05	0.000807119	1.00039	0.999963	1.00081
wVcBZH	T8nbig	Bladder cancer	GPR161_ENSG00000143147	Wald ratio	1	-0.000238214	0.000313513	0.44736	-0.000852699	0.000376271	0.999762	0.999148	1.00038
X4L6d1	T8nbig	Bladder cancer	AP003774.3_ENSG00000231680	Wald ratio	1	0.000147754	0.000277962	0.595028	-0.000397051	0.00069256	1.00015	0.999603	1.00069
x5OiWT	T8nbig	Bladder cancer	STPG2_ENSG00000163116	Wald ratio	1	-0.00048376	0.000346841	0.163088	-0.00116357	0.000196048	0.999516	0.998837	1.0002
XbVl9G	T8nbig	Bladder cancer	TANC1_ENSG00000115183	Wald ratio	1	-0.000344905	0.000364607	0.344167	-0.00105953	0.000369724	0.999655	0.998941	1.00037
XzvGcX	T8nbig	Bladder cancer	AL589843.1_ENSG00000224848	Wald ratio	1	0.000379005	0.00025816	0.142077	-0.000126989	0.000884999	1.00038	0.999873	1.00089
Y9W65K	T8nbig	Bladder cancer	SLC7A6_ENSG00000103064	Wald ratio	1	-0.000154896	0.000286283	0.588467	-0.00071601	0.000406218	0.999845	0.999284	1.00041
yH6vRb	T8nbig	Bladder cancer	AC093423.3_ENSG00000271949	Wald ratio	1	-0.00019486	0.000214822	0.364365	-0.000615911	0.000226191	0.999805	0.999384	1.00023
yLotdo	T8nbig	Bladder cancer	MVB12B_ENSG00000196814	Wald ratio	1	-0.000570793	0.000348125	0.101084	-0.00125312	0.000111532	0.999429	0.998748	1.00011
yoIY65	T8nbig	Bladder cancer	HCG22_ENSG00000228789	Wald ratio	1	-4.41641e-05	0.000218563	0.839865	-0.000472548	0.000384219	0.999956	0.999528	1.00038
z68BAs	T8nbig	Bladder cancer	LINC00958_ENSG00000251381	Wald ratio	1	8.92685e-05	0.000330667	0.787187	-0.000558839	0.000737376	1.00009	0.999441	1.00074
Z9IecR	T8nbig	Bladder cancer	ALG1L2_ENSG00000251287	Wald ratio	1	0.000202882	0.000323935	0.531115	-0.000432031	0.000837796	1.0002	0.999568	1.00084
zOs2F8	T8nbig	Bladder cancer	AC078845.1_ENSG00000232053	Wald ratio	1	-0.000187968	0.000178577	0.29253	-0.000537978	0.000162042	0.999812	0.999462	1.00016
ZW4ija	T8nbig	Bladder cancer	GNLY_ENSG00000115523	Wald ratio	1	0.000265306	0.000178408	0.136994	-8.43729e-05	0.000614985	1.00027	0.999916	1.00062

## Sheet: Supplementary table 18
id.exposure	id.outcome	outcome	exposure	method	nsnp	b	se	pval	lo_ci	up_ci	or	or_lci95	or_uci95
011GVb	vp2gYX	Bladder cancer	FUT2_ENSG00000176920	Wald ratio	1	0.000155942	0.000435798	0.72047	-0.000698221	0.0010101	1.00016	0.999302	1.00101
02RMUG	vp2gYX	Bladder cancer	OSGEP_ENSG00000092094	Wald ratio	1	-0.000532222	0.000405871	0.189754	-0.00132773	0.000263286	0.999468	0.998673	1.00026
0KORZh	vp2gYX	Bladder cancer	ANKRD44_ENSG00000065413	Wald ratio	1	-0.000327961	0.000312319	0.293679	-0.000940106	0.000284183	0.999672	0.99906	1.00028
0lRmwt	vp2gYX	Bladder cancer	KANSL1_ENSG00000120071	Wald ratio	1	7.50386e-05	0.000147899	0.611899	-0.000214843	0.00036492	1.00008	0.999785	1.00036
0O6yUe	vp2gYX	Bladder cancer	AC012617.1_ENSG00000267053	Wald ratio	1	3.1304e-05	0.000287961	0.913433	-0.000533099	0.000595707	1.00003	0.999467	1.0006
0xDBM5	vp2gYX	Bladder cancer	AC027644.4_ENSG00000284461	Wald ratio	1	0.000377039	0.00044357	0.395319	-0.000492359	0.00124644	1.00038	0.999508	1.00125
0ZKwMI	vp2gYX	Bladder cancer	CLHC1_ENSG00000162994	Wald ratio	1	-6.45726e-05	0.00016032	0.687115	-0.0003788	0.000249655	0.999935	0.999621	1.00025
16LYZU	vp2gYX	Bladder cancer	ACCS_ENSG00000110455	Wald ratio	1	6.42492e-05	0.000227997	0.778098	-0.000382624	0.000511123	1.00006	0.999617	1.00051
17vrzu	vp2gYX	Bladder cancer	PWRN1_ENSG00000259905	Wald ratio	1	-0.000207649	0.000188407	0.270404	-0.000576926	0.000161628	0.999792	0.999423	1.00016
195dM7	vp2gYX	Bladder cancer	PPP1R3B_ENSG00000173281	Wald ratio	1	3.69725e-05	0.000293914	0.899895	-0.000539099	0.000613044	1.00004	0.999461	1.00061
1BuYoh	vp2gYX	Bladder cancer	PIGF_ENSG00000151665	Wald ratio	1	-0.000155121	0.000309948	0.616741	-0.000762619	0.000452377	0.999845	0.999238	1.00045
1CdYIN	vp2gYX	Bladder cancer	ADAM12_ENSG00000148848	Wald ratio	1	-0.000393507	0.000327032	0.228873	-0.00103449	0.000247476	0.999607	0.998966	1.00025
1DIGmI	vp2gYX	Bladder cancer	UNC79_ENSG00000133958	Wald ratio	1	0.000708126	0.000376489	0.0599902	-2.97933e-05	0.00144605	1.00071	0.99997	1.00145
1eE6es	vp2gYX	Bladder cancer	AP1G1_ENSG00000166747	Wald ratio	1	8.55908e-05	0.000282515	0.76192	-0.000468139	0.000639321	1.00009	0.999532	1.00064
1LnGhR	vp2gYX	Bladder cancer	CDH1_ENSG00000039068	Wald ratio	1	-0.00038598	0.000434513	0.374377	-0.00123763	0.000465666	0.999614	0.998763	1.00047
1zTpI6	vp2gYX	Bladder cancer	ERGIC3_ENSG00000125991	Wald ratio	1	0.000456391	0.000246715	0.0643322	-2.71705e-05	0.000939952	1.00046	0.999973	1.00094
29Vd4J	vp2gYX	Bladder cancer	MRI1_ENSG00000037757	Wald ratio	1	0.000119177	0.00025896	0.645362	-0.000388385	0.00062674	1.00012	0.999612	1.00063
2BPHA2	vp2gYX	Bladder cancer	GPHN_ENSG00000171723	Wald ratio	1	-0.000595316	0.000471194	0.206438	-0.00151886	0.000328225	0.999405	0.998482	1.00033
2dcy4s	vp2gYX	Bladder cancer	AL139383.1_ENSG00000230490	Wald ratio	1	-2.69841e-05	0.000223418	0.903866	-0.000464883	0.000410915	0.999973	0.999535	1.00041
2eO890	vp2gYX	Bladder cancer	CROCC_ENSG00000058453	Wald ratio	1	-7.6316e-05	0.000320937	0.812043	-0.000705353	0.000552721	0.999924	0.999295	1.00055
2g9jDY	vp2gYX	Bladder cancer	DPYSL5_ENSG00000157851	Wald ratio	1	0.000170244	0.000241982	0.481719	-0.00030404	0.000644528	1.00017	0.999696	1.00064
2KRzs0	vp2gYX	Bladder cancer	IQCB1_ENSG00000173226	Wald ratio	1	0.000188957	0.000260115	0.467571	-0.000320868	0.000698783	1.00019	0.999679	1.0007
2oF35U	vp2gYX	Bladder cancer	PLEKHH2_ENSG00000152527	Wald ratio	1	-0.00017142	0.000244652	0.48351	-0.000650939	0.000308098	0.999829	0.999349	1.00031
2VH4SZ	vp2gYX	Bladder cancer	ROM1_ENSG00000149489	Wald ratio	1	0.000332435	0.00034254	0.331797	-0.000338943	0.00100381	1.00033	0.999661	1.001
31kqbj	vp2gYX	Bladder cancer	AC005154.5_ENSG00000281039	Wald ratio	1	-0.000449396	0.000241684	0.0629652	-0.000923096	2.43045e-05	0.999551	0.999077	1.00002
35NKhu	vp2gYX	Bladder cancer	YLPM1_ENSG00000119596	Wald ratio	1	-3.9041e-05	0.000316352	0.901783	-0.000659092	0.00058101	0.999961	0.999341	1.00058
382V7m	vp2gYX	Bladder cancer	PHACTR4_ENSG00000204138	Wald ratio	1	-0.000168191	0.000279291	0.547038	-0.000715602	0.00037922	0.999832	0.999285	1.00038
38IiZE	vp2gYX	Bladder cancer	TIAM1_ENSG00000156299	Wald ratio	1	-0.000327202	0.000243349	0.178762	-0.000804166	0.000149763	0.999673	0.999196	1.00015
39slLY	vp2gYX	Bladder cancer	ODF3L2_ENSG00000181781	Wald ratio	1	0.000215235	0.000311855	0.490083	-0.000396001	0.000826472	1.00022	0.999604	1.00083
3C943H	vp2gYX	Bladder cancer	TULP3_ENSG00000078246	Wald ratio	1	-0.000114292	0.000251618	0.649665	-0.000607463	0.000378879	0.999886	0.999393	1.00038
3ccSR4	vp2gYX	Bladder cancer	FYN_ENSG00000010810	Wald ratio	1	0.000461589	0.000572828	0.420354	-0.000661155	0.00158433	1.00046	0.999339	1.00159
3CJglG	vp2gYX	Bladder cancer	BCAS1_ENSG00000064787	Wald ratio	1	3.30706e-05	0.000416065	0.936647	-0.000782416	0.000848557	1.00003	0.999218	1.00085
3hHnqb	vp2gYX	Bladder cancer	RNASEH2B_ENSG00000136104	Wald ratio	1	6.93459e-06	0.000227994	0.975735	-0.000439933	0.000453802	1.00001	0.99956	1.00045
3hQVJk	vp2gYX	Bladder cancer	GALNT13_ENSG00000144278	Wald ratio	1	-0.000285365	0.000422844	0.499757	-0.00111414	0.000543408	0.999715	0.998886	1.00054
3jz0eT	vp2gYX	Bladder cancer	ACOT1_ENSG00000184227	Wald ratio	1	-1.91935e-05	0.000248667	0.938476	-0.000506582	0.000468195	0.999981	0.999494	1.00047
3Q6Gsw	vp2gYX	Bladder cancer	TTC3_ENSG00000182670	Wald ratio	1	8.58328e-05	0.000211438	0.684781	-0.000328587	0.000500252	1.00009	0.999671	1.0005
3sIjGl	vp2gYX	Bladder cancer	LRRC37A2_ENSG00000238083	Wald ratio	1	8.65221e-05	0.000170532	0.611899	-0.000247721	0.000420765	1.00009	0.999752	1.00042
3UPxLJ	vp2gYX	Bladder cancer	LINC02018_ENSG00000272690	Wald ratio	1	-0.000168675	0.000249061	0.49825	-0.000656834	0.000319484	0.999831	0.999343	1.00032
3znZos	vp2gYX	Bladder cancer	RPN1_ENSG00000163902	Wald ratio	1	0.00048452	0.000333674	0.146481	-0.000169482	0.00113852	1.00048	0.999831	1.00114
43LnyH	vp2gYX	Bladder cancer	ARSI_ENSG00000183876	Wald ratio	1	-0.00020258	0.00024492	0.408165	-0.000682624	0.000277463	0.999797	0.999318	1.00028
46l2ba	vp2gYX	Bladder cancer	FADS1_ENSG00000149485	Wald ratio	1	8.65893e-05	0.000390037	0.824312	-0.000677883	0.000851062	1.00009	0.999322	1.00085
475xH6	vp2gYX	Bladder cancer	MCM9_ENSG00000111877	Wald ratio	1	-0.000656267	0.000410778	0.110128	-0.00146139	0.000148859	0.999344	0.99854	1.00015
4CuaTn	vp2gYX	Bladder cancer	CENPP_ENSG00000188312	Wald ratio	1	-7.55844e-05	0.000182976	0.679546	-0.000434218	0.000283049	0.999924	0.999566	1.00028
4cY2Dl	vp2gYX	Bladder cancer	TM2D3_ENSG00000184277	Wald ratio	1	-0.00010086	0.00051541	0.844854	-0.00111106	0.000909344	0.999899	0.99889	1.00091
4hB0vk	vp2gYX	Bladder cancer	SLC4A8_ENSG00000050438	Wald ratio	1	0.000198629	0.000289028	0.491938	-0.000367867	0.000765124	1.0002	0.999632	1.00077
4KTiqy	vp2gYX	Bladder cancer	MFSD12_ENSG00000161091	Wald ratio	1	-6.72601e-05	0.000323902	0.835498	-0.000702108	0.000567588	0.999933	0.999298	1.00057
4ovVRM	vp2gYX	Bladder cancer	U2AF1_ENSG00000160201	Wald ratio	1	3.63653e-05	0.000134078	0.786218	-0.000226427	0.000299157	1.00004	0.999774	1.0003
4qSb61	vp2gYX	Bladder cancer	VSIG10_ENSG00000176834	Wald ratio	1	-0.000106275	0.000468678	0.820615	-0.00102488	0.000812335	0.999894	0.998976	1.00081
4ViFdL	vp2gYX	Bladder cancer	SLCO1A2_ENSG00000084453	Wald ratio	1	-0.000303595	0.000388087	0.434046	-0.00106424	0.000457055	0.999696	0.998936	1.00046
57G2vR	vp2gYX	Bladder cancer	DDO_ENSG00000203797	Wald ratio	1	9.36947e-05	0.000296728	0.752185	-0.000487892	0.000675281	1.00009	0.999512	1.00068
58gxZv	vp2gYX	Bladder cancer	COL28A1_ENSG00000215018	Wald ratio	1	0.000292208	0.000171562	0.0885267	-4.40536e-05	0.00062847	1.00029	0.999956	1.00063
5CimFX	vp2gYX	Bladder cancer	CCDC149_ENSG00000181982	Wald ratio	1	0.000107515	0.000267936	0.688221	-0.00041764	0.00063267	1.00011	0.999582	1.00063
5hlVS5	vp2gYX	Bladder cancer	RCBTB1_ENSG00000136144	Wald ratio	1	-0.00017779	0.000182139	0.329005	-0.000534783	0.000179204	0.999822	0.999465	1.00018
5iC2ov	vp2gYX	Bladder cancer	PPP2R1B_ENSG00000137713	Wald ratio	1	-0.000469933	0.0003714	0.205764	-0.00119788	0.000258012	0.99953	0.998803	1.00026
5Q7rKy	vp2gYX	Bladder cancer	LINC01252_ENSG00000247157	Wald ratio	1	0.000345689	0.000203087	0.0887235	-5.2362e-05	0.000743741	1.00035	0.999948	1.00074
5SLajV	vp2gYX	Bladder cancer	VAMP8_ENSG00000118640	Wald ratio	1	-3.62563e-05	0.000296547	0.902692	-0.000617489	0.000544977	0.999964	0.999383	1.00055
5YL6dv	vp2gYX	Bladder cancer	SYT14_ENSG00000143469	Wald ratio	1	1.87896e-05	0.000164193	0.908893	-0.00030303	0.000340609	1.00002	0.999697	1.00034
6FK5DT	vp2gYX	Bladder cancer	CACNA2D4_ENSG00000151062	Wald ratio	1	-0.000108209	0.000330801	0.743583	-0.00075658	0.000540162	0.999892	0.999244	1.00054
6JXbZp	vp2gYX	Bladder cancer	SERINC5_ENSG00000164300	Wald ratio	1	-3.62831e-05	0.000389621	0.925805	-0.00079994	0.000727374	0.999964	0.9992	1.00073
6lCTOU	vp2gYX	Bladder cancer	LINC01068_ENSG00000227676	Wald ratio	1	0.000157937	0.000222118	0.477053	-0.000277415	0.00059329	1.00016	0.999723	1.00059
6NUQPk	vp2gYX	Bladder cancer	PPP2R2B_ENSG00000156475	Wald ratio	1	-0.000386388	0.000511792	0.450267	-0.0013895	0.000616724	0.999614	0.998611	1.00062
6SQ6k7	vp2gYX	Bladder cancer	ALS2_ENSG00000003393	Wald ratio	1	6.55177e-05	0.000350943	0.851904	-0.000622331	0.000753367	1.00007	0.999378	1.00075
6tplPI	vp2gYX	Bladder cancer	LINC01792_ENSG00000237166	Wald ratio	1	0.000251756	0.00031878	0.429674	-0.000373053	0.000876566	1.00025	0.999627	1.00088
6VP1Bd	vp2gYX	Bladder cancer	LINC01856_ENSG00000237574	Wald ratio	1	-3.52082e-05	0.000447665	0.937312	-0.000912631	0.000842215	0.999965	0.999088	1.00084
6XsZFr	vp2gYX	Bladder cancer	LINC02427_ENSG00000271538	Wald ratio	1	0.000290806	0.000307517	0.344323	-0.000311927	0.000893538	1.00029	0.999688	1.00089
6XxkPv	vp2gYX	Bladder cancer	ANKRD18A_ENSG00000180071	Wald ratio	1	3.45149e-05	0.000268114	0.89757	-0.000490989	0.000560019	1.00003	0.999509	1.00056
74PfJ0	vp2gYX	Bladder cancer	TPGS2_ENSG00000134779	Wald ratio	1	0.000147954	0.000334796	0.658546	-0.000508246	0.000804153	1.00015	0.999492	1.0008
76tOix	vp2gYX	Bladder cancer	LTBP1_ENSG00000049323	Wald ratio	1	-0.000125613	0.000278185	0.651597	-0.000670856	0.00041963	0.999874	0.999329	1.00042
7dPhWM	vp2gYX	Bladder cancer	WDFY2_ENSG00000139668	Wald ratio	1	-0.000436326	0.00028263	0.122636	-0.000990281	0.00011763	0.999564	0.99901	1.00012
7emU9N	vp2gYX	Bladder cancer	PGS1_ENSG00000087157	Wald ratio	1	-0.000113996	0.000260804	0.662043	-0.000625172	0.00039718	0.999886	0.999375	1.0004
7iA61u	vp2gYX	Bladder cancer	SPSB2_ENSG00000111671	Wald ratio	1	-2.0401e-05	0.000361989	0.955057	-0.0007299	0.000689098	0.99998	0.99927	1.00069
7m32tY	vp2gYX	Bladder cancer	TRMT10B_ENSG00000165275	Wald ratio	1	-0.000182783	0.000499474	0.714402	-0.00116175	0.000796186	0.999817	0.998839	1.0008
7MK7Mh	vp2gYX	Bladder cancer	FADS2_ENSG00000134824	Wald ratio	1	7.87705e-05	0.000354818	0.824312	-0.000616673	0.000774214	1.00008	0.999384	1.00077
7MPdW3	vp2gYX	Bladder cancer	TMEM45A_ENSG00000181458	Wald ratio	1	0.000128076	0.000145832	0.37981	-0.000157754	0.000413907	1.00013	0.999842	1.00041
7RDCfD	vp2gYX	Bladder cancer	RNF144A_ENSG00000151692	Wald ratio	1	-0.000318601	0.000320626	0.320378	-0.000947029	0.000309827	0.999681	0.999053	1.00031
7WZIi2	vp2gYX	Bladder cancer	SPECC1_ENSG00000128487	Wald ratio	1	-0.000944378	0.000487115	0.0525361	-0.00189912	1.03684e-05	0.999056	0.998103	1.00001
7xuQ0T	vp2gYX	Bladder cancer	TMEM171_ENSG00000157111	Wald ratio	1	-0.000142359	0.000212551	0.503008	-0.000558959	0.000274241	0.999858	0.999441	1.00027
81Jobc	vp2gYX	Bladder cancer	MIR4300HG_ENSG00000245832	Wald ratio	1	8.54857e-05	0.000177669	0.63041	-0.000262746	0.000433718	1.00009	0.999737	1.00043
8ASuIq	vp2gYX	Bladder cancer	C3orf20_ENSG00000131379	Wald ratio	1	-8.87708e-05	0.000154187	0.564795	-0.000390977	0.000213436	0.999911	0.999609	1.00021
8ddx8M	vp2gYX	Bladder cancer	AL138881.1_ENSG00000228793	Wald ratio	1	-0.000241679	0.000141587	0.0878344	-0.000519189	3.58309e-05	0.999758	0.999481	1.00004
8qL87t	vp2gYX	Bladder cancer	AC116366.3_ENSG00000283782	Wald ratio	1	0.000278007	0.000493784	0.573425	-0.000689809	0.00124582	1.00028	0.99931	1.00125
8Re8Do	vp2gYX	Bladder cancer	C10orf67_ENSG00000179133	Wald ratio	1	-0.000195447	0.000277486	0.481216	-0.000739319	0.000348426	0.999805	0.999261	1.00035
8xl01Y	vp2gYX	Bladder cancer	CPSF1_ENSG00000071894	Wald ratio	1	0.000416589	0.000343014	0.224559	-0.000255719	0.0010889	1.00042	0.999744	1.00109
8ZCQfH	vp2gYX	Bladder cancer	AC015845.2_ENSG00000265542	Wald ratio	1	-0.000180541	0.000357713	0.613763	-0.000881659	0.000520577	0.999819	0.999119	1.00052
91JtB6	vp2gYX	Bladder cancer	AC011478.1_ENSG00000267760	Wald ratio	1	-0.000316353	0.000370966	0.393779	-0.00104345	0.000410739	0.999684	0.998957	1.00041
93LsjH	vp2gYX	Bladder cancer	NVL_ENSG00000143748	Wald ratio	1	-0.000124389	0.000449021	0.781762	-0.00100447	0.000755693	0.999876	0.998996	1.00076
9dDEOC	vp2gYX	Bladder cancer	JAKMIP3_ENSG00000188385	Wald ratio	1	-0.000436263	0.000366642	0.23409	-0.00115488	0.000282356	0.999564	0.998846	1.00028
9eV50m	vp2gYX	Bladder cancer	ACSL1_ENSG00000151726	Wald ratio	1	-0.000695123	0.000409248	0.0894062	-0.00149725	0.000107003	0.999305	0.998504	1.00011
9hkPgP	vp2gYX	Bladder cancer	MYO5A_ENSG00000197535	Wald ratio	1	-2.67985e-05	0.000272096	0.921544	-0.000560106	0.000506509	0.999973	0.99944	1.00051
9HS3mV	vp2gYX	Bladder cancer	AF117829.1_ENSG00000251136	Wald ratio	1	8.58445e-05	0.000347916	0.80511	-0.000596072	0.000767761	1.00009	0.999404	1.00077
9hXLsP	vp2gYX	Bladder cancer	NDUFV1_ENSG00000167792	Wald ratio	1	-2.17394e-05	0.000495257	0.964988	-0.000992443	0.000948965	0.999978	0.999008	1.00095
9uEhA8	vp2gYX	Bladder cancer	SELL_ENSG00000188404	Wald ratio	1	0.000184475	0.00022988	0.422274	-0.00026609	0.00063504	1.00018	0.999734	1.00064
9vg3ii	vp2gYX	Bladder cancer	AL589843.1_ENSG00000224848	Wald ratio	1	0.000267275	0.000182055	0.142077	-8.95525e-05	0.000624103	1.00027	0.99991	1.00062
a3VsCh	vp2gYX	Bladder cancer	AC017074.1_ENSG00000227359	Wald ratio	1	0.000182118	0.000348079	0.600828	-0.000500116	0.000864353	1.00018	0.9995	1.00086
A4eSsj	vp2gYX	Bladder cancer	ACER3_ENSG00000078124	Wald ratio	1	-0.000122454	0.000251684	0.626585	-0.000615754	0.000370846	0.999878	0.999384	1.00037
A7Xl0C	vp2gYX	Bladder cancer	USP6NL_ENSG00000148429	Wald ratio	1	-5.98526e-05	0.000276694	0.828743	-0.000602172	0.000482467	0.99994	0.999398	1.00048
aAX0uC	vp2gYX	Bladder cancer	PRKD3_ENSG00000115825	Wald ratio	1	-0.000157781	0.000214242	0.461451	-0.000577695	0.000262134	0.999842	0.999422	1.00026
AhN4hT	vp2gYX	Bladder cancer	THEM4_ENSG00000159445	Wald ratio	1	-9.26717e-05	0.000487385	0.849199	-0.00104795	0.000862603	0.999907	0.998953	1.00086
AL6QPi	vp2gYX	Bladder cancer	ZNF649_ENSG00000198093	Wald ratio	1	-0.000468435	0.00037838	0.215715	-0.00121006	0.00027319	0.999532	0.998791	1.00027
alWK3o	vp2gYX	Bladder cancer	SLC16A8_ENSG00000100156	Wald ratio	1	0.000712435	0.000417823	0.0881739	-0.000106499	0.00153137	1.00071	0.999894	1.00153
AnKr7B	vp2gYX	Bladder cancer	CAPZB_ENSG00000077549	Wald ratio	1	-0.000599096	0.000446131	0.179314	-0.00147351	0.000275321	0.999401	0.998528	1.00028
APBsSp	vp2gYX	Bladder cancer	SYNE2_ENSG00000054654	Wald ratio	1	-8.72285e-05	0.00034383	0.79973	-0.000761135	0.000586678	0.999913	0.999239	1.00059
APZHGU	vp2gYX	Bladder cancer	ADAM15_ENSG00000143537	Wald ratio	1	0.000164674	0.000374655	0.660275	-0.000569651	0.000898998	1.00016	0.999431	1.0009
AtgbGW	vp2gYX	Bladder cancer	LDHC_ENSG00000166796	Wald ratio	1	-0.00010761	0.00015062	0.474953	-0.000402825	0.000187606	0.999892	0.999597	1.00019
aveXKd	vp2gYX	Bladder cancer	PSRC1_ENSG00000134222	Wald ratio	1	-7.28022e-05	0.000398059	0.854882	-0.000852999	0.000707394	0.999927	0.999147	1.00071
AZ078N	vp2gYX	Bladder cancer	ARHGEF3_ENSG00000163947	Wald ratio	1	6.34522e-05	0.0001621	0.695474	-0.000254264	0.000381168	1.00006	0.999746	1.00038
AZvsfz	vp2gYX	Bladder cancer	LINC01182_ENSG00000250634	Wald ratio	1	-6.02764e-05	0.0001915	0.752945	-0.000435617	0.000315064	0.99994	0.999564	1.00032
AzY6gB	vp2gYX	Bladder cancer	TBC1D2_ENSG00000095383	Wald ratio	1	0.000300121	0.000336269	0.372123	-0.000358966	0.000959207	1.0003	0.999641	1.00096
b15qIK	vp2gYX	Bladder cancer	LINC00987_ENSG00000237248	Wald ratio	1	-0.000210342	0.000445448	0.636782	-0.00108342	0.000662736	0.99979	0.998917	1.00066
B2ZnXY	vp2gYX	Bladder cancer	POLR2F_ENSG00000100142	Wald ratio	1	0.000649514	0.000380922	0.0881739	-9.70933e-05	0.00139612	1.00065	0.999903	1.0014
B3Ems0	vp2gYX	Bladder cancer	AC027020.2_ENSG00000270127	Wald ratio	1	0.000139819	0.000171083	0.413779	-0.000195503	0.000475141	1.00014	0.999805	1.00048
B8aa3W	vp2gYX	Bladder cancer	MMP24OS_ENSG00000126005	Wald ratio	1	3.72998e-05	0.000260727	0.886242	-0.000473725	0.000548324	1.00004	0.999526	1.00055
B8DYlb	vp2gYX	Bladder cancer	CNTN2_ENSG00000184144	Wald ratio	1	-0.000244402	0.000466668	0.600475	-0.00115907	0.000670266	0.999756	0.998842	1.00067
b9UmYD	vp2gYX	Bladder cancer	ATE1_ENSG00000107669	Wald ratio	1	0.000224331	0.000278717	0.420893	-0.000321953	0.000770616	1.00022	0.999678	1.00077
BBWLbd	vp2gYX	Bladder cancer	KNOP1_ENSG00000103550	Wald ratio	1	2.08417e-05	0.000178164	0.906876	-0.00032836	0.000370044	1.00002	0.999672	1.00037
BDz3bI	vp2gYX	Bladder cancer	AL139352.1_ENSG00000132832	Wald ratio	1	-0.000203584	0.000260922	0.435244	-0.000714991	0.000307823	0.999796	0.999285	1.00031
BF1FfG	vp2gYX	Bladder cancer	LINC01299_ENSG00000254081	Wald ratio	1	-0.00033991	0.000260627	0.192165	-0.000850739	0.000170919	0.99966	0.99915	1.00017
bFDSz4	vp2gYX	Bladder cancer	FAM221A_ENSG00000188732	Wald ratio	1	0.000184522	0.000128732	0.15175	-6.77932e-05	0.000436837	1.00018	0.999932	1.00044
bHohHj	vp2gYX	Bladder cancer	DPYSL4_ENSG00000151640	Wald ratio	1	-0.000552423	0.000464265	0.23409	-0.00146238	0.000357536	0.999448	0.998539	1.00036
bKYthM	vp2gYX	Bladder cancer	AL359881.3_ENSG00000270171	Wald ratio	1	0.000209854	0.000279828	0.45329	-0.000338608	0.000758316	1.00021	0.999661	1.00076
bOa7d8	vp2gYX	Bladder cancer	NAPG_ENSG00000134265	Wald ratio	1	-0.000216912	0.000159142	0.172879	-0.000528831	9.50059e-05	0.999783	0.999471	1.0001
BoITF2	vp2gYX	Bladder cancer	SEMA5A_ENSG00000112902	Wald ratio	1	0.000519821	0.000387535	0.179806	-0.000239748	0.00127939	1.00052	0.99976	1.00128
BSIVIc	vp2gYX	Bladder cancer	RSPO4_ENSG00000101282	Wald ratio	1	6.60559e-05	0.000234559	0.778237	-0.00039368	0.000525792	1.00007	0.999606	1.00053
bTE5sT	vp2gYX	Bladder cancer	SMIM22_ENSG00000267795	Wald ratio	1	0.000669385	0.000502319	0.182666	-0.00031516	0.00165393	1.00067	0.999685	1.00166
BWERvo	vp2gYX	Bladder cancer	PSMD13_ENSG00000185627	Wald ratio	1	-0.000375105	0.000405019	0.354373	-0.00116894	0.000418733	0.999625	0.998832	1.00042
BXKpYr	vp2gYX	Bladder cancer	CDK10_ENSG00000185324	Wald ratio	1	-9.75209e-05	0.000431229	0.821088	-0.00094273	0.000747688	0.999902	0.999058	1.00075
bYpHHl	vp2gYX	Bladder cancer	HSD17B13_ENSG00000170509	Wald ratio	1	4.86168e-05	0.000177716	0.784419	-0.000299706	0.00039694	1.00005	0.9997	1.0004
C1Lxzm	vp2gYX	Bladder cancer	RPS6KA5_ENSG00000100784	Wald ratio	1	0.000128323	0.000281814	0.648861	-0.000424033	0.000680679	1.00013	0.999576	1.00068
c2ZO2T	vp2gYX	Bladder cancer	NEB_ENSG00000183091	Wald ratio	1	-0.00054657	0.000413194	0.185905	-0.00135643	0.000263291	0.999454	0.998644	1.00026
c8557J	vp2gYX	Bladder cancer	RAPGEF3_ENSG00000079337	Wald ratio	1	0.000162861	0.000244852	0.50596	-0.000317048	0.00064277	1.00016	0.999683	1.00064
cHYKeY	vp2gYX	Bladder cancer	LHFPL2_ENSG00000145685	Wald ratio	1	0.000396481	0.000455569	0.384137	-0.000496433	0.0012894	1.0004	0.999504	1.00129
cIFfOM	vp2gYX	Bladder cancer	LRRC4B_ENSG00000131409	Wald ratio	1	-0.00038181	0.000474298	0.42082	-0.00131144	0.000547815	0.999618	0.998689	1.00055
ckL25c	vp2gYX	Bladder cancer	AL022322.1_ENSG00000272720	Wald ratio	1	0.000592656	0.000347577	0.0881739	-8.85938e-05	0.00127391	1.00059	0.999911	1.00127
cklfav	vp2gYX	Bladder cancer	CCZ1_ENSG00000122674	Wald ratio	1	-7.63552e-05	0.000271659	0.778657	-0.000608807	0.000456097	0.999924	0.999391	1.00046
CmQkkY	vp2gYX	Bladder cancer	COP1_ENSG00000143207	Wald ratio	1	0.000576841	0.000550963	0.295113	-0.000503045	0.00165673	1.00058	0.999497	1.00166
CoqvML	vp2gYX	Bladder cancer	NSRP1_ENSG00000126653	Wald ratio	1	-0.000222638	0.000380469	0.558435	-0.000968357	0.000523081	0.999777	0.999032	1.00052
coUZwK	vp2gYX	Bladder cancer	CLTCL1_ENSG00000070371	Wald ratio	1	-0.00047538	0.000357221	0.183264	-0.00117553	0.000224773	0.999525	0.998825	1.00022
coyIrH	vp2gYX	Bladder cancer	AC010175.1_ENSG00000256427	Wald ratio	1	-0.000122019	0.000258403	0.636782	-0.000628488	0.000384451	0.999878	0.999372	1.00038
Cqfjz6	vp2gYX	Bladder cancer	POLI_ENSG00000101751	Wald ratio	1	-0.000709701	0.000448255	0.113364	-0.00158828	0.000168879	0.999291	0.998413	1.00017
cqq7Bh	vp2gYX	Bladder cancer	AC007405.1_ENSG00000234350	Wald ratio	1	5.47242e-05	0.000288469	0.84954	-0.000510676	0.000620124	1.00005	0.999489	1.00062
cqSYon	vp2gYX	Bladder cancer	NOX4_ENSG00000086991	Wald ratio	1	3.62099e-05	0.000188118	0.847363	-0.000332502	0.000404922	1.00004	0.999668	1.00041
Cz8KIf	vp2gYX	Bladder cancer	CDH23_ENSG00000107736	Wald ratio	1	0.000280961	0.000327684	0.391216	-0.0003613	0.000923223	1.00028	0.999639	1.00092
czzfdw	vp2gYX	Bladder cancer	TMEM132C_ENSG00000181234	Wald ratio	1	-2.18881e-06	0.00016669	0.989523	-0.000328902	0.000324524	0.999998	0.999671	1.00032
d9A62V	vp2gYX	Bladder cancer	TNIK_ENSG00000154310	Wald ratio	1	2.93023e-05	0.00019238	0.878939	-0.000347762	0.000406367	1.00003	0.999652	1.00041
D9kGUc	vp2gYX	Bladder cancer	SCARB2_ENSG00000138760	Wald ratio	1	-0.000140667	0.000445512	0.752198	-0.00101387	0.000732536	0.999859	0.998987	1.00073
DD8xOc	vp2gYX	Bladder cancer	TRIM35_ENSG00000104228	Wald ratio	1	0.0002773	0.00018671	0.137494	-8.86519e-05	0.000643252	1.00028	0.999911	1.00064
DeApK3	vp2gYX	Bladder cancer	ADGRB3_ENSG00000135298	Wald ratio	1	7.50134e-05	0.00020485	0.714225	-0.000326492	0.000476519	1.00008	0.999674	1.00048
DfxTqu	vp2gYX	Bladder cancer	AC046168.2_ENSG00000259420	Wald ratio	1	0.000245968	0.000270126	0.362523	-0.000283479	0.000775415	1.00025	0.999717	1.00078
dGsL9x	vp2gYX	Bladder cancer	ADAMTS18_ENSG00000140873	Wald ratio	1	2.89947e-06	0.000103469	0.977644	-0.000199899	0.000205698	1	0.9998	1.00021
dGv5TU	vp2gYX	Bladder cancer	GPR180_ENSG00000152749	Wald ratio	1	-0.000178275	0.000174809	0.307812	-0.000520901	0.000164351	0.999822	0.999479	1.00016
dJhiTS	vp2gYX	Bladder cancer	NUMB_ENSG00000133961	Wald ratio	1	0.000440915	0.000385674	0.252943	-0.000315007	0.00119684	1.00044	0.999685	1.0012
DNIDd6	vp2gYX	Bladder cancer	GPR135_ENSG00000181619	Wald ratio	1	0.000839367	0.000459323	0.0676393	-6.0905e-05	0.00173964	1.00084	0.999939	1.00174
Dpfp8x	vp2gYX	Bladder cancer	TSPAN15_ENSG00000099282	Wald ratio	1	-0.000466859	0.000346649	0.178053	-0.00114629	0.000212574	0.999533	0.998854	1.00021
dqbIAO	vp2gYX	Bladder cancer	TDRD6_ENSG00000180113	Wald ratio	1	-0.000158805	0.000307543	0.605599	-0.000761589	0.00044398	0.999841	0.999239	1.00044
DrkO4G	vp2gYX	Bladder cancer	STMN4_ENSG00000015592	Wald ratio	1	0.000218287	0.000146976	0.137494	-6.97855e-05	0.000506359	1.00022	0.99993	1.00051
DSiy9K	vp2gYX	Bladder cancer	NMUR2_ENSG00000132911	Wald ratio	1	-0.000658126	0.000438903	0.13375	-0.00151838	0.000202125	0.999342	0.998483	1.0002
duEyqT	vp2gYX	Bladder cancer	TAF1B_ENSG00000115750	Wald ratio	1	-0.000572371	0.000300539	0.056848	-0.00116143	1.66866e-05	0.999428	0.998839	1.00002
dwWhCK	vp2gYX	Bladder cancer	C1GALT1_ENSG00000106392	Wald ratio	1	3.02547e-05	0.000187192	0.871602	-0.000336642	0.000397152	1.00003	0.999663	1.0004
DxlGTs	vp2gYX	Bladder cancer	SLC46A3_ENSG00000139508	Wald ratio	1	3.06178e-05	0.000270357	0.909833	-0.000499282	0.000560518	1.00003	0.999501	1.00056
DyHVd4	vp2gYX	Bladder cancer	ARPC2_ENSG00000163466	Wald ratio	1	-4.67688e-05	0.000312515	0.881038	-0.000659298	0.00056576	0.999953	0.999341	1.00057
DySnVd	vp2gYX	Bladder cancer	GLIPR2_ENSG00000122694	Wald ratio	1	-0.000139456	0.000403159	0.729413	-0.000929648	0.000650737	0.999861	0.999071	1.00065
e20jl6	vp2gYX	Bladder cancer	KCNE1_ENSG00000180509	Wald ratio	1	0.000319423	0.000283245	0.259436	-0.000235738	0.000874584	1.00032	0.999764	1.00087
E7qaSG	vp2gYX	Bladder cancer	LATS1_ENSG00000131023	Wald ratio	1	-0.000539856	0.000495326	0.275756	-0.00151069	0.000430982	0.99946	0.99849	1.00043
eADMDi	vp2gYX	Bladder cancer	C17orf100_ENSG00000256806	Wald ratio	1	0.000141754	0.000164791	0.389675	-0.000181236	0.000464744	1.00014	0.999819	1.00046
EAZxaM	vp2gYX	Bladder cancer	AKIRIN1_ENSG00000174574	Wald ratio	1	-0.000202879	0.000154254	0.188433	-0.000505216	9.94584e-05	0.999797	0.999495	1.0001
eBAsdl	vp2gYX	Bladder cancer	PHACTR2_ENSG00000112419	Wald ratio	1	-0.000203223	0.000288693	0.48147	-0.000769061	0.000362616	0.999797	0.999231	1.00036
EFzfKz	vp2gYX	Bladder cancer	SRGAP3_ENSG00000196220	Wald ratio	1	0.000181743	0.000385942	0.637706	-0.000574703	0.000938189	1.00018	0.999425	1.00094
egljDS	vp2gYX	Bladder cancer	TPTEP2-CSNK1E_ENSG00000283900	Inverse variance weighted	2	0.000495532	0.000212598	0.019762	7.88391e-05	0.000912225	1.0005	1.00008	1.00091
eHXt7t	vp2gYX	Bladder cancer	INSR_ENSG00000171105	Wald ratio	1	0.000273128	0.000374246	0.465507	-0.000460394	0.00100665	1.00027	0.99954	1.00101
Ei9PMI	vp2gYX	Bladder cancer	TMEM259_ENSG00000182087	Wald ratio	1	0.000223622	0.000583366	0.701475	-0.000919775	0.00136702	1.00022	0.999081	1.00137
eM267J	vp2gYX	Bladder cancer	CABCOCO1_ENSG00000183346	Wald ratio	1	-0.000162185	0.000255124	0.524965	-0.000662228	0.000337858	0.999838	0.999338	1.00034
en1pn8	vp2gYX	Bladder cancer	CDH2_ENSG00000170558	Wald ratio	1	-0.000268259	0.000224457	0.23203	-0.000708195	0.000171677	0.999732	0.999292	1.00017
EpagJi	vp2gYX	Bladder cancer	C20orf194_ENSG00000088854	Wald ratio	1	-0.000903259	0.000511489	0.0774058	-0.00190578	9.92591e-05	0.999097	0.998096	1.0001
eQI6io	vp2gYX	Bladder cancer	AC244131.2_ENSG00000275119	Wald ratio	1	0.000328574	0.000193032	0.0887235	-4.97695e-05	0.000706917	1.00033	0.99995	1.00071
EQt9m4	vp2gYX	Bladder cancer	SPDYE1_ENSG00000136206	Wald ratio	1	0.000826557	0.000623819	0.185173	-0.000396128	0.00204924	1.00083	0.999604	1.00205
eRirRJ	vp2gYX	Bladder cancer	SP110_ENSG00000135899	Wald ratio	1	4.42275e-05	0.000341253	0.896881	-0.000624629	0.000713084	1.00004	0.999376	1.00071
erjYge	vp2gYX	Bladder cancer	ZFYVE28_ENSG00000159733	Wald ratio	1	-0.000232505	0.000316462	0.462523	-0.000852771	0.000387762	0.999768	0.999148	1.00039
eSp89s	vp2gYX	Bladder cancer	AC107871.2_ENSG00000260657	Wald ratio	1	0.000334779	0.000208151	0.107759	-7.31972e-05	0.000742756	1.00033	0.999927	1.00074
EvyZcS	vp2gYX	Bladder cancer	CTTN_ENSG00000085733	Wald ratio	1	-2.93612e-05	0.000303547	0.922943	-0.000624313	0.000565591	0.999971	0.999376	1.00057
F697dI	vp2gYX	Bladder cancer	ZNF100_ENSG00000197020	Wald ratio	1	0.000175314	0.000138066	0.204163	-9.52963e-05	0.000445924	1.00018	0.999905	1.00045
f8iWt6	vp2gYX	Bladder cancer	ATP2B4_ENSG00000058668	Wald ratio	1	0.000100128	0.000333162	0.763765	-0.000552868	0.000753125	1.0001	0.999447	1.00075
fbbsZG	vp2gYX	Bladder cancer	XRCC5_ENSG00000079246	Wald ratio	1	0.000269799	0.00029473	0.359975	-0.000307871	0.00084747	1.00027	0.999692	1.00085
fBYQrV	vp2gYX	Bladder cancer	WDR11_ENSG00000120008	Wald ratio	1	-0.000499963	0.000354081	0.15795	-0.00119396	0.000194036	0.9995	0.998807	1.00019
fE2e1z	vp2gYX	Bladder cancer	LRRFIP2_ENSG00000093167	Wald ratio	1	0.000503899	0.000334406	0.131849	-0.000151536	0.00115933	1.0005	0.999848	1.00116
Fg8p3y	vp2gYX	Bladder cancer	LAMA2_ENSG00000196569	Wald ratio	1	-0.000177435	0.000271478	0.513375	-0.000709532	0.000354661	0.999823	0.999291	1.00035
Fi98Xo	vp2gYX	Bladder cancer	TRAF1_ENSG00000056558	Wald ratio	1	-0.000434798	0.000304232	0.152957	-0.00103109	0.000161497	0.999565	0.998969	1.00016
FLaT7M	vp2gYX	Bladder cancer	CCNB1IP1_ENSG00000100814	Wald ratio	1	-0.000338976	0.000382187	0.375113	-0.00108806	0.000410111	0.999661	0.998913	1.00041
fOzpU3	vp2gYX	Bladder cancer	GSKIP_ENSG00000100744	Wald ratio	1	-0.000305128	0.000337214	0.365545	-0.000966068	0.000355812	0.999695	0.999034	1.00036
FRMHIL	vp2gYX	Bladder cancer	GBA2_ENSG00000070610	Wald ratio	1	0.000187277	0.000451223	0.678111	-0.00069712	0.00107167	1.00019	0.999303	1.00107
fxkEWc	vp2gYX	Bladder cancer	PPM1K-DT_ENSG00000246375	Wald ratio	1	-5.06654e-05	0.000154495	0.742956	-0.000353476	0.000252146	0.999949	0.999647	1.00025
g0q32L	vp2gYX	Bladder cancer	TMEM50B_ENSG00000142188	Wald ratio	1	-7.35202e-05	0.000278084	0.791486	-0.000618565	0.000471525	0.999926	0.999382	1.00047
g57rNB	vp2gYX	Bladder cancer	EPS15L1_ENSG00000127527	Wald ratio	1	-0.000172446	0.000311276	0.57958	-0.000782546	0.000437654	0.999828	0.999218	1.00044
g66o2m	vp2gYX	Bladder cancer	USP22_ENSG00000124422	Wald ratio	1	7.65998e-05	0.000384074	0.841919	-0.000676186	0.000829386	1.00008	0.999324	1.00083
GAGnrs	vp2gYX	Bladder cancer	BARD1_ENSG00000138376	Wald ratio	1	-0.000207238	0.000442386	0.63946	-0.00107431	0.000659839	0.999793	0.998926	1.00066
GbazMS	vp2gYX	Bladder cancer	ZDHHC14_ENSG00000175048	Wald ratio	1	5.78632e-05	0.000232513	0.80347	-0.000397863	0.00051359	1.00006	0.999602	1.00051
GcxPkg	vp2gYX	Bladder cancer	ZNF521_ENSG00000198795	Wald ratio	1	0.000368129	0.000393462	0.349472	-0.000403057	0.00113932	1.00037	0.999597	1.00114
GJSoRR	vp2gYX	Bladder cancer	NTNG2_ENSG00000196358	Wald ratio	1	2.74762e-05	0.000463216	0.9527	-0.000880427	0.000935379	1.00003	0.99912	1.00094
GnKaAX	vp2gYX	Bladder cancer	TTC23_ENSG00000103852	Wald ratio	1	0.000112996	0.000152527	0.458798	-0.000185957	0.000411949	1.00011	0.999814	1.00041
GNN3FB	vp2gYX	Bladder cancer	LINC01500_ENSG00000258583	Wald ratio	1	-3.83039e-05	0.000257035	0.881536	-0.000542092	0.000465484	0.999962	0.999458	1.00047
GNqYfy	vp2gYX	Bladder cancer	TOX3_ENSG00000103460	Wald ratio	1	-0.00086766	0.000531464	0.102556	-0.00190933	0.000174009	0.999133	0.998092	1.00017
gPfDEs	vp2gYX	Bladder cancer	ULK4_ENSG00000168038	Wald ratio	1	0.00026024	0.000279329	0.35151	-0.000287244	0.000807725	1.00026	0.999713	1.00081
Gq998P	vp2gYX	Bladder cancer	LTBP3_ENSG00000168056	Wald ratio	1	-0.000515702	0.000277858	0.0634555	-0.0010603	2.8901e-05	0.999484	0.99894	1.00003
GWa4uQ	vp2gYX	Bladder cancer	FBXO27_ENSG00000161243	Wald ratio	1	-0.000298323	0.000375846	0.427348	-0.00103498	0.000438335	0.999702	0.998966	1.00044
gxQz3g	vp2gYX	Bladder cancer	C1orf174_ENSG00000198912	Wald ratio	1	0.000252908	0.000240781	0.29355	-0.000219023	0.00072484	1.00025	0.999781	1.00073
gyQrnB	vp2gYX	Bladder cancer	IGHMBP2_ENSG00000132740	Wald ratio	1	-0.000272597	0.000239613	0.255263	-0.000742238	0.000197043	0.999727	0.999258	1.0002
GzkeME	vp2gYX	Bladder cancer	P2RX7_ENSG00000089041	Wald ratio	1	6.38481e-05	0.000439287	0.884439	-0.000797154	0.00092485	1.00006	0.999203	1.00093
h0IUBU	vp2gYX	Bladder cancer	ESRRG_ENSG00000196482	Wald ratio	1	-0.000214284	0.000285961	0.453648	-0.000774767	0.000346199	0.999786	0.999226	1.00035
h5ctiw	vp2gYX	Bladder cancer	MRE11_ENSG00000020922	Wald ratio	1	-6.52887e-05	0.000320038	0.838351	-0.000692563	0.000561986	0.999935	0.999308	1.00056
hDy4rf	vp2gYX	Bladder cancer	CBWD1_ENSG00000172785	Wald ratio	1	-0.000623996	0.00035895	0.0821417	-0.00132754	7.95459e-05	0.999376	0.998673	1.00008
HE2H7a	vp2gYX	Bladder cancer	TP53TG5_ENSG00000124251	Wald ratio	1	0.000550179	0.000515775	0.286106	-0.00046074	0.0015611	1.00055	0.999539	1.00156
hFORsJ	vp2gYX	Bladder cancer	GALNT6_ENSG00000139629	Wald ratio	1	0.000189486	0.000275725	0.491938	-0.000350934	0.000729906	1.00019	0.999649	1.00073
Hli4QZ	vp2gYX	Bladder cancer	MTRF1L_ENSG00000112031	Wald ratio	1	0.000283473	0.000254313	0.264996	-0.000214981	0.000781926	1.00028	0.999785	1.00078
hNC60V	vp2gYX	Bladder cancer	NPIPB13_ENSG00000198064	Wald ratio	1	-0.000376623	0.000220607	0.0877829	-0.000809013	5.57671e-05	0.999623	0.999191	1.00006
hq7i2o	vp2gYX	Bladder cancer	DCBLD2_ENSG00000057019	Wald ratio	1	-0.000104447	0.00042711	0.806809	-0.000941582	0.000732688	0.999896	0.999059	1.00073
HqAPQP	vp2gYX	Bladder cancer	ZNF347_ENSG00000197937	Wald ratio	1	0.000203404	0.00020593	0.323282	-0.000200218	0.000607027	1.0002	0.9998	1.00061
hrDK9F	vp2gYX	Bladder cancer	AC008467.1_ENSG00000249476	Wald ratio	1	0.000393814	0.000252984	0.119548	-0.000102035	0.000889662	1.00039	0.999898	1.00089
hWwfsD	vp2gYX	Bladder cancer	RHOBTB1_ENSG00000072422	Wald ratio	1	0.000232455	0.000282527	0.410638	-0.000321298	0.000786207	1.00023	0.999679	1.00079
hypdoo	vp2gYX	Bladder cancer	EPB41L2_ENSG00000079819	Wald ratio	1	0.000430398	0.000431014	0.318002	-0.000414389	0.00127519	1.00043	0.999586	1.00128
Hzfshy	vp2gYX	Bladder cancer	ADAMTS14_ENSG00000138316	Wald ratio	1	2.33768e-05	0.000223169	0.916575	-0.000414034	0.000460788	1.00002	0.999586	1.00046
i3H4dS	vp2gYX	Bladder cancer	AC034195.1_ENSG00000223727	Wald ratio	1	-4.85196e-05	0.000287254	0.865869	-0.000611537	0.000514498	0.999951	0.999389	1.00051
I7Fnwk	vp2gYX	Bladder cancer	DAAM2_ENSG00000146122	Wald ratio	1	-0.000583738	0.000496198	0.239426	-0.00155629	0.00038881	0.999416	0.998445	1.00039
I7ZuOR	vp2gYX	Bladder cancer	AC005392.1_ENSG00000227606	Wald ratio	1	0.00012705	0.000309979	0.681903	-0.000480508	0.000734609	1.00013	0.99952	1.00073
I950vC	vp2gYX	Bladder cancer	GFM1_ENSG00000168827	Wald ratio	1	-0.000259428	0.000263814	0.325422	-0.000776503	0.000257646	0.999741	0.999224	1.00026
iaD7Sb	vp2gYX	Bladder cancer	OR2L5_ENSG00000197454	Wald ratio	1	-3.89247e-05	0.000171906	0.820867	-0.00037586	0.000298011	0.999961	0.999624	1.0003
Ib7gpt	vp2gYX	Bladder cancer	NIPSNAP3A_ENSG00000136783	Wald ratio	1	0.000108941	0.000274854	0.691839	-0.000429772	0.000647654	1.00011	0.99957	1.00065
iEhySE	vp2gYX	Bladder cancer	KLRC4-KLRK1_ENSG00000255819	Wald ratio	1	-3.47988e-05	0.000216718	0.87243	-0.000459566	0.000389968	0.999965	0.999541	1.00039
if1eAR	vp2gYX	Bladder cancer	AGMO_ENSG00000187546	Wald ratio	1	-0.000138193	0.000209655	0.509802	-0.000549116	0.00027273	0.999862	0.999451	1.00027
ifPXS1	vp2gYX	Bladder cancer	PLEKHA1_ENSG00000107679	Wald ratio	1	0.000207844	0.000412283	0.61417	-0.00060023	0.00101592	1.00021	0.9994	1.00102
IHHFef	vp2gYX	Bladder cancer	SNX19_ENSG00000120451	Wald ratio	1	-6.11928e-05	0.000132569	0.644375	-0.000321029	0.000198643	0.999939	0.999679	1.0002
IHxkV4	vp2gYX	Bladder cancer	CEP70_ENSG00000114107	Wald ratio	1	-0.000139177	0.000326456	0.669869	-0.00077903	0.000500676	0.999861	0.999221	1.0005
iJUMGO	vp2gYX	Bladder cancer	NUP85_ENSG00000125450	Wald ratio	1	-0.000214303	0.000253509	0.397917	-0.00071118	0.000282574	0.999786	0.999289	1.00028
il32PY	vp2gYX	Bladder cancer	LRRIQ3_ENSG00000162620	Wald ratio	1	-4.13609e-05	0.000264439	0.87571	-0.000559662	0.00047694	0.999959	0.99944	1.00048
Ilb2V6	vp2gYX	Bladder cancer	SEC23A_ENSG00000100934	Wald ratio	1	-0.000612837	0.000420704	0.145201	-0.00143742	0.000211743	0.999387	0.998564	1.00021
IpiXhN	vp2gYX	Bladder cancer	ZSCAN31_ENSG00000235109	Wald ratio	1	3.07732e-05	0.000211988	0.884581	-0.000384723	0.000446269	1.00003	0.999615	1.00045
IpqG0Y	vp2gYX	Bladder cancer	CAST_ENSG00000153113	Wald ratio	1	6.98433e-05	0.000279015	0.802339	-0.000477027	0.000616713	1.00007	0.999523	1.00062
IQg7DT	vp2gYX	Bladder cancer	METTL21A_ENSG00000144401	Wald ratio	1	-0.000261776	0.000443941	0.555416	-0.0011319	0.000608348	0.999738	0.998869	1.00061
IqkPbg	vp2gYX	Bladder cancer	ADCY3_ENSG00000138031	Wald ratio	1	0.000419292	0.000338905	0.216015	-0.000244962	0.00108355	1.00042	0.999755	1.00108
IqQUrW	vp2gYX	Bladder cancer	FAM171B_ENSG00000144369	Wald ratio	1	-3.41886e-05	0.00012496	0.784396	-0.000279111	0.000210734	0.999966	0.999721	1.00021
iqXeSE	vp2gYX	Bladder cancer	STK31_ENSG00000196335	Wald ratio	1	0.000214038	0.000149324	0.15175	-7.86375e-05	0.000506714	1.00021	0.999921	1.00051
ISYnum	vp2gYX	Bladder cancer	ZNF334_ENSG00000198185	Wald ratio	1	4.13761e-05	0.000207976	0.842305	-0.000366257	0.000449009	1.00004	0.999634	1.00045
ivsnCK	vp2gYX	Bladder cancer	OR2M4_ENSG00000171180	Wald ratio	1	-4.19649e-05	0.000185333	0.820867	-0.000405217	0.000321287	0.999958	0.999595	1.00032
J3oPa9	vp2gYX	Bladder cancer	GATD3A_ENSG00000160221	Wald ratio	1	-1.96309e-05	0.000199664	0.921679	-0.000410972	0.000371711	0.99998	0.999589	1.00037
J50k3y	vp2gYX	Bladder cancer	ADGRE2_ENSG00000127507	Wald ratio	1	4.74545e-05	0.000210507	0.821645	-0.00036514	0.000460049	1.00005	0.999635	1.00046
J5MR9p	vp2gYX	Bladder cancer	MICAL3_ENSG00000243156	Wald ratio	1	0.000597002	0.000384271	0.120281	-0.000156169	0.00135017	1.0006	0.999844	1.00135
J6nrUO	vp2gYX	Bladder cancer	TMEM181_ENSG00000146433	Wald ratio	1	-0.000202178	0.000218822	0.355518	-0.000631069	0.000226713	0.999798	0.999369	1.00023
J7ThyV	vp2gYX	Bladder cancer	PDE1C_ENSG00000154678	Wald ratio	1	-9.59266e-05	0.000441128	0.827852	-0.000960538	0.000768684	0.999904	0.99904	1.00077
JAQzT4	vp2gYX	Bladder cancer	CADM2_ENSG00000175161	Wald ratio	1	-8.91488e-05	0.000268388	0.739766	-0.00061519	0.000436893	0.999911	0.999385	1.00044
jdIPDv	vp2gYX	Bladder cancer	ANLN_ENSG00000011426	Wald ratio	1	0.000547196	0.000405741	0.177455	-0.000248056	0.00134245	1.00055	0.999752	1.00134
je9awZ	vp2gYX	Bladder cancer	STX6_ENSG00000135823	Wald ratio	1	-0.000122971	0.00019408	0.526333	-0.000503367	0.000257425	0.999877	0.999497	1.00026
jFBkWd	vp2gYX	Bladder cancer	DDX59_ENSG00000118197	Wald ratio	1	0.000260053	0.000310984	0.403028	-0.000349476	0.000869583	1.00026	0.999651	1.00087
JIfluR	vp2gYX	Bladder cancer	DHCR24_ENSG00000116133	Wald ratio	1	-0.000764724	0.000420155	0.0687436	-0.00158823	5.87791e-05	0.999236	0.998413	1.00006
jIKhoS	vp2gYX	Bladder cancer	AC109492.1_ENSG00000249061	Wald ratio	1	-9.26383e-05	0.000313789	0.767822	-0.000707665	0.000522389	0.999907	0.999293	1.00052
jilfSr	vp2gYX	Bladder cancer	MEIS1_ENSG00000143995	Wald ratio	1	-3.81982e-05	0.000342364	0.911163	-0.000709232	0.000632836	0.999962	0.999291	1.00063
jJzPed	vp2gYX	Bladder cancer	DCUN1D2_ENSG00000150401	Wald ratio	1	0.000437777	0.000423977	0.301815	-0.000393217	0.00126877	1.00044	0.999607	1.00127
Jk5Jji	vp2gYX	Bladder cancer	APOLD1_ENSG00000178878	Wald ratio	1	-0.000425823	0.000320833	0.184429	-0.00105466	0.00020301	0.999574	0.998946	1.0002
Jl8Fcx	vp2gYX	Bladder cancer	MTUS1_ENSG00000129422	Wald ratio	1	-0.000286622	0.000179057	0.109436	-0.000637573	6.43291e-05	0.999713	0.999363	1.00006
JLO1jt	vp2gYX	Bladder cancer	DIS3L2_ENSG00000144535	Wald ratio	1	9.69291e-05	0.000261349	0.710727	-0.000415315	0.000609173	1.0001	0.999585	1.00061
jLQaXi	vp2gYX	Bladder cancer	ZNF577_ENSG00000161551	Wald ratio	1	-0.000423849	0.000342366	0.215715	-0.00109489	0.000247187	0.999576	0.998906	1.00025
JoPke7	vp2gYX	Bladder cancer	SYNDIG1_ENSG00000101463	Wald ratio	1	2.25598e-05	0.000462013	0.961055	-0.000882986	0.000928106	1.00002	0.999117	1.00093
jPcQg2	vp2gYX	Bladder cancer	AC009495.1_ENSG00000229195	Wald ratio	1	-3.86339e-05	0.000302093	0.898238	-0.000630737	0.000553469	0.999961	0.999369	1.00055
jq2xp2	vp2gYX	Bladder cancer	SLFN5_ENSG00000166750	Wald ratio	1	0.000256887	0.000332906	0.440321	-0.000395609	0.000909383	1.00026	0.999604	1.00091
JRovjW	vp2gYX	Bladder cancer	PDE4B_ENSG00000184588	Wald ratio	1	-0.00103088	0.000839827	0.219639	-0.00267694	0.000615183	0.99897	0.997327	1.00062
jslSoK	vp2gYX	Bladder cancer	NDST1_ENSG00000070614	Wald ratio	1	-0.0006009	0.000584134	0.303619	-0.0017458	0.000544002	0.999399	0.998256	1.00054
jSU4zu	vp2gYX	Bladder cancer	SYS1-DBNDD2_ENSG00000254806	Wald ratio	1	0.000554516	0.00051984	0.286106	-0.000464371	0.0015734	1.00055	0.999536	1.00157
JTI4xU	vp2gYX	Bladder cancer	AC104041.1_ENSG00000259692	Wald ratio	1	0.000122284	0.000298843	0.682399	-0.000463449	0.000708016	1.00012	0.999537	1.00071
Jvp8dK	vp2gYX	Bladder cancer	PSD3_ENSG00000156011	Wald ratio	1	0.000235904	0.000261385	0.366782	-0.00027641	0.000748218	1.00024	0.999724	1.00075
JXZcm7	vp2gYX	Bladder cancer	SAP30_ENSG00000164105	Wald ratio	1	-0.000219847	0.000457815	0.631079	-0.00111716	0.000677471	0.99978	0.998883	1.00068
Jzr2Td	vp2gYX	Bladder cancer	AC007513.1_ENSG00000258272	Wald ratio	1	-1.76741e-06	0.00025091	0.99438	-0.000493552	0.000490017	0.999998	0.999507	1.00049
K16qhc	vp2gYX	Bladder cancer	HTR4_ENSG00000164270	Wald ratio	1	0.000225493	0.000235829	0.338984	-0.000236731	0.000687717	1.00023	0.999763	1.00069
k4N6W5	vp2gYX	Bladder cancer	LINC02210-CRHR1_ENSG00000263715	Wald ratio	1	8.93036e-05	0.000176014	0.611899	-0.000255685	0.000434292	1.00009	0.999744	1.00043
k8VqVI	vp2gYX	Bladder cancer	TRPM1_ENSG00000134160	Wald ratio	1	2.47963e-05	0.000131893	0.850874	-0.000233714	0.000283306	1.00002	0.999766	1.00028
kc9fI5	vp2gYX	Bladder cancer	ECI2_ENSG00000198721	Wald ratio	1	8.79845e-05	0.000249975	0.724859	-0.000401967	0.000577936	1.00009	0.999598	1.00058
kcBYT5	vp2gYX	Bladder cancer	TRIM9_ENSG00000100505	Wald ratio	1	-0.000299579	0.000580378	0.605729	-0.00143712	0.000837962	0.9997	0.998564	1.00084
kDuK36	vp2gYX	Bladder cancer	EVI5L_ENSG00000142459	Wald ratio	1	-3.08204e-05	0.000299615	0.918069	-0.000618066	0.000556425	0.999969	0.999382	1.00056
kFs2iP	vp2gYX	Bladder cancer	SERHL2_ENSG00000183569	Wald ratio	1	-0.000324626	0.000287612	0.259026	-0.000888345	0.000239093	0.999675	0.999112	1.00024
KiD9XE	vp2gYX	Bladder cancer	PREX2_ENSG00000046889	Wald ratio	1	0.000405643	0.000287494	0.158257	-0.000157846	0.000969132	1.00041	0.999842	1.00097
KIV9St	vp2gYX	Bladder cancer	CLIP4_ENSG00000115295	Wald ratio	1	0.00020071	0.000344522	0.560179	-0.000474554	0.000875974	1.0002	0.999526	1.00088
KKPunq	vp2gYX	Bladder cancer	LINC01740_ENSG00000228067	Wald ratio	1	-6.33207e-05	0.00019052	0.739619	-0.000436739	0.000310098	0.999937	0.999563	1.00031
kOd0m6	vp2gYX	Bladder cancer	MAPRE2_ENSG00000166974	Wald ratio	1	7.59757e-05	0.000348877	0.827606	-0.000607823	0.000759774	1.00008	0.999392	1.00076
kPndWP	vp2gYX	Bladder cancer	AC147651.1_ENSG00000223855	Wald ratio	1	0.00041615	0.000247112	0.0921713	-6.81896e-05	0.000900489	1.00042	0.999932	1.0009
kqZLmi	vp2gYX	Bladder cancer	SUPT3H_ENSG00000196284	Wald ratio	1	9.44901e-05	0.000375326	0.801231	-0.000641149	0.000830129	1.00009	0.999359	1.00083
KvAK11	vp2gYX	Bladder cancer	USP37_ENSG00000135913	Wald ratio	1	-0.000460617	0.000356803	0.196718	-0.00115995	0.000238716	0.999539	0.998841	1.00024
kWHNCj	vp2gYX	Bladder cancer	DOP1A_ENSG00000083097	Wald ratio	1	-0.000207162	0.000361343	0.566434	-0.000915394	0.00050107	0.999793	0.999085	1.0005
KZDY6r	vp2gYX	Bladder cancer	TRIM66_ENSG00000166436	Wald ratio	1	-0.000107501	0.000458938	0.8148	-0.00100702	0.000792017	0.999893	0.998993	1.00079
KZJ7GH	vp2gYX	Bladder cancer	SHISA4_ENSG00000198892	Wald ratio	1	0.000502803	0.000338346	0.137263	-0.000160355	0.00116596	1.0005	0.99984	1.00117
l2FjVt	vp2gYX	Bladder cancer	AGO2_ENSG00000123908	Wald ratio	1	0.000804662	0.000672329	0.231373	-0.000513102	0.00212243	1.0008	0.999487	1.00212
L5cjwh	vp2gYX	Bladder cancer	MCF2L_ENSG00000126217	Wald ratio	1	0.000134374	0.000127193	0.29076	-0.000114925	0.000383672	1.00013	0.999885	1.00038
lbmW4v	vp2gYX	Bladder cancer	KIF6_ENSG00000164627	Wald ratio	1	0.000182374	0.000629366	0.771988	-0.00105118	0.00141593	1.00018	0.998949	1.00142
LjD3kl	vp2gYX	Bladder cancer	KIAA0930_ENSG00000100364	Wald ratio	1	0.000257041	0.000233666	0.271317	-0.000200945	0.000715027	1.00026	0.999799	1.00072
LKHo6J	vp2gYX	Bladder cancer	C1QTNF7_ENSG00000163145	Wald ratio	1	-0.000283146	0.000296919	0.340279	-0.000865109	0.000298816	0.999717	0.999135	1.0003
lop0q8	vp2gYX	Bladder cancer	KDELC2_ENSG00000178202	Wald ratio	1	-6.23064e-05	0.00026621	0.814947	-0.000584078	0.000459466	0.999938	0.999416	1.00046
LOtksy	vp2gYX	Bladder cancer	SH3RF1_ENSG00000154447	Wald ratio	1	0.000358929	0.00020323	0.0773756	-3.94021e-05	0.000757259	1.00036	0.999961	1.00076
lpVim8	vp2gYX	Bladder cancer	CD82_ENSG00000085117	Wald ratio	1	-0.000221696	0.000280446	0.42923	-0.00077137	0.000327979	0.999778	0.999229	1.00033
LQSssE	vp2gYX	Bladder cancer	CEP128_ENSG00000100629	Wald ratio	1	0.000298155	0.000327072	0.361985	-0.000342906	0.000939215	1.0003	0.999657	1.00094
lrUtGe	vp2gYX	Bladder cancer	LPIN1_ENSG00000134324	Wald ratio	1	-0.00033116	0.000213056	0.120106	-0.00074875	8.64311e-05	0.999669	0.999252	1.00009
lTJD0y	vp2gYX	Bladder cancer	PPHLN1_ENSG00000134283	Wald ratio	1	-0.00012071	0.000271156	0.656199	-0.000652176	0.000410756	0.999879	0.999348	1.00041
LuAGCW	vp2gYX	Bladder cancer	ZCCHC17_ENSG00000121766	Wald ratio	1	-0.000520839	0.000342037	0.127819	-0.00119123	0.000149553	0.999479	0.998809	1.00015
LwTiNQ	vp2gYX	Bladder cancer	LINC00706_ENSG00000281186	Wald ratio	1	-0.000217202	0.000414296	0.600092	-0.00102922	0.000594818	0.999783	0.998971	1.00059
lXQshv	vp2gYX	Bladder cancer	TRAPPC13_ENSG00000113597	Wald ratio	1	-0.000431086	0.000495132	0.383945	-0.00140154	0.000539371	0.999569	0.998599	1.00054
lYMmsf	vp2gYX	Bladder cancer	AC114485.1_ENSG00000233359	Wald ratio	1	-6.12372e-05	0.0001336	0.646693	-0.000323094	0.000200619	0.999939	0.999677	1.0002
m0ZUuK	vp2gYX	Bladder cancer	LCA5L_ENSG00000157578	Wald ratio	1	-0.000244424	0.000448821	0.586035	-0.00112411	0.000635266	0.999756	0.998877	1.00064
M1EVjN	vp2gYX	Bladder cancer	TTC7B_ENSG00000165914	Wald ratio	1	0.000284952	0.000301857	0.345171	-0.000306688	0.000876591	1.00028	0.999693	1.00088
m3ZybS	vp2gYX	Bladder cancer	USP40_ENSG00000085982	Wald ratio	1	-0.000175808	0.000330486	0.594747	-0.00082356	0.000471943	0.999824	0.999177	1.00047
M6LGYR	vp2gYX	Bladder cancer	LRIG1_ENSG00000144749	Wald ratio	1	-0.000355505	0.000306745	0.246472	-0.000956725	0.000245714	0.999645	0.999044	1.00025
M6wlrC	vp2gYX	Bladder cancer	AC093423.3_ENSG00000271949	Wald ratio	1	-0.0002958	0.000273712	0.279832	-0.000832277	0.000240676	0.999704	0.999168	1.00024
MadQ7E	vp2gYX	Bladder cancer	AC006504.5_ENSG00000267575	Wald ratio	1	-0.000535394	0.00029377	0.0683803	-0.00111118	4.03957e-05	0.999465	0.998889	1.00004
MeidRM	vp2gYX	Bladder cancer	SETD4_ENSG00000185917	Wald ratio	1	-3.62289e-05	0.00023947	0.879749	-0.00050559	0.000433132	0.999964	0.999495	1.00043
MfHXqA	vp2gYX	Bladder cancer	ARL17B_ENSG00000228696	Wald ratio	1	6.0773e-05	0.000119782	0.611899	-0.000173999	0.000295545	1.00006	0.999826	1.0003
MFlA5d	vp2gYX	Bladder cancer	APP_ENSG00000142192	Wald ratio	1	2.55671e-05	0.000337405	0.939598	-0.000635746	0.00068688	1.00003	0.999364	1.00069
MFYmyD	vp2gYX	Bladder cancer	STARD7_ENSG00000084090	Wald ratio	1	-0.000750667	0.000561823	0.181508	-0.00185184	0.000350506	0.99925	0.99815	1.00035
mGZC1s	vp2gYX	Bladder cancer	AP006621.3_ENSG00000255284	Wald ratio	1	-0.000371973	0.000309591	0.229559	-0.000978772	0.000234826	0.999628	0.999022	1.00023
MN5dmb	vp2gYX	Bladder cancer	CYBRD1_ENSG00000071967	Wald ratio	1	5.19872e-05	0.000165595	0.753566	-0.00027258	0.000376554	1.00005	0.999727	1.00038
MoJIBL	vp2gYX	Bladder cancer	LINC01470_ENSG00000249484	Wald ratio	1	-0.00036871	0.000245892	0.13375	-0.000850659	0.000113239	0.999631	0.99915	1.00011
mp1u13	vp2gYX	Bladder cancer	KCNAB1_ENSG00000169282	Wald ratio	1	0.000289589	0.000355148	0.414841	-0.000406501	0.000985679	1.00029	0.999594	1.00099
muM48L	vp2gYX	Bladder cancer	BACE2_ENSG00000182240	Wald ratio	1	-0.00017921	0.000225827	0.427444	-0.000621831	0.000263411	0.999821	0.999378	1.00026
mw5uOh	vp2gYX	Bladder cancer	NKAIN1_ENSG00000084628	Wald ratio	1	-0.000194838	0.00012795	0.127819	-0.00044562	5.59452e-05	0.999805	0.999554	1.00006
n4S3wV	vp2gYX	Bladder cancer	CD55_ENSG00000196352	Wald ratio	1	-2.12932e-05	0.000361714	0.953058	-0.000730254	0.000687667	0.999979	0.99927	1.00069
nBWVd3	vp2gYX	Bladder cancer	ABCC5_ENSG00000114770	Wald ratio	1	-0.000116289	0.00024272	0.631864	-0.00059202	0.000359443	0.999884	0.999408	1.00036
ncYbCV	vp2gYX	Bladder cancer	LDLRAP1_ENSG00000157978	Wald ratio	1	-4.34425e-05	0.000185025	0.814369	-0.000406091	0.000319206	0.999957	0.999594	1.00032
nE3KhR	vp2gYX	Bladder cancer	STEAP1B_ENSG00000105889	Wald ratio	1	-0.000332898	0.00029128	0.253089	-0.000903806	0.000238011	0.999667	0.999097	1.00024
neB0bz	vp2gYX	Bladder cancer	AP000755.1_ENSG00000255015	Wald ratio	1	-0.000405445	0.000241934	0.0937673	-0.000879634	6.87451e-05	0.999595	0.999121	1.00007
nEFVbr	vp2gYX	Bladder cancer	CCDC77_ENSG00000120647	Wald ratio	1	0.000209122	0.000183014	0.253184	-0.000149587	0.00056783	1.00021	0.99985	1.00057
nghquD	vp2gYX	Bladder cancer	C2orf74_ENSG00000237651	Wald ratio	1	-7.50131e-05	0.000231515	0.745931	-0.000528783	0.000378756	0.999925	0.999471	1.00038
NHXyWH	vp2gYX	Bladder cancer	ADAM10_ENSG00000137845	Wald ratio	1	-9.35058e-05	0.000346581	0.787318	-0.000772804	0.000585792	0.999906	0.999227	1.00059
nkCbeO	vp2gYX	Bladder cancer	OR2L2_ENSG00000203663	Wald ratio	1	-3.80046e-05	0.000167843	0.820867	-0.000366976	0.000290967	0.999962	0.999633	1.00029
NMvuZ4	vp2gYX	Bladder cancer	AATF_ENSG00000275700	Wald ratio	1	-0.000137959	0.000199781	0.489849	-0.000529529	0.000253612	0.999862	0.999471	1.00025
NN4LfQ	vp2gYX	Bladder cancer	WDR6_ENSG00000178252	Wald ratio	1	-0.000153911	0.000322014	0.632674	-0.000785058	0.000477235	0.999846	0.999215	1.00048
Nq4Gn2	vp2gYX	Bladder cancer	MN1_ENSG00000169184	Wald ratio	1	-5.62358e-05	0.000272842	0.836704	-0.000591006	0.000478534	0.999944	0.999409	1.00048
nRjGEY	vp2gYX	Bladder cancer	ODF2L_ENSG00000122417	Wald ratio	1	-0.000278675	0.000289368	0.335524	-0.000845835	0.000288486	0.999721	0.999155	1.00029
nRlQ1w	vp2gYX	Bladder cancer	COQ8A_ENSG00000163050	Wald ratio	1	0.000613173	0.000408844	0.133673	-0.000188161	0.00141451	1.00061	0.999812	1.00142
NtdzbY	vp2gYX	Bladder cancer	LINC00115_ENSG00000225880	Wald ratio	1	0.000411226	0.000329833	0.212481	-0.000235246	0.0010577	1.00041	0.999765	1.00106
nyZxEo	vp2gYX	Bladder cancer	WFIKKN1_ENSG00000127578	Wald ratio	1	-0.000462519	0.000283202	0.102432	-0.00101759	9.25567e-05	0.999538	0.998983	1.00009
NZeJmF	vp2gYX	Bladder cancer	KDM4B_ENSG00000127663	Wald ratio	1	-0.000400273	0.000415451	0.335314	-0.00121456	0.000414011	0.9996	0.998786	1.00041
NzPPvs	vp2gYX	Bladder cancer	CSGALNACT2_ENSG00000169826	Wald ratio	1	0.000151749	0.000220387	0.491102	-0.000280209	0.000583707	1.00015	0.99972	1.00058
o8dZ7u	vp2gYX	Bladder cancer	ANKRD36_ENSG00000135976	Wald ratio	1	0.000444221	0.000264815	0.0934491	-7.48161e-05	0.000963259	1.00044	0.999925	1.00096
o99S0v	vp2gYX	Bladder cancer	PRPSAP2_ENSG00000141127	Wald ratio	1	-0.000172047	0.000205135	0.401638	-0.000574111	0.000230018	0.999828	0.999426	1.00023
Ob4lcN	vp2gYX	Bladder cancer	ARHGEF7_ENSG00000102606	Wald ratio	1	0.000198939	0.000362115	0.582745	-0.000510808	0.000908685	1.0002	0.999489	1.00091
Obrpuq	vp2gYX	Bladder cancer	ITPR2_ENSG00000123104	Wald ratio	1	-8.06513e-05	0.000243838	0.740828	-0.000558574	0.000397272	0.999919	0.999442	1.0004
obZ1hL	vp2gYX	Bladder cancer	SUMF1_ENSG00000144455	Wald ratio	1	-4.31744e-05	0.000255609	0.865869	-0.000544168	0.000457819	0.999957	0.999456	1.00046
Oc4VIk	vp2gYX	Bladder cancer	CPM_ENSG00000135678	Wald ratio	1	0.000311501	0.000225251	0.166694	-0.000129992	0.000752994	1.00031	0.99987	1.00075
oCE47o	vp2gYX	Bladder cancer	NECTIN3_ENSG00000177707	Wald ratio	1	-0.000252498	0.000223828	0.259283	-0.000691201	0.000186205	0.999748	0.999309	1.00019
OcNzwV	vp2gYX	Bladder cancer	NMNAT3_ENSG00000163864	Wald ratio	1	0.000173958	0.000339788	0.60868	-0.000492027	0.000839942	1.00017	0.999508	1.00084
OGP1HI	vp2gYX	Bladder cancer	RUNX2_ENSG00000124813	Wald ratio	1	3.30655e-05	0.00013134	0.801231	-0.000224361	0.000290493	1.00003	0.999776	1.00029
OhxjX8	vp2gYX	Bladder cancer	RGPD8_ENSG00000169629	Wald ratio	1	-8.03895e-05	0.000237886	0.735413	-0.000546645	0.000385866	0.99992	0.999454	1.00039
Ohz4f2	vp2gYX	Bladder cancer	ARSA_ENSG00000100299	Wald ratio	1	-0.000174172	0.000355815	0.624486	-0.000871569	0.000523225	0.999826	0.999129	1.00052
Oj03jc	vp2gYX	Bladder cancer	PPFIBP1_ENSG00000110841	Wald ratio	1	0.00015081	0.000151644	0.31998	-0.000146412	0.000448032	1.00015	0.999854	1.00045
oK5vp6	vp2gYX	Bladder cancer	FIGNL1_ENSG00000132436	Wald ratio	1	-0.000262126	0.000304106	0.388711	-0.000858173	0.000333921	0.999738	0.999142	1.00033
ONEfdv	vp2gYX	Bladder cancer	EGLN1_ENSG00000135766	Wald ratio	1	-0.000160334	0.000313471	0.609015	-0.000774737	0.000454068	0.99984	0.999226	1.00045
ooaCWM	vp2gYX	Bladder cancer	MATN2_ENSG00000132561	Wald ratio	1	-0.000387864	0.000297718	0.192646	-0.000971391	0.000195663	0.999612	0.999029	1.0002
OOAmqU	vp2gYX	Bladder cancer	LURAP1L_ENSG00000153714	Wald ratio	1	2.28063e-05	0.000138278	0.868999	-0.000248219	0.000293832	1.00002	0.999752	1.00029
oSpvll	vp2gYX	Bladder cancer	AL591806.3_ENSG00000270149	Wald ratio	1	-0.000296174	0.000177791	0.0957423	-0.000644644	5.22962e-05	0.999704	0.999356	1.00005
OT2xHl	vp2gYX	Bladder cancer	PM20D1_ENSG00000162877	Wald ratio	1	0.000297423	0.000208985	0.154684	-0.000112188	0.000707034	1.0003	0.999888	1.00071
OteIgD	vp2gYX	Bladder cancer	CAPN9_ENSG00000135773	Inverse variance weighted	2	0.000129668	0.000292923	0.658004	-0.000444461	0.000703797	1.00013	0.999556	1.0007
OTNQ9E	vp2gYX	Bladder cancer	TTC12_ENSG00000149292	Wald ratio	1	0.000530815	0.000412209	0.197839	-0.000277115	0.00133874	1.00053	0.999723	1.00134
ou8W1k	vp2gYX	Bladder cancer	UTP23_ENSG00000147679	Wald ratio	1	0.000230238	0.000660192	0.727282	-0.00106374	0.00152421	1.00023	0.998937	1.00153
oUpO6b	vp2gYX	Bladder cancer	PPFIA1_ENSG00000131626	Wald ratio	1	-0.000181543	0.000312142	0.560833	-0.000793342	0.000430255	0.999818	0.999207	1.00043
OV2GmK	vp2gYX	Bladder cancer	TKT_ENSG00000163931	Wald ratio	1	-0.000458919	0.000511683	0.369783	-0.00146182	0.000543981	0.999541	0.998539	1.00054
oVhZOx	vp2gYX	Bladder cancer	GLS_ENSG00000115419	Wald ratio	1	-0.000490206	0.000486814	0.31395	-0.00144436	0.00046395	0.99951	0.998557	1.00046
OXEu21	vp2gYX	Bladder cancer	MMP24_ENSG00000125966	Wald ratio	1	8.13675e-05	0.000568763	0.886242	-0.00103341	0.00119614	1.00008	0.998967	1.0012
oYfXlJ	vp2gYX	Bladder cancer	FNDC7_ENSG00000143107	Wald ratio	1	-0.000145009	0.000203891	0.476956	-0.000544634	0.000254617	0.999855	0.999456	1.00025
ozmFTl	vp2gYX	Bladder cancer	ZNF429_ENSG00000197013	Wald ratio	1	0.000359722	0.000208317	0.0842026	-4.85783e-05	0.000768023	1.00036	0.999951	1.00077
P22ZV1	vp2gYX	Bladder cancer	ATP5MC2_ENSG00000135390	Wald ratio	1	-0.000715853	0.000657113	0.275981	-0.00200379	0.000572088	0.999284	0.997998	1.00057
p6n8bo	vp2gYX	Bladder cancer	SRD5A3_ENSG00000128039	Wald ratio	1	5.11275e-05	0.000348384	0.883325	-0.000631706	0.000733961	1.00005	0.999368	1.00073
PaRwS4	vp2gYX	Bladder cancer	PICALM_ENSG00000073921	Wald ratio	1	-0.000372977	0.000669042	0.5772	-0.0016843	0.000938346	0.999627	0.998317	1.00094
pHPKgn	vp2gYX	Bladder cancer	NUP43_ENSG00000120253	Wald ratio	1	-0.000326749	0.000299796	0.275756	-0.000914349	0.000260852	0.999673	0.999086	1.00026
PI3cyf	vp2gYX	Bladder cancer	RAB6C_ENSG00000222014	Wald ratio	1	-1.4647e-05	0.000186234	0.937312	-0.000379665	0.000350371	0.999985	0.99962	1.00035
pjZUnu	vp2gYX	Bladder cancer	LINC00940_ENSG00000235049	Wald ratio	1	-9.76054e-05	0.000298385	0.743583	-0.00068244	0.000487229	0.999902	0.999318	1.00049
PKX4jg	vp2gYX	Bladder cancer	ITGB3BP_ENSG00000142856	Wald ratio	1	-0.000115894	0.000182632	0.525704	-0.000473852	0.000242064	0.999884	0.999526	1.00024
plFO4g	vp2gYX	Bladder cancer	COLGALT2_ENSG00000198756	Wald ratio	1	-0.000301585	0.000416555	0.469067	-0.00111803	0.000514863	0.999698	0.998883	1.00051
pLl9vc	vp2gYX	Bladder cancer	AC022294.1_ENSG00000241231	Wald ratio	1	-9.76732e-05	0.000275978	0.723402	-0.000638591	0.000443245	0.999902	0.999362	1.00044
PNcVgO	vp2gYX	Bladder cancer	SMUG1_ENSG00000123415	Wald ratio	1	-0.000198783	0.000337926	0.556368	-0.000861118	0.000463552	0.999801	0.999139	1.00046
PNxJha	vp2gYX	Bladder cancer	HES6_ENSG00000144485	Wald ratio	1	0.000360853	0.000290786	0.214622	-0.000209089	0.000930794	1.00036	0.999791	1.00093
PsxtoU	vp2gYX	Bladder cancer	ERICH2_ENSG00000204334	Wald ratio	1	5.0714e-05	0.00026733	0.84954	-0.000473253	0.000574681	1.00005	0.999527	1.00057
PTBOhA	vp2gYX	Bladder cancer	AC110285.2_ENSG00000262877	Wald ratio	1	-0.000117773	0.000202542	0.560921	-0.000514756	0.00027921	0.999882	0.999485	1.00028
ptdRSB	vp2gYX	Bladder cancer	TST_ENSG00000128311	Wald ratio	1	0.000300356	0.000300199	0.317057	-0.000288033	0.000888746	1.0003	0.999712	1.00089
PvS8Qy	vp2gYX	Bladder cancer	DSCC1_ENSG00000136982	Wald ratio	1	-0.000102967	0.000265098	0.697713	-0.000622559	0.000416626	0.999897	0.999378	1.00042
Pwe8b3	vp2gYX	Bladder cancer	HAGH_ENSG00000063854	Wald ratio	1	-0.000428888	0.000361252	0.235139	-0.00113694	0.000279167	0.999571	0.998864	1.00028
pXZ80U	vp2gYX	Bladder cancer	SEPT12_ENSG00000140623	Wald ratio	1	0.000303936	0.000228079	0.182666	-0.000143099	0.000750971	1.0003	0.999857	1.00075
q45dKg	vp2gYX	Bladder cancer	MPPE1_ENSG00000154889	Wald ratio	1	-0.000222789	0.000203934	0.274635	-0.0006225	0.000176923	0.999777	0.999378	1.00018
q4Ebn1	vp2gYX	Bladder cancer	PLGLB2_ENSG00000125551	Wald ratio	1	0.00026851	0.000254394	0.291201	-0.000230102	0.000767123	1.00027	0.99977	1.00077
qbrIIH	vp2gYX	Bladder cancer	CHURC1-FNTB_ENSG00000125954	Wald ratio	1	-0.000333052	0.000434644	0.443519	-0.00118495	0.00051885	0.999667	0.998816	1.00052
QBzx20	vp2gYX	Bladder cancer	TNS2_ENSG00000111077	Wald ratio	1	0.000579906	0.000536974	0.280164	-0.000472564	0.00163238	1.00058	0.999528	1.00163
qC4QFM	vp2gYX	Bladder cancer	LINC00320_ENSG00000224924	Wald ratio	1	-0.000223817	0.000485872	0.64505	-0.00117613	0.000728493	0.999776	0.998825	1.00073
QDeagI	vp2gYX	Bladder cancer	TAF1C_ENSG00000103168	Wald ratio	1	8.04985e-05	0.000237637	0.734801	-0.000385269	0.000546266	1.00008	0.999615	1.00055
QfjDeQ	vp2gYX	Bladder cancer	CHRM5_ENSG00000184984	Wald ratio	1	-3.37084e-05	0.000135856	0.804043	-0.000299986	0.000232569	0.999966	0.9997	1.00023
qIPZRe	vp2gYX	Bladder cancer	AC005304.3_ENSG00000266744	Wald ratio	1	-0.000117354	0.00028831	0.683978	-0.000682441	0.000447733	0.999883	0.999318	1.00045
QLRFnE	vp2gYX	Bladder cancer	ARNT_ENSG00000143437	Wald ratio	1	-0.000453725	0.000333963	0.174271	-0.00110829	0.000200843	0.999546	0.998892	1.0002
qlwycs	vp2gYX	Bladder cancer	COL14A1_ENSG00000187955	Wald ratio	1	1.91417e-05	0.000241781	0.936898	-0.000454748	0.000493032	1.00002	0.999545	1.00049
QMR2O1	vp2gYX	Bladder cancer	YBEY_ENSG00000182362	Wald ratio	1	0.000393919	0.000425538	0.354604	-0.000440136	0.00122797	1.00039	0.99956	1.00123
QNfU0x	vp2gYX	Bladder cancer	H2AFY2_ENSG00000099284	Wald ratio	1	-0.000190054	0.000294289	0.518405	-0.00076686	0.000386753	0.99981	0.999233	1.00039
QOK9lE	vp2gYX	Bladder cancer	MTHFR_ENSG00000177000	Wald ratio	1	-0.000139939	0.000331125	0.672575	-0.000788943	0.000509066	0.99986	0.999211	1.00051
QQvISD	vp2gYX	Bladder cancer	OR2L13_ENSG00000196071	Wald ratio	1	-4.24105e-05	0.000187301	0.820867	-0.00040952	0.000324699	0.999958	0.999591	1.00032
Qs2coc	vp2gYX	Bladder cancer	ZNF534_ENSG00000198633	Wald ratio	1	0.000222529	0.000250138	0.373667	-0.000267741	0.000712798	1.00022	0.999732	1.00071
QuKbj8	vp2gYX	Bladder cancer	GTF2H2_ENSG00000145736	Wald ratio	1	1.49361e-05	0.000181084	0.934264	-0.000339988	0.000369861	1.00001	0.99966	1.00037
QuVE3W	vp2gYX	Bladder cancer	CEP164_ENSG00000110274	Wald ratio	1	-0.000340392	0.000415644	0.412815	-0.00115505	0.000474271	0.99966	0.998846	1.00047
QZcKqm	vp2gYX	Bladder cancer	MSH4_ENSG00000057468	Wald ratio	1	-0.000226285	0.000235079	0.335754	-0.00068704	0.00023447	0.999774	0.999313	1.00023
qzJ5f9	vp2gYX	Bladder cancer	PLA2G12A_ENSG00000123739	Wald ratio	1	0.000150684	0.000399321	0.705914	-0.000631986	0.000933353	1.00015	0.999368	1.00093
R0j6pm	vp2gYX	Bladder cancer	ZNF600_ENSG00000189190	Wald ratio	1	4.4246e-05	0.000225194	0.844235	-0.000397133	0.000485625	1.00004	0.999603	1.00049
r12yiG	vp2gYX	Bladder cancer	MAGI2_ENSG00000187391	Wald ratio	1	0.000135799	0.000504918	0.787966	-0.000853839	0.00112544	1.00014	0.999147	1.00113
R2EQA0	vp2gYX	Bladder cancer	MYH11_ENSG00000133392	Wald ratio	1	0.000267559	0.000294416	0.363468	-0.000309497	0.000844614	1.00027	0.999691	1.00084
R557Jh	vp2gYX	Bladder cancer	NSUN2_ENSG00000037474	Wald ratio	1	4.32631e-05	0.000129088	0.737516	-0.000209749	0.000296276	1.00004	0.99979	1.0003
rb8niF	vp2gYX	Bladder cancer	AL356489.2_ENSG00000260947	Wald ratio	1	-9.63214e-05	0.00023748	0.685038	-0.000561783	0.00036914	0.999904	0.999438	1.00037
RGrAga	vp2gYX	Bladder cancer	CR1_ENSG00000203710	Wald ratio	1	-6.12626e-05	0.000184015	0.739193	-0.000421932	0.000299406	0.999939	0.999578	1.0003
rKokax	vp2gYX	Bladder cancer	ANO4_ENSG00000151572	Wald ratio	1	-0.000684087	0.000484707	0.158144	-0.00163411	0.000265939	0.999316	0.998367	1.00027
RkZzGn	vp2gYX	Bladder cancer	PI16_ENSG00000164530	Wald ratio	1	-0.000100512	0.000164421	0.540995	-0.000422777	0.000221753	0.999899	0.999577	1.00022
rl0YQi	vp2gYX	Bladder cancer	HEPACAM_ENSG00000165478	Wald ratio	1	-1.71204e-05	0.000274124	0.950201	-0.000554403	0.000520163	0.999983	0.999446	1.00052
rnAiSl	vp2gYX	Bladder cancer	FOXN2_ENSG00000170802	Wald ratio	1	-0.000299694	0.000159315	0.0599528	-0.000611951	1.25635e-05	0.9997	0.999388	1.00001
Ro2hsQ	vp2gYX	Bladder cancer	ALDH9A1_ENSG00000143149	Wald ratio	1	-0.000191524	0.00036727	0.602032	-0.000911374	0.000528325	0.999808	0.999089	1.00053
RpFmbl	vp2gYX	Bladder cancer	AC107204.1_ENSG00000281392	Wald ratio	1	-5.21229e-05	0.000321422	0.871177	-0.000682111	0.000577865	0.999948	0.999318	1.00058
RPNyzQ	vp2gYX	Bladder cancer	JUP_ENSG00000173801	Wald ratio	1	-0.000129871	0.000301361	0.666507	-0.000720539	0.000460798	0.99987	0.99928	1.00046
rPZs0z	vp2gYX	Bladder cancer	FAM184B_ENSG00000047662	Wald ratio	1	4.68798e-06	0.000245556	0.984768	-0.000476602	0.000485978	1	0.999524	1.00049
Rrc0mD	vp2gYX	Bladder cancer	CCDC32_ENSG00000128891	Wald ratio	1	-0.000191602	0.000192415	0.31936	-0.000568735	0.000185531	0.999808	0.999431	1.00019
RROpHw	vp2gYX	Bladder cancer	EXOSC6_ENSG00000223496	Wald ratio	1	-0.000259957	0.00021854	0.234237	-0.000688295	0.000168381	0.99974	0.999312	1.00017
RrPUpB	vp2gYX	Bladder cancer	HSD17B4_ENSG00000133835	Wald ratio	1	-6.73604e-06	0.000181254	0.970355	-0.000361994	0.000348522	0.999993	0.999638	1.00035
RszmzB	vp2gYX	Bladder cancer	TEX14_ENSG00000121101	Wald ratio	1	-0.00032597	0.00036315	0.369389	-0.00103774	0.000385804	0.999674	0.998963	1.00039
RWUIee	vp2gYX	Bladder cancer	RABGAP1L_ENSG00000152061	Wald ratio	1	0.000376761	0.000468191	0.420984	-0.000540894	0.00129442	1.00038	0.999459	1.0013
RYBHCs	vp2gYX	Bladder cancer	SLC27A1_ENSG00000130304	Wald ratio	1	0.000279714	0.000183533	0.127497	-8.00119e-05	0.000639439	1.00028	0.99992	1.00064
saIGd9	vp2gYX	Bladder cancer	NARS2_ENSG00000137513	Wald ratio	1	0.000164542	0.000292853	0.574212	-0.00040945	0.000738534	1.00016	0.999591	1.00074
sCs0TX	vp2gYX	Bladder cancer	ZNF559-ZNF177_ENSG00000270011	Wald ratio	1	6.37138e-05	0.000279887	0.819925	-0.000484865	0.000612293	1.00006	0.999515	1.00061
SdFlfa	vp2gYX	Bladder cancer	SEC14L1_ENSG00000129657	Wald ratio	1	0.000371459	0.000373077	0.319414	-0.000359772	0.00110269	1.00037	0.99964	1.0011
SFYDzq	vp2gYX	Bladder cancer	RABEP1_ENSG00000029725	Wald ratio	1	0.000669297	0.000375851	0.0749534	-6.73716e-05	0.00140597	1.00067	0.999933	1.00141
SgjrTb	vp2gYX	Bladder cancer	ASTN2_ENSG00000148219	Wald ratio	1	0.000233155	0.000412689	0.572097	-0.000575716	0.00104203	1.00023	0.999424	1.00104
sGO7TG	vp2gYX	Bladder cancer	RAB27A_ENSG00000069974	Wald ratio	1	7.97959e-05	0.000251067	0.750617	-0.000412296	0.000571888	1.00008	0.999588	1.00057
SITo6L	vp2gYX	Bladder cancer	OR7C1_ENSG00000127530	Wald ratio	1	5.43171e-05	0.00024095	0.821645	-0.000417945	0.000526579	1.00005	0.999582	1.00053
sJUqST	vp2gYX	Bladder cancer	TMEM131L_ENSG00000121210	Wald ratio	1	0.000169159	0.000352907	0.631702	-0.000522538	0.000860857	1.00017	0.999478	1.00086
sKaG1m	vp2gYX	Bladder cancer	CNPPD1_ENSG00000115649	Wald ratio	1	-1.53915e-05	0.0003449	0.964405	-0.000691396	0.000660613	0.999985	0.999309	1.00066
sL8xGS	vp2gYX	Bladder cancer	MYO1H_ENSG00000174527	Wald ratio	1	-0.000322155	0.000382908	0.400159	-0.00107265	0.000428345	0.999678	0.998928	1.00043
SMIWyw	vp2gYX	Bladder cancer	PICK1_ENSG00000100151	Wald ratio	1	0.000320602	0.000188024	0.0881739	-4.79256e-05	0.00068913	1.00032	0.999952	1.00069
SNfKIm	vp2gYX	Bladder cancer	FTCD_ENSG00000160282	Wald ratio	1	0.000142021	0.000153421	0.354604	-0.000158683	0.000442725	1.00014	0.999841	1.00044
SsPnMs	vp2gYX	Bladder cancer	RNF114_ENSG00000124226	Wald ratio	1	-9.63538e-05	0.000410281	0.814326	-0.000900505	0.000707797	0.999904	0.9991	1.00071
SsyBKv	vp2gYX	Bladder cancer	CYB5A_ENSG00000166347	Wald ratio	1	0.000248719	0.000318432	0.434759	-0.000375408	0.000872847	1.00025	0.999625	1.00087
sUiEiY	vp2gYX	Bladder cancer	DLL1_ENSG00000198719	Wald ratio	1	-0.000143038	0.000358297	0.689734	-0.000845299	0.000559224	0.999857	0.999155	1.00056
sWSFPW	vp2gYX	Bladder cancer	SEPT10_ENSG00000186522	Wald ratio	1	0.000183072	0.000309131	0.553707	-0.000422825	0.000788968	1.00018	0.999577	1.00079
sX82rY	vp2gYX	Bladder cancer	ABHD6_ENSG00000163686	Wald ratio	1	-0.000340522	0.000515282	0.508711	-0.00135047	0.00066943	0.99966	0.99865	1.00067
SY0S3q	vp2gYX	Bladder cancer	DACT1_ENSG00000165617	Wald ratio	1	-3.23286e-05	0.000216938	0.881536	-0.000457527	0.00039287	0.999968	0.999543	1.00039
sYMGuK	vp2gYX	Bladder cancer	AC084032.1_ENSG00000257139	Wald ratio	1	6.38678e-05	0.000168688	0.704974	-0.000266761	0.000394497	1.00006	0.999733	1.00039
T1OKTl	vp2gYX	Bladder cancer	NPIPB2_ENSG00000234719	Wald ratio	1	7.34417e-05	0.00014417	0.610464	-0.000209131	0.000356015	1.00007	0.999791	1.00036
T5lukL	vp2gYX	Bladder cancer	XYLT2_ENSG00000015532	Wald ratio	1	0.000237729	0.00031095	0.444554	-0.000371733	0.000847191	1.00024	0.999628	1.00085
T7zDAo	vp2gYX	Bladder cancer	PEX6_ENSG00000124587	Wald ratio	1	-3.7436e-05	0.000238028	0.875028	-0.000503972	0.000429099	0.999963	0.999496	1.00043
TbtVGi	vp2gYX	Bladder cancer	ZNF189_ENSG00000136870	Wald ratio	1	0.000105413	0.000477717	0.825357	-0.000830912	0.00104174	1.00011	0.999169	1.00104
TD38H2	vp2gYX	Bladder cancer	PKP4_ENSG00000144283	Wald ratio	1	-0.000111205	0.000359148	0.756839	-0.000815134	0.000592725	0.999889	0.999185	1.00059
te2coc	vp2gYX	Bladder cancer	VAMP4_ENSG00000117533	Wald ratio	1	-8.30408e-05	0.000444338	0.85175	-0.000953944	0.000787862	0.999917	0.999047	1.00079
tgcEuL	vp2gYX	Bladder cancer	FOXJ3_ENSG00000198815	Wald ratio	1	-0.000596186	0.000374926	0.111802	-0.00133104	0.000138668	0.999404	0.99867	1.00014
tiI1vY	vp2gYX	Bladder cancer	AC124319.1_ENSG00000173821	Wald ratio	1	-0.00010766	0.000199472	0.589386	-0.000498626	0.000283305	0.999892	0.999501	1.00028
Tj0EdN	vp2gYX	Bladder cancer	CUBN_ENSG00000107611	Wald ratio	1	-0.000200574	0.000269156	0.456155	-0.00072812	0.000326973	0.999799	0.999272	1.00033
TkSAAp	vp2gYX	Bladder cancer	LRRC8B_ENSG00000197147	Wald ratio	1	-0.00026442	0.000337951	0.433966	-0.000926804	0.000397963	0.999736	0.999074	1.0004
tlakSG	vp2gYX	Bladder cancer	TECPR2_ENSG00000196663	Wald ratio	1	0.000719022	0.000527948	0.173224	-0.000315756	0.0017538	1.00072	0.999684	1.00176
tltizS	vp2gYX	Bladder cancer	WBP2NL_ENSG00000183066	Wald ratio	1	-1.25821e-06	0.000284387	0.99647	-0.000558656	0.000556139	0.999999	0.999442	1.00056
tmuFPR	vp2gYX	Bladder cancer	VPS8_ENSG00000156931	Wald ratio	1	0.000167004	0.000536668	0.755658	-0.000884865	0.00121887	1.00017	0.999116	1.00122
TrGIHv	vp2gYX	Bladder cancer	NAALAD2_ENSG00000077616	Wald ratio	1	5.23679e-05	0.000272063	0.847363	-0.000480875	0.000585611	1.00005	0.999519	1.00059
tRKU2J	vp2gYX	Bladder cancer	NARF_ENSG00000141562	Wald ratio	1	-0.000159235	0.000363481	0.661325	-0.000871659	0.000553188	0.999841	0.999129	1.00055
Ts0DuD	vp2gYX	Bladder cancer	SMC2_ENSG00000136824	Wald ratio	1	0.000311964	0.000446074	0.48433	-0.000562341	0.00118627	1.00031	0.999438	1.00119
tS4YwQ	vp2gYX	Bladder cancer	PACRG_ENSG00000112530	Wald ratio	1	0.000172318	0.000395487	0.663046	-0.000602837	0.000947473	1.00017	0.999397	1.00095
tSirfb	vp2gYX	Bladder cancer	KIF16B_ENSG00000089177	Wald ratio	1	-0.000189962	0.000486822	0.696383	-0.00114413	0.00076421	0.99981	0.998857	1.00076
tsLwFO	vp2gYX	Bladder cancer	PDE1A_ENSG00000115252	Wald ratio	1	-0.000170124	0.000136317	0.212029	-0.000437304	9.70566e-05	0.99983	0.999563	1.0001
TudMJX	vp2gYX	Bladder cancer	SFI1_ENSG00000198089	Wald ratio	1	1.58175e-05	0.000352914	0.964251	-0.000675895	0.00070753	1.00002	0.999324	1.00071
tVi16K	vp2gYX	Bladder cancer	ZSCAN18_ENSG00000121413	Wald ratio	1	-8.82677e-05	0.000422946	0.834685	-0.000917242	0.000740706	0.999912	0.999083	1.00074
TygCX8	vp2gYX	Bladder cancer	FLYWCH1_ENSG00000059122	Wald ratio	1	-0.000575099	0.00033304	0.0842009	-0.00122786	7.766e-05	0.999425	0.998773	1.00008
U0gs18	vp2gYX	Bladder cancer	TMEM220_ENSG00000187824	Wald ratio	1	-0.000204583	0.000365179	0.575325	-0.000920333	0.000511168	0.999795	0.99908	1.00051
u2cjJt	vp2gYX	Bladder cancer	CCDC66_ENSG00000180376	Wald ratio	1	0.000311865	0.000392289	0.426622	-0.000457023	0.00108075	1.00031	0.999543	1.00108
U40L4W	vp2gYX	Bladder cancer	AMPD3_ENSG00000133805	Wald ratio	1	0.000137861	0.000152451	0.365839	-0.000160943	0.000436664	1.00014	0.999839	1.00044
u4EHsf	vp2gYX	Bladder cancer	FAM95C_ENSG00000283486	Wald ratio	1	3.6266e-05	0.000281717	0.89757	-0.000515899	0.000588431	1.00004	0.999484	1.00059
U8K2i1	vp2gYX	Bladder cancer	AL121656.1_ENSG00000236854	Wald ratio	1	-0.000139364	0.000308637	0.651597	-0.000744293	0.000465565	0.999861	0.999256	1.00047
U8rexQ	vp2gYX	Bladder cancer	RBPJ_ENSG00000168214	Wald ratio	1	-0.000927065	0.000517649	0.0733071	-0.00194166	8.75272e-05	0.999073	0.99806	1.00009
UajG1j	vp2gYX	Bladder cancer	LSS_ENSG00000160285	Wald ratio	1	0.000265725	0.000287054	0.354604	-0.000296901	0.000828351	1.00027	0.999703	1.00083
UB14D6	vp2gYX	Bladder cancer	ADAMTSL3_ENSG00000156218	Wald ratio	1	-2.73323e-05	0.000418431	0.947918	-0.000847457	0.000792792	0.999973	0.999153	1.00079
uBMBUR	vp2gYX	Bladder cancer	DPP6_ENSG00000130226	Wald ratio	1	0.000149989	0.000202446	0.458763	-0.000246805	0.000546784	1.00015	0.999753	1.00055
ud5ZK7	vp2gYX	Bladder cancer	AC011416.3_ENSG00000283897	Wald ratio	1	1.27582e-05	0.00025163	0.959563	-0.000480436	0.000505953	1.00001	0.99952	1.00051
ufFCx3	vp2gYX	Bladder cancer	CASP9_ENSG00000132906	Wald ratio	1	-0.000578438	0.000382084	0.130051	-0.00132732	0.000170447	0.999422	0.998674	1.00017
uFX16A	vp2gYX	Bladder cancer	LINC01695_ENSG00000236532	Wald ratio	1	0.000345974	0.000360553	0.337273	-0.000360709	0.00105266	1.00035	0.999639	1.00105
ugrh5k	vp2gYX	Bladder cancer	TOM1L1_ENSG00000141198	Wald ratio	1	-0.000546168	0.00063114	0.386838	-0.0017832	0.000690868	0.999454	0.998218	1.00069
uh9wdo	vp2gYX	Bladder cancer	SPATA7_ENSG00000042317	Wald ratio	1	-0.000117051	0.000187949	0.533428	-0.000485431	0.000251329	0.999883	0.999515	1.00025
uKR5MD	vp2gYX	Bladder cancer	SFXN4_ENSG00000183605	Wald ratio	1	8.56895e-05	0.000278166	0.758043	-0.000459517	0.000630895	1.00009	0.999541	1.00063
uMrx1O	vp2gYX	Bladder cancer	CNTNAP3_ENSG00000106714	Wald ratio	1	3.75028e-05	0.000291324	0.89757	-0.000533493	0.000608498	1.00004	0.999467	1.00061
uo0SsQ	vp2gYX	Bladder cancer	COG6_ENSG00000133103	Wald ratio	1	-0.00029848	0.000331454	0.367844	-0.000948129	0.000351169	0.999702	0.999052	1.00035
uo4zzG	vp2gYX	Bladder cancer	UBE2Z_ENSG00000159202	Wald ratio	1	0.00010803	0.000381431	0.777005	-0.000639574	0.000855634	1.00011	0.999361	1.00086
uqhzZx	vp2gYX	Bladder cancer	TMEM177_ENSG00000144120	Wald ratio	1	9.07715e-05	0.000355288	0.798347	-0.000605593	0.000787136	1.00009	0.999395	1.00079
uRKQlV	vp2gYX	Bladder cancer	AC010145.1_ENSG00000226764	Wald ratio	1	-0.000387469	0.000304798	0.203646	-0.000984873	0.000209935	0.999613	0.999016	1.00021
usXOaA	vp2gYX	Bladder cancer	RNF170_ENSG00000120925	Wald ratio	1	0.000673634	0.000513081	0.18921	-0.000332005	0.00167927	1.00067	0.999668	1.00168
uUG261	vp2gYX	Bladder cancer	AL355315.1_ENSG00000249967	Wald ratio	1	0.000244629	0.000263405	0.353035	-0.000271644	0.000760902	1.00024	0.999728	1.00076
uuuZZq	vp2gYX	Bladder cancer	NCOA7_ENSG00000111912	Wald ratio	1	0.000273197	0.000181776	0.132857	-8.30842e-05	0.000629478	1.00027	0.999917	1.00063
UVaZYN	vp2gYX	Bladder cancer	LRRC63_ENSG00000173988	Wald ratio	1	-0.000345735	0.000483551	0.474615	-0.00129349	0.000602025	0.999654	0.998707	1.0006
UXCPmr	vp2gYX	Bladder cancer	CCDC82_ENSG00000149231	Wald ratio	1	-0.000379609	0.000236244	0.108086	-0.000842647	8.34279e-05	0.99962	0.999158	1.00008
UxKnvs	vp2gYX	Bladder cancer	DRD2_ENSG00000149295	Wald ratio	1	0.000477215	0.000281273	0.0897677	-7.40805e-05	0.00102851	1.00048	0.999926	1.00103
UYKF4u	vp2gYX	Bladder cancer	ZNF160_ENSG00000170949	Wald ratio	1	0.000212591	0.000215231	0.323282	-0.000209261	0.000634444	1.00021	0.999791	1.00063
uZoHPd	vp2gYX	Bladder cancer	INPP1_ENSG00000151689	Wald ratio	1	-0.00030837	0.000475986	0.517078	-0.0012413	0.000624562	0.999692	0.998759	1.00062
V1oFu4	vp2gYX	Bladder cancer	CCDC146_ENSG00000135205	Wald ratio	1	0.000174986	0.000267802	0.51349	-0.000349907	0.000699878	1.00018	0.99965	1.0007
v2Ka3V	vp2gYX	Bladder cancer	DPH1_ENSG00000108963	Wald ratio	1	-0.000286346	0.00021968	0.192415	-0.000716919	0.000144227	0.999714	0.999283	1.00014
v3VHgF	vp2gYX	Bladder cancer	VPS53_ENSG00000141252	Wald ratio	1	1.76587e-05	0.000368789	0.961809	-0.000705167	0.000740484	1.00002	0.999295	1.00074
Va6Iub	vp2gYX	Bladder cancer	ZP3_ENSG00000188372	Wald ratio	1	-0.000305626	0.00030211	0.311712	-0.000897762	0.000286511	0.999694	0.999103	1.00029
vAiJg5	vp2gYX	Bladder cancer	ASAP2_ENSG00000151693	Wald ratio	1	0.000219057	0.000143874	0.127869	-6.29363e-05	0.000501051	1.00022	0.999937	1.0005
vCB7xC	vp2gYX	Bladder cancer	PFKL_ENSG00000141959	Wald ratio	1	-0.000556359	0.000307827	0.0707037	-0.0011597	4.6982e-05	0.999444	0.998841	1.00005
vd5hRX	vp2gYX	Bladder cancer	FOXP4_ENSG00000137166	Wald ratio	1	-4.49801e-05	0.000289047	0.876336	-0.000611512	0.000521552	0.999955	0.999389	1.00052
vDOTnF	vp2gYX	Bladder cancer	GPIHBP1_ENSG00000277494	Wald ratio	1	8.58917e-05	0.000444405	0.846745	-0.000785142	0.000956925	1.00009	0.999215	1.00096
vDulrc	vp2gYX	Bladder cancer	ATAD3C_ENSG00000215915	Wald ratio	1	-3.26644e-05	0.000315361	0.917504	-0.000650771	0.000585442	0.999967	0.999349	1.00059
VFed8T	vp2gYX	Bladder cancer	AC008060.1_ENSG00000218672	Wald ratio	1	-0.000231286	0.000138912	0.0959147	-0.000503553	4.09802e-05	0.999769	0.999497	1.00004
VIwTVF	vp2gYX	Bladder cancer	MGRN1_ENSG00000102858	Wald ratio	1	5.26299e-05	0.000211729	0.803692	-0.00036236	0.00046762	1.00005	0.999638	1.00047
VkoyPu	vp2gYX	Bladder cancer	PYROXD1_ENSG00000121350	Wald ratio	1	-0.000100761	0.000239346	0.673765	-0.000569879	0.000368357	0.999899	0.99943	1.00037
vLSJGo	vp2gYX	Bladder cancer	GTPBP8_ENSG00000163607	Wald ratio	1	-0.00035091	0.000268706	0.191578	-0.000877573	0.000175753	0.999649	0.999123	1.00018
VlZwKt	vp2gYX	Bladder cancer	SERPINI1_ENSG00000163536	Wald ratio	1	-0.000233556	0.000212229	0.271118	-0.000649524	0.000182412	0.999766	0.999351	1.00018
vNHhYX	vp2gYX	Bladder cancer	SRA1_ENSG00000213523	Wald ratio	1	0.00016637	0.000222619	0.454863	-0.000269963	0.000602704	1.00017	0.99973	1.0006
VOH8uu	vp2gYX	Bladder cancer	OTUD7A_ENSG00000169918	Wald ratio	1	-0.000114371	0.000146717	0.435666	-0.000401936	0.000173194	0.999886	0.999598	1.00017
VomH6X	vp2gYX	Bladder cancer	GSTO2_ENSG00000065621	Wald ratio	1	-0.000190986	0.000299025	0.52302	-0.000777075	0.000395102	0.999809	0.999223	1.0004
VpGoLK	vp2gYX	Bladder cancer	PCNX1_ENSG00000100731	Wald ratio	1	-0.000209031	0.000516486	0.685685	-0.00122134	0.000803281	0.999791	0.998779	1.0008
vpVi4B	vp2gYX	Bladder cancer	ABCA8_ENSG00000141338	Wald ratio	1	1.6638e-06	0.000372876	0.99644	-0.000729173	0.000732501	1	0.999271	1.00073
vr2GP2	vp2gYX	Bladder cancer	KIRREL3_ENSG00000149571	Wald ratio	1	-0.000331962	0.000326864	0.309822	-0.000972615	0.000308691	0.999668	0.999028	1.00031
vuNrEZ	vp2gYX	Bladder cancer	TMPRSS5_ENSG00000166682	Wald ratio	1	0.000211791	0.000124831	0.0897677	-3.28774e-05	0.000456459	1.00021	0.999967	1.00046
VUpAYN	vp2gYX	Bladder cancer	LINC00665_ENSG00000232677	Wald ratio	1	2.77357e-05	0.000255136	0.913433	-0.000472331	0.000527802	1.00003	0.999528	1.00053
vuZpGM	vp2gYX	Bladder cancer	FAM174B_ENSG00000185442	Wald ratio	1	0.000139901	0.000287328	0.626327	-0.000423262	0.000703063	1.00014	0.999577	1.0007
VWketd	vp2gYX	Bladder cancer	PWP2_ENSG00000241945	Wald ratio	1	-1.52019e-05	0.000154617	0.921679	-0.000318251	0.000287848	0.999985	0.999682	1.00029
VWpLY0	vp2gYX	Bladder cancer	CCDC122_ENSG00000151773	Wald ratio	1	-0.000142574	0.000167547	0.394795	-0.000470966	0.000185817	0.999857	0.999529	1.00019
VYB4zO	vp2gYX	Bladder cancer	NFATC1_ENSG00000131196	Wald ratio	1	-0.00032841	0.000373904	0.379766	-0.00106126	0.000404441	0.999672	0.998939	1.0004
vzL2pf	vp2gYX	Bladder cancer	WWTR1_ENSG00000018408	Wald ratio	1	0.000398849	0.000370101	0.281178	-0.000326549	0.00112425	1.0004	0.999674	1.00112
w8TaUP	vp2gYX	Bladder cancer	ITGAV_ENSG00000138448	Wald ratio	1	-8.36208e-05	0.000305637	0.784396	-0.000682669	0.000515427	0.999916	0.999318	1.00052
WBdFJv	vp2gYX	Bladder cancer	CNBD1_ENSG00000176571	Wald ratio	1	7.0404e-05	0.000195544	0.718816	-0.000312862	0.00045367	1.00007	0.999687	1.00045
WCZE9x	vp2gYX	Bladder cancer	MPHOSPH6_ENSG00000135698	Wald ratio	1	0.000206107	0.000339652	0.543971	-0.000459611	0.000871825	1.00021	0.99954	1.00087
WdqYKq	vp2gYX	Bladder cancer	OGFR_ENSG00000060491	Wald ratio	1	-0.000117699	0.000335123	0.725429	-0.000774541	0.000539142	0.999882	0.999226	1.00054
WEF2h0	vp2gYX	Bladder cancer	ENDOD1_ENSG00000149218	Wald ratio	1	-9.38232e-05	0.000343616	0.784818	-0.000767311	0.000579665	0.999906	0.999233	1.00058
wewwTj	vp2gYX	Bladder cancer	LRRC8A_ENSG00000136802	Wald ratio	1	-5.57818e-06	0.000246145	0.98192	-0.000488022	0.000476866	0.999994	0.999512	1.00048
wfX4wu	vp2gYX	Bladder cancer	AVEN_ENSG00000169857	Wald ratio	1	-3.58838e-05	0.000144624	0.804043	-0.000319346	0.000247578	0.999964	0.999681	1.00025
WgNgcx	vp2gYX	Bladder cancer	ZNF415_ENSG00000170954	Wald ratio	1	0.000135668	0.000137353	0.323282	-0.000133543	0.000404879	1.00014	0.999866	1.0004
wI2zn5	vp2gYX	Bladder cancer	OR2L3_ENSG00000198128	Wald ratio	1	-3.79812e-05	0.000167739	0.820867	-0.00036675	0.000290788	0.999962	0.999633	1.00029
WiqkxF	vp2gYX	Bladder cancer	CRYZ_ENSG00000116791	Wald ratio	1	6.61571e-05	0.000329353	0.8408	-0.000579375	0.000711689	1.00007	0.999421	1.00071
wJaOj1	vp2gYX	Bladder cancer	AGPAT4_ENSG00000026652	Wald ratio	1	-0.000578167	0.000554505	0.2971	-0.001665	0.000508663	0.999422	0.998336	1.00051
WnkkFD	vp2gYX	Bladder cancer	GAA_ENSG00000171298	Wald ratio	1	0.000179784	0.000347018	0.604401	-0.000500372	0.00085994	1.00018	0.9995	1.00086
woSFwh	vp2gYX	Bladder cancer	XKR9_ENSG00000221947	Wald ratio	1	-0.000173927	0.0001331	0.191303	-0.000434804	8.69499e-05	0.999826	0.999565	1.00009
wUDcTJ	vp2gYX	Bladder cancer	MUC20-OT1_ENSG00000242086	Wald ratio	1	-0.000172402	0.000189008	0.361693	-0.000542857	0.000198053	0.999828	0.999457	1.0002
wv2B7v	vp2gYX	Bladder cancer	HELB_ENSG00000127311	Wald ratio	1	2.97902e-05	0.000226586	0.8954	-0.000414319	0.000473899	1.00003	0.999586	1.00047
WvjGdy	vp2gYX	Bladder cancer	HMGCL_ENSG00000117305	Wald ratio	1	-0.000137737	0.00036053	0.702432	-0.000844375	0.000568902	0.999862	0.999156	1.00057
WZ769C	vp2gYX	Bladder cancer	TSPAN11_ENSG00000110900	Wald ratio	1	-0.000207198	0.000157816	0.189215	-0.000516518	0.000102122	0.999793	0.999484	1.0001
X0lWgF	vp2gYX	Bladder cancer	RMDN1_ENSG00000176623	Wald ratio	1	8.0329e-05	0.000368956	0.827648	-0.000642825	0.000803484	1.00008	0.999357	1.0008
xaalIQ	vp2gYX	Bladder cancer	ECPAS_ENSG00000136813	Wald ratio	1	1.097e-05	0.000282657	0.969042	-0.000543038	0.000564978	1.00001	0.999457	1.00057
xeglZC	vp2gYX	Bladder cancer	SH3PXD2B_ENSG00000174705	Wald ratio	1	0.000193994	0.000435317	0.655858	-0.000659228	0.00104722	1.00019	0.999341	1.00105
XhP17i	vp2gYX	Bladder cancer	FKRP_ENSG00000181027	Wald ratio	1	-0.000427498	0.000321836	0.184076	-0.0010583	0.000203301	0.999573	0.998942	1.0002
XHuIZU	vp2gYX	Bladder cancer	PNLDC1_ENSG00000146453	Wald ratio	1	-0.000407137	0.000412357	0.323476	-0.00121536	0.000401084	0.999593	0.998785	1.0004
xKNwWk	vp2gYX	Bladder cancer	FRG1-DT_ENSG00000245685	Wald ratio	1	-6.00061e-05	0.000195466	0.758851	-0.00044312	0.000323107	0.99994	0.999557	1.00032
xlEM3Y	vp2gYX	Bladder cancer	ROBO1_ENSG00000169855	Wald ratio	1	-0.000407562	0.000521422	0.434429	-0.00142955	0.000614426	0.999593	0.998571	1.00061
XORX2h	vp2gYX	Bladder cancer	KIF25_ENSG00000125337	Wald ratio	1	5.70992e-05	0.000179621	0.750571	-0.000294959	0.000409157	1.00006	0.999705	1.00041
xQ2W7d	vp2gYX	Bladder cancer	FUT10_ENSG00000172728	Wald ratio	1	-9.78879e-05	0.000288409	0.734304	-0.00066317	0.000467394	0.999902	0.999337	1.00047
xQlaUr	vp2gYX	Bladder cancer	FBXO7_ENSG00000100225	Wald ratio	1	2.14526e-05	0.00027724	0.938322	-0.000521938	0.000564843	1.00002	0.999478	1.00057
XRco7W	vp2gYX	Bladder cancer	AC096887.1_ENSG00000272305	Wald ratio	1	-9.43898e-05	0.000206707	0.647933	-0.000499536	0.000310756	0.999906	0.999501	1.00031
XtJG60	vp2gYX	Bladder cancer	LARP6_ENSG00000166173	Wald ratio	1	-0.000255131	0.000394505	0.517818	-0.00102836	0.000518099	0.999745	0.998972	1.00052
xU8xHP	vp2gYX	Bladder cancer	APIP_ENSG00000149089	Wald ratio	1	-0.000201578	0.000126538	0.111156	-0.000449593	4.64371e-05	0.999798	0.999551	1.00005
xwxt2Y	vp2gYX	Bladder cancer	FBXO32_ENSG00000156804	Wald ratio	1	0.000408634	0.000317851	0.198578	-0.000214354	0.00103162	1.00041	0.999786	1.00103
XyVgvg	vp2gYX	Bladder cancer	ZNF718_ENSG00000250312	Wald ratio	1	0.000408457	0.000255957	0.110533	-9.32192e-05	0.000910133	1.00041	0.999907	1.00091
XywTrH	vp2gYX	Bladder cancer	SDCCAG8_ENSG00000054282	Wald ratio	1	-0.00043626	0.000319492	0.172102	-0.00106246	0.000189944	0.999564	0.998938	1.00019
y5hpET	vp2gYX	Bladder cancer	PRKCA_ENSG00000154229	Wald ratio	1	-0.000265998	0.00020653	0.197768	-0.000670798	0.000138801	0.999734	0.999329	1.00014
yBYYqo	vp2gYX	Bladder cancer	ADAL_ENSG00000168803	Wald ratio	1	9.30339e-05	0.000357412	0.794634	-0.000607494	0.000793562	1.00009	0.999393	1.00079
YFAl4N	vp2gYX	Bladder cancer	DLC1_ENSG00000164741	Wald ratio	1	-4.80951e-05	0.00040543	0.90557	-0.000842737	0.000746547	0.999952	0.999158	1.00075
yfEyxX	vp2gYX	Bladder cancer	LINC00920_ENSG00000246898	Wald ratio	1	9.74703e-05	0.000180218	0.588614	-0.000255758	0.000450698	1.0001	0.999744	1.00045
yfuqY8	vp2gYX	Bladder cancer	ANKRD7_ENSG00000106013	Wald ratio	1	-0.00021508	0.000214317	0.315589	-0.000635141	0.00020498	0.999785	0.999365	1.00021
yhIzla	vp2gYX	Bladder cancer	A3GALT2_ENSG00000184389	Wald ratio	1	-0.000478234	0.000309166	0.121899	-0.0010842	0.000127731	0.999522	0.998916	1.00013
Yl5Hhg	vp2gYX	Bladder cancer	LINC02482_ENSG00000251580	Wald ratio	1	6.07779e-05	0.000443164	0.890916	-0.000807823	0.000929379	1.00006	0.999193	1.00093
YLI5hN	vp2gYX	Bladder cancer	ECM2_ENSG00000106823	Wald ratio	1	-0.000176713	0.000427791	0.679546	-0.00101518	0.000661758	0.999823	0.998985	1.00066
YNo3SX	vp2gYX	Bladder cancer	SNRNP40_ENSG00000060688	Wald ratio	1	-0.000593913	0.000390024	0.127819	-0.00135836	0.000170535	0.999406	0.998643	1.00017
YnOM9U	vp2gYX	Bladder cancer	MAPK6_ENSG00000069956	Wald ratio	1	0.000233527	0.00026272	0.374066	-0.000281404	0.000748458	1.00023	0.999719	1.00075
YNt9Vj	vp2gYX	Bladder cancer	PCM1_ENSG00000078674	Wald ratio	1	0.000223499	0.000203345	0.271718	-0.000175057	0.000622055	1.00022	0.999825	1.00062
YqNUz4	vp2gYX	Bladder cancer	TBCA_ENSG00000171530	Wald ratio	1	-0.000188808	0.000282728	0.504256	-0.000742956	0.000365339	0.999811	0.999257	1.00037
yrLaIx	vp2gYX	Bladder cancer	EFHD1_ENSG00000115468	Wald ratio	1	0.000415908	0.00039396	0.2911	-0.000356254	0.00118807	1.00042	0.999644	1.00119
yWajsg	vp2gYX	Bladder cancer	EYA4_ENSG00000112319	Wald ratio	1	0.000166945	0.000197977	0.399084	-0.000221089	0.00055498	1.00017	0.999779	1.00056
yx0WLJ	vp2gYX	Bladder cancer	AQR_ENSG00000021776	Wald ratio	1	0.000315522	0.000274	0.24951	-0.000221518	0.000852561	1.00032	0.999779	1.00085
z3dI1R	vp2gYX	Bladder cancer	SEPT2_ENSG00000168385	Wald ratio	1	0.000124487	0.000273917	0.64949	-0.00041239	0.000661365	1.00012	0.999588	1.00066
zCFI7Z	vp2gYX	Bladder cancer	FAT1_ENSG00000083857	Wald ratio	1	-0.000157795	0.000323017	0.625194	-0.000790909	0.000475319	0.999842	0.999209	1.00048
zfAp6o	vp2gYX	Bladder cancer	AKAP3_ENSG00000111254	Wald ratio	1	-0.000163947	0.000248241	0.508973	-0.000650499	0.000322604	0.999836	0.99935	1.00032
zFjvds	vp2gYX	Bladder cancer	LYSMD4_ENSG00000183060	Wald ratio	1	0.000424618	0.000227683	0.0621881	-2.16408e-05	0.000870877	1.00042	0.999978	1.00087
zJaecP	vp2gYX	Bladder cancer	KLHDC4_ENSG00000104731	Wald ratio	1	-5.04378e-05	0.000159541	0.751894	-0.000363138	0.000262262	0.99995	0.999637	1.00026
ZJiUsC	vp2gYX	Bladder cancer	CAV1_ENSG00000105974	Wald ratio	1	0.000304802	0.000186722	0.102598	-6.11725e-05	0.000670777	1.0003	0.999939	1.00067
ZLZHHD	vp2gYX	Bladder cancer	PLXND1_ENSG00000004399	Wald ratio	1	0.000291201	0.000528551	0.581673	-0.000744758	0.00132716	1.00029	0.999256	1.00133
Zo8uKr	vp2gYX	Bladder cancer	CNTNAP4_ENSG00000152910	Wald ratio	1	-0.000330736	0.000392086	0.398932	-0.00109922	0.000437752	0.999669	0.998901	1.00044
ZpkhYm	vp2gYX	Bladder cancer	VARS2_ENSG00000137411	Wald ratio	1	0.000300557	0.000290204	0.300354	-0.000268243	0.000869356	1.0003	0.999732	1.00087
zRjLKp	vp2gYX	Bladder cancer	PURG_ENSG00000172733	Wald ratio	1	0.000301971	0.000261322	0.247864	-0.00021022	0.000814162	1.0003	0.99979	1.00081
Zs6p2k	vp2gYX	Bladder cancer	SORCS2_ENSG00000184985	Wald ratio	1	0.000158497	0.000202846	0.434587	-0.000239081	0.000556076	1.00016	0.999761	1.00056
zsHozw	vp2gYX	Bladder cancer	HHAT_ENSG00000054392	Wald ratio	1	4.27871e-05	0.000373897	0.908893	-0.000690052	0.000775626	1.00004	0.99931	1.00078
zSpgUy	vp2gYX	Bladder cancer	LDLRAD3_ENSG00000179241	Wald ratio	1	0.000374953	0.000277534	0.17669	-0.000169013	0.000918919	1.00038	0.999831	1.00092
zsRYF4	vp2gYX	Bladder cancer	CALD1_ENSG00000122786	Wald ratio	1	-0.000207852	0.000248379	0.402685	-0.000694675	0.00027897	0.999792	0.999306	1.00028
ZTEUyn	vp2gYX	Bladder cancer	WDR60_ENSG00000126870	Wald ratio	1	-0.000355538	0.000373673	0.341367	-0.00108794	0.000376861	0.999645	0.998913	1.00038
zuvffx	vp2gYX	Bladder cancer	OGN_ENSG00000106809	Wald ratio	1	-0.000195747	0.000473869	0.679546	-0.00112453	0.000733035	0.999804	0.998876	1.00073
zvbiMf	vp2gYX	Bladder cancer	MED4_ENSG00000136146	Wald ratio	1	2.07145e-05	0.00026837	0.938475	-0.000505291	0.00054672	1.00002	0.999495	1.00055
ZZ1YC9	vp2gYX	Bladder cancer	AC245884.8_ENSG00000267838	Wald ratio	1	-0.000152682	0.000318474	0.631643	-0.000776892	0.000471528	0.999847	0.999223	1.00047

## Sheet: Supplementary table 19
id.exposure	id.outcome	outcome	exposure	method	nsnp	b	se	pval	lo_ci	up_ci	or	or_lci95	or_uci95
0bD6ci	LXdEYu	Bladder cancer	ANKRD10_ENSG00000088448	Wald ratio	1	0.000476976	0.000453791	0.293217	-0.000412455	0.00136641	1.00048	0.999588	1.00137
0EXEK2	LXdEYu	Bladder cancer	KCNMA1_ENSG00000156113	Wald ratio	1	-0.000231595	0.000332089	0.48556	-0.00088249	0.0004193	0.999768	0.999118	1.00042
0fWy6o	LXdEYu	Bladder cancer	ZSCAN18_ENSG00000121413	Wald ratio	1	-9.52031e-06	0.000464055	0.983632	-0.000919069	0.000900028	0.99999	0.999081	1.0009
0GbOp9	LXdEYu	Bladder cancer	IFI44_ENSG00000137965	Wald ratio	1	0.000356951	0.000311702	0.25214	-0.000253985	0.000967886	1.00036	0.999746	1.00097
0u6AWL	LXdEYu	Bladder cancer	FOXN2_ENSG00000170802	Wald ratio	1	-0.000374743	0.000199211	0.0599528	-0.000765196	1.57096e-05	0.999625	0.999235	1.00002
0Wv9iq	LXdEYu	Bladder cancer	ZNF135_ENSG00000176293	Wald ratio	1	0.000447245	0.000290833	0.124096	-0.000122787	0.00101728	1.00045	0.999877	1.00102
0X8OH3	LXdEYu	Bladder cancer	ZNF232_ENSG00000167840	Wald ratio	1	0.000133697	0.000269969	0.620437	-0.000395442	0.000662836	1.00013	0.999605	1.00066
0yCKu4	LXdEYu	Bladder cancer	AC009975.1_ENSG00000282890	Wald ratio	1	4.46193e-05	0.000220426	0.839586	-0.000387416	0.000476654	1.00004	0.999613	1.00048
1265OP	LXdEYu	Bladder cancer	LINC01182_ENSG00000250634	Inverse variance weighted	2	1.65222e-05	0.000191825	0.931362	-0.000359455	0.0003925	1.00002	0.999641	1.00039
137657	LXdEYu	Bladder cancer	GPR171_ENSG00000174946	Inverse variance weighted	2	-0.000226758	0.000220772	0.304368	-0.000659472	0.000205956	0.999773	0.999341	1.00021
1aaNuy	LXdEYu	Bladder cancer	COL16A1_ENSG00000084636	Wald ratio	1	-0.00053921	0.000351422	0.12494	-0.001228	0.000149578	0.999461	0.998773	1.00015
1d91RE	LXdEYu	Bladder cancer	FAM19A2_ENSG00000198673	Wald ratio	1	0.000114638	0.000230872	0.61951	-0.00033787	0.000567147	1.00011	0.999662	1.00057
1KOHW6	LXdEYu	Bladder cancer	LINC00648_ENSG00000259129	Inverse variance weighted	2	0.000250815	0.000145704	0.0851768	-3.47637e-05	0.000536395	1.00025	0.999965	1.00054
1zxvTT	LXdEYu	Bladder cancer	GOLGA6L4_ENSG00000184206	MR Egger	3	0.00236417	0.00708283	0.794906	-0.0115182	0.0162465	1.00237	0.988548	1.01638
1zxvTT	LXdEYu	Bladder cancer	GOLGA6L4_ENSG00000184206	Weighted median	3	8.82413e-05	0.000218756	0.68667	-0.00034052	0.000517003	1.00009	0.99966	1.00052
1zxvTT	LXdEYu	Bladder cancer	GOLGA6L4_ENSG00000184206	Inverse variance weighted	3	9.99265e-05	0.000195252	0.608803	-0.000282767	0.00048262	1.0001	0.999717	1.00048
1zxvTT	LXdEYu	Bladder cancer	GOLGA6L4_ENSG00000184206	Simple mode	3	6.59833e-05	0.000267639	0.828261	-0.000458589	0.000590556	1.00007	0.999542	1.00059
1zxvTT	LXdEYu	Bladder cancer	GOLGA6L4_ENSG00000184206	Weighted mode	3	6.79913e-05	0.000255863	0.81533	-0.0004335	0.000569482	1.00007	0.999567	1.00057
2K36rp	LXdEYu	Bladder cancer	PDE4D_ENSG00000113448	Wald ratio	1	6.75219e-05	0.000365919	0.8536	-0.00064968	0.000784723	1.00007	0.999351	1.00079
2KpXnC	LXdEYu	Bladder cancer	OR2L3_ENSG00000198128	Wald ratio	1	-5.15285e-05	0.000227569	0.820867	-0.000497564	0.000394507	0.999948	0.999503	1.00039
2L8HIc	LXdEYu	Bladder cancer	RHD_ENSG00000187010	Inverse variance weighted	2	-8.70178e-05	0.000208592	0.676555	-0.000495857	0.000321822	0.999913	0.999504	1.00032
2NYKHT	LXdEYu	Bladder cancer	CACNA2D3_ENSG00000157445	Wald ratio	1	-0.000295478	0.000362488	0.414992	-0.00100595	0.000414998	0.999705	0.998995	1.00042
2WfufS	LXdEYu	Bladder cancer	DOCK9_ENSG00000088387	Inverse variance weighted	2	-0.000210722	0.000249117	0.397621	-0.000698991	0.000277546	0.999789	0.999301	1.00028
32FUxV	LXdEYu	Bladder cancer	AC090630.1_ENSG00000257239	Wald ratio	1	-0.000147706	0.000172321	0.391359	-0.000485456	0.000190044	0.999852	0.999515	1.00019
35bkN0	LXdEYu	Bladder cancer	ZNF718_ENSG00000250312	Wald ratio	1	0.000459517	0.000287954	0.110533	-0.000104872	0.00102391	1.00046	0.999895	1.00102
3AXWkp	LXdEYu	Bladder cancer	TMPRSS11A_ENSG00000187054	Wald ratio	1	-0.000326292	0.000302124	0.280145	-0.000918454	0.000265871	0.999674	0.999082	1.00027
3u42V5	LXdEYu	Bladder cancer	SNHG18_ENSG00000250786	Wald ratio	1	-0.000558834	0.000326345	0.0868226	-0.00119847	8.08023e-05	0.999441	0.998802	1.00008
3YzSSI	LXdEYu	Bladder cancer	RASGEF1C_ENSG00000146090	Wald ratio	1	0.000513631	0.000323773	0.112651	-0.000120964	0.00114823	1.00051	0.999879	1.00115
48mU3K	LXdEYu	Bladder cancer	ARHGAP42_ENSG00000165895	Wald ratio	1	-0.000110371	0.000298122	0.711218	-0.000694691	0.000473949	0.99989	0.999306	1.00047
4CJVq2	LXdEYu	Bladder cancer	FRG1-DT_ENSG00000245685	Wald ratio	1	-7.13303e-05	0.000208541	0.732318	-0.000480071	0.000337411	0.999929	0.99952	1.00034
4t2kL7	LXdEYu	Bladder cancer	EEF2K_ENSG00000103319	Wald ratio	1	0.000344019	0.000418579	0.411149	-0.000476396	0.00116443	1.00034	0.999524	1.00117
4tph6n	LXdEYu	Bladder cancer	PIGZ_ENSG00000119227	Wald ratio	1	0.000310023	0.000337148	0.357811	-0.000350788	0.000970834	1.00031	0.999649	1.00097
50M5js	LXdEYu	Bladder cancer	LINC00865_ENSG00000232229	Inverse variance weighted	2	-0.000309192	0.000148061	0.0367726	-0.000599391	-1.89932e-05	0.999691	0.999401	0.999981
5Az2jR	LXdEYu	Bladder cancer	SFXN4_ENSG00000183605	Wald ratio	1	8.29113e-05	0.000259273	0.749132	-0.000425264	0.000591087	1.00008	0.999575	1.00059
5lql8k	LXdEYu	Bladder cancer	MYO5A_ENSG00000197535	Wald ratio	1	0.000139011	0.000492713	0.777841	-0.000826707	0.00110473	1.00014	0.999174	1.00111
5z29q7	LXdEYu	Bladder cancer	RPN1_ENSG00000163902	Wald ratio	1	0.000371811	0.000285936	0.193488	-0.000188624	0.000932246	1.00037	0.999811	1.00093
6B8fLs	LXdEYu	Bladder cancer	DHCR7_ENSG00000172893	Inverse variance weighted	2	-9.97939e-05	0.00014206	0.482382	-0.000378232	0.000178644	0.9999	0.999622	1.00018
6bPFo2	LXdEYu	Bladder cancer	EFHB_ENSG00000163576	Wald ratio	1	0.000216527	0.000173781	0.212774	-0.000124084	0.000557139	1.00022	0.999876	1.00056
6nM3VU	LXdEYu	Bladder cancer	CNBD1_ENSG00000176571	Wald ratio	1	7.43857e-05	0.000288458	0.796504	-0.000490992	0.000639764	1.00007	0.999509	1.00064
6wpnmC	LXdEYu	Bladder cancer	SDK1_ENSG00000146555	Wald ratio	1	-0.000510711	0.00031474	0.104666	-0.0011276	0.00010618	0.999489	0.998873	1.00011
7RtexR	LXdEYu	Bladder cancer	CACNA1G_ENSG00000006283	Wald ratio	1	0.000282249	0.000244147	0.247655	-0.000196278	0.000760776	1.00028	0.999804	1.00076
7sONmg	LXdEYu	Bladder cancer	RSPO4_ENSG00000101282	Wald ratio	1	7.26371e-05	0.00024496	0.766828	-0.000407484	0.000552758	1.00007	0.999593	1.00055
8AUnGi	LXdEYu	Bladder cancer	MTRF1L_ENSG00000112031	Wald ratio	1	0.000294733	0.000264415	0.264996	-0.00022352	0.000812986	1.00029	0.999777	1.00081
8lVxbQ	LXdEYu	Bladder cancer	GPR155_ENSG00000163328	Wald ratio	1	-6.93347e-05	0.000191056	0.716677	-0.000443804	0.000305135	0.999931	0.999556	1.00031
8oQyvb	LXdEYu	Bladder cancer	CLHC1_ENSG00000162994	Wald ratio	1	-7.14665e-05	0.000177436	0.687115	-0.000419242	0.000276309	0.999929	0.999581	1.00028
8xJR1u	LXdEYu	Bladder cancer	OR2L5_ENSG00000197454	Wald ratio	1	-8.67454e-05	0.000267256	0.745501	-0.000610567	0.000437076	0.999913	0.99939	1.00044
9a8IgZ	LXdEYu	Bladder cancer	WDR86_ENSG00000187260	Wald ratio	1	-3.15355e-05	0.000211362	0.881395	-0.000445805	0.000382734	0.999968	0.999554	1.00038
9aYCid	LXdEYu	Bladder cancer	LINS1_ENSG00000140471	Wald ratio	1	0.000206214	0.00022408	0.35743	-0.000232982	0.00064541	1.00021	0.999767	1.00065
9YoPZs	LXdEYu	Bladder cancer	CCDC125_ENSG00000183323	Inverse variance weighted	2	-0.000207532	0.000220023	0.345565	-0.000638777	0.000223714	0.999792	0.999361	1.00022
aDaBoo	LXdEYu	Bladder cancer	ANKRD36B_ENSG00000196912	MR Egger	6	-0.000103733	0.00123321	0.937005	-0.00252082	0.00231335	0.999896	0.997482	1.00232
aDaBoo	LXdEYu	Bladder cancer	ANKRD36B_ENSG00000196912	Weighted median	6	-0.000323611	0.000130887	0.0134191	-0.00058015	-6.7073e-05	0.999676	0.99942	0.999933
aDaBoo	LXdEYu	Bladder cancer	ANKRD36B_ENSG00000196912	Inverse variance weighted	6	-0.000354694	0.000109555	0.00120542	-0.000569421	-0.000139967	0.999645	0.999431	0.99986
aDaBoo	LXdEYu	Bladder cancer	ANKRD36B_ENSG00000196912	Simple mode	6	-0.000317977	0.000183429	0.143539	-0.000677498	4.15431e-05	0.999682	0.999323	1.00004
aDaBoo	LXdEYu	Bladder cancer	ANKRD36B_ENSG00000196912	Weighted mode	6	-0.000316755	0.000185937	0.149189	-0.000681191	4.76806e-05	0.999683	0.999319	1.00005
AF5e9x	LXdEYu	Bladder cancer	AC010615.4_ENSG00000269237	MR Egger	3	-0.000700196	0.00149873	0.721759	-0.0036377	0.00223731	0.9993	0.996369	1.00224
AF5e9x	LXdEYu	Bladder cancer	AC010615.4_ENSG00000269237	Weighted median	3	0.000220205	0.00012237	0.0719399	-1.96406e-05	0.00046005	1.00022	0.99998	1.00046
AF5e9x	LXdEYu	Bladder cancer	AC010615.4_ENSG00000269237	Inverse variance weighted	3	0.000238274	0.00010865	0.0283034	2.53213e-05	0.000451227	1.00024	1.00003	1.00045
AF5e9x	LXdEYu	Bladder cancer	AC010615.4_ENSG00000269237	Simple mode	3	0.000210994	0.000158187	0.313871	-9.90528e-05	0.000521041	1.00021	0.999901	1.00052
AF5e9x	LXdEYu	Bladder cancer	AC010615.4_ENSG00000269237	Weighted mode	3	0.000205487	0.000142636	0.286379	-7.40799e-05	0.000485053	1.00021	0.999926	1.00049
AfI9yr	LXdEYu	Bladder cancer	ZNF100_ENSG00000197020	Inverse variance weighted	2	0.000197076	0.000143312	0.169083	-8.38148e-05	0.000477967	1.0002	0.999916	1.00048
Al59bv	LXdEYu	Bladder cancer	TTC7B_ENSG00000165914	Wald ratio	1	7.9261e-05	0.000348735	0.820205	-0.00060426	0.000762782	1.00008	0.999396	1.00076
AQLzw0	LXdEYu	Bladder cancer	MAP2K5_ENSG00000137764	MR Egger	3	0.00218149	0.00433957	0.70346	-0.00632406	0.010687	1.00218	0.993696	1.01074
AQLzw0	LXdEYu	Bladder cancer	MAP2K5_ENSG00000137764	Weighted median	3	5.75685e-05	0.000222704	0.796023	-0.000378931	0.000494068	1.00006	0.999621	1.00049
AQLzw0	LXdEYu	Bladder cancer	MAP2K5_ENSG00000137764	Inverse variance weighted	3	7.80935e-05	0.000195054	0.688885	-0.000304212	0.000460399	1.00008	0.999696	1.00046
AQLzw0	LXdEYu	Bladder cancer	MAP2K5_ENSG00000137764	Simple mode	3	-2.69024e-06	0.000274053	0.993059	-0.000539835	0.000534454	0.999997	0.99946	1.00053
AQLzw0	LXdEYu	Bladder cancer	MAP2K5_ENSG00000137764	Weighted mode	3	-3.50006e-07	0.000269402	0.999081	-0.000528377	0.000527677	1	0.999472	1.00053
AtAYFj	LXdEYu	Bladder cancer	LINC02613_ENSG00000231367	Wald ratio	1	0.000249937	0.000259733	0.335905	-0.000259138	0.000759013	1.00025	0.999741	1.00076
atgqbZ	LXdEYu	Bladder cancer	AC008467.1_ENSG00000249476	Wald ratio	1	0.000374386	0.000240504	0.119548	-9.70011e-05	0.000845774	1.00037	0.999903	1.00085
AvksDr	LXdEYu	Bladder cancer	RGR_ENSG00000148604	Wald ratio	1	-0.000349787	0.000241199	0.147003	-0.000822537	0.000122964	0.99965	0.999178	1.00012
axr7w7	LXdEYu	Bladder cancer	KCNH5_ENSG00000140015	Inverse variance weighted	2	7.60555e-05	0.000213999	0.722289	-0.000343382	0.000495493	1.00008	0.999657	1.0005
BGMjUV	LXdEYu	Bladder cancer	PAH_ENSG00000171759	Wald ratio	1	0.00038181	0.000248935	0.125085	-0.000106102	0.000869723	1.00038	0.999894	1.00087
bhI829	LXdEYu	Bladder cancer	TDRD6_ENSG00000180113	Wald ratio	1	0.000213811	0.00030458	0.482687	-0.000383165	0.000810788	1.00021	0.999617	1.00081
biUUKX	LXdEYu	Bladder cancer	AC004540.1_ENSG00000214870	Wald ratio	1	-0.000208755	0.000330618	0.527775	-0.000856766	0.000439257	0.999791	0.999144	1.00044
bM0J9X	LXdEYu	Bladder cancer	GOLGA6L10_ENSG00000278662	Inverse variance weighted	2	-0.000439992	0.000196825	0.0253879	-0.000825769	-5.42153e-05	0.99956	0.999175	0.999946
bOdQ67	LXdEYu	Bladder cancer	EMILIN2_ENSG00000132205	Wald ratio	1	0.000408383	0.000285065	0.151973	-0.000150344	0.00096711	1.00041	0.99985	1.00097
bpwYZf	LXdEYu	Bladder cancer	CCDC200_ENSG00000236383	Wald ratio	1	0.000442656	0.000240499	0.0656843	-2.87223e-05	0.000914035	1.00044	0.999971	1.00091
bwNhl2	LXdEYu	Bladder cancer	AC068775.1_ENSG00000255641	Wald ratio	1	-0.000236909	0.000328851	0.471269	-0.000881458	0.000407639	0.999763	0.999119	1.00041
CBlLxA	LXdEYu	Bladder cancer	C2orf80_ENSG00000188674	Wald ratio	1	-0.000196075	0.000392736	0.6176	-0.000965838	0.000573687	0.999804	0.999035	1.00057
ccCjWb	LXdEYu	Bladder cancer	ATP6AP1L_ENSG00000205464	Inverse variance weighted	2	0.000159608	0.000151506	0.292124	-0.000137345	0.00045656	1.00016	0.999863	1.00046
cCoK5G	LXdEYu	Bladder cancer	CCNB1IP1_ENSG00000100814	Wald ratio	1	-0.000284909	0.000313689	0.363745	-0.000899739	0.000329922	0.999715	0.999101	1.00033
CcQj9v	LXdEYu	Bladder cancer	U2AF1_ENSG00000160201	Wald ratio	1	4.91506e-05	0.000162171	0.76183	-0.000268704	0.000367005	1.00005	0.999731	1.00037
ChMISG	LXdEYu	Bladder cancer	LINC02440_ENSG00000255618	Wald ratio	1	0.000150791	0.000275759	0.584502	-0.000389698	0.000691279	1.00015	0.99961	1.00069
CNB4QM	LXdEYu	Bladder cancer	B4GALT6_ENSG00000118276	Wald ratio	1	3.91468e-05	0.000233562	0.866892	-0.000418636	0.000496929	1.00004	0.999581	1.0005
cni0zE	LXdEYu	Bladder cancer	INPP1_ENSG00000151689	Wald ratio	1	-0.000351413	0.000353427	0.320076	-0.00104413	0.000341303	0.999649	0.998956	1.00034
CUCGwm	LXdEYu	Bladder cancer	GSAP_ENSG00000186088	Wald ratio	1	0.000292774	0.000231459	0.205904	-0.000160885	0.000746434	1.00029	0.999839	1.00075
cUHoQv	LXdEYu	Bladder cancer	PILRB_ENSG00000121716	Wald ratio	1	-0.000278364	0.000221431	0.208712	-0.000712369	0.00015564	0.999722	0.999288	1.00016
CV2Bep	LXdEYu	Bladder cancer	AC012593.1_ENSG00000226994	Wald ratio	1	-1.70047e-05	0.000241346	0.943829	-0.000490044	0.000456034	0.999983	0.99951	1.00046
d1qneg	LXdEYu	Bladder cancer	IL20RA_ENSG00000016402	Wald ratio	1	-9.70756e-05	0.000325157	0.765283	-0.000734383	0.000540232	0.999903	0.999266	1.00054
d703Th	LXdEYu	Bladder cancer	NPIPB2_ENSG00000234719	Wald ratio	1	7.99564e-05	0.000179056	0.655204	-0.000270993	0.000430905	1.00008	0.999729	1.00043
DB282B	LXdEYu	Bladder cancer	OR2L2_ENSG00000203663	Wald ratio	1	-8.98687e-05	0.000276879	0.745501	-0.000632551	0.000452814	0.99991	0.999368	1.00045
DcAHxS	LXdEYu	Bladder cancer	OXTR_ENSG00000180914	Wald ratio	1	-0.000429655	0.000430764	0.318558	-0.00127395	0.000414643	0.99957	0.998727	1.00041
dFFZCC	LXdEYu	Bladder cancer	CAMK4_ENSG00000152495	Wald ratio	1	-0.000276986	0.0002581	0.283194	-0.000782862	0.00022889	0.999723	0.999217	1.00023
dkMszl	LXdEYu	Bladder cancer	HFM1_ENSG00000162669	Wald ratio	1	0.000448252	0.000276424	0.104887	-9.35394e-05	0.000990044	1.00045	0.999906	1.00099
dmUkGf	LXdEYu	Bladder cancer	STK32A_ENSG00000169302	Wald ratio	1	9.60932e-05	0.000327861	0.769452	-0.000546514	0.000738701	1.0001	0.999454	1.00074
DmWZuJ	LXdEYu	Bladder cancer	AC124254.1_ENSG00000264015	Wald ratio	1	0.000424943	0.000243587	0.0810679	-5.24873e-05	0.000902372	1.00043	0.999948	1.0009
DtFO6s	LXdEYu	Bladder cancer	LINC01876_ENSG00000226383	Wald ratio	1	0.000116096	0.000163073	0.476508	-0.000203526	0.000435719	1.00012	0.999796	1.00044
DyNpST	LXdEYu	Bladder cancer	CCDC122_ENSG00000151773	Inverse variance weighted	2	-0.000123191	0.000121111	0.309069	-0.000360568	0.000114186	0.999877	0.999639	1.00011
dyOWjx	LXdEYu	Bladder cancer	SUMF1_ENSG00000144455	Wald ratio	1	-9.7654e-05	0.000405057	0.809488	-0.000891566	0.000696258	0.999902	0.999109	1.0007
e1bmI3	LXdEYu	Bladder cancer	CLEC18A_ENSG00000157322	MR Egger	3	5.32904e-06	0.00172797	0.998037	-0.00338148	0.00339214	1.00001	0.996624	1.0034
e1bmI3	LXdEYu	Bladder cancer	CLEC18A_ENSG00000157322	Weighted median	3	-0.000170056	0.00017293	0.325421	-0.000508999	0.000168887	0.99983	0.999491	1.00017
e1bmI3	LXdEYu	Bladder cancer	CLEC18A_ENSG00000157322	Inverse variance weighted	3	-0.000145241	0.000144861	0.316043	-0.000429169	0.000138687	0.999855	0.999571	1.00014
e1bmI3	LXdEYu	Bladder cancer	CLEC18A_ENSG00000157322	Simple mode	3	-0.00019821	0.00020412	0.433957	-0.000598285	0.000201865	0.999802	0.999402	1.0002
e1bmI3	LXdEYu	Bladder cancer	CLEC18A_ENSG00000157322	Weighted mode	3	-0.000194954	0.000203816	0.439753	-0.000594434	0.000204526	0.999805	0.999406	1.0002
E2kHGZ	LXdEYu	Bladder cancer	GPNMB_ENSG00000136235	Inverse variance weighted	2	-0.000185573	0.000173786	0.285601	-0.000526195	0.000155048	0.999814	0.999474	1.00016
e3KYNj	LXdEYu	Bladder cancer	SEPT2_ENSG00000168385	Inverse variance weighted	2	0.000214517	0.000228451	0.347727	-0.000233247	0.000662282	1.00021	0.999767	1.00066
e4T5Gn	LXdEYu	Bladder cancer	NIPAL3_ENSG00000001461	Wald ratio	1	-0.000194964	0.000275557	0.479238	-0.000735055	0.000345127	0.999805	0.999265	1.00035
E5cvWA	LXdEYu	Bladder cancer	TXNDC15_ENSG00000113621	Inverse variance weighted	2	6.08127e-05	0.000140177	0.664414	-0.000213935	0.00033556	1.00006	0.999786	1.00034
EaAhNL	LXdEYu	Bladder cancer	ZHX2_ENSG00000178764	Wald ratio	1	-0.000370642	0.000382676	0.332768	-0.00112069	0.000379403	0.999629	0.99888	1.00038
EGXd3P	LXdEYu	Bladder cancer	LDLRAD3_ENSG00000179241	Wald ratio	1	0.000426496	0.000315685	0.17669	-0.000192247	0.00104524	1.00043	0.999808	1.00105
ehhqFW	LXdEYu	Bladder cancer	LINC01114_ENSG00000234177	Wald ratio	1	6.21367e-05	0.000240716	0.796304	-0.000409667	0.00053394	1.00006	0.99959	1.00053
eRGrV7	LXdEYu	Bladder cancer	CCSER1_ENSG00000184305	Wald ratio	1	-1.82148e-05	0.000259157	0.943967	-0.000526163	0.000489733	0.999982	0.999474	1.00049
EuBP5O	LXdEYu	Bladder cancer	AL160291.1_ENSG00000262412	Wald ratio	1	-0.000220636	0.00027589	0.423869	-0.00076138	0.000320107	0.999779	0.999239	1.00032
eXex5H	LXdEYu	Bladder cancer	ZNF25_ENSG00000175395	MR Egger	3	-0.000160821	0.00731483	0.986006	-0.0144979	0.0141762	0.999839	0.985607	1.01428
eXex5H	LXdEYu	Bladder cancer	ZNF25_ENSG00000175395	Weighted median	3	-5.25422e-05	0.000203174	0.795939	-0.000450763	0.000345679	0.999947	0.999549	1.00035
eXex5H	LXdEYu	Bladder cancer	ZNF25_ENSG00000175395	Inverse variance weighted	3	-6.88115e-05	0.000176903	0.697292	-0.000415542	0.000277919	0.999931	0.999585	1.00028
eXex5H	LXdEYu	Bladder cancer	ZNF25_ENSG00000175395	Simple mode	3	-4.70535e-05	0.000234229	0.859364	-0.000506143	0.000412036	0.999953	0.999494	1.00041
eXex5H	LXdEYu	Bladder cancer	ZNF25_ENSG00000175395	Weighted mode	3	-4.67785e-05	0.0002305	0.857952	-0.000498558	0.000405001	0.999953	0.999502	1.00041
EXKHMl	LXdEYu	Bladder cancer	ITGA8_ENSG00000077943	Wald ratio	1	-0.000157129	0.000294	0.593028	-0.00073337	0.000419111	0.999843	0.999267	1.00042
feiUdt	LXdEYu	Bladder cancer	C17orf100_ENSG00000256806	Wald ratio	1	0.000137586	0.000322157	0.669324	-0.000493843	0.000769014	1.00014	0.999506	1.00077
FFgZPY	LXdEYu	Bladder cancer	RUFY4_ENSG00000188282	Wald ratio	1	7.19351e-05	0.000224882	0.749059	-0.000368833	0.000512703	1.00007	0.999631	1.00051
fGFurw	LXdEYu	Bladder cancer	LINC02283_ENSG00000248184	Wald ratio	1	0.000120372	0.000185711	0.516874	-0.000243621	0.000484366	1.00012	0.999756	1.00048
fhXW36	LXdEYu	Bladder cancer	ECI2_ENSG00000198721	Wald ratio	1	8.47697e-05	0.000240842	0.724859	-0.00038728	0.00055682	1.00008	0.999613	1.00056
fjfyEv	LXdEYu	Bladder cancer	RNASEH2B_ENSG00000136104	Wald ratio	1	7.90158e-06	0.000259786	0.975735	-0.000501279	0.000517082	1.00001	0.999499	1.00052
FlaB0L	LXdEYu	Bladder cancer	ZNF534_ENSG00000198633	Wald ratio	1	0.000255008	0.000289912	0.379074	-0.00031322	0.000823236	1.00026	0.999687	1.00082
funs4D	LXdEYu	Bladder cancer	HLA-B_ENSG00000234745	Inverse variance weighted	2	0.000134408	0.000206139	0.514383	-0.000269623	0.00053844	1.00013	0.99973	1.00054
fUQQO8	LXdEYu	Bladder cancer	CRELD1_ENSG00000163703	Inverse variance weighted	2	-0.000407228	0.000305926	0.183146	-0.00100684	0.000192388	0.999593	0.998994	1.00019
FWqsmw	LXdEYu	Bladder cancer	NKAIN4_ENSG00000101198	Wald ratio	1	0.000209201	0.000221068	0.343986	-0.000224092	0.000642493	1.00021	0.999776	1.00064
FYXKoV	LXdEYu	Bladder cancer	AL590705.1_ENSG00000203279	Inverse variance weighted	2	7.50825e-06	0.000198874	0.969884	-0.000382285	0.000397302	1.00001	0.999618	1.0004
fzXb41	LXdEYu	Bladder cancer	PNPLA7_ENSG00000130653	Wald ratio	1	0.000482857	0.000294433	0.101014	-9.42318e-05	0.00105995	1.00048	0.999906	1.00106
gGQUDN	LXdEYu	Bladder cancer	AC093151.3_ENSG00000235358	Inverse variance weighted	2	3.85839e-07	0.00018373	0.998324	-0.000359724	0.000360496	1	0.99964	1.00036
GhAlJd	LXdEYu	Bladder cancer	CALCRL_ENSG00000064989	Inverse variance weighted	2	-6.78667e-05	0.000298416	0.820095	-0.000652763	0.000517029	0.999932	0.999347	1.00052
GJj7f4	LXdEYu	Bladder cancer	UPF3A_ENSG00000169062	Wald ratio	1	6.08271e-05	0.000240526	0.800352	-0.000410604	0.000532258	1.00006	0.999589	1.00053
GJTcUz	LXdEYu	Bladder cancer	PCM1_ENSG00000078674	Inverse variance weighted	2	0.000163283	0.000171961	0.342348	-0.00017376	0.000500326	1.00016	0.999826	1.0005
gLxZdg	LXdEYu	Bladder cancer	KLHDC4_ENSG00000104731	Wald ratio	1	-8.76057e-05	0.000157484	0.578016	-0.000396274	0.000221062	0.999912	0.999604	1.00022
GO3Zvg	LXdEYu	Bladder cancer	NPIPB13_ENSG00000198064	Wald ratio	1	-0.000405685	0.000327582	0.21556	-0.00104775	0.000236377	0.999594	0.998953	1.00024
H10Auz	LXdEYu	Bladder cancer	AL590683.1_ENSG00000230023	Wald ratio	1	-0.00011	0.000251997	0.662465	-0.000603913	0.000383914	0.99989	0.999396	1.00038
hbX0Js	LXdEYu	Bladder cancer	CERS5_ENSG00000139624	MR Egger	3	-0.000670548	0.00188275	0.782182	-0.00436073	0.00301963	0.99933	0.995649	1.00302
hbX0Js	LXdEYu	Bladder cancer	CERS5_ENSG00000139624	Weighted median	3	-0.000146967	0.000178858	0.411249	-0.000497528	0.000203594	0.999853	0.999503	1.0002
hbX0Js	LXdEYu	Bladder cancer	CERS5_ENSG00000139624	Inverse variance weighted	3	-0.00010075	0.000154363	0.513961	-0.000403301	0.000201801	0.999899	0.999597	1.0002
hbX0Js	LXdEYu	Bladder cancer	CERS5_ENSG00000139624	Simple mode	3	-0.000151919	0.000212573	0.548973	-0.000568561	0.000264724	0.999848	0.999432	1.00026
hbX0Js	LXdEYu	Bladder cancer	CERS5_ENSG00000139624	Weighted mode	3	-0.000151033	0.000200244	0.529414	-0.00054351	0.000241445	0.999849	0.999457	1.00024
hbZQWr	LXdEYu	Bladder cancer	KNOP1_ENSG00000103550	Inverse variance weighted	2	4.10815e-05	0.000177484	0.816953	-0.000306787	0.00038895	1.00004	0.999693	1.00039
HcJmr8	LXdEYu	Bladder cancer	SMC6_ENSG00000163029	Wald ratio	1	0.000175412	0.000277085	0.526694	-0.000367675	0.000718498	1.00018	0.999632	1.00072
Hg6g7J	LXdEYu	Bladder cancer	NEDD9_ENSG00000111859	Wald ratio	1	-0.000638421	0.000333665	0.055702	-0.0012924	1.55621e-05	0.999362	0.998708	1.00002
hLQs0h	LXdEYu	Bladder cancer	TTC23_ENSG00000103852	Inverse variance weighted	2	-1.49461e-06	0.000164549	0.992753	-0.000324011	0.000321021	0.999999	0.999676	1.00032
Hx0hLT	LXdEYu	Bladder cancer	EVI5L_ENSG00000142459	Wald ratio	1	-0.000346569	0.000373943	0.354033	-0.0010795	0.000386359	0.999653	0.998921	1.00039
I2miKZ	LXdEYu	Bladder cancer	AC090403.1_ENSG00000264151	Wald ratio	1	-0.000139301	0.000220478	0.527507	-0.000571439	0.000292836	0.999861	0.999429	1.00029
I6kEX2	LXdEYu	Bladder cancer	CSGALNACT2_ENSG00000169826	Inverse variance weighted	2	0.000172126	0.00019028	0.365682	-0.000200824	0.000545076	1.00017	0.999799	1.00055
I8U1Vv	LXdEYu	Bladder cancer	AC147651.1_ENSG00000223855	Wald ratio	1	0.000440635	0.000261652	0.0921713	-7.22017e-05	0.000953472	1.00044	0.999928	1.00095
I8xB8M	LXdEYu	Bladder cancer	CHST8_ENSG00000124302	Wald ratio	1	6.91606e-05	0.000232088	0.765709	-0.000385732	0.000524054	1.00007	0.999614	1.00052
IftEaQ	LXdEYu	Bladder cancer	MAEL_ENSG00000143194	Wald ratio	1	-0.000411348	0.000238153	0.0841247	-0.000878128	5.54327e-05	0.999589	0.999122	1.00006
Ig71wE	LXdEYu	Bladder cancer	AC005697.1_ENSG00000266202	Wald ratio	1	0.000221613	0.000309777	0.474366	-0.000385551	0.000828777	1.00022	0.999615	1.00083
IgwqFF	LXdEYu	Bladder cancer	GSTM5_ENSG00000134201	Wald ratio	1	0.000202609	0.00026802	0.449681	-0.00032271	0.000727927	1.0002	0.999677	1.00073
ihRVn0	LXdEYu	Bladder cancer	AC092902.2_ENSG00000272840	MR Egger	3	0.00207695	0.00473348	0.736769	-0.00720067	0.0113546	1.00208	0.992825	1.01142
ihRVn0	LXdEYu	Bladder cancer	AC092902.2_ENSG00000272840	Weighted median	3	0.000154917	0.000164881	0.34744	-0.00016825	0.000478083	1.00015	0.999832	1.00048
ihRVn0	LXdEYu	Bladder cancer	AC092902.2_ENSG00000272840	Inverse variance weighted	3	0.000141889	0.000145481	0.329406	-0.000143253	0.000427032	1.00014	0.999857	1.00043
ihRVn0	LXdEYu	Bladder cancer	AC092902.2_ENSG00000272840	Simple mode	3	0.000171774	0.000202917	0.486399	-0.000225943	0.000569491	1.00017	0.999774	1.00057
ihRVn0	LXdEYu	Bladder cancer	AC092902.2_ENSG00000272840	Weighted mode	3	0.000169799	0.000183481	0.452437	-0.000189823	0.000529422	1.00017	0.99981	1.00053
iILXgV	LXdEYu	Bladder cancer	PTDSS1_ENSG00000156471	Wald ratio	1	-3.06798e-06	0.000288676	0.99152	-0.000568872	0.000562736	0.999997	0.999431	1.00056
IIna6q	LXdEYu	Bladder cancer	FAM118A_ENSG00000100376	Wald ratio	1	0.000168142	0.00020848	0.419947	-0.000240479	0.000576763	1.00017	0.99976	1.00058
IiXjOg	LXdEYu	Bladder cancer	AC027020.2_ENSG00000270127	Wald ratio	1	0.0001872	0.000229058	0.413779	-0.000261753	0.000636154	1.00019	0.999738	1.00064
iJPMNq	LXdEYu	Bladder cancer	ERC1_ENSG00000082805	Wald ratio	1	-0.000498621	0.000346749	0.150438	-0.00117825	0.000181008	0.999502	0.998822	1.00018
IqTSOd	LXdEYu	Bladder cancer	AKNA_ENSG00000106948	Wald ratio	1	-0.000400213	0.000216689	0.0647554	-0.000824924	2.44982e-05	0.9996	0.999175	1.00002
IsSYTW	LXdEYu	Bladder cancer	ITGB3BP_ENSG00000142856	Inverse variance weighted	2	-0.000132654	0.00013927	0.340844	-0.000405623	0.000140315	0.999867	0.999594	1.00014
IwOkGp	LXdEYu	Bladder cancer	GNG12_ENSG00000172380	Wald ratio	1	0.000107767	0.000329024	0.743263	-0.00053712	0.000752655	1.00011	0.999463	1.00075
J4PO1u	LXdEYu	Bladder cancer	GALR1_ENSG00000166573	Wald ratio	1	0.000537724	0.000308235	0.0810679	-6.64176e-05	0.00114186	1.00054	0.999934	1.00114
jaYitG	LXdEYu	Bladder cancer	AC096887.1_ENSG00000272305	MR Egger	3	0.000536699	0.00317955	0.893544	-0.00569522	0.00676862	1.00054	0.994321	1.00679
jaYitG	LXdEYu	Bladder cancer	AC096887.1_ENSG00000272305	Weighted median	3	4.96138e-05	0.000179745	0.782531	-0.000302687	0.000401915	1.00005	0.999697	1.0004
jaYitG	LXdEYu	Bladder cancer	AC096887.1_ENSG00000272305	Inverse variance weighted	3	4.19254e-05	0.000155554	0.787527	-0.000262961	0.000346812	1.00004	0.999737	1.00035
jaYitG	LXdEYu	Bladder cancer	AC096887.1_ENSG00000272305	Simple mode	3	5.42146e-05	0.000210724	0.821015	-0.000358805	0.000467235	1.00005	0.999641	1.00047
jaYitG	LXdEYu	Bladder cancer	AC096887.1_ENSG00000272305	Weighted mode	3	5.76677e-05	0.000215514	0.814089	-0.000364739	0.000480074	1.00006	0.999635	1.00048
jnWxio	LXdEYu	Bladder cancer	C3orf20_ENSG00000131379	Wald ratio	1	-0.000142156	0.000246913	0.564795	-0.000626106	0.000341793	0.999858	0.999374	1.00034
jV52T6	LXdEYu	Bladder cancer	NOS1_ENSG00000089250	Wald ratio	1	-2.9113e-05	0.000219529	0.894497	-0.000459389	0.000401163	0.999971	0.999541	1.0004
jxxYhB	LXdEYu	Bladder cancer	CLEC14A_ENSG00000176435	Wald ratio	1	0.000377423	0.000316916	0.233683	-0.000243732	0.000998577	1.00038	0.999756	1.001
kAGg35	LXdEYu	Bladder cancer	HSD17B13_ENSG00000170509	Wald ratio	1	0.000101034	0.000287109	0.724912	-0.0004617	0.000663768	1.0001	0.999538	1.00066
kCNWeF	LXdEYu	Bladder cancer	KLRC1_ENSG00000134545	Wald ratio	1	-0.000117239	0.00024448	0.631552	-0.000596419	0.000361942	0.999883	0.999404	1.00036
klwFve	LXdEYu	Bladder cancer	FBN2_ENSG00000138829	MR Egger	3	0.000265053	0.00202624	0.917194	-0.00370637	0.00423648	1.00027	0.9963	1.00425
[truncated: 197 more rows]

## Sheet: Supplementary table 20
id.exposure	id.outcome	outcome	exposure	method	nsnp	b	se	pval	lo_ci	up_ci	or	or_lci95	or_uci95
[truncated: 768 more rows]

## Sheet: Supplementary table 21
id.exposure	id.outcome	outcome	exposure	method	nsnp	b	se	pval	lo_ci	up_ci	or	or_lci95	or_uci95
[truncated: 286 more rows]

[truncated: 61 more sheets: Supplementary table 22, Supplementary table 23, Supplementary table 24, Supplementary table 25, Supplementary table 26, Supplementary table 27, Supplementary table 28, Supplementary table 29, Supplementary table 30, Supplementary table 31, Supplementary table 32, Supplementary table 33, Supplementary table 34, Supplementary table 35, Supplementary table 36, Supplementary table 37, Supplementary table 38, Supplementary table 39, Supplementary table 40, Supplementary table 41 …]
