# Supplementary material for: Mendelian randomization analysis integrating GWAS and eQTL data identified potential regulatory genes associated with prostate cancer in neural cells
Source: Research Square preprint supplement (doi:10.21203/rs.3.rs-6747184/v1), 2025-07-21
Supplement: Supplementary file 2 [file f4fe128c08d9641de6528a45.xlsx]

## Sheet: Supplementary table 1
	id.exposure	id.outcome	outcome	exposure	method	Q	Q_df	Q_pval
1	80zmoG	NKRO8l	outcome	OR2L5_ENSG00000197454	MR Egger	0.0322444	2	0.984007
2	80zmoG	NKRO8l	outcome	OR2L5_ENSG00000197454	Inverse variance weighted	0.08178	3	0.99393
3	8MdKyH	NKRO8l	outcome	KANSL1_ENSG00000120071	MR Egger	0.0128095	1	0.909889
4	8MdKyH	NKRO8l	outcome	KANSL1_ENSG00000120071	Inverse variance weighted	0.031066	2	0.984587
5	bAPFdT	NKRO8l	outcome	LRRC37A2_ENSG00000238083	MR Egger	0.00965517	1	0.921725
6	bAPFdT	NKRO8l	outcome	LRRC37A2_ENSG00000238083	Inverse variance weighted	0.0135826	2	0.993232
7	CFpETp	NKRO8l	outcome	GATD3A_ENSG00000160221	Inverse variance weighted	0.363627	1	0.546499
8	ExF8fi	NKRO8l	outcome	LINC02210-CRHR1_ENSG00000263715	Inverse variance weighted	0.00597339	1	0.938395
9	f1R33P	NKRO8l	outcome	OR2M4_ENSG00000171180	MR Egger	0.0575619	2	0.971629
10	f1R33P	NKRO8l	outcome	OR2M4_ENSG00000171180	Inverse variance weighted	0.0930806	3	0.992655
11	itfwzs	NKRO8l	outcome	ANKRD36_ENSG00000135976	MR Egger	0.00370737	1	0.951448
12	itfwzs	NKRO8l	outcome	ANKRD36_ENSG00000135976	Inverse variance weighted	0.00755384	2	0.99623
13	n5vsSH	NKRO8l	outcome	OR2L3_ENSG00000198128	MR Egger	0.0282338	2	0.985982
14	n5vsSH	NKRO8l	outcome	OR2L3_ENSG00000198128	Inverse variance weighted	0.0705	3	0.995125
15	soeCxT	NKRO8l	outcome	HBS1L_ENSG00000112339	Inverse variance weighted	0.0265866	1	0.870476
16	tgiyke	NKRO8l	outcome	ARL17B_ENSG00000228696	MR Egger	0.0194109	2	0.990342
17	tgiyke	NKRO8l	outcome	ARL17B_ENSG00000228696	Inverse variance weighted	0.0692122	3	0.995257
18	V0Tgiu	NKRO8l	outcome	OR2L2_ENSG00000203663	MR Egger	0.0539018	2	0.973409
19	V0Tgiu	NKRO8l	outcome	OR2L2_ENSG00000203663	Inverse variance weighted	0.0836609	3	0.993723
20	WH6egJ	NKRO8l	outcome	OR2L13_ENSG00000196071	MR Egger	0.0199268	2	0.990086
21	WH6egJ	NKRO8l	outcome	OR2L13_ENSG00000196071	Inverse variance weighted	0.0689431	3	0.995284
22	XXHMF7	NKRO8l	outcome	CENPP_ENSG00000188312	Inverse variance weighted	1.09648	1	0.29504
23	ZirI4p	NKRO8l	outcome	ALDH8A1_ENSG00000118514	Inverse variance weighted	0.0229483	1	0.879592
24	ZWZue5	NKRO8l	outcome	PWP2_ENSG00000241945	Inverse variance weighted	0.384882	1	0.535002

## Sheet: Supplementary table 2
	id.exposure	id.outcome	outcome	exposure	method	Q	Q_df	Q_pval
1	lDnzpg	F5HX9y	outcome	LRRC37A2_ENSG00000238083	MR Egger	0.00689428	2	0.996559
2	lDnzpg	F5HX9y	outcome	LRRC37A2_ENSG00000238083	Inverse variance weighted	0.00692704	3	0.999847
3	OnEFbh	F5HX9y	outcome	ARL17B_ENSG00000228696	MR Egger	0.0286457	2	0.985779
4	OnEFbh	F5HX9y	outcome	ARL17B_ENSG00000228696	Inverse variance weighted	0.0293351	3	0.998675
5	qszpVn	F5HX9y	outcome	GATD3A_ENSG00000160221	Inverse variance weighted	0.356721	1	0.550333
6	VOJLoU	F5HX9y	outcome	KANSL1_ENSG00000120071	MR Egger	0.0440114	2	0.978235
7	VOJLoU	F5HX9y	outcome	KANSL1_ENSG00000120071	Inverse variance weighted	0.106728	3	0.991018

## Sheet: Supplementary table 3
	id.exposure	id.outcome	outcome	exposure	method	Q	Q_df	Q_pval
1	6doINr	J4DiAg	outcome	GATD3A_ENSG00000160221	Inverse variance weighted	0.354679	1	0.551477
2	7rD92Q	J4DiAg	outcome	KANSL1_ENSG00000120071	MR Egger	0.0358293	2	0.982245
3	7rD92Q	J4DiAg	outcome	KANSL1_ENSG00000120071	Inverse variance weighted	0.042133	3	0.997729
4	cCxPpi	J4DiAg	outcome	LRRC37A2_ENSG00000238083	MR Egger	0.0175227	2	0.991277
5	cCxPpi	J4DiAg	outcome	LRRC37A2_ENSG00000238083	Inverse variance weighted	0.0246479	3	0.998978
6	DKK5ZM	J4DiAg	outcome	LINC02210-CRHR1_ENSG00000263715	MR Egger	1.45514e-06	1	0.999038
7	DKK5ZM	J4DiAg	outcome	LINC02210-CRHR1_ENSG00000263715	Inverse variance weighted	0.020246	2	0.989928
8	oHKMsR	J4DiAg	outcome	PWP2_ENSG00000241945	Inverse variance weighted	0.38946	1	0.532583
9	Tqc6ig	J4DiAg	outcome	ARL17B_ENSG00000228696	MR Egger	0.0200728	2	0.990014
10	Tqc6ig	J4DiAg	outcome	ARL17B_ENSG00000228696	Inverse variance weighted	0.0368434	3	0.99814
11	zgaigb	J4DiAg	outcome	AC005670.2_ENSG00000262633	Inverse variance weighted	0.000288256	1	0.986454

## Sheet: Supplementary table 4
	id.exposure	id.outcome	outcome	exposure	method	Q	Q_df	Q_pval
1	3qFbPH	vZ4bzp	outcome	SPATA1_ENSG00000122432	Inverse variance weighted	0.0855216	1	0.76995
2	6oP3IH	vZ4bzp	outcome	AC124657.1_ENSG00000254532	Inverse variance weighted	0.00561209	1	0.940283
3	7Ma2jS	vZ4bzp	outcome	ECM2_ENSG00000106823	Inverse variance weighted	7.09852e-05	1	0.993278
4	aVuW9d	vZ4bzp	outcome	HBS1L_ENSG00000112339	Inverse variance weighted	0.0295004	1	0.863629
5	CNh1or	vZ4bzp	outcome	LRRC37A2_ENSG00000238083	MR Egger	0.0151941	2	0.992432
6	CNh1or	vZ4bzp	outcome	LRRC37A2_ENSG00000238083	Inverse variance weighted	0.0159643	3	0.999466
7	d5yDRA	vZ4bzp	outcome	ANKRD36_ENSG00000135976	MR Egger	0.00182666	1	0.965909
8	d5yDRA	vZ4bzp	outcome	ANKRD36_ENSG00000135976	Inverse variance weighted	0.0111999	2	0.994416
9	EET2S7	vZ4bzp	outcome	KANSL1_ENSG00000120071	MR Egger	0.0146675	1	0.903604
10	EET2S7	vZ4bzp	outcome	KANSL1_ENSG00000120071	Inverse variance weighted	0.0788497	2	0.961342
11	Eul0nA	vZ4bzp	outcome	OR2M3_ENSG00000228198	MR Egger	0.00261761	1	0.959196
12	Eul0nA	vZ4bzp	outcome	OR2M3_ENSG00000228198	Inverse variance weighted	0.0197902	2	0.990154
13	hqA6IU	vZ4bzp	outcome	LINC02210-CRHR1_ENSG00000263715	Inverse variance weighted	0.00900719	1	0.924389
14	Ky4wLT	vZ4bzp	outcome	ALDH8A1_ENSG00000118514	Inverse variance weighted	0.0436804	1	0.834449
15	NRxYGb	vZ4bzp	outcome	GALNT3_ENSG00000115339	Inverse variance weighted	2.2459e-05	1	0.996219
16	O9dWrB	vZ4bzp	outcome	PWP2_ENSG00000241945	Inverse variance weighted	0.387718	1	0.533502
17	q6mKsN	vZ4bzp	outcome	OR2L2_ENSG00000203663	MR Egger	0.0388471	2	0.980764
18	q6mKsN	vZ4bzp	outcome	OR2L2_ENSG00000203663	Inverse variance weighted	0.155749	3	0.984395
19	qIMFGt	vZ4bzp	outcome	ZNF429_ENSG00000197013	Inverse variance weighted	0.621974	1	0.430315
20	rgChAw	vZ4bzp	outcome	GATD3A_ENSG00000160221	Inverse variance weighted	0.36452	1	0.546006
21	TdLnio	vZ4bzp	outcome	CENPP_ENSG00000188312	Inverse variance weighted	0.624835	1	0.429256
22	V0cToo	vZ4bzp	outcome	ANKRD36B_ENSG00000196912	MR Egger	0.00279491	1	0.957838
23	V0cToo	vZ4bzp	outcome	ANKRD36B_ENSG00000196912	Inverse variance weighted	0.00699176	2	0.99651
24	VEbsO2	vZ4bzp	outcome	AC009495.1_ENSG00000229195	Inverse variance weighted	0.00822876	1	0.927721
25	VoGuRL	vZ4bzp	outcome	OR2L13_ENSG00000196071	MR Egger	0.034628	2	0.982835
26	VoGuRL	vZ4bzp	outcome	OR2L13_ENSG00000196071	Inverse variance weighted	0.154812	3	0.984532
27	VRtPrG	vZ4bzp	outcome	ARL17B_ENSG00000228696	MR Egger	0.0329912	2	0.98364
28	VRtPrG	vZ4bzp	outcome	ARL17B_ENSG00000228696	Inverse variance weighted	0.16833	3	0.982532
29	WH5kAS	vZ4bzp	outcome	OR2M4_ENSG00000171180	MR Egger	0.00229587	2	0.998853
30	WH5kAS	vZ4bzp	outcome	OR2M4_ENSG00000171180	Inverse variance weighted	0.101964	3	0.991601
31	wSSR14	vZ4bzp	outcome	ANKRD18B_ENSG00000230453	Inverse variance weighted	0.00502783	1	0.943472
32	x9kAUr	vZ4bzp	outcome	OR2L3_ENSG00000198128	MR Egger	0.088484	2	0.956722
33	x9kAUr	vZ4bzp	outcome	OR2L3_ENSG00000198128	Inverse variance weighted	0.141631	3	0.986411
34	xiWGbl	vZ4bzp	outcome	AC090124.1_ENSG00000254530	Inverse variance weighted	0.00495665	1	0.943873
35	ZqlDnG	vZ4bzp	outcome	OR2L5_ENSG00000197454	MR Egger	0.0972264	2	0.95255
36	ZqlDnG	vZ4bzp	outcome	OR2L5_ENSG00000197454	Inverse variance weighted	0.116281	3	0.989814
37	Zt48Mc	vZ4bzp	outcome	CYP4F26P_ENSG00000226562	Inverse variance weighted	0.0173654	1	0.89516

## Sheet: Supplementary table 5
	id.exposure	id.outcome	outcome	exposure	method	Q	Q_df	Q_pval
1	39UrvM	0N5O6x	outcome	MUC20-OT1_ENSG00000242086	Inverse variance weighted	3.18773	1	0.0741931
2	5vbgC9	0N5O6x	outcome	ARL17B_ENSG00000228696	MR Egger	0.0303623	2	0.984934
3	5vbgC9	0N5O6x	outcome	ARL17B_ENSG00000228696	Inverse variance weighted	0.19375	3	0.978592
4	ghTsFV	0N5O6x	outcome	LRRC37A2_ENSG00000238083	MR Egger	0.0131156	1	0.908823
5	ghTsFV	0N5O6x	outcome	LRRC37A2_ENSG00000238083	Inverse variance weighted	0.0212908	2	0.989411
6	GJZmlM	0N5O6x	outcome	KANSL1_ENSG00000120071	MR Egger	0.0150995	1	0.902202
7	GJZmlM	0N5O6x	outcome	KANSL1_ENSG00000120071	Inverse variance weighted	0.0487292	2	0.97593
8	RWOk5n	0N5O6x	outcome	PWP2_ENSG00000241945	Inverse variance weighted	0.383788	1	0.535583
9	zLSvFb	0N5O6x	outcome	GATD3A_ENSG00000160221	Inverse variance weighted	0.366934	1	0.54468

## Sheet: Supplementary table 6
	id.exposure	id.outcome	outcome	exposure	method	Q	Q_df	Q_pval
1	80zmoG	NKRO8l	outcome	OR2L5_ENSG00000197454	MR Egger	0.0322444	2	0.984007
2	80zmoG	NKRO8l	outcome	OR2L5_ENSG00000197454	Inverse variance weighted	0.08178	3	0.99393
3	8MdKyH	NKRO8l	outcome	KANSL1_ENSG00000120071	MR Egger	0.0128095	1	0.909889
4	8MdKyH	NKRO8l	outcome	KANSL1_ENSG00000120071	Inverse variance weighted	0.031066	2	0.984587
5	bAPFdT	NKRO8l	outcome	LRRC37A2_ENSG00000238083	MR Egger	0.00965516	1	0.921725
6	bAPFdT	NKRO8l	outcome	LRRC37A2_ENSG00000238083	Inverse variance weighted	0.0135826	2	0.993232
7	CFpETp	NKRO8l	outcome	GATD3A_ENSG00000160221	Inverse variance weighted	0.363627	1	0.546499
8	ExF8fi	NKRO8l	outcome	LINC02210-CRHR1_ENSG00000263715	Inverse variance weighted	0.00597339	1	0.938395
9	f1R33P	NKRO8l	outcome	OR2M4_ENSG00000171180	MR Egger	0.0575619	2	0.971629
10	f1R33P	NKRO8l	outcome	OR2M4_ENSG00000171180	Inverse variance weighted	0.0930806	3	0.992655
11	itfwzs	NKRO8l	outcome	ANKRD36_ENSG00000135976	MR Egger	0.00370737	1	0.951448
12	itfwzs	NKRO8l	outcome	ANKRD36_ENSG00000135976	Inverse variance weighted	0.00755384	2	0.99623
13	n5vsSH	NKRO8l	outcome	OR2L3_ENSG00000198128	MR Egger	0.0282338	2	0.985982
14	n5vsSH	NKRO8l	outcome	OR2L3_ENSG00000198128	Inverse variance weighted	0.0705	3	0.995125
15	soeCxT	NKRO8l	outcome	HBS1L_ENSG00000112339	Inverse variance weighted	0.0265866	1	0.870476
16	tgiyke	NKRO8l	outcome	ARL17B_ENSG00000228696	MR Egger	0.0194109	2	0.990342
17	tgiyke	NKRO8l	outcome	ARL17B_ENSG00000228696	Inverse variance weighted	0.0692122	3	0.995257
18	V0Tgiu	NKRO8l	outcome	OR2L2_ENSG00000203663	MR Egger	0.0539018	2	0.973409
19	V0Tgiu	NKRO8l	outcome	OR2L2_ENSG00000203663	Inverse variance weighted	0.0836609	3	0.993723
20	WH6egJ	NKRO8l	outcome	OR2L13_ENSG00000196071	MR Egger	0.0199268	2	0.990086
21	WH6egJ	NKRO8l	outcome	OR2L13_ENSG00000196071	Inverse variance weighted	0.0689431	3	0.995284
22	XXHMF7	NKRO8l	outcome	CENPP_ENSG00000188312	Inverse variance weighted	1.09648	1	0.29504
23	ZirI4p	NKRO8l	outcome	ALDH8A1_ENSG00000118514	Inverse variance weighted	0.0229483	1	0.879592
24	ZWZue5	NKRO8l	outcome	PWP2_ENSG00000241945	Inverse variance weighted	0.384882	1	0.535002

## Sheet: Supplementary table 7
	id.exposure	id.outcome	outcome	exposure	egger_intercept	se	pval
1	80zmoG	NKRO8l	outcome	OR2L5_ENSG00000197454	-0.0194016	0.0871725	0.844536
2	8MdKyH	NKRO8l	outcome	KANSL1_ENSG00000120071	-0.015632	0.115693	0.9145
3	bAPFdT	NKRO8l	outcome	LRRC37A2_ENSG00000238083	-0.00975669	0.155686	0.960156
4	CFpETp	NKRO8l	outcome	GATD3A_ENSG00000160221	NA	NA	NA
5	ExF8fi	NKRO8l	outcome	LINC02210-CRHR1_ENSG00000263715	NA	NA	NA
6	f1R33P	NKRO8l	outcome	OR2M4_ENSG00000171180	-0.0189526	0.100563	0.867904
7	itfwzs	NKRO8l	outcome	ANKRD36_ENSG00000135976	0.0116559	0.187937	0.960567
8	n5vsSH	NKRO8l	outcome	OR2L3_ENSG00000198128	-0.0139155	0.0676867	0.85614
9	soeCxT	NKRO8l	outcome	HBS1L_ENSG00000112339	NA	NA	NA
10	tgiyke	NKRO8l	outcome	ARL17B_ENSG00000228696	-0.00724558	0.0324678	0.844129
11	V0Tgiu	NKRO8l	outcome	OR2L2_ENSG00000203663	-0.013098	0.0759265	0.878916
12	WH6egJ	NKRO8l	outcome	OR2L13_ENSG00000196071	-0.0153834	0.0694836	0.845333
13	XXHMF7	NKRO8l	outcome	CENPP_ENSG00000188312	NA	NA	NA
14	ZirI4p	NKRO8l	outcome	ALDH8A1_ENSG00000118514	NA	NA	NA
15	ZWZue5	NKRO8l	outcome	PWP2_ENSG00000241945	NA	NA	NA

## Sheet: Supplementary table 8
	id.exposure	id.outcome	outcome	exposure	egger_intercept	se	pval
1	lDnzpg	F5HX9y	outcome	LRRC37A2_ENSG00000238083	-0.000638385	0.111538	0.995953
2	OnEFbh	F5HX9y	outcome	ARL17B_ENSG00000228696	-0.00352245	0.134155	0.981437
3	qszpVn	F5HX9y	outcome	GATD3A_ENSG00000160221	NA	NA	NA
4	VOJLoU	F5HX9y	outcome	KANSL1_ENSG00000120071	-0.0406855	0.162461	0.82563

## Sheet: Supplementary table 9
	id.exposure	id.outcome	outcome	exposure	egger_intercept	se	pval
1	6doINr	J4DiAg	outcome	GATD3A_ENSG00000160221	NA	NA	NA
2	7rD92Q	J4DiAg	outcome	KANSL1_ENSG00000120071	-0.00922478	0.116187	0.943947
3	cCxPpi	J4DiAg	outcome	LRRC37A2_ENSG00000238083	-0.00761451	0.0902074	0.940418
4	DKK5ZM	J4DiAg	outcome	LINC02210-CRHR1_ENSG00000263715	-0.0591192	0.415504	0.910024
5	oHKMsR	J4DiAg	outcome	PWP2_ENSG00000241945	NA	NA	NA
6	Tqc6ig	J4DiAg	outcome	ARL17B_ENSG00000228696	-0.0102549	0.0791875	0.90881
7	zgaigb	J4DiAg	outcome	AC005670.2_ENSG00000262633	NA	NA	NA

## Sheet: Supplementary table 10
	id.exposure	id.outcome	outcome	exposure	egger_intercept	se	pval
1	3qFbPH	vZ4bzp	outcome	SPATA1_ENSG00000122432	NA	NA	NA
2	6oP3IH	vZ4bzp	outcome	AC124657.1_ENSG00000254532	NA	NA	NA
3	7Ma2jS	vZ4bzp	outcome	ECM2_ENSG00000106823	NA	NA	NA
4	aVuW9d	vZ4bzp	outcome	HBS1L_ENSG00000112339	NA	NA	NA
5	CNh1or	vZ4bzp	outcome	LRRC37A2_ENSG00000238083	-0.00125206	0.0451174	0.980381
6	d5yDRA	vZ4bzp	outcome	ANKRD36_ENSG00000135976	0.071056	0.733932	0.938557
7	EET2S7	vZ4bzp	outcome	KANSL1_ENSG00000120071	-0.0194929	0.076943	0.842041
8	Eul0nA	vZ4bzp	outcome	OR2M3_ENSG00000228198	-0.0334267	0.255079	0.917047
9	hqA6IU	vZ4bzp	outcome	LINC02210-CRHR1_ENSG00000263715	NA	NA	NA
10	Ky4wLT	vZ4bzp	outcome	ALDH8A1_ENSG00000118514	NA	NA	NA
11	NRxYGb	vZ4bzp	outcome	GALNT3_ENSG00000115339	NA	NA	NA
12	O9dWrB	vZ4bzp	outcome	PWP2_ENSG00000241945	NA	NA	NA
13	q6mKsN	vZ4bzp	outcome	OR2L2_ENSG00000203663	0.0491742	0.143822	0.765004
14	qIMFGt	vZ4bzp	outcome	ZNF429_ENSG00000197013	NA	NA	NA
15	rgChAw	vZ4bzp	outcome	GATD3A_ENSG00000160221	NA	NA	NA
16	TdLnio	vZ4bzp	outcome	CENPP_ENSG00000188312	NA	NA	NA
17	V0cToo	vZ4bzp	outcome	ANKRD36B_ENSG00000196912	-0.0115479	0.178255	0.958815
18	VEbsO2	vZ4bzp	outcome	AC009495.1_ENSG00000229195	NA	NA	NA
19	VoGuRL	vZ4bzp	outcome	OR2L13_ENSG00000196071	0.0523714	0.151068	0.761913
20	VRtPrG	vZ4bzp	outcome	ARL17B_ENSG00000228696	-0.0100431	0.0272996	0.748245
21	WH5kAS	vZ4bzp	outcome	OR2M4_ENSG00000171180	-0.0657065	0.208128	0.782128
22	wSSR14	vZ4bzp	outcome	ANKRD18B_ENSG00000230453	NA	NA	NA
23	x9kAUr	vZ4bzp	outcome	OR2L3_ENSG00000198128	0.0402104	0.174422	0.839111
24	xiWGbl	vZ4bzp	outcome	AC090124.1_ENSG00000254530	NA	NA	NA
25	ZqlDnG	vZ4bzp	outcome	OR2L5_ENSG00000197454	-0.0356282	0.258103	0.902854
26	Zt48Mc	vZ4bzp	outcome	CYP4F26P_ENSG00000226562	NA	NA	NA

[truncated: 2 more sheets: Supplementary table 11, Supplementary table 12]
